# Supplementary material for: Carvedilol microemulsion-loaded oleogel: development and validation via an HPLC method, identification of three degradation products, and toxicity prediction
Source: Royal Society of Chemistry journal article supplement (doi:10.1039/d5ay01393c), 2025-01-01
Supplement: d5ay01393c1.pdf [file d5ay01393c1.pdf]

**Supplementary Materials:**

**Carvedilol Microemulsion-Loaded Oleogel: Development and Validation of HPLC Method,  
Identification of three Degradation Products, and Toxicity Prediction**

**Table 1S. Summary of some trials for the HPLC development method**

| Mobile phase                                                                | Column                                | R <sub>t</sub> (min) | Asymmetry | Theoretical Plates | Representative Chromatograms                                                         | Notes                     |
|-----------------------------------------------------------------------------|---------------------------------------|----------------------|-----------|--------------------|--------------------------------------------------------------------------------------|---------------------------|
| (0.005M KH <sub>2</sub> PO <sub>4</sub> : MeCN) (450:550), adjust pH 3.0    | Hypersil C18 (250×4.6) mm, 5µm        | 6.21                 | 3.7       | 3273               | 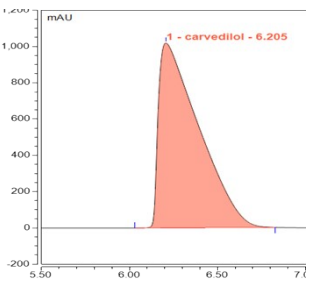   | Tailing peak              |
| (0.005M KH <sub>2</sub> PO <sub>4</sub> : MeCN) (600:400), adjust to pH 3.0 | Ace C18 (250×4.6) mm, 5µm             | 5.65                 | 2.79      | 4962               |   | Tailing peak              |
| (Buffer 0.015M pH 2.70: MeCN) (550:450)                                     | Phenomenx Luna C18 (250×4.6) mm, 5 µm | 3.29                 | 1.02      | 3734               |  | Optimum peak (Ideal peak) |
|                                                                             | Ace C18 (250×4.6) mm, 5µm             | 3.67                 | 1.06      | 14808              |  |                           |

**Table 2S. Summary of all trials to select the solvent and method of sample preparation for CARV-MEOG**

| Solvent                                                         | Method of Preparation                                                                                                                                                  |                                    |                           | Assay (%) |
|-----------------------------------------------------------------|------------------------------------------------------------------------------------------------------------------------------------------------------------------------|------------------------------------|---------------------------|-----------|
|                                                                 | Sonication time (min)                                                                                                                                                  | Stirring time (min)                | Centrifugation time (min) |           |
| Mobile phase                                                    | 15                                                                                                                                                                     | -                                  | 10 at 4000 rpm            | 85.0      |
| 0.1 M HCl<br>(A dilution was done using the mobile phase)       | 30                                                                                                                                                                     | -                                  | -                         | 76.7      |
| MeOH                                                            | 15                                                                                                                                                                     | -                                  | 10 at 4000 rpm            | 82.7      |
| Mobile phase                                                    | 30                                                                                                                                                                     | -                                  | 10 at 4000 rpm            | 84.9      |
|                                                                 |                                                                                                                                                                        |                                    | -                         | 85.3      |
| (0.015M KH <sub>2</sub> PO <sub>4</sub> pH 2.70: MeOH) (55: 45) | 30                                                                                                                                                                     | -                                  | -                         | 81.6      |
| (0.1 M HCl: MeOH) (1: 9) (0.01 mg/ml) add 20 ml MeOH            | 15 min, then add diluent, 15 min                                                                                                                                       | 30                                 | 15 at 3500 rpm            | 77.2      |
|                                                                 | 15 min add diluent then 15 min                                                                                                                                         | 30                                 | -                         | 78.6      |
| (Water: MeOH) (25:75)                                           | 30 min                                                                                                                                                                 | -                                  | -                         | 73.4      |
| (0.1 M HCl: MeOH) (1: 9) for (0.5 g) 0.125 mg/ml                | 15 min add diluent then 15 min                                                                                                                                         | 30                                 | 15 at 3500 rpm            | 77.3      |
|                                                                 | 15 min add diluent then 15 min                                                                                                                                         | 30                                 | -                         | 76.7      |
| Mobile phase                                                    | -                                                                                                                                                                      | Heat at 40 °C with stirring for 20 | -                         | 84.0      |
| (0.1 M HCl: EthOH) (1: 9), dissolve with 10 ml EthOH            | -                                                                                                                                                                      | Heat at 40 °C with stirring for 20 | -                         | 62.0      |
| 10 ml THF then EthOH                                            | -                                                                                                                                                                      | Heat at 40 °C with stirring for 20 | -                         | 68.0      |
| 0.1 M HCl                                                       | -                                                                                                                                                                      | Heat at 40 °C with stirring for 20 | -                         | 77.4      |
| (0.1 M HCl: MeCN) (1: 9)                                        | Adding 10 ml of MeCN and sonicating for 15 min, followed by adding the diluent and sonicating for another 15 min. Then stirring for 30 min.                            |                                    |                           | 69.1      |
| (0.1 M HCl: MeOH) (1: 9)                                        | Adding 20 ml of MeOH and sonicating for 15 min, followed by adding the diluent and sonicating for another 30 min. Then stirring for 45 min.                            |                                    |                           | 65.6      |
| (0.1 M HCl: MeOH) (3:7)                                         | Adding 20 ml of MeOH and sonicating for 20 min, followed by adding the diluent and sonicating for another 20 min. Then stirring for 45 min.                            |                                    |                           | 68.6      |
| Mobile phase                                                    | Sonicate for 20 min then complete volume with diluent, then transfer the solution to prep tubes and mixing for 45 min at 5000 rpm using Distek prep engine instrument. |                                    |                           | 69.3      |
| (0.1 M HCl: MeOH) (1: 9)                                        |                                                                                                                                                                        |                                    |                           | 71.0      |
| (0.1 M HCl: MeCN) (1: 9)                                        | Add 5 ml Chloroform, stirring for 10 min with heating at 40 °C, sonication for 10 min with heating at 40 °C, interchangeable between them to accomplish 40 min.        |                                    |                           | 65.8      |
| (1.0 M HCl: MeCN) (1: 9)                                        | Stirring for 10 min with heating at 40 °C, sonication for 10 min with heating at 40 °C, interchangeable between them to accomplish 40 min.                             |                                    |                           | 67.2      |

**Table 3S. Summary of all trials to select the best solvent and method of sample preparation for carvedilol conventional oleogel formula**

| Solvent                  | Method of Preparation                                                                                                                                                             | %Assay |
|--------------------------|-----------------------------------------------------------------------------------------------------------------------------------------------------------------------------------|--------|
| Mobile phase             | Stir using a magnetic stirrer for 10 min, heating at 40 °C, then sonicate for 10 min. The whole time for the preparation was 40 min, which was used interchangeably between them. | 89.9   |
| Acetonitrile             |                                                                                                                                                                                   | 93.5   |
| 10ml THF then MeOH       |                                                                                                                                                                                   | 89.0   |
| Methanol                 |                                                                                                                                                                                   | 90.2   |
| Acetonitrile             | Sonication for 30 min, then stirring using a magnetic stirrer for another 30 min                                                                                                  | 91.1   |
| (0.1 M HCl: MeCN) (1: 9) | Adding 10 ml of MeCN and sonicating for 15min, followed by adding the diluent and sonicating for another 15 min. Then stirring for 30 min.                                        | 95.7   |
| (0.1 M HCl: MeOH) (1: 9) | Adding 10 ml of MeOH and sonicating for 15min, followed by adding the diluent and sonicating for another 15 min. Then stirring for 30 min.                                        | 96.5   |
| (0.1 M HCl: MeOH) (1: 9) | Adding 20 ml of MeOH and sonicating for 15min, followed by adding the diluent and sonicating for another 30 min. Then stirring for 45 min.                                        | 89.0   |
| (0.1 M HCl: MeOH) (3:7)  | Adding 20 ml of MeOH and sonicating for 20 min, followed by adding the diluent and sonicating for another 20 min. Then stirring for 45 min.                                       | 95.2   |
| Mobile phase             | Sonicate for 20 min, then complete the volume with diluent. Transfer the solution to prep tubes and mix for 45 min at 5000 rpm using the Distek PrepEngine instrument.            | 96.3   |
| (0.1 M HCl: MeOH) (1: 9) |                                                                                                                                                                                   | 94.7   |
| (0.1 M HCl: MeOH) (1: 9) | Add 5 ml Chloroform, stirring for 10 min with heating at 40 °C, sonication for 10 min with heating at 40 °C, and then interchange between them to accomplish 40 min               | 94.5   |
| (1.0 M HCl: MeCN) (1: 9) | stirring for 10 min with heating at 40 °C, sonication for 10 min with heating at 40 °C, and then alternating between them to accomplish 40 min                                    | 97.3   |

**Table 4S. Summary results for the investigated formula of CARV-MEOG**

| Name of formula              | Assay (%) |
|------------------------------|-----------|
| Carvedilol: Transcutol       | 98.9      |
| Carvedilol: Tween 20         | 96.7      |
| CARV-MEOG without tween 20   | 94.8      |
| CARV-MEOG without transcutol | 100.0     |

**Table 5S. Results of system suitability for assay test**

| <b>Concentration<br/>(mg/ml)</b> | <b>0.0250</b>                  |                      |                           |                                   |
|----------------------------------|--------------------------------|----------------------|---------------------------|-----------------------------------|
| <b>Injection Number</b>          | <b>R<sub>t</sub><br/>(min)</b> | <b>Standard Area</b> | <b>Asymmetry<br/>(EP)</b> | <b>Number of Plates<br/>(USP)</b> |
| 1                                | 3.48                           | 23.823               | 1.0                       | 11481                             |
| 2                                | 3.47                           | 23.781               | 1.0                       | 11357                             |
| 3                                | 3.47                           | 23.831               | 1.0                       | 11310                             |
| 4                                | 3.46                           | 23.857               | 1.0                       | 11321                             |
| 5                                | 3.46                           | 23.863               | 1.0                       | 11259                             |
| 6                                | 3.46                           | 23.868               | 1.0                       | 11265                             |
| 7                                | 3.46                           | 23.790               | 1.0                       | 11265                             |
| 8                                | 3.45                           | 23.871               | 1.0                       | 11233                             |
| 9                                | 3.45                           | 23.888               | 1.0                       | 11278                             |
| 10                               | 3.45                           | 23.900               | 1.0                       | 11253                             |
| <b>Average</b>                   | <b>3.46</b>                    | <b>23.847</b>        | <b>1.0</b>                | <b>11302</b>                      |
| <b>RSD%</b>                      | <b>-</b>                       | <b>0.17</b>          | <b>-</b>                  | <b>-</b>                          |



**Table 6S. Results of system suitability for dissolution test**

| <b>Concentration<br/>(mg/ml)</b> | <b>0.0280</b>                  |                          |                           |                                   |
|----------------------------------|--------------------------------|--------------------------|---------------------------|-----------------------------------|
| <b>Injection Number</b>          | <b>R<sub>t</sub><br/>(min)</b> | <b>Standard<br/>Area</b> | <b>Asymmetry<br/>(EP)</b> | <b>Number of Plates<br/>(USP)</b> |
| 1                                | 3.37                           | 188.815                  | 1.2                       | 5744                              |
| 2                                | 3.37                           | 188.540                  | 1.2                       | 5748                              |
| 3                                | 3.37                           | 188.452                  | 1.2                       | 5752                              |
| 4                                | 3.37                           | 188.400                  | 1.2                       | 5756                              |
| 5                                | 3.36                           | 188.299                  | 1.2                       | 5756                              |
| 6                                | 3.36                           | 188.615                  | 1.2                       | 5746                              |
| 7                                | 3.36                           | 188.547                  | 1.2                       | 5744                              |
| 8                                | 3.36                           | 188.292                  | 1.2                       | 5755                              |
| 9                                | 3.36                           | 188.143                  | 1.2                       | 5761                              |
| 10                               | 3.36                           | 188.143                  | 1.2                       | 5760                              |
| <b>Average</b>                   | <b>3.36</b>                    | <b>188.425</b>           | <b>1.2</b>                | <b>5752</b>                       |
| <b>RSD%</b>                      | <b>-</b>                       | <b>0.11</b>              | <b>-</b>                  | <b>-</b>                          |

**Table 7S. Summary for linearity test results for assay test over the range (0.013-0.030) mg/ml**

| Level (%) | Concentration (mg/ml) | Area   | RSD%  | Average |
|-----------|-----------------------|--------|-------|---------|
| 50        | 0.013                 | 11.198 | 0.062 | 11.205  |
|           |                       | 11.211 |       |         |
|           |                       | 11.207 |       |         |
| 80        | 0.020                 | 17.938 | 0.026 | 17.939  |
|           |                       | 17.935 |       |         |
|           |                       | 17.944 |       |         |
| 90        | 0.023                 | 20.057 | 0.036 | 20.051  |
|           |                       | 20.053 |       |         |
|           |                       | 20.043 |       |         |
| 100       | 0.025                 | 22.445 | 0.027 | 22.438  |
|           |                       | 22.435 |       |         |
|           |                       | 22.434 |       |         |
| 110       | 0.028                 | 24.660 | 0.041 | 24.668  |
|           |                       | 24.680 |       |         |
|           |                       | 24.666 |       |         |
| 120       | 0.030                 | 26.715 | 0.078 | 26.703  |
|           |                       | 26.715 |       |         |
|           |                       | 26.679 |       |         |

**Table 8S. Summary of the results of the linearity test for the assay test from the calibration curve equation**

| Assay Test                                     |        |                     |        |        |        |        |
|------------------------------------------------|--------|---------------------|--------|--------|--------|--------|
| Level (%)                                      | 50     | 80                  | 90     | 100    | 110    | 120    |
| Concentration (mg/ml)                          | 0.013  | 0.020               | 0.023  | 0.025  | 0.028  | 0.030  |
| Area <sup>(1)</sup>                            | 11.205 | 17.939              | 20.051 | 22.438 | 24.668 | 26.703 |
| Parameter                                      |        | Acceptance criteria |        |        | Result |        |
| Y- Intercept at target concentration           |        | NMT 5.0%            |        |        | 0.443  |        |
| coefficient of determination (R <sup>2</sup> ) |        | ≥ 0.999             |        |        | 1      |        |
| Y-Intercept                                    |        | -                   |        |        | 0.099  |        |
| Slope                                          |        | -                   |        |        | 887.11 |        |

<sup>(1)</sup> The area is the average of three replicate injections.

**Table 9S. Summary of the results of the linearity test for dissolution test over the range (0.00021-0.034) mg/ml**

| <b>Level (%)</b> | <b>Concentration (mg/ml)</b> | <b>Area</b> | <b>RSD%</b> | <b>Average</b> |
|------------------|------------------------------|-------------|-------------|----------------|
| <b>1</b>         | 0.00021                      | 2.185       | 0.104       | 2.183          |
|                  |                              | 2.181       |             |                |
|                  |                              | 2.182       |             |                |
| <b>10</b>        | 0.003                        | 25.934      | 0.029       | 25.926         |
|                  |                              | 25.924      |             |                |
|                  |                              | 25.920      |             |                |
| <b>20</b>        | 0.006                        | 51.651      | 0.023       | 51.644         |
|                  |                              | 51.651      |             |                |
|                  |                              | 51.631      |             |                |
| <b>30</b>        | 0.008                        | 77.144      | 0.020       | 77.134         |
|                  |                              | 77.142      |             |                |
|                  |                              | 77.116      |             |                |
| <b>50</b>        | 0.014                        | 123.441     | 0.049       | 123.375        |
|                  |                              | 123.365     |             |                |
|                  |                              | 123.321     |             |                |
| <b>80</b>        | 0.022                        | 190.304     | 0.017       | 190.293        |
|                  |                              | 190.257     |             |                |
|                  |                              | 190.319     |             |                |
| <b>100</b>       | 0.028                        | 222.222     | 0.021       | 222.170        |
|                  |                              | 222.157     |             |                |
|                  |                              | 222.130     |             |                |
| <b>120</b>       | 0.034                        | 252.297     | 0.052       | 252.149        |
|                  |                              | 252.108     |             |                |
|                  |                              | 252.043     |             |                |

**Table 10S. Summary of the results of the linearity test for the dissolution test from the calibration curve equation**

| <b>Dissolution Test</b>                        |          |           |           |                            |           |           |               |            |
|------------------------------------------------|----------|-----------|-----------|----------------------------|-----------|-----------|---------------|------------|
| <b>Level (%)</b>                               | <b>1</b> | <b>10</b> | <b>20</b> | <b>30</b>                  | <b>50</b> | <b>80</b> | <b>100</b>    | <b>120</b> |
| <b>Concentration (mg/ml)</b>                   | 0.00021  | 0.003     | 0.006     | 0.008                      | 0.014     | 0.022     | 0.028         | 0.034      |
| <b>Area<sup>(1)</sup></b>                      | 2.183    | 25.926    | 51.644    | 77.134                     | 123.375   | 190.293   | 222.17        | 252.149    |
| <b>Parameter</b>                               |          |           |           | <b>Acceptance criteria</b> |           |           | <b>Result</b> |            |
| Y- Intercept at target concentration           |          |           |           | NMT 5.0%                   |           |           | 3.9           |            |
| coefficient of determination (R <sup>2</sup> ) |          |           |           | ≥ 0.98                     |           |           | 0.99          |            |
| Y-Intercept                                    |          |           |           | -                          |           |           | 8.7009        |            |
| Slope                                          |          |           |           | -                          |           |           | 7590          |            |

<sup>(1)</sup> The area is the average of three replicate injections.

**Table 11S. The results of the precision test**

| <b>Concentration of STD (mg/ml)</b>     |                              | 0.025                        | <b>Area of STD</b> | 23.5627          |
|-----------------------------------------|------------------------------|------------------------------|--------------------|------------------|
| <b>Sample #</b>                         | <b>weight of sample (mg)</b> | <b>Concentration (mg/ml)</b> | <b>Area</b>        | <b>Assay (%)</b> |
| 1                                       | 106.05                       | 0.0265                       | 24.8985            | 99.7             |
| 2                                       | 102.73                       | 0.0257                       | 24.4789            | 101.1            |
| 3                                       | 106.78                       | 0.0267                       | 25.1159            | 99.8             |
| 4                                       | 102.56                       | 0.0256                       | 24.1966            | 100.3            |
| 5                                       | 102.37                       | 0.0256                       | 24.0690            | 99.8             |
| 6                                       | 103.12                       | 0.0258                       | 24.0712            | 99.0             |
| <b>Average of Assay (6 samples) (%)</b> |                              |                              |                    | <b>99.9</b>      |
| <b>RSD (%)</b>                          |                              |                              |                    | 0.69             |

**Table 12S. The results of ruggedness test**

|                                         |                              |                              |                    |                  |
|-----------------------------------------|------------------------------|------------------------------|--------------------|------------------|
| <b>Concentration of STD (mg/ml)</b>     |                              | 0.025                        | <b>Area of STD</b> | 23.7438          |
| <b>Sample #</b>                         | <b>weight of sample (mg)</b> | <b>Concentration (mg/ml)</b> | <b>Area</b>        | <b>Assay (%)</b> |
| 1                                       | 98.4                         | 0.0266                       | 24.8169            | 98.2             |
| 2                                       | 101.1                        | 0.0261                       | 25.0638            | 101.1            |
| 3                                       | 100.5                        | 0.0258                       | 24.5858            | 100.7            |
| 4                                       | 102.0                        | 0.0266                       | 25.7964            | 102.1            |
| 5                                       | 100.7                        | 0.0264                       | 25.2886            | 100.9            |
| 6                                       | 100.1                        | 0.0252                       | 24.0093            | 100.3            |
| <b>Average of Assay (6 samples) (%)</b> |                              |                              |                    | <b>100.5</b>     |
| <b>RSD (%)</b>                          |                              |                              |                    | <b>1.2</b>       |

**Table 13S. Summary for the results of precision and ruggedness tests**

| <b>Sample number</b>             | <b>Results for Precision (%)</b> | <b>Results for Ruggedness (%)</b> |
|----------------------------------|----------------------------------|-----------------------------------|
| 1                                | 99.7                             | 98.2                              |
| 2                                | 101.1                            | 101.1                             |
| 3                                | 99.8                             | 100.7                             |
| 4                                | 100.3                            | 102.1                             |
| 5                                | 99.8                             | 100.9                             |
| 6                                | 99.0                             | 100.3                             |
| <b>RSD (%)</b>                   | 0.70                             | 1.2                               |
| <b>Average of 6 samples (%)</b>  | <b>100.0</b>                     | <b>100.5</b>                      |
| <b>Average of 12 Samples (%)</b> | <b>100.3</b>                     |                                   |
| <b>RSD% between two analyses</b> | <b>1.0</b>                       |                                   |

**Table 14S. Results of the precision test for the dissolution test**

| <b>Time<br/>(h)</b> | <b>Release (%)</b> |                 |                 |                 |                 |                 |                                |                    |
|---------------------|--------------------|-----------------|-----------------|-----------------|-----------------|-----------------|--------------------------------|--------------------|
|                     | <b>Vessel-1</b>    | <b>Vessel-2</b> | <b>Vessel-3</b> | <b>Vessel-4</b> | <b>Vessel-5</b> | <b>Vessel-6</b> | <b>Average<br/>(% Release)</b> | <b>RSD<br/>(%)</b> |
| 0.5                 | 14.5               | 14.8            | 16.0            | 17.1            | 17.5            | 16.0            | 16.0                           | 6.8                |
| 1                   | 20.7               | 21.1            | 23.0            | 23.8            | 23.7            | 25.7            | 23.0                           | 7.4                |
| 2                   | 28.3               | 29.9            | 31.9            | 33.5            | 33.5            | 35.7            | 32.1                           | 7.6                |
| 4                   | 39.7               | 41.4            | 44.4            | 46.3            | 46.9            | 44.4            | 43.9                           | 5.8                |
| 6                   | 50.7               | 50.9            | 52.9            | 55.0            | 56.9            | 61.4            | 54.6                           | 6.8                |
| 8                   | 60.0               | 60.4            | 59.7            | 62.2            | 65.7            | 67.9            | 62.7                           | 5.0                |
| 10                  | 71.0               | 73.1            | 73.7            | 74.6            | 76.9            | 77.5            | 74.5                           | 3.0                |
| 12                  | 80.6               | 83.3            | 83.0            | 84.0            | 83.7            | 82.8            | 82.9                           | 1.3                |
| 16                  | 92.7               | 95.3            | 98.0            | 93.9            | 98.5            | 95.3            | 95.6                           | 2.2                |
| 18                  | 97.2               | 97.5            | 97.5            | 96.5            | 97.4            | 95.5            | 96.9                           | 0.8                |
| 20                  | 95.8               | 98.9            | 99.2            | 98.0            | 99.6            | 99.3            | 98.5                           | 1.3                |
| 22                  | 98.8               | 100.3           | 101.3           | 100.1           | 101.2           | 100.5           | 100.4                          | 0.8                |
| 24                  | 103.9              | 101.6           | 102.1           | 99.0            | 100.2           | 103.5           | 101.7                          | 1.7                |

**Table 15S. Results of the ruggedness test for dissolution test**

| <b>Time<br/>(h)</b> | <b>Release (%)</b> |                 |                 |                 |                 |                 |                                |                    |
|---------------------|--------------------|-----------------|-----------------|-----------------|-----------------|-----------------|--------------------------------|--------------------|
|                     | <b>Vessel-1</b>    | <b>Vessel-2</b> | <b>Vessel-3</b> | <b>Vessel-4</b> | <b>Vessel-5</b> | <b>Vessel-6</b> | <b>Average<br/>(% Release)</b> | <b>RSD<br/>(%)</b> |
| 0.5                 | 15.4               | 15.4            | 15.4            | 18.6            | 18.2            | 18.2            | 16.9                           | 9.6                |
| 1                   | 21.6               | 21.6            | 21.3            | 25.7            | 25.7            | 25.7            | 23.6                           | 9.8                |
| 2                   | 28.5               | 28.5            | 28.3            | 32.5            | 32.5            | 32.5            | 30.5                           | 7.3                |
| 4                   | 46.7               | 36.7            | 43.4            | 46.8            | 43.4            | 43.4            | 43.4                           | 8.5                |
| 6                   | 47.4               | 46.8            | 46.4            | 54.7            | 56.5            | 53.1            | 50.8                           | 8.8                |
| 8                   | 57.8               | 56.5            | 55.3            | 59.4            | 62.4            | 59.7            | 58.5                           | 4.3                |
| 10                  | 69.8               | 68.8            | 67.6            | 67.8            | 69.2            | 73.6            | 69.5                           | 3.2                |
| 12                  | 82.3               | 82.2            | 82.2            | 80.5            | 83.8            | 84.4            | 82.6                           | 1.7                |
| 16                  | 89.3               | 89.2            | 87.2            | 87.4            | 86.4            | 86.1            | 87.6                           | 1.6                |
| 18                  | 89.0               | 93.0            | 93.8            | 93.9            | 92.7            | 88.0            | 91.7                           | 2.8                |
| 20                  | 93.0               | 93.9            | 93.9            | 95.6            | 96.3            | 93.1            | 94.3                           | 1.4                |
| 22                  | 95.0               | 95.0            | 95.0            | 97.9            | 98.8            | 96.7            | 96.4                           | 1.7                |
| 24                  | 99.3               | 99.2            | 103.8           | 100.7           | 98.8            | 98.7            | 100.1                          | 2.0                |

**Table 16S. Summary of the results between precision and ruggedness**

| Time (h) | Release (%)          |                       |                          | Acceptance Criteria                                | RSD (%) |
|----------|----------------------|-----------------------|--------------------------|----------------------------------------------------|---------|
|          | Average of Precision | Average of Ruggedness | Average (for 12 samples) |                                                    |         |
| 0.5      | 16                   | 16.9                  | 16.4                     | RSD $\leq$ 10% at time points %Release <85.0%      | 8.5     |
| 1        | 23                   | 23.6                  | 23.3                     |                                                    | 8.6     |
| 2        | 32.1                 | 30.5                  | 31.3                     |                                                    | 8.0     |
| 4        | 43.9                 | 43.4                  | 43.6                     |                                                    | 7.1     |
| 6        | 54.6                 | 50.8                  | 52.7                     |                                                    | 8.5     |
| 8        | 62.7                 | 58.5                  | 60.6                     |                                                    | 5.9     |
| 10       | 74.5                 | 69.5                  | 72                       |                                                    | 4.7     |
| 12       | 82.9                 | 82.6                  | 82.7                     |                                                    | 1.5     |
| 16       | 95.6                 | 87.6                  | 91.6                     | RSD $\leq$ 5% at time points %Release $\geq$ 85.0% | 5.0     |
| 18       | 96.9                 | 91.7                  | 94.3                     |                                                    | 3.5     |
| 20       | 98.5                 | 94.3                  | 96.4                     |                                                    | 2.6     |
| 22       | 100.4                | 96.4                  | 98.4                     |                                                    | 2.4     |
| 24       | 101.7                | 100.1                 | 100.9                    |                                                    | 2.0     |



**Table 17S. Summary results of accuracy test for assay test over a concentration range (0.0125-0.030) mg/ml**

| Acceptance Criteria               | Individual Recovery for each preparation within level (%) |                                    | 97.0% - 103.0%                 | Average recovery for each level (%) |         | 98.0% - 102.0% |
|-----------------------------------|-----------------------------------------------------------|------------------------------------|--------------------------------|-------------------------------------|---------|----------------|
| Concentration of CARV STD (mg/ml) |                                                           | 0.025                              | Average Area of Carvedilol STD |                                     |         | 22.2558        |
| Level (%)                         | Concentration of CARV (mg/ml)                             | Concentration of Excipient (mg/ml) | Area                           | Recovery (%)                        | RSD (%) | Average (%)    |
| 50                                | 0.0125                                                    | 0.957                              | 10.951                         | 98.9                                | 0.13    | 99.0           |
|                                   | 0.0125                                                    | 0.978                              | 11.041                         | 99.2                                |         |                |
|                                   | 0.0130                                                    | 0.988                              | 11.400                         | 99.0                                |         |                |
| 80                                | 0.0199                                                    | 0.963                              | 17.471                         | 98.8                                | 0.18    | 98.8           |
|                                   | 0.0200                                                    | 0.990                              | 17.563                         | 98.6                                |         |                |
|                                   | 0.0204                                                    | 1.008                              | 17.968                         | 99.0                                |         |                |
| 100                               | 0.0250                                                    | 0.969                              | 21.925                         | 98.9                                | 0.15    | 99.1           |
|                                   | 0.0247                                                    | 0.971                              | 21.779                         | 99.2                                |         |                |
|                                   | 0.0252                                                    | 1.006                              | 22.205                         | 99.1                                |         |                |
| 120                               | 0.0303                                                    | 0.980                              | 26.537                         | 98.7                                | 0.13    | 98.6           |
|                                   | 0.0301                                                    | 1.011                              | 26.426                         | 98.7                                |         |                |
|                                   | 0.0301                                                    | 0.997                              | 26.365                         | 98.5                                |         |                |

**Table 18S. Summary results of accuracy test for dissolution test over a concentration range (0.0028-0.0334) mg/ml**

| Acceptance Criteria                     | Individual Recovery for each preparation within level (%) |                                    | 95.0% - 105.0%                 | Average recovery for each level (%) |         | 95.0% - 105.0% |
|-----------------------------------------|-----------------------------------------------------------|------------------------------------|--------------------------------|-------------------------------------|---------|----------------|
| Concentration of Carvedilol STD (mg/ml) |                                                           | 0.028                              | Average Area of Carvedilol STD |                                     |         | 242.366        |
| Level (%)                               | Concentration of Carvedilol (mg/ml)                       | Concentration of Excipient (mg/ml) | Area                           | Recovery (%)                        | RSD (%) | Average (%)    |
| 10                                      | 0.0028                                                    | 1.086                              | 24.266                         | 100.1                               | 1.9     | 102.3          |
|                                         | 0.0028                                                    | 1.098                              | 25.127                         | 103.7                               |         |                |
|                                         | 0.0028                                                    | 1.083                              | 25.020                         | 103.2                               |         |                |
| 30                                      | 0.0083                                                    | 1.085                              | 72.817                         | 101.3                               | 1.1     | 102.6          |
|                                         | 0.0083                                                    | 1.086                              | 74.129                         | 103.2                               |         |                |
|                                         | 0.0083                                                    | 1.082                              | 74.305                         | 103.4                               |         |                |
| 50                                      | 0.0138                                                    | 1.085                              | 120.799                        | 101.1                               | 0.65    | 101.7          |
|                                         | 0.0138                                                    | 1.073                              | 122.364                        | 102.4                               |         |                |
|                                         | 0.0138                                                    | 1.097                              | 121.462                        | 101.7                               |         |                |
| 80                                      | 0.0221                                                    | 1.113                              | 190.026                        | 99.3                                | 0.46    | 99.8           |
|                                         | 0.0222                                                    | 1.087                              | 192.598                        | 100.2                               |         |                |
|                                         | 0.0222                                                    | 1.099                              | 192.168                        | 100.0                               |         |                |
| 100                                     | 0.0277                                                    | 1.113                              | 239.527                        | 99.9                                | 0.66    | 100.3          |
|                                         | 0.0278                                                    | 1.08                               | 243.262                        | 101.1                               |         |                |
|                                         | 0.0278                                                    | 1.126                              | 240.590                        | 100.0                               |         |                |
| 120                                     | 0.0332                                                    | 1.101                              | 277.884                        | 96.7                                | 0.20    | 96.8           |
|                                         | 0.0334                                                    | 1.107                              | 280.547                        | 97.0                                |         |                |
|                                         | 0.0333                                                    | 1.114                              | 278.759                        | 96.7                                |         |                |

**Table 19S. Results of filter compatibility test for STD and Sample of assay and dissolution tests**

| Acceptance Criteria |                     | Recovery (%): 98.0% - 102.0% |                        |                     |                        |
|---------------------|---------------------|------------------------------|------------------------|---------------------|------------------------|
| Test Name           |                     | Assay test                   |                        | Dissolution test    |                        |
| Type of filter      | Discard volume (ml) | Recovery (%)<br>STD          | Recovery (%)<br>Sample | Recovery (%)<br>STD | Recovery (%)<br>Sample |
| Nylon               | 4                   | 99.9                         | 99.6                   | 47.7                | 63.3                   |
|                     | 8                   | 99.7                         | 99.9                   | 93.9                | 98.3                   |
|                     | 15                  | NS <sup>(1)</sup>            | NS <sup>(1)</sup>      | 99.9                | 99.1                   |
| Glass fiber         | 4                   | 99.2                         | 100.1                  | 100.3               | 97.3                   |
|                     | 8                   | 99.2                         | 100.2                  | 100.6               | 98.3                   |
|                     | 15                  | NS <sup>(1)</sup>            | NS <sup>(1)</sup>      | 100.8               | 99.0                   |
| PTFE                | 4                   | 99.3                         | 99.8                   | NS <sup>(1)</sup>   | NS <sup>(1)</sup>      |
|                     | 8                   | 99.2                         | 100.1                  | NS <sup>(1)</sup>   | NS <sup>(1)</sup>      |
| PVDF                | 4                   | 98.9                         | 100.0                  | NS <sup>(1)</sup>   | NS <sup>(1)</sup>      |
|                     | 8                   | 98.9                         | 100.0                  | NS <sup>(1)</sup>   | NS <sup>(1)</sup>      |
| RC                  | 4                   | 99.7                         | 100.0                  | NS <sup>(1)</sup>   | NS <sup>(1)</sup>      |
|                     | 8                   | 99.9                         | 100.0                  | NS <sup>(1)</sup>   | NS <sup>(1)</sup>      |

<sup>(1)</sup> Not Studied

**Table 20S. Summary of the results of SOAS for STD and sample solutions at RT and 5 °C for assay and dissolution tests**

| Acceptance Criteria |           | Recovery (%): 98.0% - 102.0% |               |                  |             |
|---------------------|-----------|------------------------------|---------------|------------------|-------------|
| Test Name           |           | Assay test                   |               | Dissolution test |             |
| No. of Days         | Condition | % Recovery                   |               | Recovery (%)     |             |
|                     |           | STD                          | Sample        | STD              | Sample      |
| 1 Day               | Fridge    | 100.2%                       | 100.5%        | 100.6            | 99.4        |
|                     | RT        | 101.0%                       | 100.6%        | <b>105.3</b>     | <b>96.6</b> |
| 2 Days              | Fridge    | 100.9%                       | 101.1%        | <b>101.9</b>     | <b>98.5</b> |
|                     | RT        | <b>102.2%</b>                | <b>102.1%</b> | -                | -           |
| 3 Days              | Fridge    | 100.6%                       | 99.2%         | -                | -           |
| 4 Days              | Fridge    | 101.0%                       | 101.3%        | -                | -           |
| 5 Days              | Fridge    | 100.7%                       | 100.5%        | -                | -           |
| 6 Days              | Fridge    | <b>101.3%</b>                | <b>100.5%</b> | -                | -           |

**Table 21S. Summary of results for system suitability test using aged mobile phase**

| Test Name                      |                         | Stability of mobile phase |      |
|--------------------------------|-------------------------|---------------------------|------|
| Standard concentration (mg/ml) |                         | 0.025                     |      |
| Parameters                     | Acceptance Criteria     | Average                   | RSD% |
| R <sub>t</sub> (min)           | -                       | 3.55                      | -    |
| Standard Area                  | RSD: Not more than 2.0% | 23.44                     | 0.04 |
| Asymmetry (EP)                 | 0.8-1.8                 | 0.91                      | -    |
| Number of Plates (USP)         | Not less than 2000      | 13544                     | -    |

**Table 22S. Summary of results of system suitability and the deference between samples in normal system with samples for each parameter changed**

| Changed Parameters                            | R <sub>t</sub><br>(min) | Asymmetry<br>(EP) | Number of<br>Plates<br>(USP) | RSD <sup>(1)</sup><br>(%) | RSD <sup>(2)</sup><br>(%) |
|-----------------------------------------------|-------------------------|-------------------|------------------------------|---------------------------|---------------------------|
| <b>Normal</b>                                 | <b>3.39</b>             | <b>0.90</b>       | <b>12449</b>                 | <b>0.05</b>               | <b>-</b>                  |
| Change Column (Ace C18 (250*4.6) mm, 5µm)     | 3.48                    | 1.06              | 14808                        | 0.03                      | 0.37                      |
| Increase Flow Rate to 1.40 ml/min             | 2.92                    | 0.87              | 11126                        | 0.13                      | 0.34                      |
| Decrease flow rate to 1.0 ml/min              | 4.21                    | 1.12              | 7772                         | 0.21                      | 0.82                      |
| Wavelength minus (238nm)                      | 3.39                    | 0.89              | 12103                        | 0.12                      | 0.37                      |
| Wavelength plus (242nm)                       | 3.39                    | 0.88              | 12095                        | 0.05                      | 0.41                      |
| Raise column oven to 40 °C                    | 3.33                    | 0.87              | 11767                        | 0.04                      | 0.45                      |
| Minimize column oven to 30 °C                 | 3.45                    | 0.91              | 12201                        | 0.08                      | 0.52                      |
| Decrease time preparation of sample           | 3.39                    | 0.88              | 11982                        | 0.03                      | 1.44                      |
| Decrease pH of Buffer for mobile phase to 2.5 | 3.51                    | 0.91              | 13906                        | 0.03                      | 0.47                      |
| Increase pH of Buffer for mobile phase to 2.9 | 3.54                    | 0.93              | 13502                        | 0.05                      | 0.47                      |
| Organic solvent increase with 5%              | 3.27                    | 1.20              | 6247                         | 0.05                      | 0.42                      |
| Organic solvent reduced by 5%                 | 4.06                    | 1.08              | 7075                         | 0.03                      | 0.42                      |

<sup>(1)</sup> The RSD% was calculated for the standard system suitability for each parameter. Acceptance criteria: as in system suitability test.

<sup>(2)</sup> The RSD% was calculated for the % Amount of carvedilol with normal system (samples in normal system with samples for each changed parameter). Acceptance criteria: RSD ≤ 2.0%.

**Table 23S. Summary of results for acidic hydrolysis of CARV-MEOG.**

| <b>Stress Condition</b>         | <b>Rt for Impurity (min)</b> | <b>RRT</b> | <b>% Impurity</b> | <b>%Area of CARV after degradation</b> | <b>% Degradation of Carvedilol</b> | <b>Peak Match</b> |
|---------------------------------|------------------------------|------------|-------------------|----------------------------------------|------------------------------------|-------------------|
| <b>0.1 M HCl at RT , 1 h</b>    | No degradation               |            |                   | 100.0                                  | 0.0                                | 1000              |
| <b>0.1 M HCl at 70 °C, 1 h</b>  | No degradation               |            |                   | 100.0                                  | 0.0                                | 1000              |
| <b>1M HCl at RT, 1 h</b>        | No degradation               |            |                   | 100.0                                  | 0.0                                | 1000              |
| <b>1 M HCl at 70 °C, 1 h</b>    | No degradation               |            |                   | 100.0                                  | 0.0                                | 1000              |
| <b>0.1 M HCl at 70 °C, 24 h</b> | 3.0                          | 0.9        | 0.27              | 99.2                                   | 0.8                                | 986               |
|                                 | 5.5                          | 1.6        | 0.06              |                                        |                                    |                   |
|                                 | 7.4                          | 2.2        | 0.04              |                                        |                                    |                   |
|                                 | 7.9                          | 2.4        | 0.09              |                                        |                                    |                   |
|                                 | 13.0                         | 3.9        | 0.54              |                                        |                                    |                   |
| <b>0.5 M HCl at 70 °C, 24 h</b> | 2.9                          | 0.9        | 0.39              | 99.0                                   | 1.0                                | 989               |
|                                 | 3.1                          | 0.9        | 0.12              |                                        |                                    |                   |
|                                 | 4.2                          | 1.2        | 0.41              |                                        |                                    |                   |
|                                 | 7.9                          | 2.3        | 0.20              |                                        |                                    |                   |
| <b>1.0 M HCl at 70 °C, 24 h</b> | 3.0                          | 0.9        | 0.29              | 99.0                                   | 1.0                                | 986               |
|                                 | 3.1                          | 0.9        | 0.03              |                                        |                                    |                   |
|                                 | 4.2                          | 1.3        | 0.69              |                                        |                                    |                   |
|                                 | 7.9                          | 2.3        | 0.13              |                                        |                                    |                   |
| <b>2.0 M HCl at 70 °C, 24 h</b> | 1.8                          | 0.5        | 0.19              | 98.5                                   | 1.5                                | 991               |
|                                 | 2.9                          | 0.9        | 0.28              |                                        |                                    |                   |
|                                 | 4.2                          | 1.2        | 1.13              |                                        |                                    |                   |
|                                 | 5.2                          | 1.6        | 0.18              |                                        |                                    |                   |
| <b>1 M HCl at RT, 8 h</b>       | No degradation               |            |                   | 100.0                                  | 0.0                                | 997               |
| <b>1 M HCl at 85 °C, 8 h</b>    | 2.1                          | 0.6        | 0.14              | 99.1                                   | 0.9                                | 974               |
|                                 | 2.2                          | 0.7        | 0.12              |                                        |                                    |                   |
|                                 | 2.4                          | 0.7        | 0.10              |                                        |                                    |                   |
|                                 | 2.9                          | 0.9        | 0.21              |                                        |                                    |                   |
|                                 | 4.0                          | 1.2        | 0.31              |                                        |                                    |                   |
| <b>2 M HCl at RT, 6 h</b>       | No degradation               |            |                   | 100.0                                  | 0.0                                | 989               |
| <b>2 M HCl at 85 °C, 6 h</b>    | 7.1                          | 2.1        | 0.16              | 99.4                                   | 0.6                                | 1000              |
| <b>4 M HCl at RT, 4 h</b>       | 1.7                          | 0.5        | 0.25              | 98.8                                   | 1.2                                | 997               |
|                                 | 1.7                          | 0.5        | 0.26              |                                        |                                    |                   |
|                                 | 4.1                          | 1.2        | 0.62              |                                        |                                    |                   |
| <b>4 M HCl at 85 °C, 4 h</b>    | 7.2                          | 2.1        | 0.18              | 99.3                                   | 0.7                                | 1000              |
| <b>6 M HCl at 85 °C, 1 h</b>    | 1.7                          | 0.5        | 0.09              | 99.5                                   | 0.5                                | 988               |
|                                 | 1.7                          | 0.5        | 0.11              |                                        |                                    |                   |
|                                 | 2.1                          | 0.6        | 0.07              |                                        |                                    |                   |
|                                 | 4.2                          | 1.2        | 0.07              |                                        |                                    |                   |
|                                 | 7.3                          | 2.2        | 0.04              |                                        |                                    |                   |

**Table 24S. Summary of results for acidic hydrolysis of CARV.**

| <b>Stress Condition</b>         | <b>Rt for Impurity (min)</b> | <b>RRT of Impurity</b> | <b>% Impurity</b> | <b>% Area of CARV after degradation</b> | <b>% Degradation of CARV</b> | <b>Peak Match</b> |
|---------------------------------|------------------------------|------------------------|-------------------|-----------------------------------------|------------------------------|-------------------|
| <b>0.1 M HCl at RT , 1 h</b>    | No degradation               |                        |                   | 100                                     | 0.0                          | 1000              |
| <b>0.1 M HCl at 70 °C, 1 h</b>  | No degradation               |                        |                   | 100                                     | 0.0                          | 1000              |
| <b>1M HCl at RT, 1 h</b>        | No degradation               |                        |                   | 100                                     | 0.0                          | 1000              |
| <b>1 M HCl at 70 °C, 1 h</b>    | No degradation               |                        |                   | 100                                     | 0.0                          | 1000              |
| <b>0.1 M HCl at 70 °C, 24 h</b> | 1.8                          | 0.6                    | 0.01              | 99.9                                    | 0.1                          | 986               |
|                                 | 2.2                          | 0.7                    | 0.03              |                                         |                              |                   |
|                                 | 2.8                          | 0.9                    | 0.03              |                                         |                              |                   |
|                                 | 4.4                          | 1.4                    | 0.00              |                                         |                              |                   |
| <b>0.5 M HCl at 70 °C, 24 h</b> | 2.1                          | 0.6                    | 0.02              | 99.9                                    | 0.1                          | 985               |
|                                 | 3.0                          | 0.9                    | 0.10              |                                         |                              |                   |
| <b>1.0 M HCl at 70 °C, 24 h</b> | 2.8                          | 0.9                    | 0.03              | 99.8                                    | 0.2                          | 986               |
|                                 | 6.7                          | 0.5                    | 0.06              |                                         |                              |                   |
|                                 | 11.7                         | 0.4                    | 0.05              |                                         |                              |                   |
| <b>2.0 M HCl at 70 °C, 24 h</b> | 6.7                          | 2.1                    | 0.14              | 99.8                                    | 0.2                          | 987               |
|                                 | 11.7                         | 3.6                    | 0.05              |                                         |                              |                   |
| <b>1 M HCl at RT, 8 h</b>       | No degradation               |                        |                   | 97.3                                    | 2.7                          | 977               |
| <b>1 M HCl at 85 °C, 8 h</b>    | 3.0                          | 0.9                    | 0.05              | 99.7                                    | 0.3                          | 973               |
|                                 | 7.2                          | 2.2                    | 0.25              |                                         |                              |                   |
| <b>2 M HCl at RT, 6 h</b>       | No degradation               |                        |                   | 100.0                                   | 0.0                          | 989               |
| <b>2 M HCl at 85 °C, 6 h</b>    | 7.2                          | 2.1                    | 0.21              | 99.6                                    | 0.4                          | 998               |
| <b>4 M HCl at RT, 4 h</b>       | No degradation               |                        |                   | 100.0                                   | 0.0                          | 976               |
| <b>4 M HCl at 85 °C, 4 h</b>    | 3.0                          | 0.9                    | 0.06              | 98.8                                    | 1.2                          | 987               |
|                                 | 3.2                          | 1.0                    | 0.10              |                                         |                              |                   |
|                                 | 7.2                          | 2.1                    | 0.48              |                                         |                              |                   |
|                                 | 21.0                         | 6.2                    | 0.27              |                                         |                              |                   |
| <b>6 M HCl at 85 °C, 1 h</b>    | 1.7                          | 0.5                    | 0.05              | 97.3                                    | 2.7                          | 997               |
|                                 | 1.8                          | 0.5                    | 0.02              |                                         |                              |                   |
|                                 | 2.0                          | 0.6                    | 0.08              |                                         |                              |                   |
|                                 | 2.3                          | 0.6                    | 0.02              |                                         |                              |                   |
|                                 | 3.3                          | 0.9                    | 0.02              |                                         |                              |                   |
|                                 | 7.3                          | 2.1                    | 0.09              |                                         |                              |                   |
|                                 | 14.3                         | 4.1                    | 1.36              |                                         |                              |                   |

**Table 25S. Summary of results for acidic hydrolysis of excipient components.**

| <b>Stress Condition</b>         | <b>Rt for Impurity (min)</b> | <b>Rt of Carvedilol (min)</b> | <b>RRT</b> | <b>% Impurity</b> | <b>% Degradation of Carvedilol</b> | <b>Peak Match</b> |
|---------------------------------|------------------------------|-------------------------------|------------|-------------------|------------------------------------|-------------------|
| <b>0.1 M HCl at RT , 1 h</b>    | No degradation               |                               |            |                   | N.A                                | N.A               |
| <b>0.1 M HCl at 70 °C, 1 h</b>  | No degradation               |                               |            |                   | N.A                                | N.A               |
| <b>1M HCl at RT, 1 h</b>        | 1.86                         | -                             | 0.53       | 1.47              | N.A                                | N.A               |
| <b>1 M HCl at 70 °C, 1 h</b>    | 1.863                        | -                             | 0.53       | 1.53              | N.A                                | N.A               |
| <b>0.1 M HCl at 70 °C, 24 h</b> | No degradation products      |                               |            |                   | N.A                                | N.A               |
| <b>0.5 M HCl at 70 °C, 24 h</b> | No degradation products      |                               |            |                   | N.A                                | N.A               |
| <b>1.0 M HCl at 70 °C, 24 h</b> | No degradation products      |                               |            |                   | N.A                                | N.A               |
| <b>2.0 M HCl at 70 °C, 24 h</b> | No degradation products      |                               |            |                   | N.A                                | N.A               |
| <b>1 M HCl at RT, 8 h</b>       | No degradation products      |                               |            |                   | N.A                                | N.A               |
| <b>1 M HCl at 85 °C, 8 h</b>    | No degradation products      |                               |            |                   | N.A                                | N.A               |
| <b>2 M HCl at RT, 6 h</b>       | No degradation products      |                               |            |                   | N.A                                | N.A               |
| <b>2 M HCl at 85 °C, 6 h</b>    | No degradation products      |                               |            |                   | N.A                                | N.A               |
| <b>4 M HCl at RT, 4 h</b>       | No degradation products      |                               |            |                   | N.A                                | N.A               |
| <b>4 M HCl at 85 °C, 4 h</b>    | No degradation products      |                               |            |                   | N.A                                | N.A               |
| <b>6 M HCl at 85 °C, 1 h</b>    | No degradation products      |                               |            |                   | N.A                                | N.A               |



**Table 26S. Summary of results for basic hydrolysis of CARV-MEOG.**

| <b>Stress Condition</b>        | <b>Rt for Impurity (min)</b> | <b>RRT</b> | <b>% Impurity</b> | <b>% Degradation of Carvedilol</b> | <b>Peak Match</b> |
|--------------------------------|------------------------------|------------|-------------------|------------------------------------|-------------------|
| <b>1 M NaOH at RT, 8 h</b>     | 13.93                        | 4.24       | 2.62              | 4.7                                | 977               |
| <b>1 M NaOH at 85 °C, 8 h</b>  | 1.98                         | 0.60       | 0.82              | 26.6                               | 988               |
|                                | 12.33                        | 3.71       | 0.22              |                                    |                   |
|                                | 13.93                        | 4.19       | 5.58              |                                    |                   |
| <b>2 M NaOH at RT, 6 h</b>     | 1.98                         | 0.60       | 0.72              | 17.2                               | 984               |
|                                | 2.28                         | 0.69       | 0.27              |                                    |                   |
|                                | 12.36                        | 3.72       | 0.21              |                                    |                   |
|                                | 13.93                        | 4.20       | 7.03              |                                    |                   |
| <b>2 M NaOH at 85 °C, 6 h</b>  | 1.98                         | 0.59       | 0.73              | 36.4                               | 993               |
|                                | 2.28                         | 0.68       | 0.26              |                                    |                   |
|                                | 12.33                        | 3.68       | 0.15              |                                    |                   |
|                                | 13.94                        | 4.15       | 5.45              |                                    |                   |
| <b>4 M NaOH at RT, 4 h</b>     | 1.98                         | 0.59       | 0.46              | 44.2                               | 996               |
|                                | 2.29                         | 0.68       | 0.48              |                                    |                   |
|                                | 13.93                        | 4.14       | 3.85              |                                    |                   |
| <b>4 M NaOH at 85 °C, 4 h</b>  | 1.98                         | 0.59       | 0.45              | 50.6                               | 997               |
|                                | 2.29                         | 0.68       | 0.57              |                                    |                   |
|                                | 13.94                        | 4.14       | 2.91              |                                    |                   |
| <b>6 M NaOH at 85 °C, 1 h</b>  | 1.95                         | 0.58       | 0.59              | 17.4                               | 987               |
|                                | 2.28                         | 0.68       | 0.58              |                                    |                   |
|                                | 12.36                        | 3.67       | 0.15              |                                    |                   |
|                                | 13.97                        | 4.14       | 1.52              |                                    |                   |
| <b>1 M NaOH at 85 °C, 14 h</b> | 2.00                         | 0.56       | 1.09              | 86.4                               | 995               |
|                                | 2.30                         | 0.65       | 0.17              |                                    |                   |
|                                | 4.13                         | 1.16       | 0.33              |                                    |                   |
|                                | 4.79                         | 1.35       | 0.14              |                                    |                   |
|                                | 7.43                         | 2.09       | 0.13              |                                    |                   |
|                                | 15.08                        | 4.24       | 11.74             |                                    |                   |

**Table 27S. Summary of results for basic hydrolysis of carvedilol.**

| <b>Stress Condition</b>        | <b>Rt for Impurity (min)</b> | <b>RRT</b> | <b>% Impurity</b> | <b>% Degradation of Carvedilol</b> | <b>Peak Match</b> |
|--------------------------------|------------------------------|------------|-------------------|------------------------------------|-------------------|
| <b>1 M NaOH at RT, 9 h</b>     | 13.94                        | 4.26       | 1.44              | 1.5                                | 971               |
| <b>1 M NaOH at 85 °C, 9 h</b>  | 2.28                         | 0.69       | 0.21              | 13.0                               | 978               |
|                                | 13.94                        | 4.23       | 11.95             |                                    |                   |
| <b>2 M NaOH at RT, 6 h</b>     | 1.99                         | 0.60       | 0.14              | 14.7                               | 986               |
|                                | 13.94                        | 4.21       | 1.56              |                                    |                   |
| <b>2 M NaOH at 85 °C, 6 h</b>  | 1.99                         | 0.60       | 0.87              | 5.1                                | 980               |
|                                | 13.95                        | 4.22       | 7.89              |                                    |                   |
| <b>4 M NaOH at RT, 4 h</b>     | 1.98                         | 0.60       | 0.13              | 1.3                                | 972               |
|                                | 4.35                         | 1.32       | 0.14              |                                    |                   |
|                                | 13.95                        | 4.24       | 0.20              |                                    |                   |
| <b>4 M NaOH at 85 °C, 4 h</b>  | 1.98                         | 0.60       | 0.77              | 19.1                               | 965               |
|                                | 2.31                         | 0.70       | 0.89              |                                    |                   |
|                                | 13.96                        | 4.25       | 2.16              |                                    |                   |
| <b>6 M NaOH at 85 °C, 1 h</b>  | 1.86                         | 0.53       | 2.06              | 27.2                               | 996               |
|                                | 13.98                        | 4.01       | 1.09              |                                    |                   |
| <b>1 M NaOH at 85 °C, 14 h</b> | 2.00                         | 0.55       | 1.03              | 80.41                              | 994               |
|                                | 2.30                         | 0.64       | 0.28              |                                    |                   |
|                                | 4.22                         | 1.17       | 0.16              |                                    |                   |
|                                | 5.49                         | 1.52       | 0.04              |                                    |                   |
|                                | 15.06                        | 4.17       | 18.08             |                                    |                   |

**Table 28S. Summary of results for basic hydrolysis of excipients.**

| Stress Condition       | Rt for Impurity (min) | RRT  | % Impurity | % Degradation of Carvedilol | Peak Match |
|------------------------|-----------------------|------|------------|-----------------------------|------------|
| 1 M NaOH at RT, 9 h    | No Degradation        |      |            | N.A                         | N.A        |
| 1 M NaOH at 85 °C, 9 h | 1.98                  | 0.55 | 0.29       | N.A                         | N.A        |
|                        | 2.27                  | 0.63 | 0.05       |                             |            |
| 2 M NaOH at RT, 6 h    | 1.98                  | 0.55 | 0.06       | N.A                         | N.A        |
| 2 M NaOH at 85 °C, 6 h | 1.98                  | 0.55 | 0.04       | N.A                         | N.A        |
| 4 M NaOH at RT, 4 h    | 1.98                  | 0.55 | 0.05       | N.A                         | N.A        |
|                        | 3.48                  | 0.97 | 0.02       |                             |            |
| 4 M NaOH at 85 °C, 4 h | 1.98                  | 0.55 | 0.05       | N.A                         | N.A        |
|                        | 3.48                  | 0.97 | 0.01       |                             |            |

**Table 29S. Summary of results for neutral hydrolysis for CARV-MEOG.**

| Stress Condition                    | Rt for Impurity (min) | RRT | % Impurity | % Area of CARV after degradation | % Degradation of CARV | Peak Match |
|-------------------------------------|-----------------------|-----|------------|----------------------------------|-----------------------|------------|
| H <sub>2</sub> O at 85 °C, for 4 h  | 2.127                 | 0.6 | 0.1        | 98.9                             | 1.1                   | 974        |
|                                     | 12.614                | 3.8 | 0.5        |                                  |                       |            |
| H <sub>2</sub> O at 85 °C, for 8 h  | 2.119                 | 0.6 | 0.2        | 99.2                             | 0.8                   | 978        |
|                                     | 12.625                | 3.8 | 0.7        |                                  |                       |            |
| H <sub>2</sub> O at 85 °C, for 24 h | 0.63                  | 0.2 | 0.2        | 98.6                             | 1.4                   | 996        |
|                                     | 1.17                  | 0.3 | 0.3        |                                  |                       |            |
|                                     | 1.56                  | 0.5 | 0.1        |                                  |                       |            |
|                                     | 2.12                  | 0.6 | 0.1        |                                  |                       |            |
|                                     | 3.68                  | 1.1 | 0.6        |                                  |                       |            |
|                                     | 4.13                  | 1.2 | 0.1        |                                  |                       |            |

**Table 30S. Summary of results for neutral hydrolysis for CARV.**

| Stress Condition                    | Rt for Impurity (min) | RRT | % Impurity | % Area of CARV after degradation | % Degradation of CARV | Peak Match |
|-------------------------------------|-----------------------|-----|------------|----------------------------------|-----------------------|------------|
| H <sub>2</sub> O at 85 °C, for 4 h  | No degradation        |     |            | 98.9                             | 0.0                   | 975        |
| H <sub>2</sub> O at 85 °C, for 8 h  | No degradation        |     |            | 100.0                            | 0.0                   | 990        |
| H <sub>2</sub> O at 85 °C, for 24 h | No degradation        |     |            | 100.0                            | 0.0                   | 991        |

**Table 31S. Summary of results for neutral hydrolysis for excipient.**

| Stress Condition                    | Rt for Impurity (min) | RRT | % Impurity | % Degradation of Carvedilol | Peak Match |
|-------------------------------------|-----------------------|-----|------------|-----------------------------|------------|
| H <sub>2</sub> O at 85 °C, for 4 h  | No degradation        |     |            |                             | -          |
| H <sub>2</sub> O at 85 °C, for 8 h  | No degradation        |     |            |                             | -          |
| H <sub>2</sub> O at 85 °C, for 24 h | No degradation        |     |            |                             | -          |

**Table 32S. Summary of results for oxidation of CARV-MEOG.**

| Stress Condition                             | Rt for Impurity (min) | RRT  | % Impurity | % Degradation of Carvedilol | Peak Match |
|----------------------------------------------|-----------------------|------|------------|-----------------------------|------------|
| 35% H <sub>2</sub> O <sub>2</sub> , 30 min   | 4.49                  | 1.29 | 0.58       | 27.8                        | 989        |
|                                              | 4.68                  | 1.35 | 1.23       |                             |            |
|                                              | 9.22                  | 2.66 | 0.85       |                             |            |
|                                              | 11.40                 | 3.52 | 2.23       |                             |            |
| 35% H <sub>2</sub> O <sub>2</sub> , for 6 h  | 2.96                  | 0.85 | 1.32       | 15.2                        | 977        |
|                                              | 4.64                  | 1.33 | 0.58       |                             |            |
|                                              | 4.85                  | 1.39 | 3.81       |                             |            |
|                                              | 10.04                 | 2.88 | 0.62       |                             |            |
| 30% H <sub>2</sub> O <sub>2</sub> , for 8 h  | 2.95                  | 0.85 | 0.30       | 12.1                        | 989        |
|                                              | 4.62                  | 1.33 | 0.93       |                             |            |
|                                              | 4.81                  | 1.38 | 0.86       |                             |            |
|                                              | 11.35                 | 3.26 | 0.69       |                             |            |
| 35% H <sub>2</sub> O <sub>2</sub> , for 8 h  | 2.98                  | 0.86 | 0.99       | 8.2                         | 978        |
|                                              | 4.65                  | 1.34 | 0.54       |                             |            |
|                                              | 4.87                  | 1.40 | 1.57       |                             |            |
|                                              | 10.05                 | 2.89 | 0.58       |                             |            |
| 30% H <sub>2</sub> O <sub>2</sub> , for 24 h | 2.96                  | 0.85 | 1.41       | 20.1                        | 981        |
|                                              | 4.65                  | 1.33 | 1.41       |                             |            |
|                                              | 4.86                  | 1.40 | 3.40       |                             |            |

|                                                 |       |      |      |      |     |
|-------------------------------------------------|-------|------|------|------|-----|
|                                                 | 10.04 | 2.89 | 0.83 |      |     |
| <b>35% H<sub>2</sub>O<sub>2</sub>, for 24 h</b> | 2.95  | 0.85 | 1.06 | 23.7 | 939 |
|                                                 | 4.62  | 1.33 | 2.40 |      |     |
|                                                 | 4.82  | 1.38 | 2.99 |      |     |
|                                                 | 9.91  | 2.85 | 0.65 |      |     |
|                                                 |       |      |      |      |     |

**Table 33S. Summary of results for oxidation of carvedilol.**

| <b>Stress Condition</b>                              | <b>Rt for Impurity</b> | <b>RRT</b> | <b>% Impurity</b> | <b>% Degradation of Carvedilol</b> | <b>Peak Match</b> |
|------------------------------------------------------|------------------------|------------|-------------------|------------------------------------|-------------------|
| <b>3% H<sub>2</sub>O<sub>2</sub>- 3 h and 30 min</b> | 4.98                   | 1.48       | 0.71              | 11.0                               | 985               |
|                                                      | 11.92                  | 3.55       | 7.13              |                                    |                   |
| <b>35% H<sub>2</sub>O<sub>2</sub>, 30 min</b>        | 4.99                   | 1.49       | 7.95              | 25.9                               | 992               |
|                                                      | 11.92                  | 3.55       | 4.21              |                                    |                   |
| <b>30% H<sub>2</sub>O<sub>2</sub>, for 8 h</b>       | 4.68                   | 1.39       | 0.40              | 33.2                               | 985               |
|                                                      | 4.89                   | 1.46       | 14.87             |                                    |                   |
|                                                      | 7.18                   | 2.14       | 0.82              |                                    |                   |
| <b>35% H<sub>2</sub>O<sub>2</sub>, for 8 h</b>       | 4.68                   | 1.39       | 0.57              | 32.2                               | 981               |
|                                                      | 4.89                   | 1.45       | 12.64             |                                    |                   |
|                                                      | 7.17                   | 2.13       | 0.78              |                                    |                   |
|                                                      | 8.66                   | 2.58       | 1.70              |                                    |                   |
|                                                      | 9.16                   | 2.73       | 1.55              |                                    |                   |
| <b>35% H<sub>2</sub>O<sub>2</sub>, for 6 h</b>       | 4.68                   | 1.39       | 0.39              | 29.3                               | 974               |
|                                                      | 4.89                   | 1.46       | 12.28             |                                    |                   |
|                                                      | 8.67                   | 2.58       | 1.39              |                                    |                   |
|                                                      | 9.16                   | 2.73       | 1.28              |                                    |                   |
|                                                      | 10.16                  | 3.02       | 0.85              |                                    |                   |
| <b>30% H<sub>2</sub>O<sub>2</sub>, for 24 h</b>      | 2.98                   | 0.89       | 1.07              | 40.5                               | 989               |
|                                                      | 4.68                   | 1.39       | 0.76              |                                    |                   |
|                                                      | 4.89                   | 1.46       | 16.50             |                                    |                   |
|                                                      | 7.17                   | 2.13       | 1.76              |                                    |                   |
|                                                      | 8.67                   | 2.58       | 2.99              |                                    |                   |
|                                                      | 9.16                   | 2.73       | 2.71              |                                    |                   |
| <b>35% H<sub>2</sub>O<sub>2</sub>, for 24 h</b>      | 2.73                   | 0.81       | 0.54              | 46.6                               | 992               |
|                                                      | 2.95                   | 0.88       | 1.50              |                                    |                   |
|                                                      | 4.82                   | 1.43       | 27.24             |                                    |                   |

|  |        |      |      |  |  |
|--|--------|------|------|--|--|
|  | 7.04   | 2.10 | 1.89 |  |  |
|  | 9.903  | 2.95 | 0.36 |  |  |
|  | 16.443 | 4.89 | 0.77 |  |  |
|  | 22.19  | 6.60 | 0.44 |  |  |

**Table 34S4. Summary of the results for the oxidation of excipient.**

| <b>Stress Condition</b>                          | <b>Rt for Impurity</b> | <b>RRT</b> | <b>% Impurity</b> | <b>% Degradation of Carvedilol</b> | <b>Peak Match</b> |
|--------------------------------------------------|------------------------|------------|-------------------|------------------------------------|-------------------|
| <b>0.1% H<sub>2</sub>O<sub>2</sub> for 1 h</b>   | No Degradation         |            |                   | NA                                 | NA                |
| <b>3% H<sub>2</sub>O<sub>2</sub> for 3 h</b>     | No Degradation         |            |                   | NA                                 | NA                |
| <b>3% H<sub>2</sub>O<sub>2</sub>- 3 h-30 min</b> | No Degradation         |            |                   | NA                                 | NA                |
| <b>35% H<sub>2</sub>O<sub>2</sub> for 6 h</b>    | No Degradation         |            |                   | NA                                 | NA                |
| <b>30% H<sub>2</sub>O<sub>2</sub> for 8 h</b>    | No Degradation         |            |                   | NA                                 | NA                |
| <b>35% H<sub>2</sub>O<sub>2</sub> for 8 h</b>    | No Degradation         |            |                   | NA                                 | NA                |
| <b>30% H<sub>2</sub>O<sub>2</sub> for 24 h</b>   | No Degradation         |            |                   | NA                                 | NA                |
| <b>35% H<sub>2</sub>O<sub>2</sub> for 24 h</b>   | No Degradation         |            |                   | NA                                 | NA                |

**Table 35S. Summary of the results for the thermal degradation of CARV-MEOG.**

| <b>Stress Condition</b>   | <b>Rt for Impurity (min)</b> | <b>RRT</b> | <b>% Impurity</b> | <b>% Degradation of Carvedilol</b> | <b>Peak Match</b> |
|---------------------------|------------------------------|------------|-------------------|------------------------------------|-------------------|
| <b>150 °C, for 1 h</b>    | 13.22                        | 3.86       | 2.88              | 17.6                               | 996               |
| <b>85 °C, for 24 h</b>    | 12.30                        | 3.67       | 1.76              | 11.7                               | 997               |
| <b>120 °C, for 2 days</b> | 13.20                        | 3.78       | 2.39              | 32.2                               | 1000              |
| <b>120 °C, for 3 days</b> | 13.36                        | 3.70       | 17.81             | 69.3                               | 1000              |
| <b>120 °C, for 4 days</b> | 11.80                        | 3.70       | 2.25              | 60.8                               | 1000              |

**Table 36S. Summary of the results of the thermal degradation of carvedilol.**

| <b>Stress Condition</b>   | <b>Rt for Impurity (min)</b> | <b>RRT</b> | <b>% Impurity</b> | <b>% Degradation of Carvedilol</b> | <b>Peak Match</b> |
|---------------------------|------------------------------|------------|-------------------|------------------------------------|-------------------|
| <b>85 °C, for 24 h</b>    | 3.92                         | 1.2        | 0.23              | 14.2                               | 991               |
|                           | 5.24                         | 1.6        | 0.14              |                                    |                   |
| <b>120 °C, for 4 days</b> | 2.95                         | 0.9        | 0.50              | 13.4                               | 984               |
|                           | 6.82                         | 2.1        | 0.41              |                                    |                   |

|  |       |     |      |  |  |
|--|-------|-----|------|--|--|
|  | 11.26 | 3.4 | 0.59 |  |  |
|  | 11.79 | 3.6 | 0.57 |  |  |
|  | 13.32 | 4.0 | 0.38 |  |  |

**Table 37S. Summary of the results for the thermal degradation of excipient.**

| Stress Condition   | Rt for Impurity (min) | RRT  | % Impurity | % Degradation of Carvedilol | Peak Match |
|--------------------|-----------------------|------|------------|-----------------------------|------------|
| 85 °C, for 24 h    | 3.45                  | 1.03 | 0.06       | N.A                         | N.A        |
|                    | 4.70                  | 1.40 | 0.14       |                             |            |
|                    | 6.39                  | 1.91 | 0.14       |                             |            |
| 120 °C, for 4 days | 3.45                  | 1.02 | 0.06       | N.A                         | N.A        |
|                    | 4.59                  | 1.36 | 0.05       |                             |            |
|                    | 6.19                  | 1.84 | 0.04       |                             |            |

**Table 38S. Summary of the results for the photodegradation for CARV-MEOG.**

| Stress Condition     | Rt for Impurity (min) | RRT  | % Impurity | % Degradation of Carvedilol | Peak Match |
|----------------------|-----------------------|------|------------|-----------------------------|------------|
| Sun light for 1 week | 2.08                  | 0.63 | 0.29       | 11.9                        | 988        |
|                      | 3.997                 | 1.21 | 0.07       |                             |            |
|                      | 6.86                  | 2.07 | 0.15       |                             |            |
|                      | 11.89                 | 3.58 | 6.20       |                             |            |

**Table 39S. Summary of the results for the photodegradation of carvedilol.**

| Stress Condition     | Rt for Impurity (min) | RRT | % Impurity | % Degradation of Carvedilol | Peak Match |
|----------------------|-----------------------|-----|------------|-----------------------------|------------|
| Sun light for 1 week | No Degradation        |     |            | NA                          | NA         |

**Table 40S. Summary of the results for the photodegradation of excipients.**

| Stress Condition    | Rt for Impurity (min) | RRT  | % Impurity | % Degradation of Carvedilol | Peak Match |
|---------------------|-----------------------|------|------------|-----------------------------|------------|
| Sunlight for 1 week | 3.45                  | 1.04 | 0.02       | N.A                         | N.A        |
|                     | 4.60                  | 1.39 | 0.02       |                             |            |
|                     | 6.20                  | 1.87 | 0.01       |                             |            |

**Table 41S. Summary of results of Air degradation for CARV-MEOG, carvedilol, and excipients**

| CARV-MEOG                           |                       |     |            |                       |            |
|-------------------------------------|-----------------------|-----|------------|-----------------------|------------|
| Stress Condition                    | Rt for Impurity (min) | RRT | % Impurity | % Degradation of CARV | Peak Match |
| Keep at RT with solvent for 24 h    | No degradation        |     |            | 0.0                   | 989        |
| Keep at RT without solvent for 24 h | No degradation        |     |            | 0.0                   | 985        |
| CARV Raw material                   |                       |     |            |                       |            |
| Stress Condition                    | Rt for Impurity (min) | RRT | % Impurity | % Degradation of CARV | Peak Match |
| Keep at RT with Solvent for 24 h    | No degradation        |     |            | 0.0                   | 986        |
| Keep at RT without Solvent for 24 h | No degradation        |     |            | 0.0                   | 989        |
| Excipient                           |                       |     |            |                       |            |
| Stress Condition                    | Rt for Impurity (min) | RRT | % Impurity | % Degradation of CARV | Peak Match |
| Keep at RT with Solvent for 24 h    | No degradation        |     |            |                       | -          |
| Keep at RT without Solvent for 24 h | No degradation        |     |            |                       | -          |



## List of Figures:

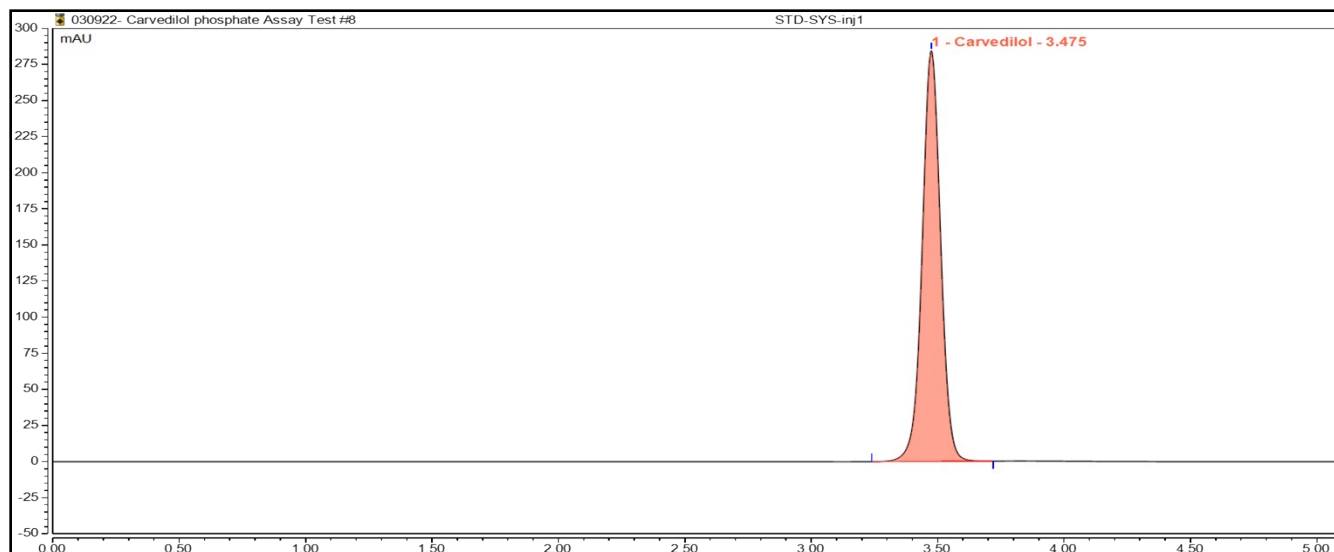

**Figure 1S.** A representative chromatogram for system suitability of the assay test.

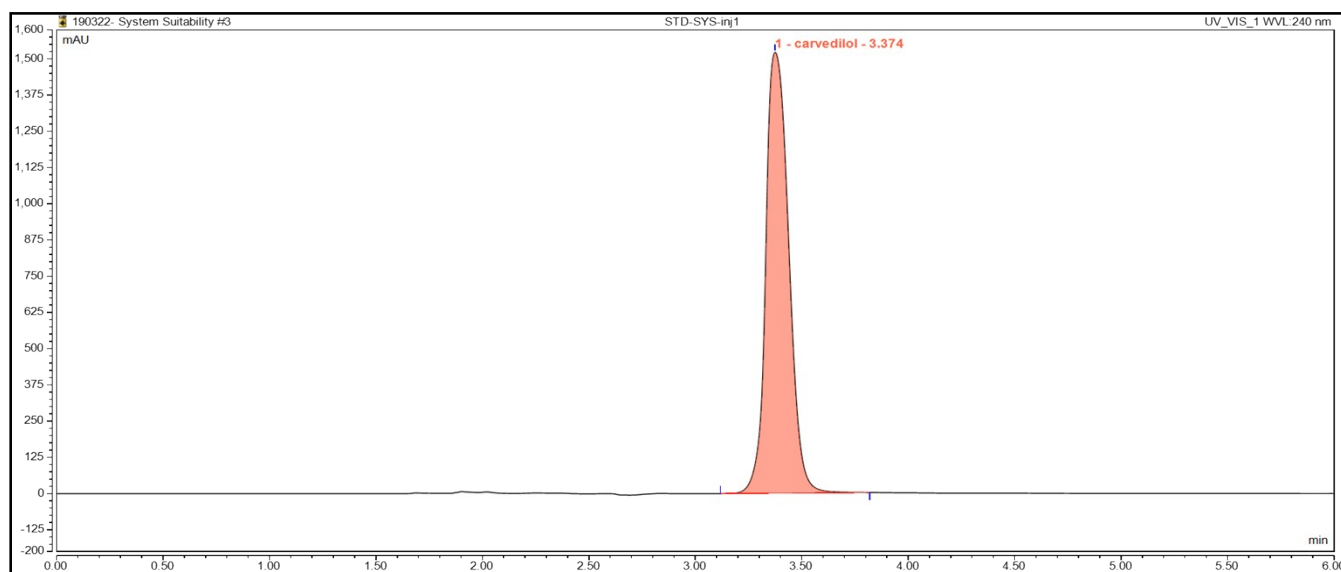

**Figure 2S.** A representative chromatogram for system suitability of the dissolution test.

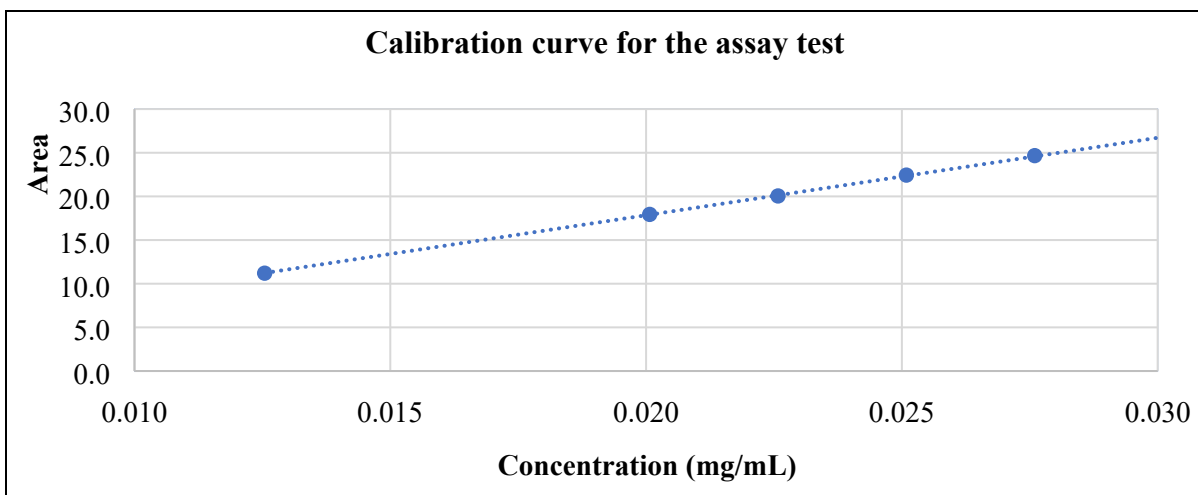

**Figure 3S.** Calibration curve for linearity test of assay test.

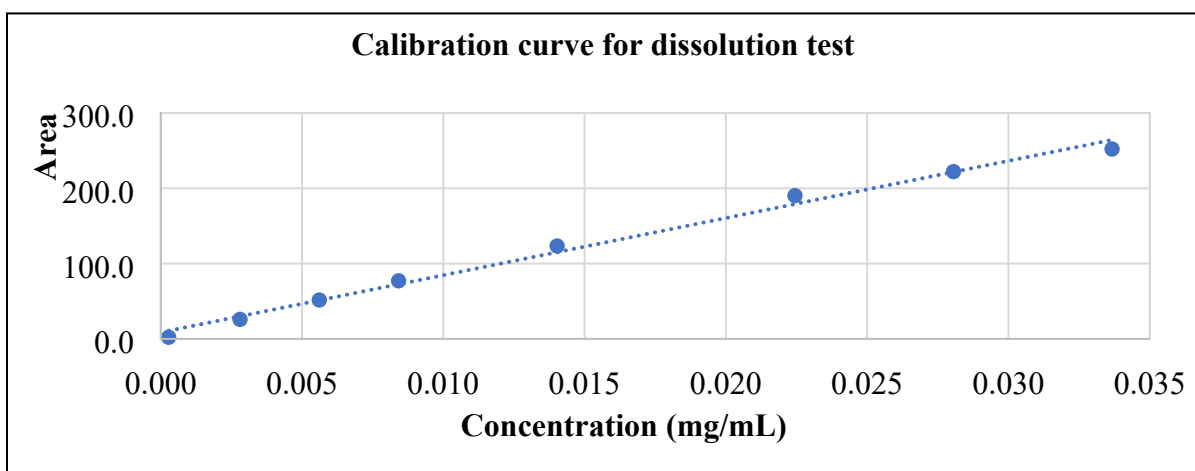

**Figure 4S.** Calibration curve for linearity test of dissolution test.

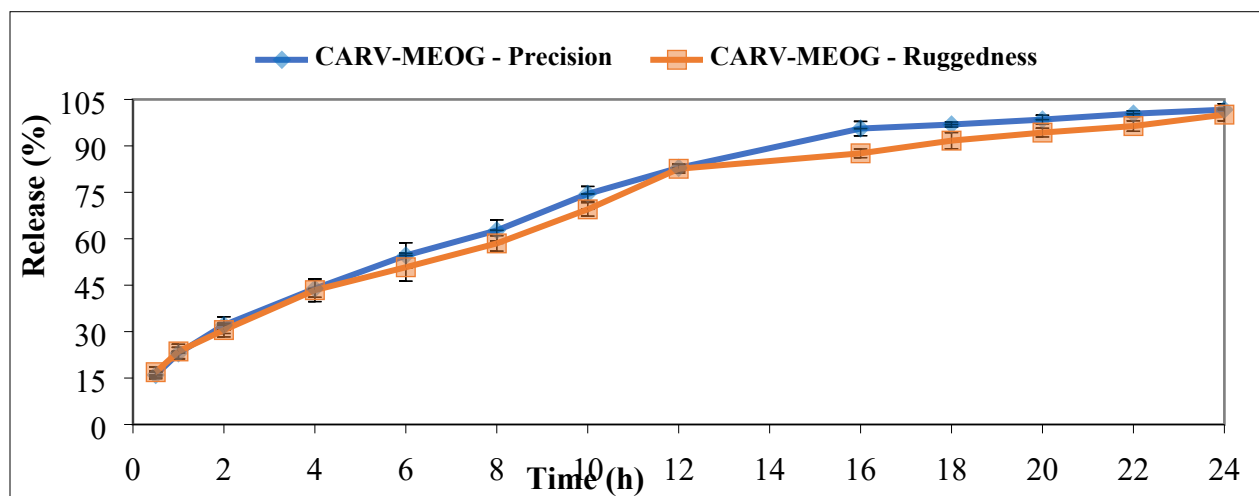

**Figure 5S.** A plot between precision and ruggedness.

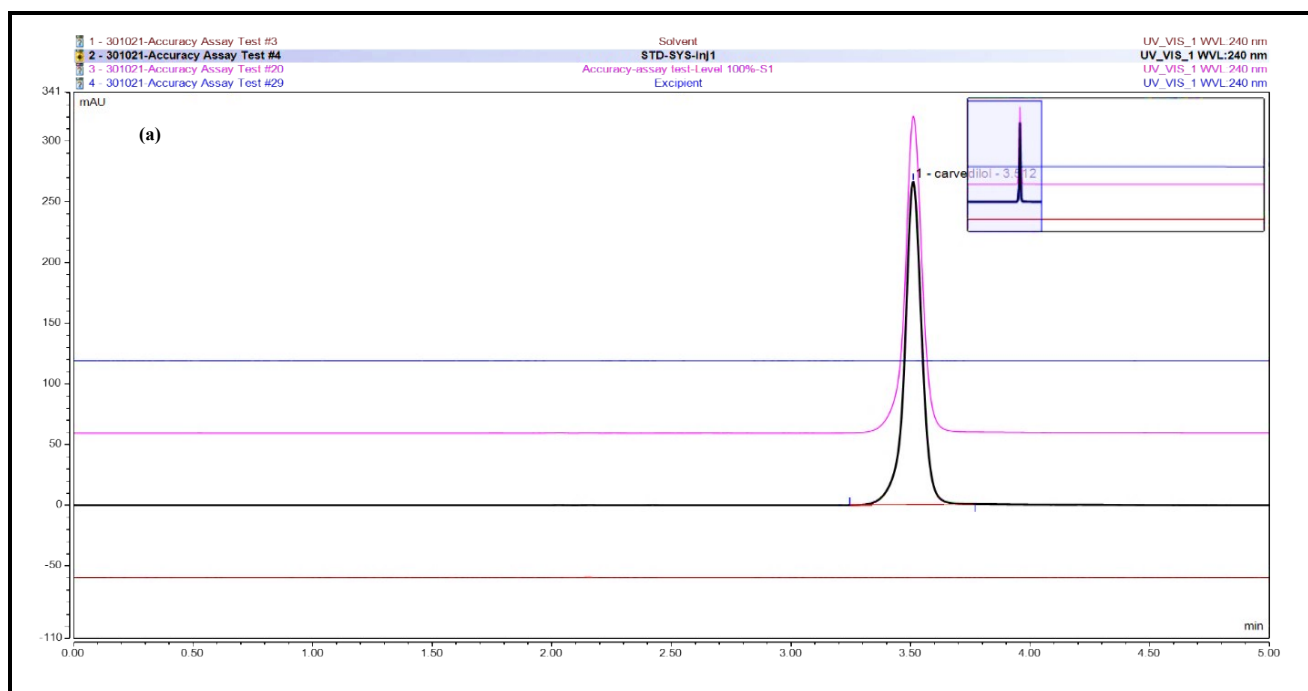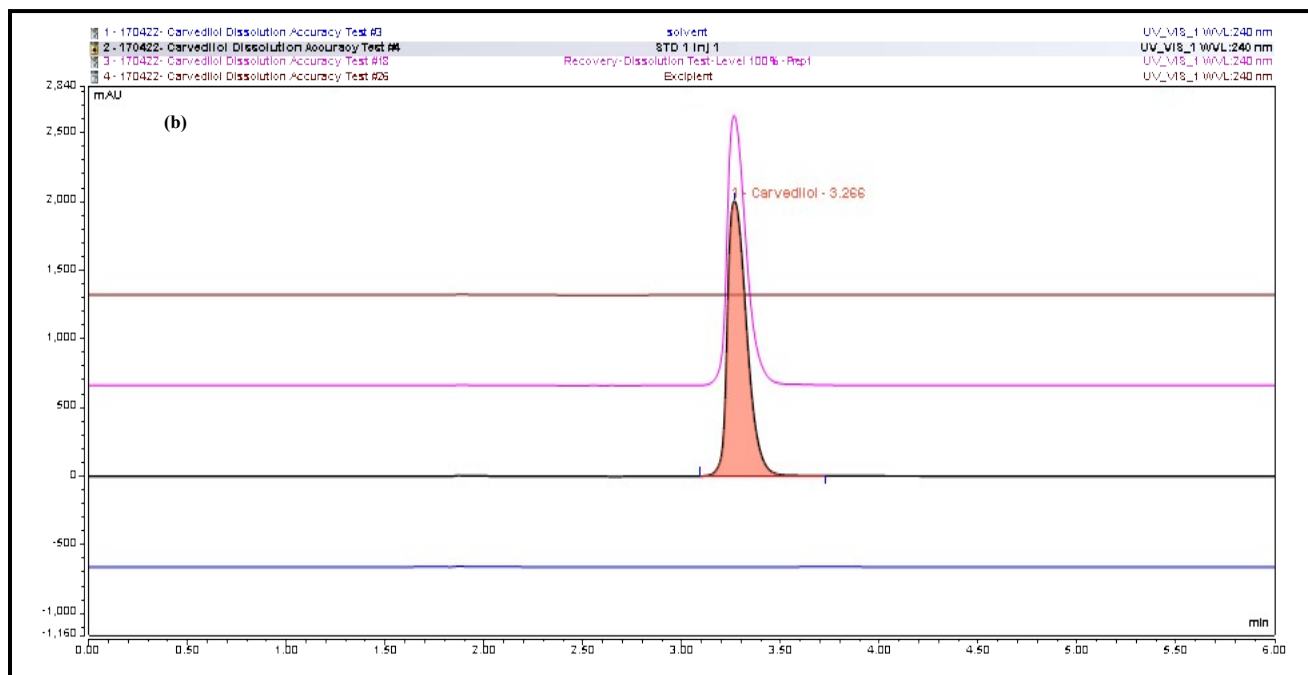

**Figure 6S.** Overlay chromatogram for solvent, standard, sample, and excipients: a- assay test, b- dissolution test.

## Forced Degradation Study – Chromatograms (CARV Raw material)

### Acid Hydrolysis:

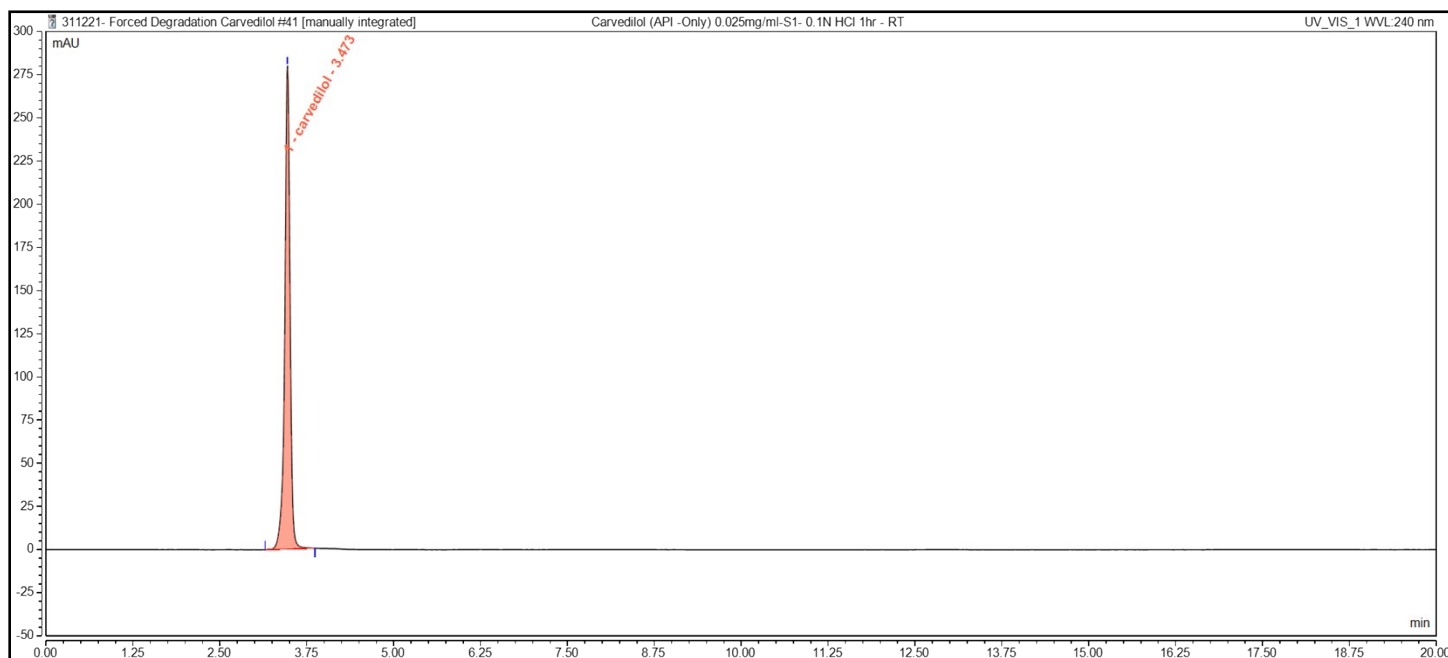

**Figure 7S.** HPLC Chromatogram of acid hydrolysis of CARV, 0.1 M HCl for 1 h at RT.

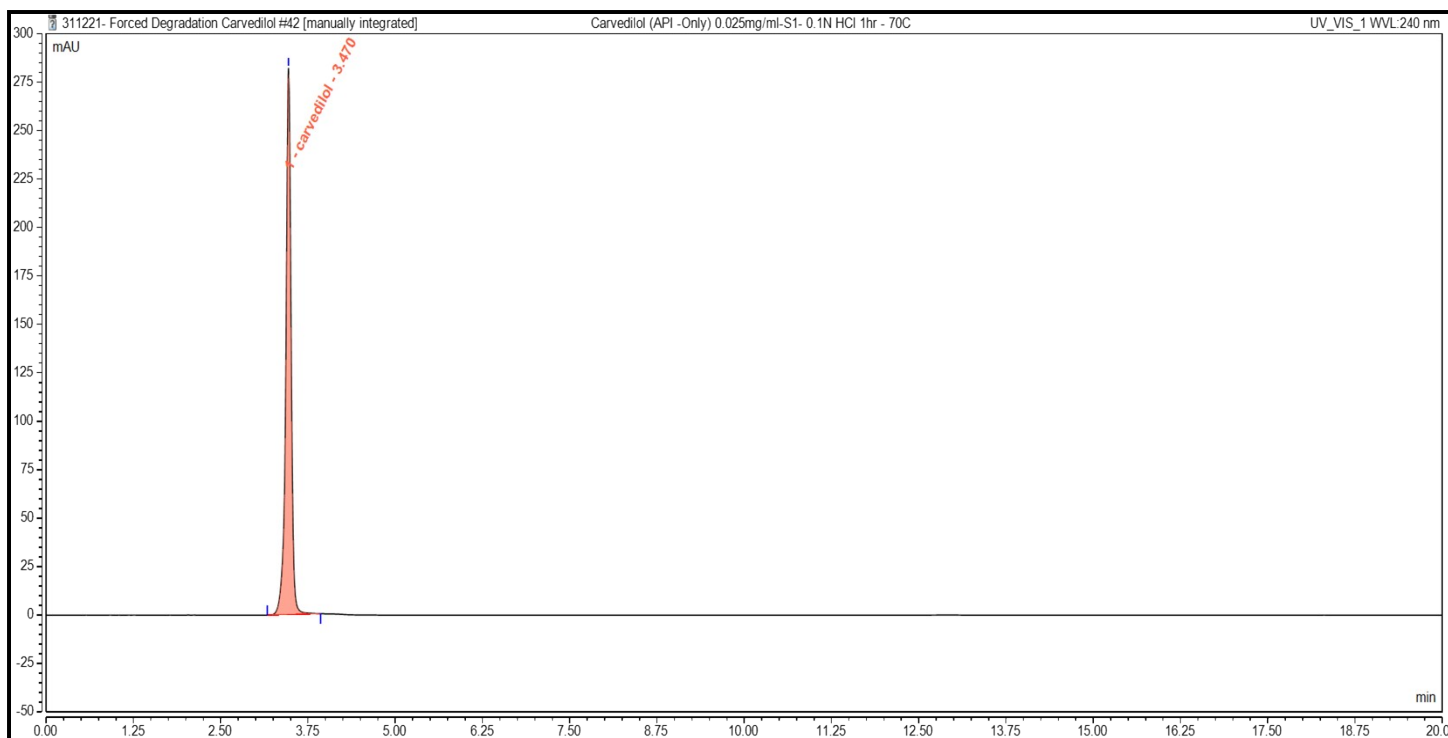

**Figure 8S.** HPLC Chromatogram of acid hydrolysis of CARV, 0.1 M HCl for 1 h at 70 °C.

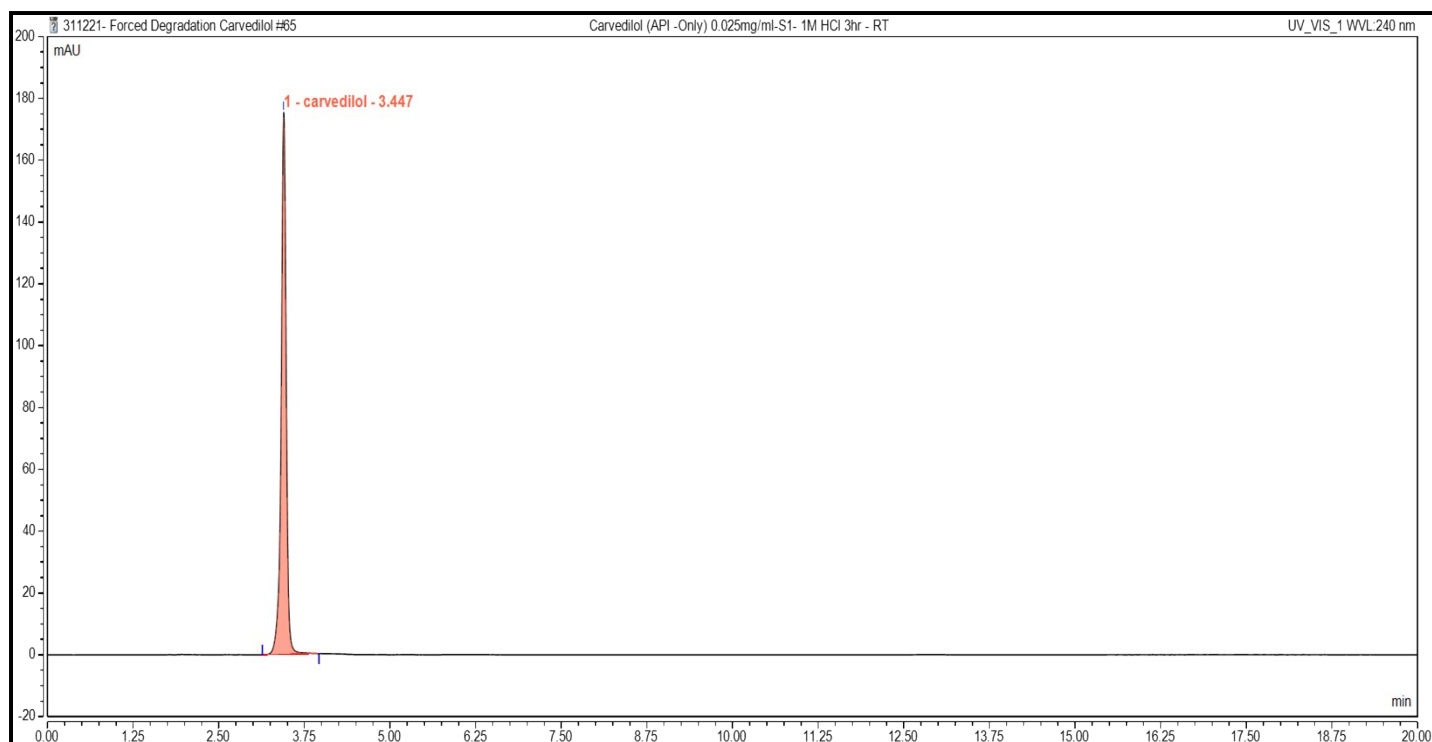

**Figure 9S.** HPLC Chromatogram of acid hydrolysis of CARV, 1.0 M HCl for 3 h at RT.

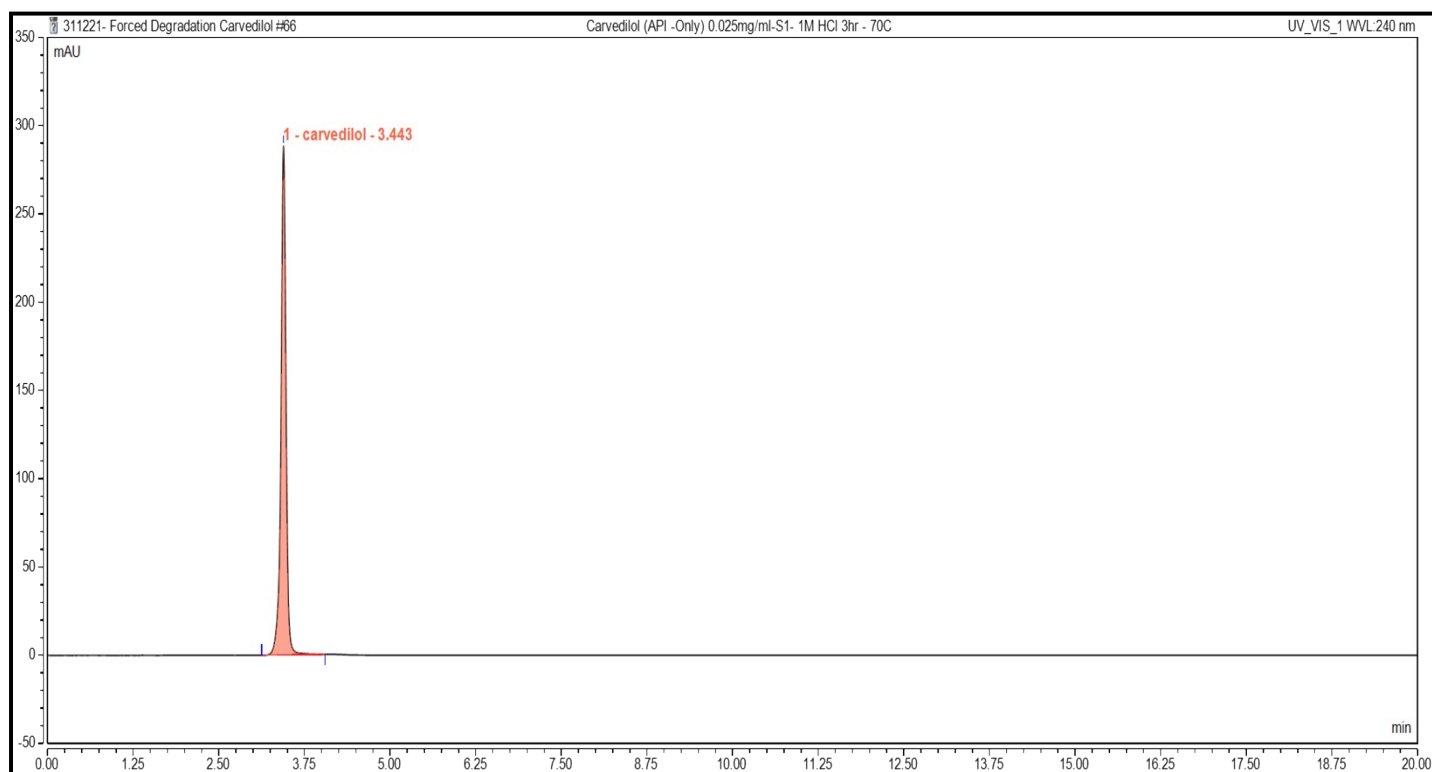

**Figure 10S.** HPLC Chromatogram of acid hydrolysis of CARV, 1.0 M HCl for 3 h at 70 °C.

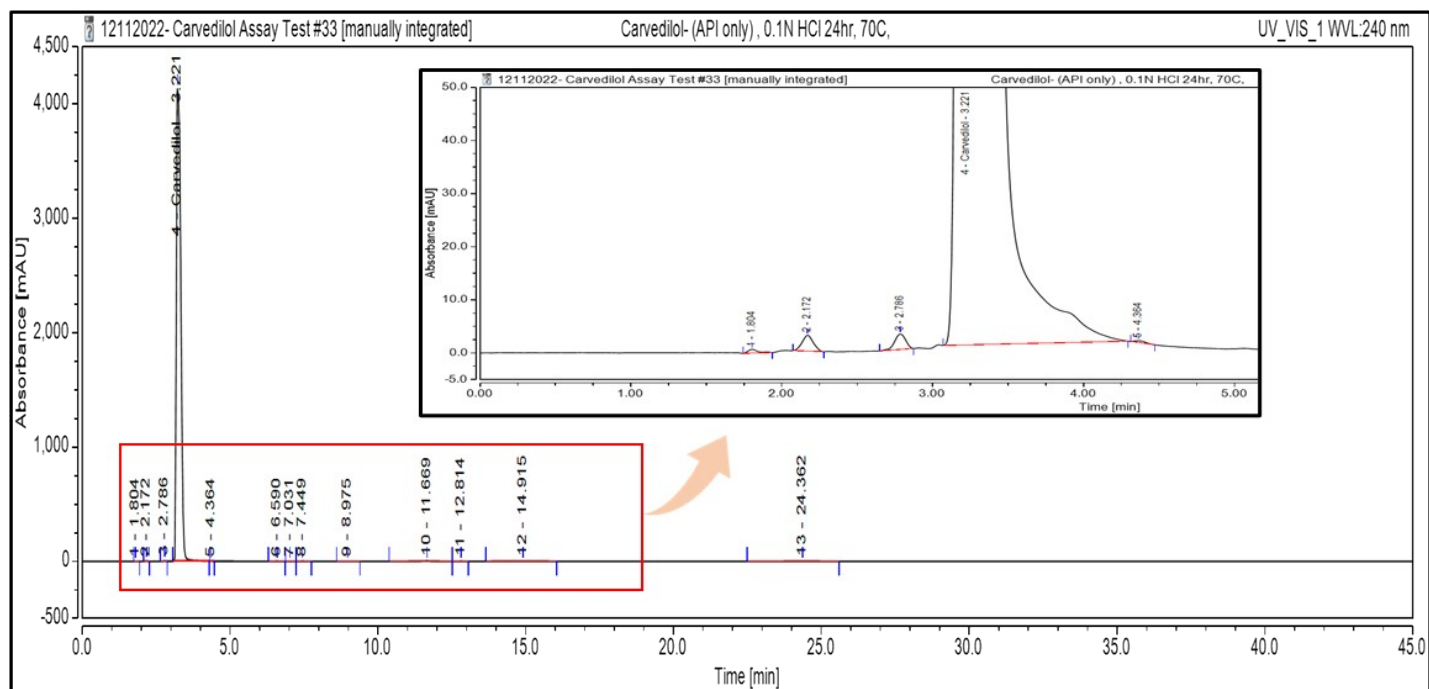

**Figure 11S.** HPLC chromatogram of acid hydrolysis of CARV, 0.1 M HCl for 24 h at 70 °C.

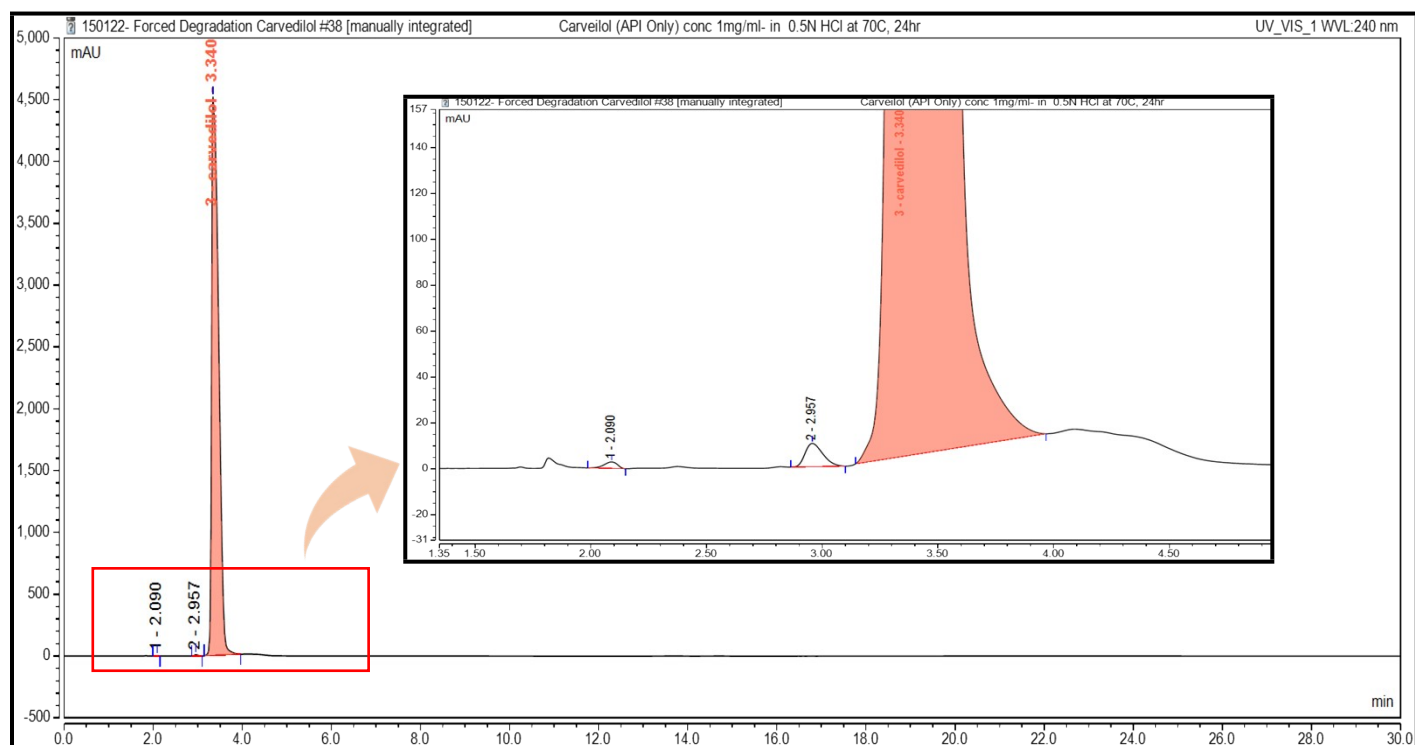

**Figure 12S.** HPLC chromatogram of acid hydrolysis of CARV, 0.5 M HCl for 24 h at 70 °C.

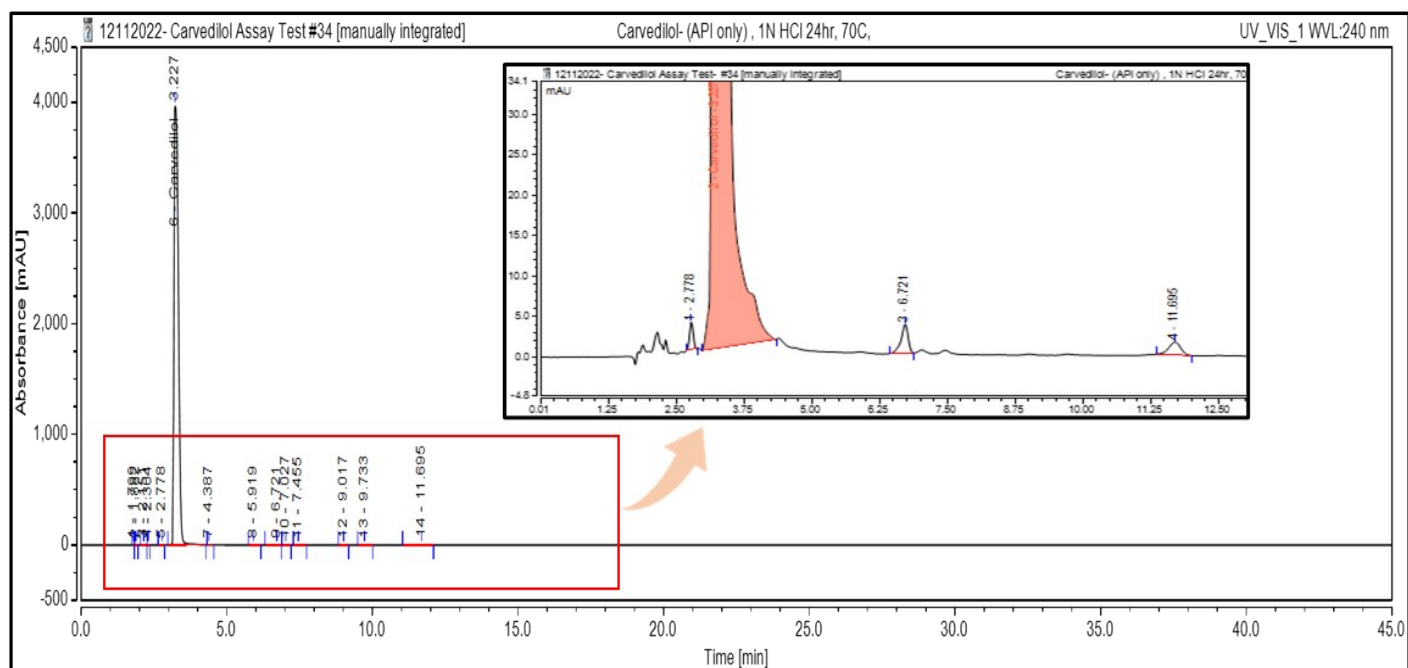

**Figure 13S.** HPLC chromatogram of acid hydrolysis of CARV, 1.0 M HCl for 24 h at 70 °C.

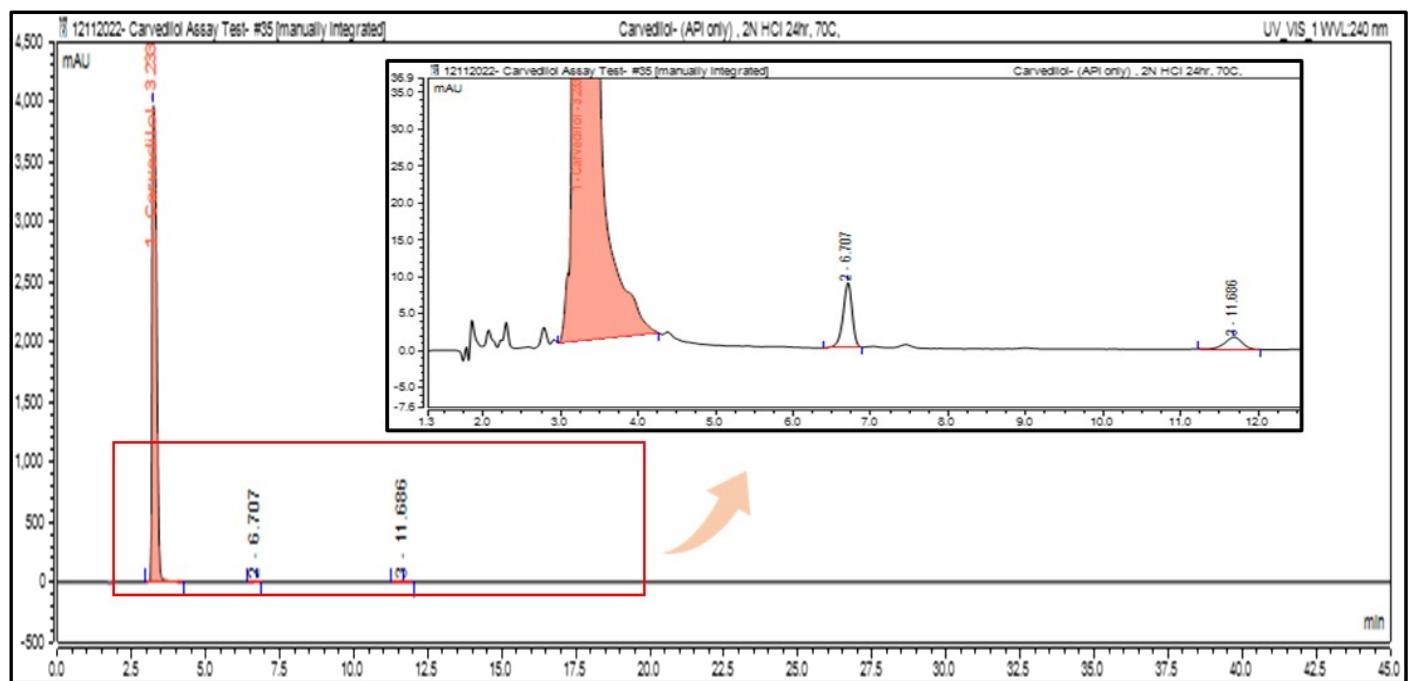

**Figure 14S.** HPLC chromatogram of acid hydrolysis of CARV, 2.0 M HCl for 24 h at 70 °C.

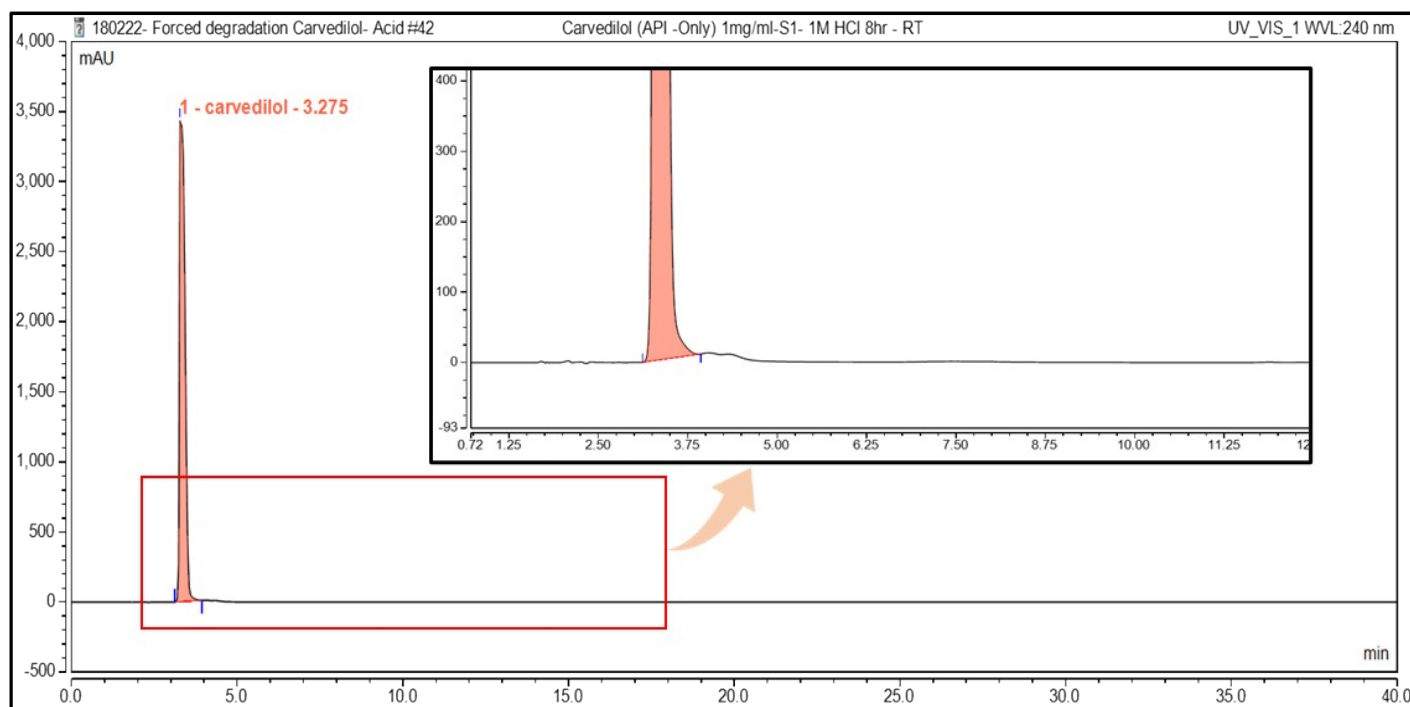

**Figure 15S.** HPLC chromatogram of acid hydrolysis of CARV, 1.0 M HCl for 8 h at RT.

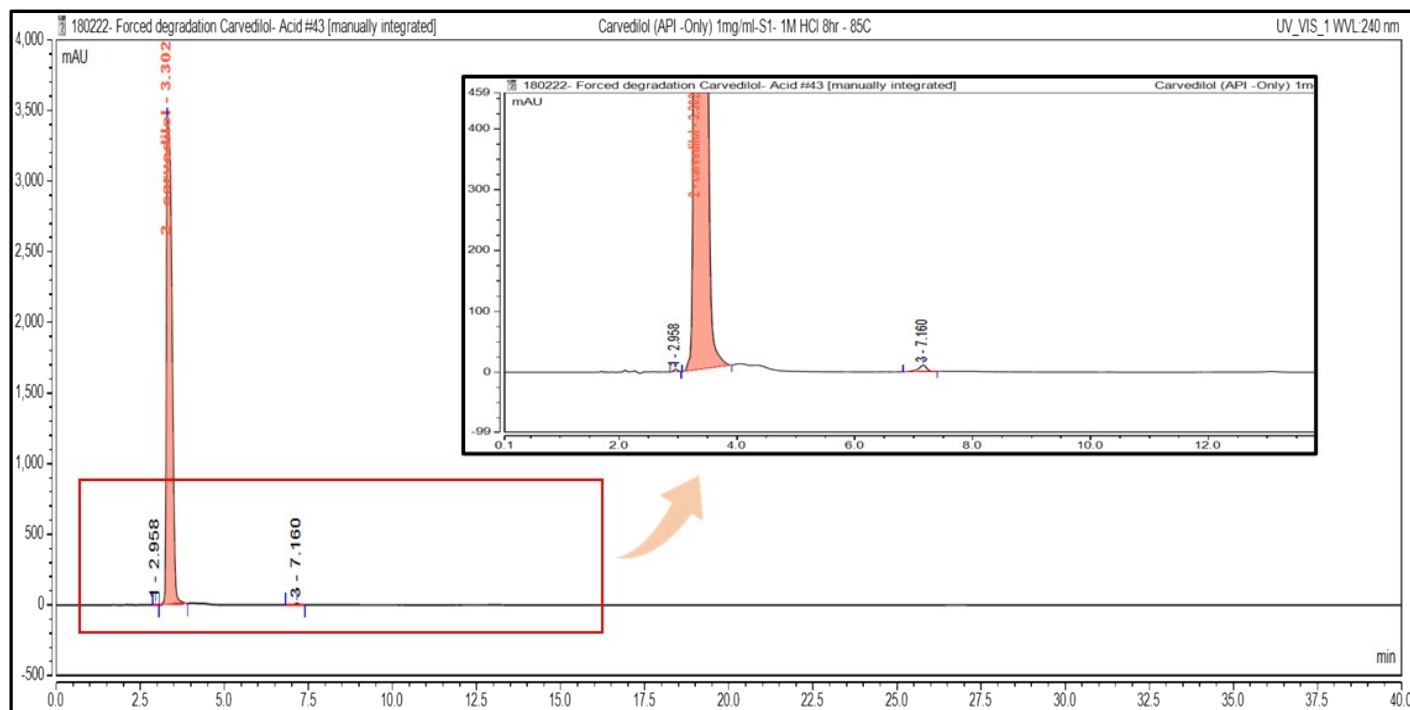

**Figure 16S.** HPLC chromatogram of acid hydrolysis of CARV, 1.0 M HCl for 8 h at 85 °C.



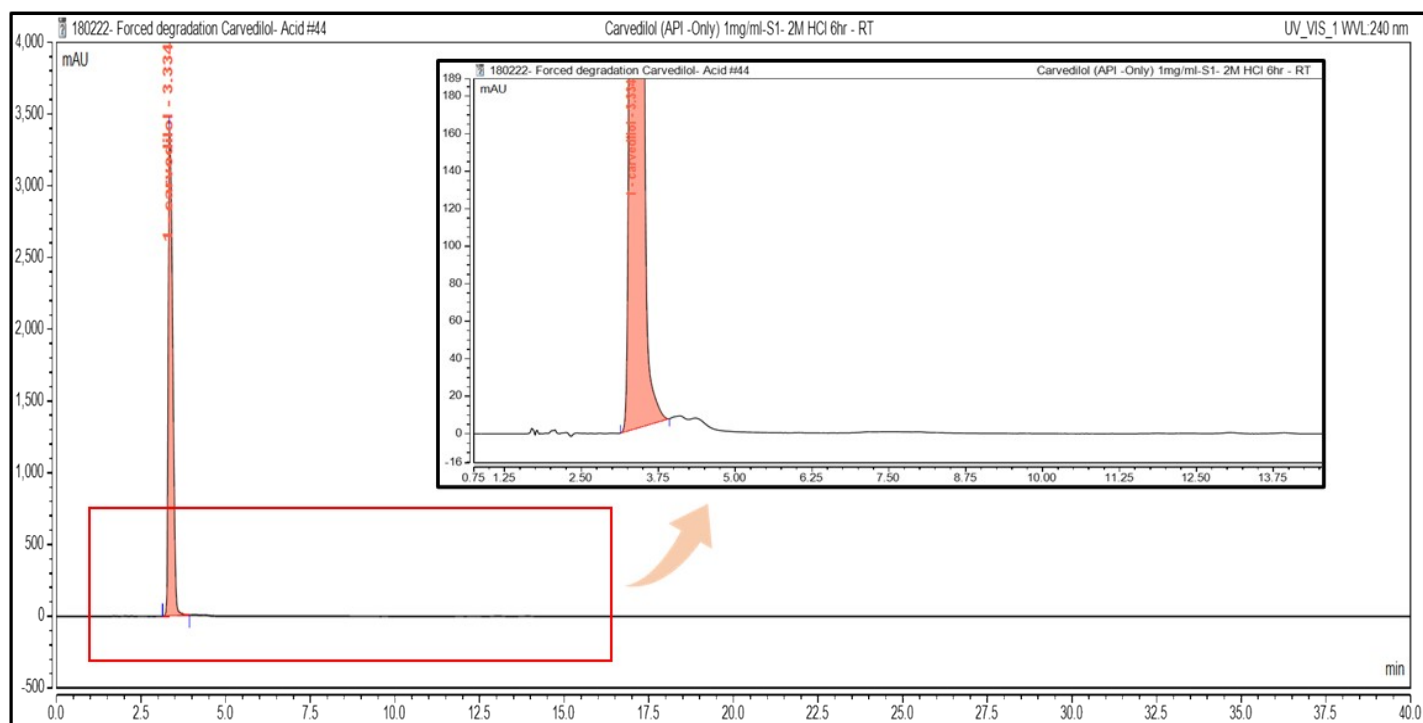

**Figure 17S.** HPLC chromatogram of acid hydrolysis of CARV, 2.0 M HCl for 6 h at RT.

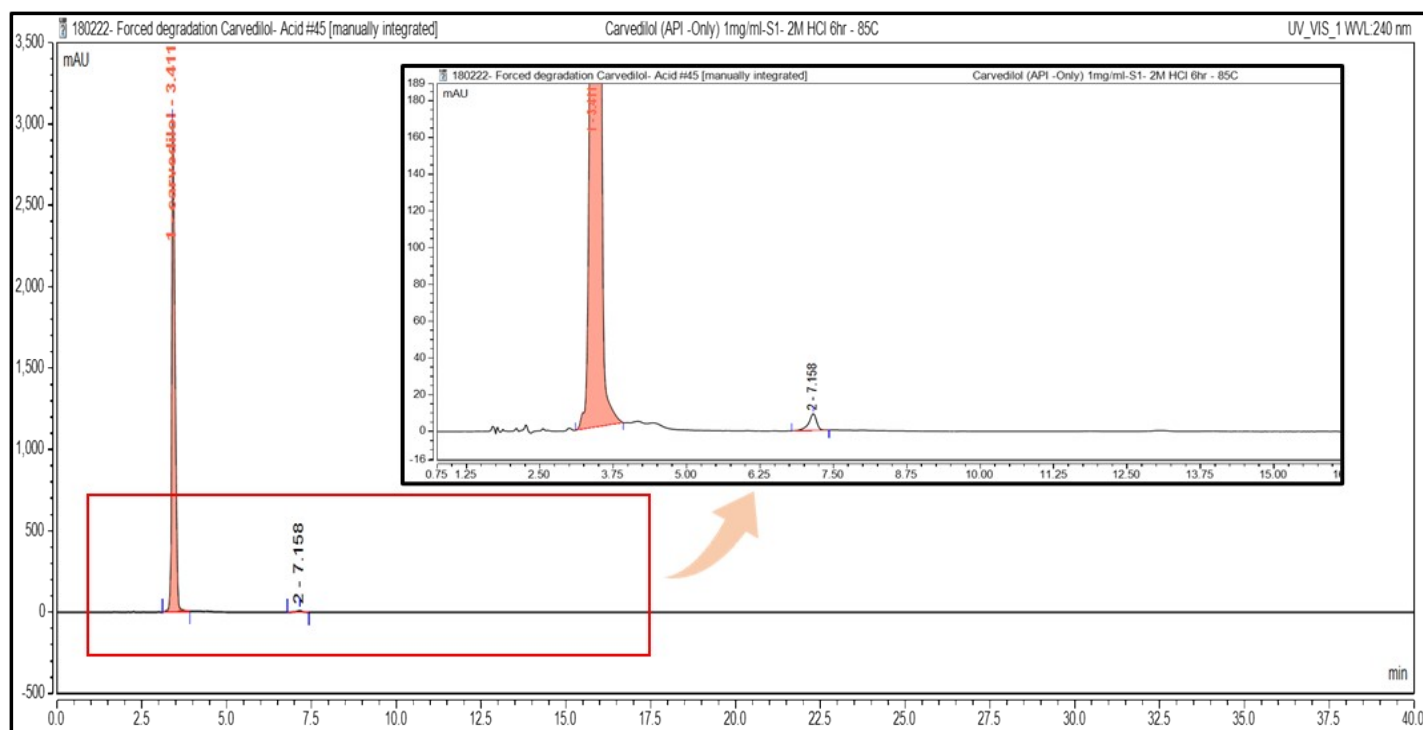

**Figure 18S.** HPLC chromatogram of acid hydrolysis of CARV, 2.0 M HCl for 6 h at 85 °C.

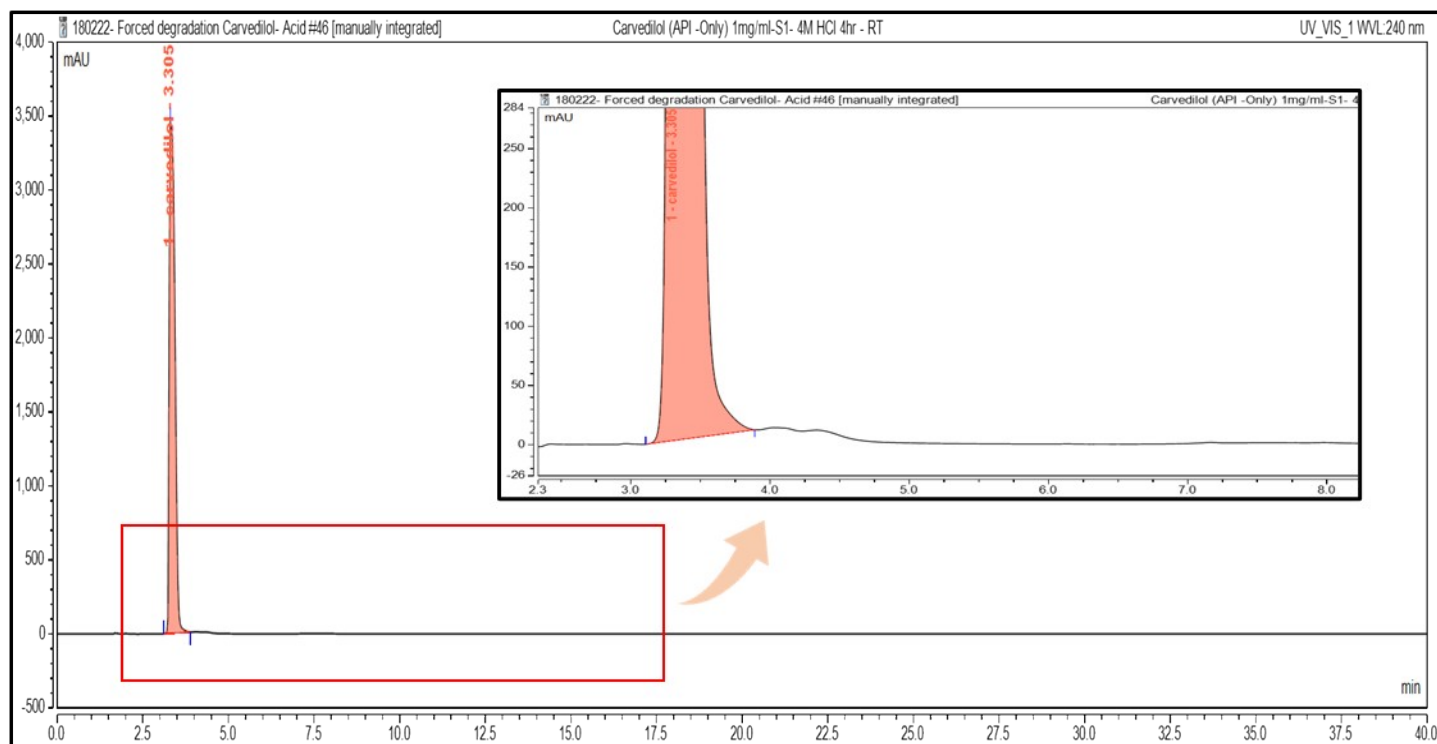

**Figure 19S.** HPLC chromatogram of acid hydrolysis of CARV, 4.0 M HCl for 4 h at RT.

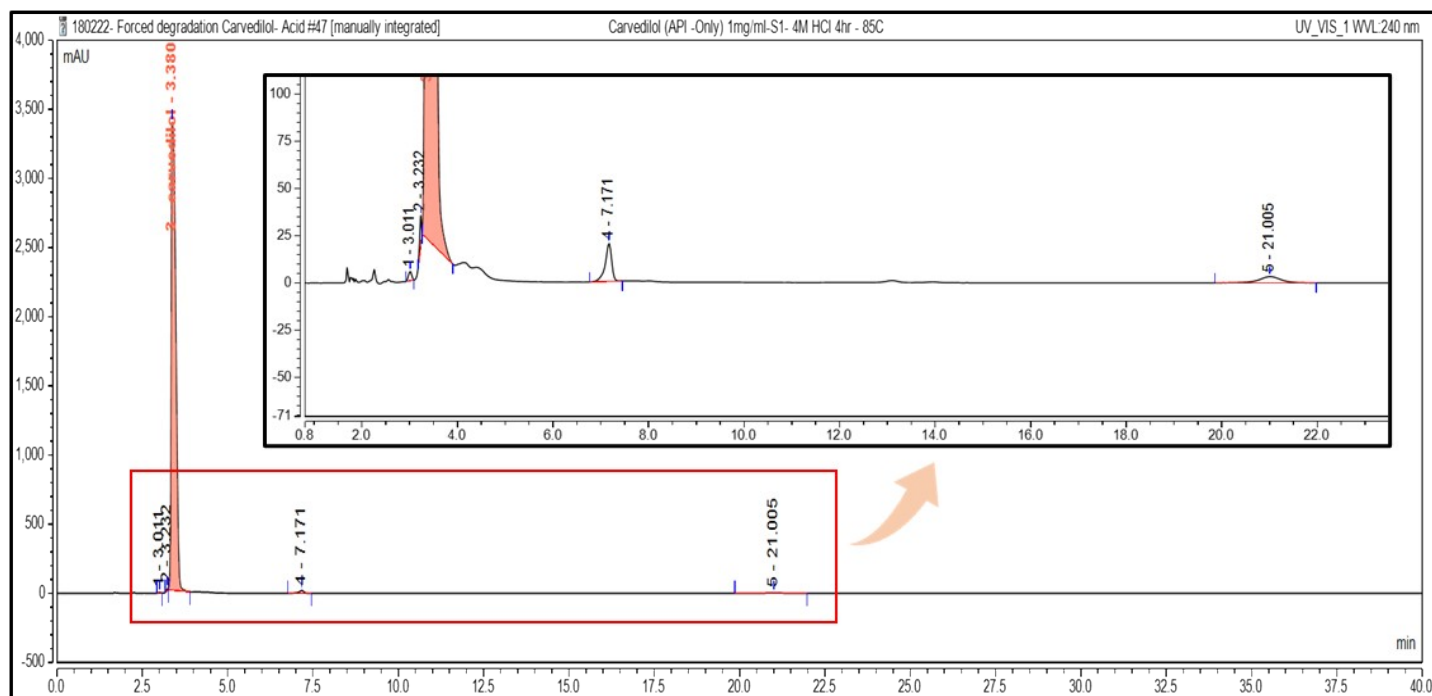

**Figure 20S.** HPLC chromatogram of acid hydrolysis of CARV, 4.0 M HCl for 4 h at 85 °C.

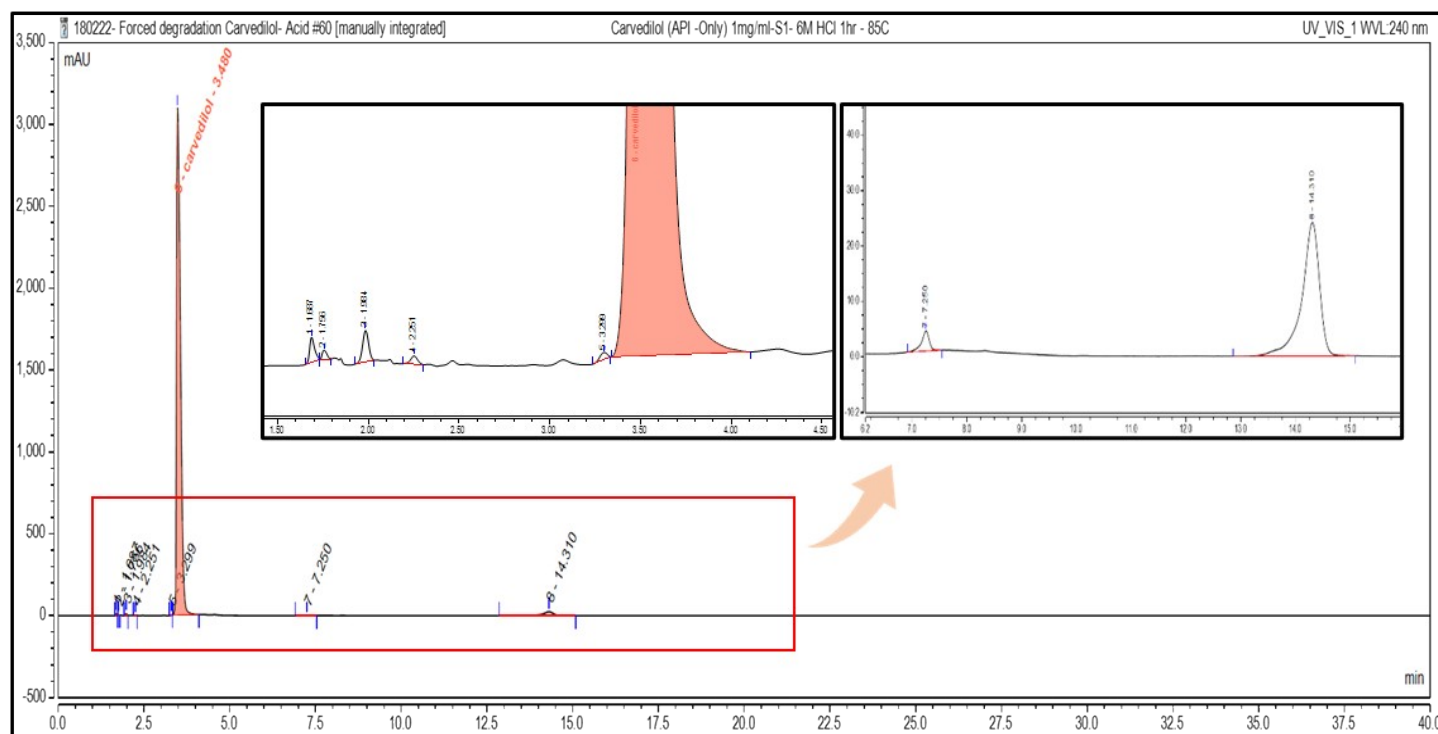

**Figure 21S.** HPLC chromatogram of acid hydrolysis of CARV, 6.0 M HCl for 1 h at 85 °C.

### CARV-MEOG - Acid Hydrolysis:

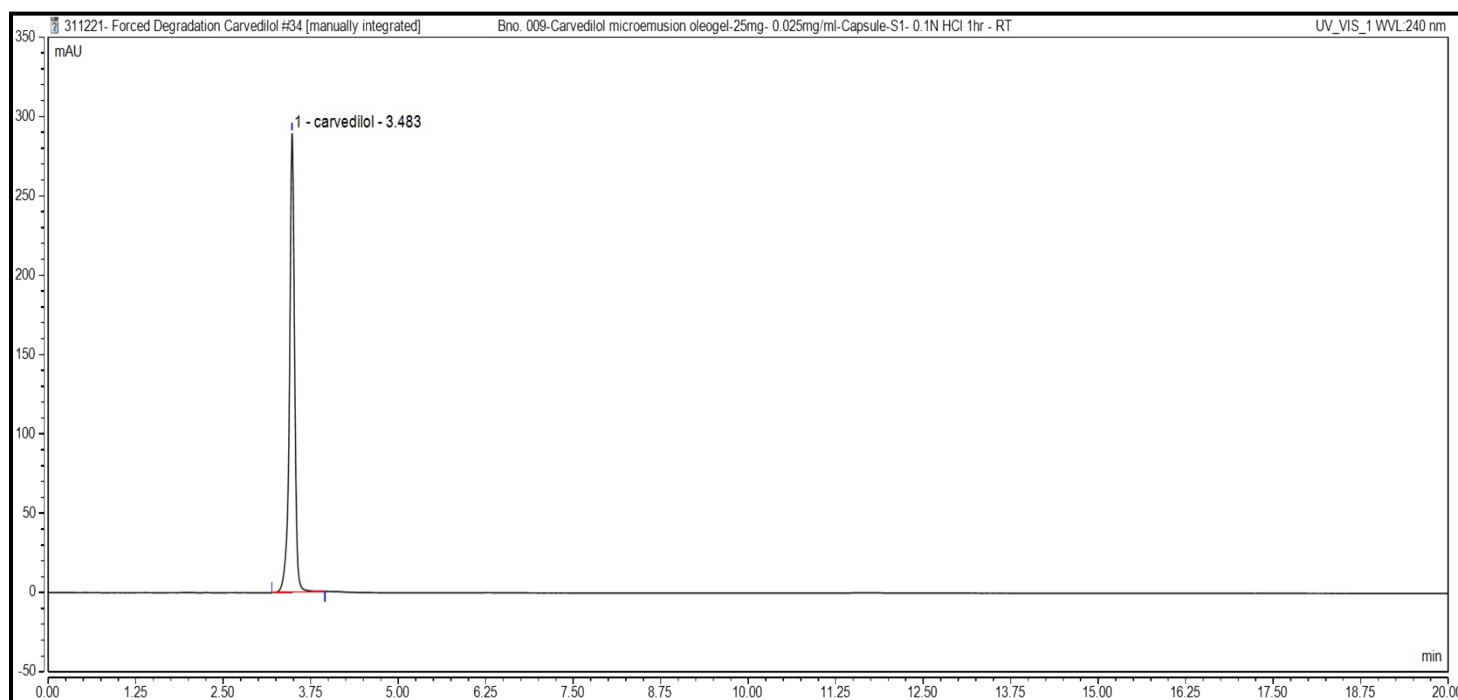

**Figure 22S.** HPLC chromatogram of acid hydrolysis of CARV-MEOG, 0.1 M HCl for 1 h at RT.

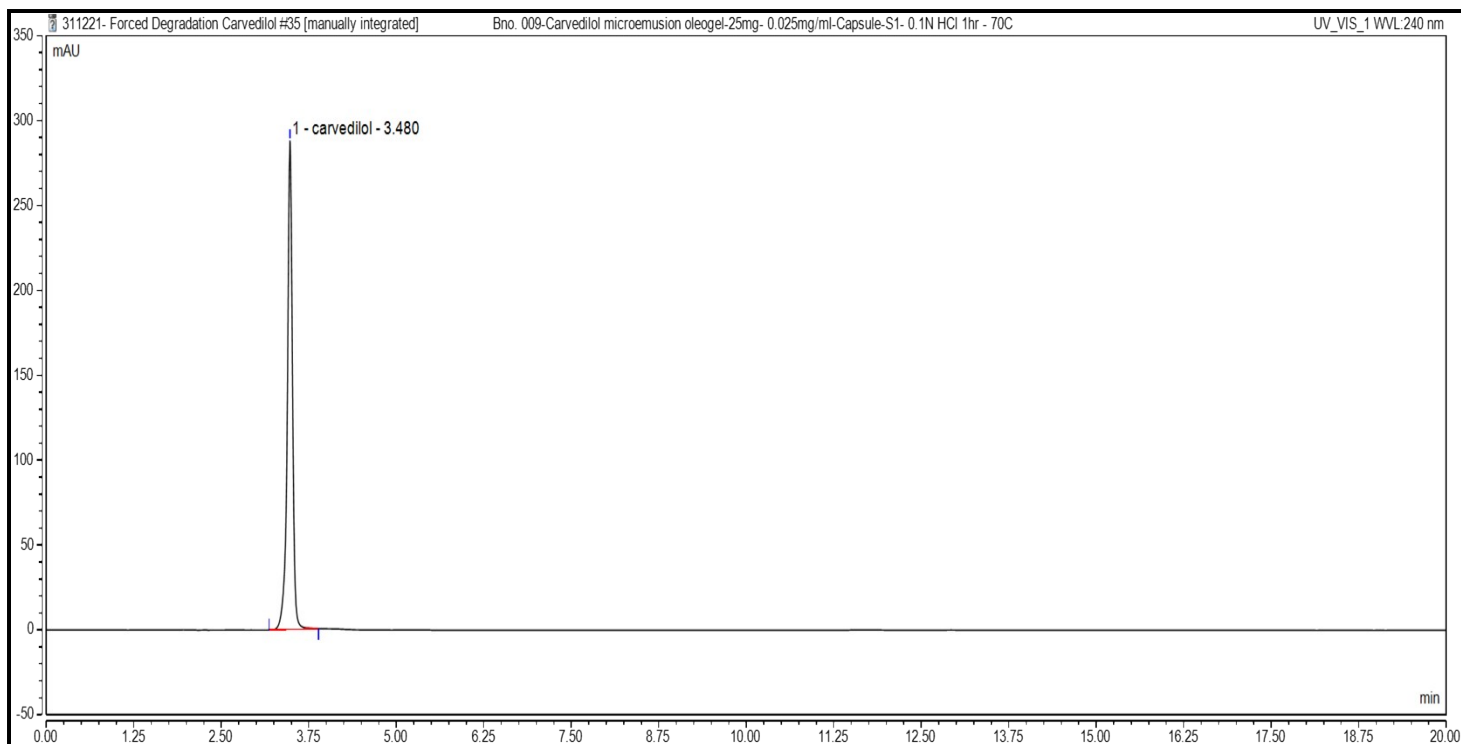

**Figure 23S.** HPLC chromatogram of acid hydrolysis of CARV-MEOG, 0.1 M HCl for 1 h at 70 °C.

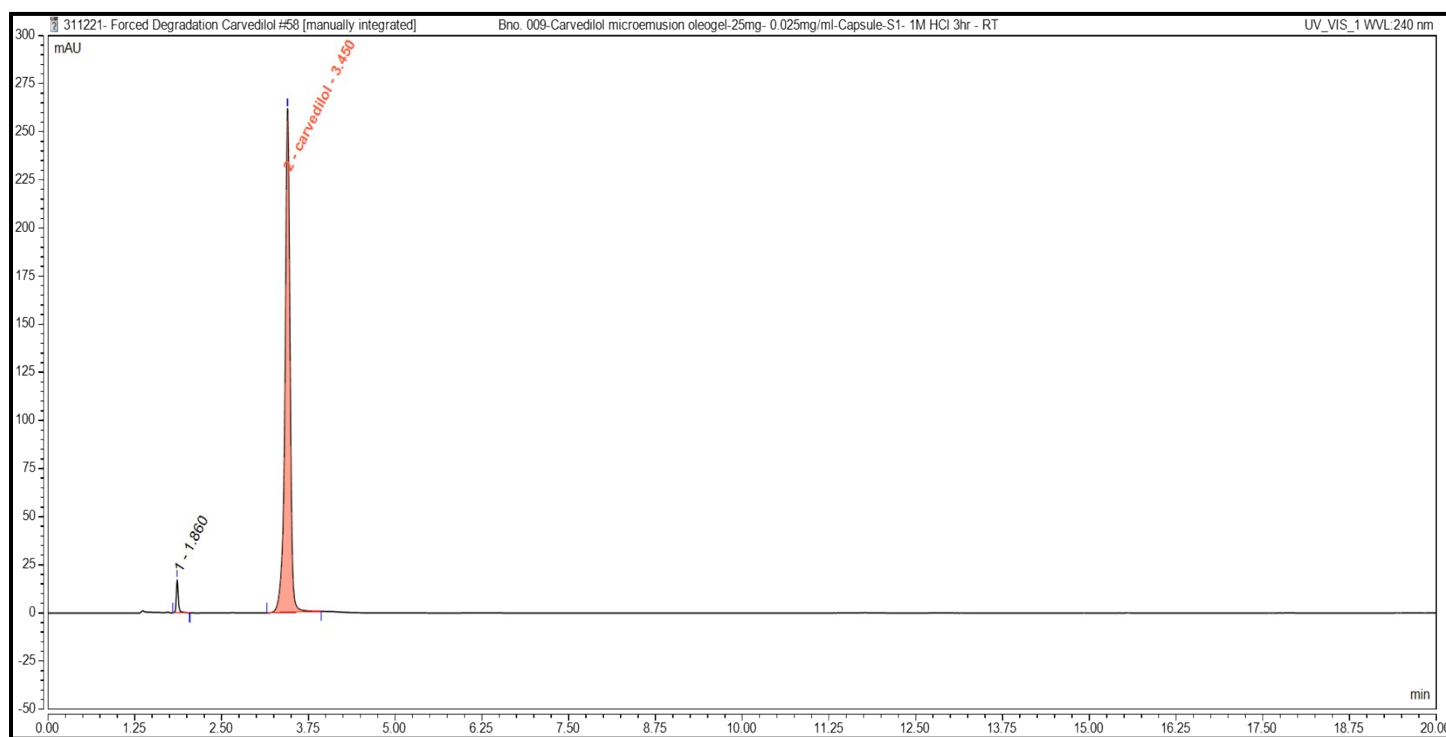

**Figure 24S.** HPLC Chromatogram of acid hydrolysis of CARV-MEOG, 1.0 M HCl for 3 h at RT.  
(Note: peak at retention time 1.860 min is related for the excipient degradation).

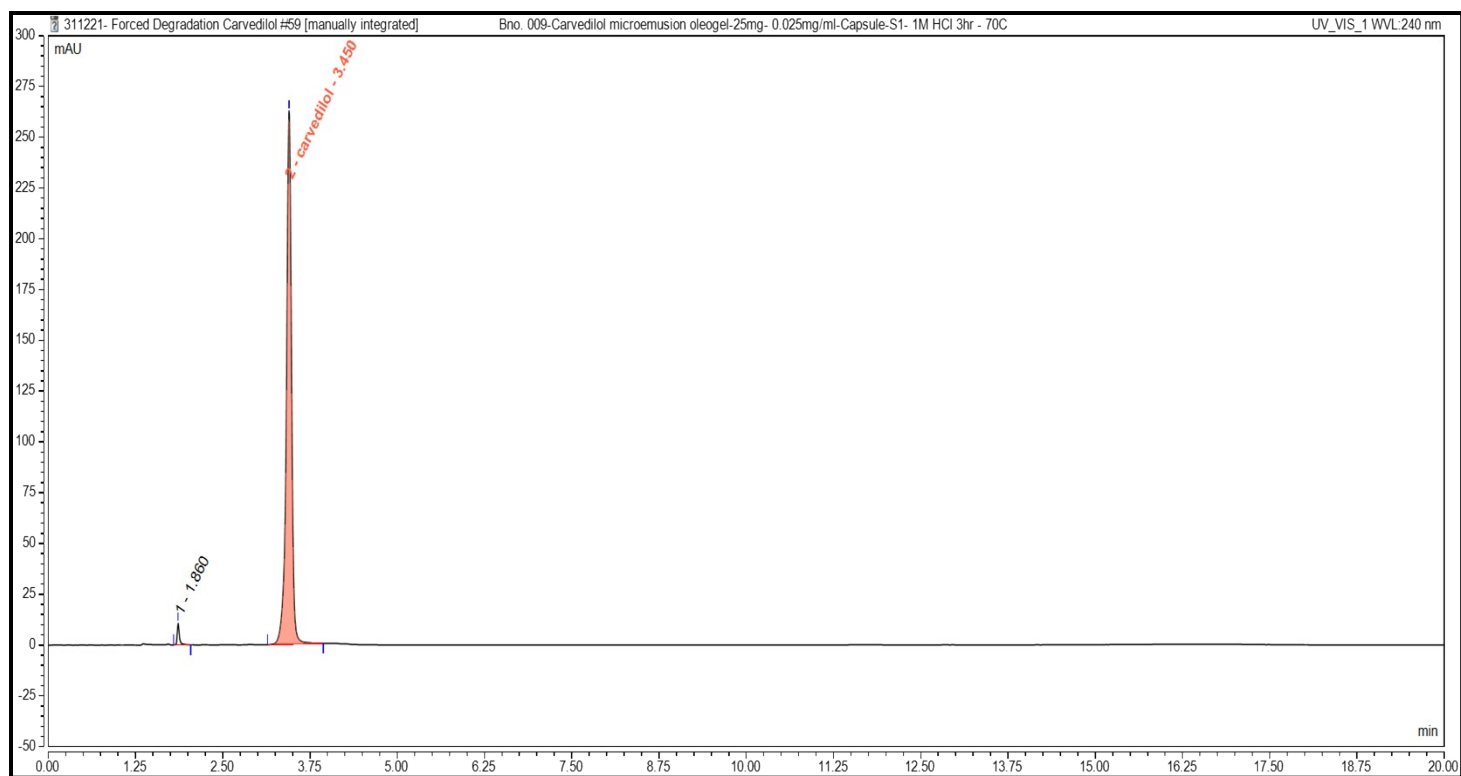

**Figure 25S.** HPLC chromatogram of acid hydrolysis of CARV-MEOG, 1.0 M HCl for 3 h at 70 °C.

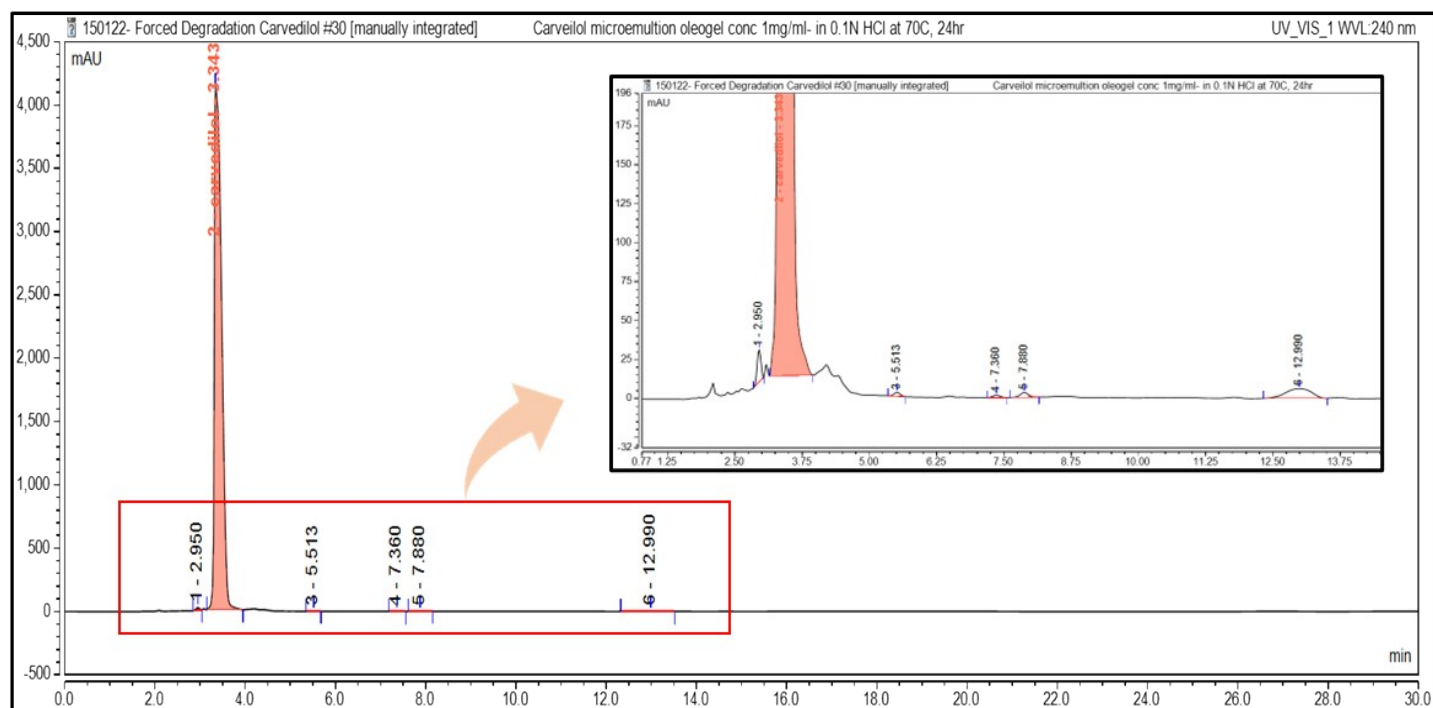

**Figure 26S.** HPLC chromatogram of acid hydrolysis of CARV-MEOG, 0.1 M HCl for 24 h at 70 °C.

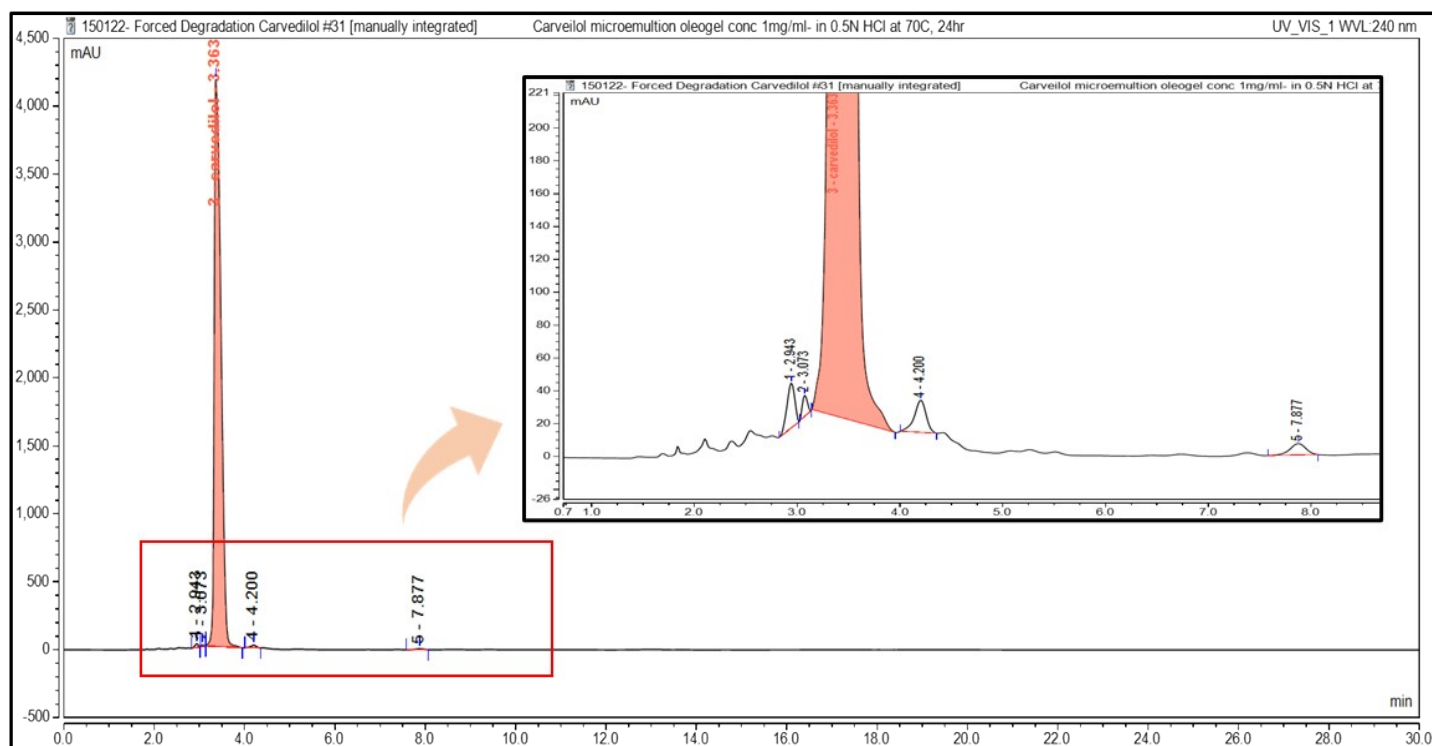

**Figure 27S.** HPLC chromatogram of acid hydrolysis of CARV-MEOG, 0.5 M HCl for 24 h at 70 °C.

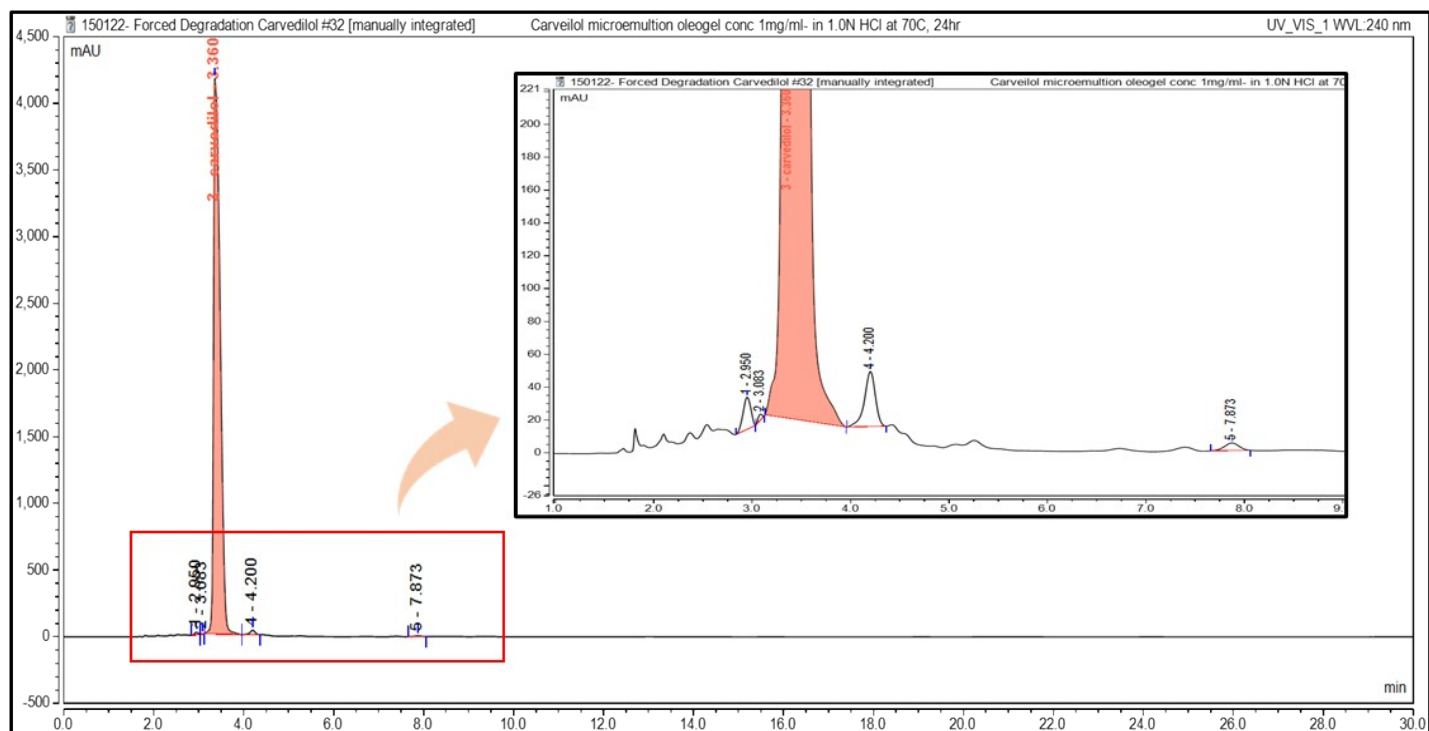

**Figure 28S.** HPLC chromatogram of acid hydrolysis of CARV-MEOG, 1.0 M HCl for 24 h at 70 °C.

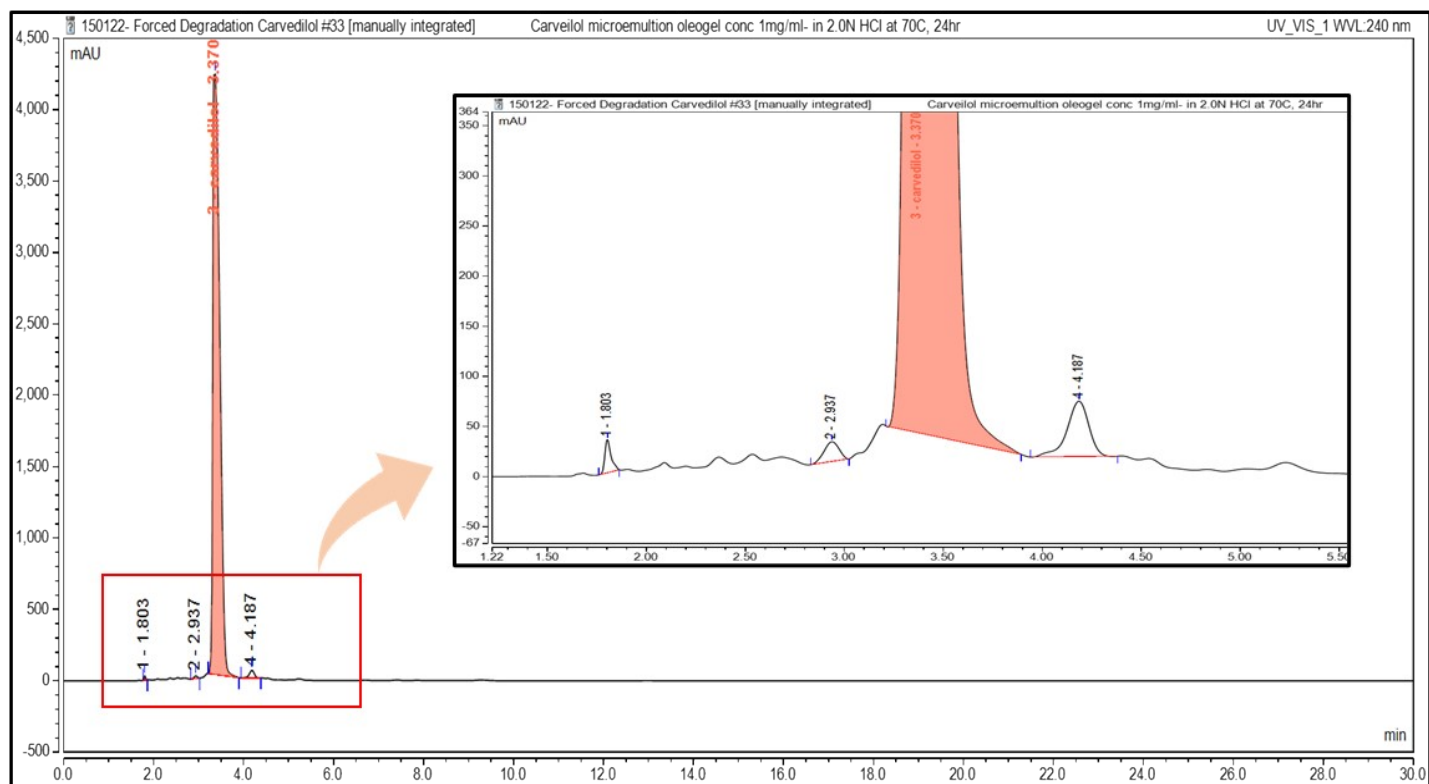

**Figure 29S.** HPLC chromatogram of acid hydrolysis of CARV-MEOG, 2.0 M HCl for 24 h at 70 °C.

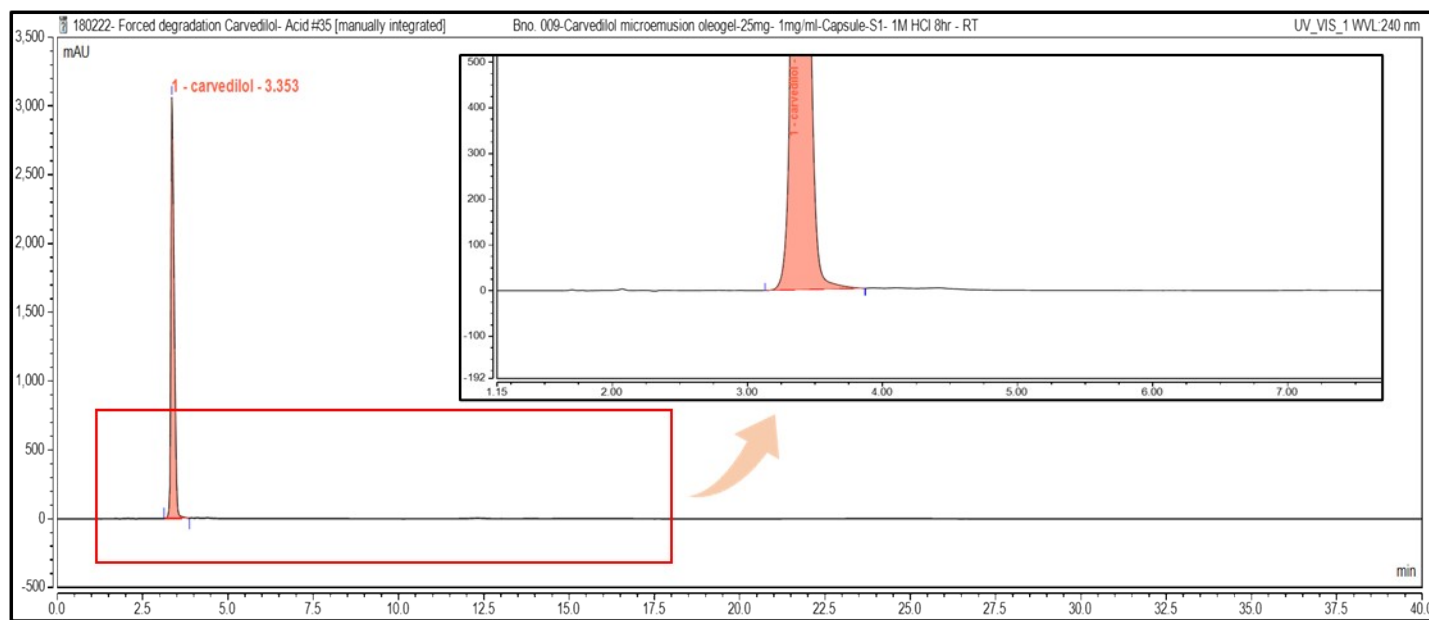

**Figure 30S.** HPLC chromatogram of acid hydrolysis of CARV-MEOG, 1.0 M HCl for 8 h at RT.

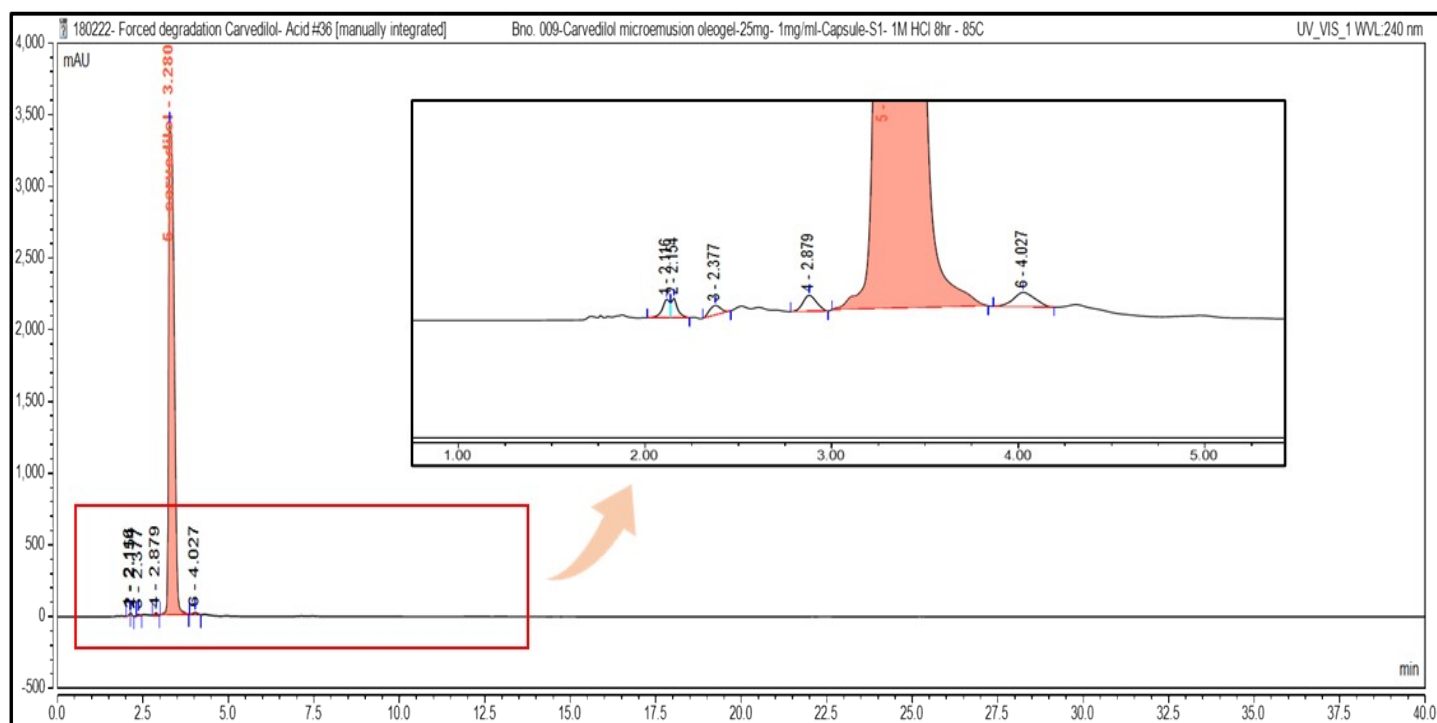

**Figure 31S.** HPLC chromatogram of acid hydrolysis of CARV-MEOG, 1.0 M HCl for 8 h at 85 °C.

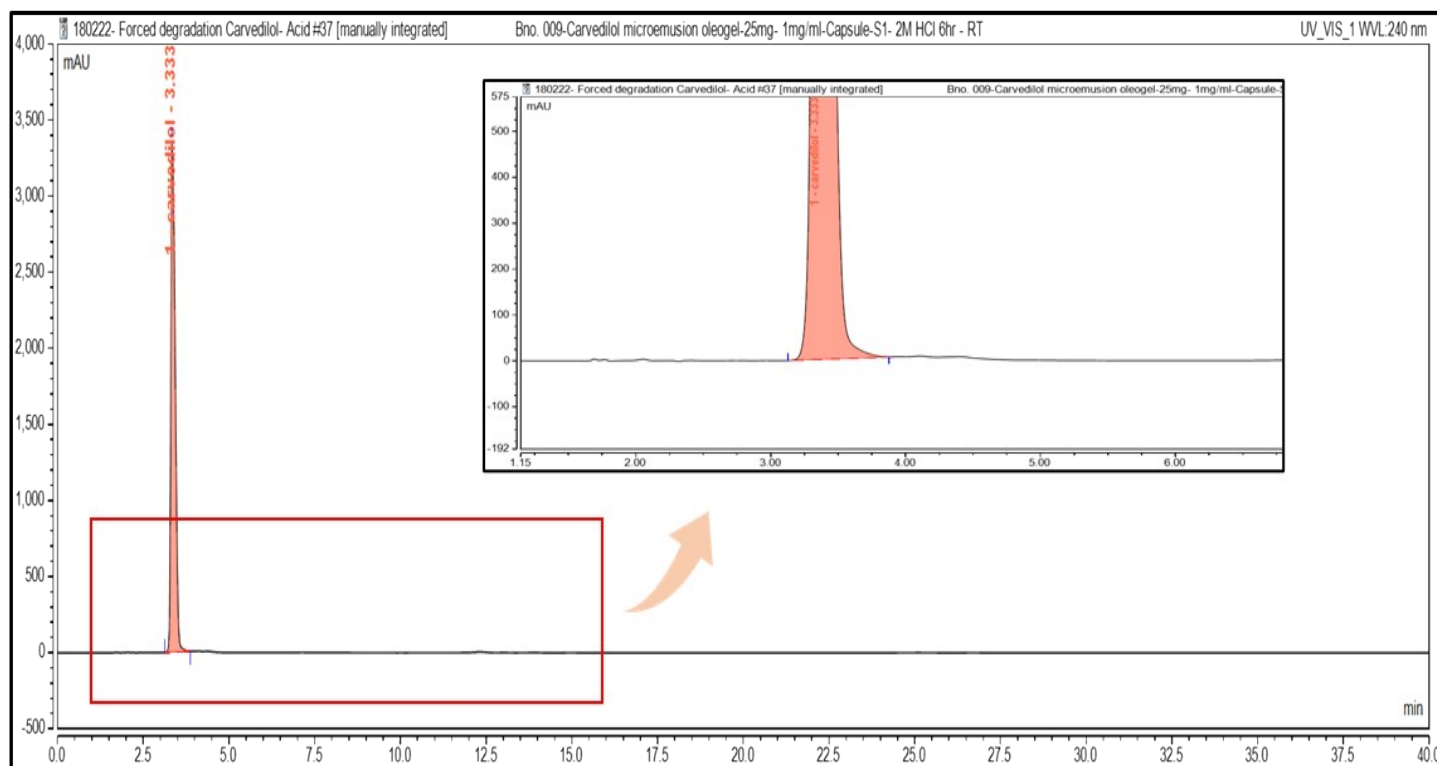

**Figure 32S.** HPLC chromatogram of acid hydrolysis of CARV-MEOG, 2.0 M HCl for 6 h at RT.



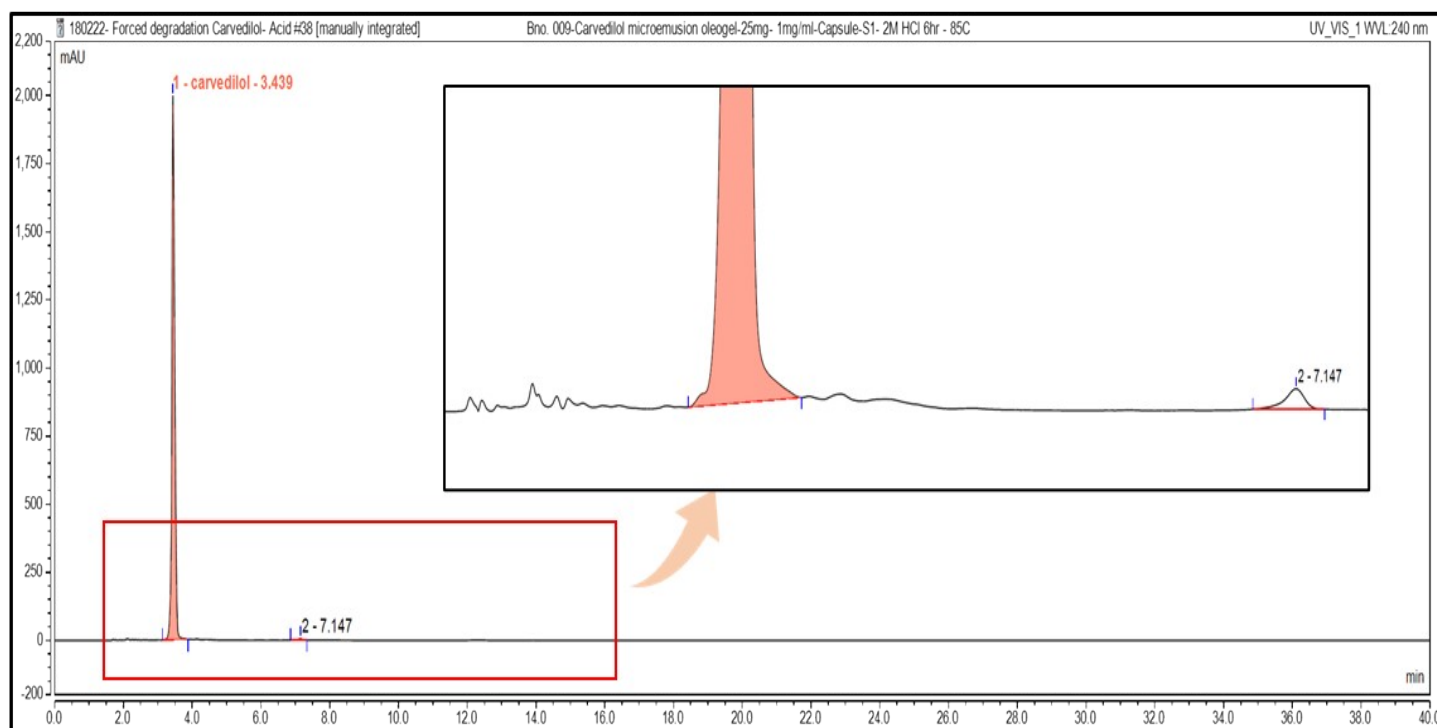

**Figure 33S.** HPLC chromatogram of acid hydrolysis of CARV-MEOG, 2.0 M HCl for 6 h at 85 °C.

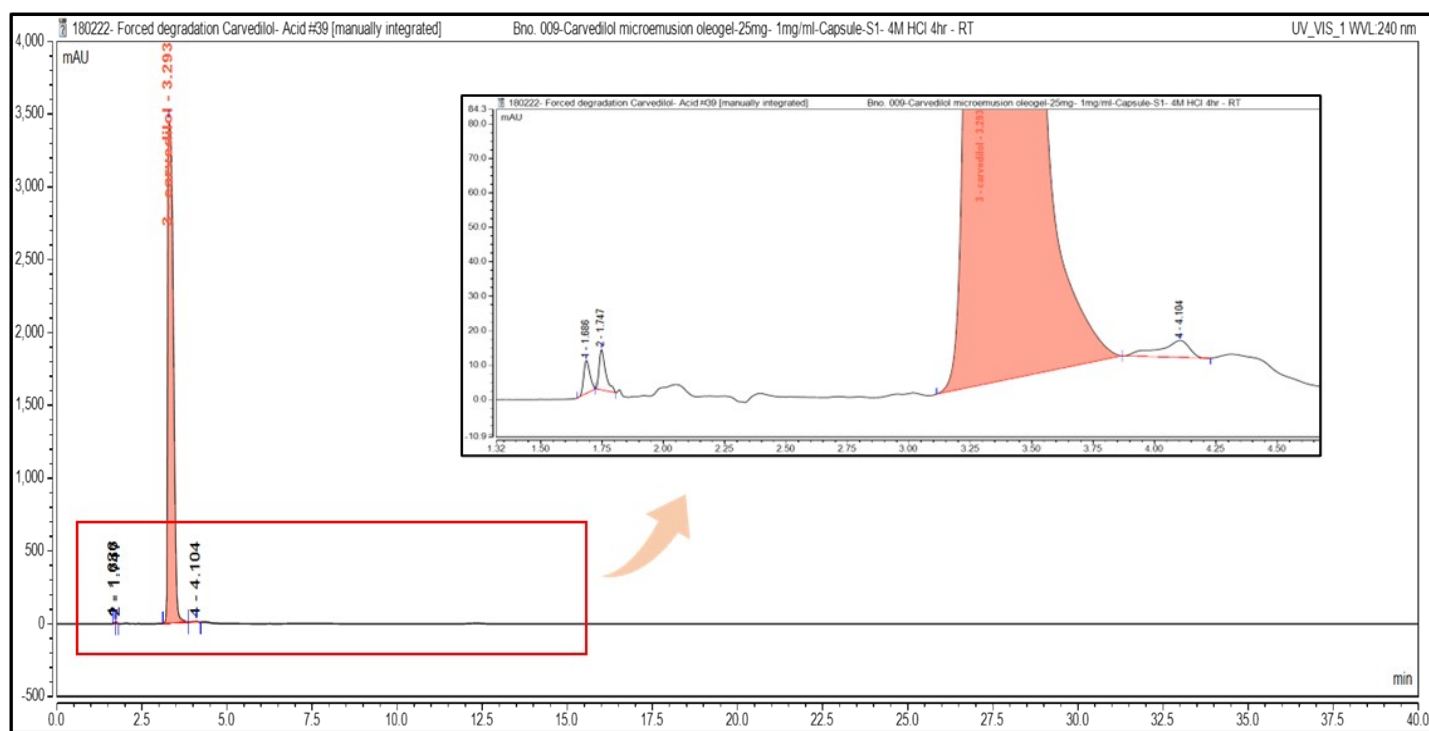

**Figure 34S.** HPLC chromatogram of acid hydrolysis of CARV-MEOG, 4.0 M HCl for 4 h at RT.

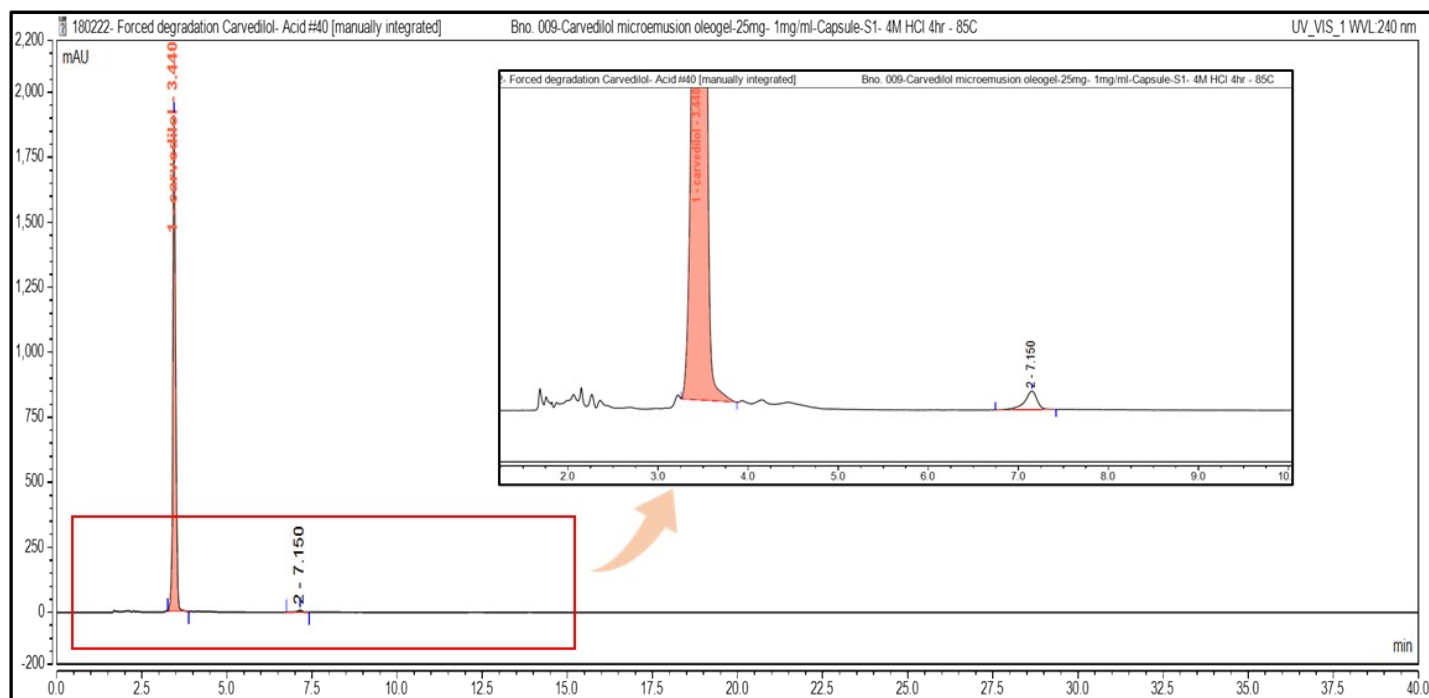

**Figure 35S.** HPLC chromatogram of acid hydrolysis of CARV-MEOG, 4.0 M HCl for 4 h at 85 °C.

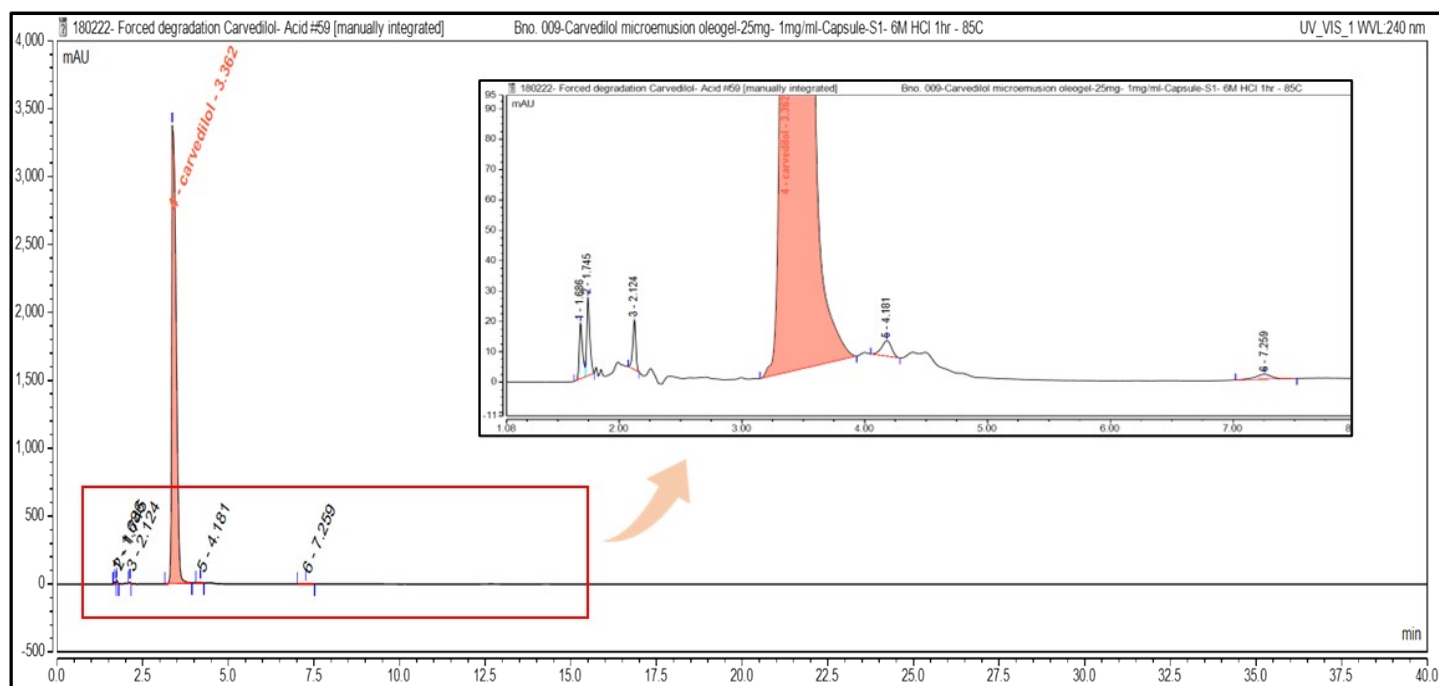

**Figure 36S.** HPLC chromatogram of acid hydrolysis of CARV-MEOG, 6.0 M HCl for 1 h at 85 °C.

**Excipient- Microemulsion Loaded Oleogel- Acid Hydrolysis:**

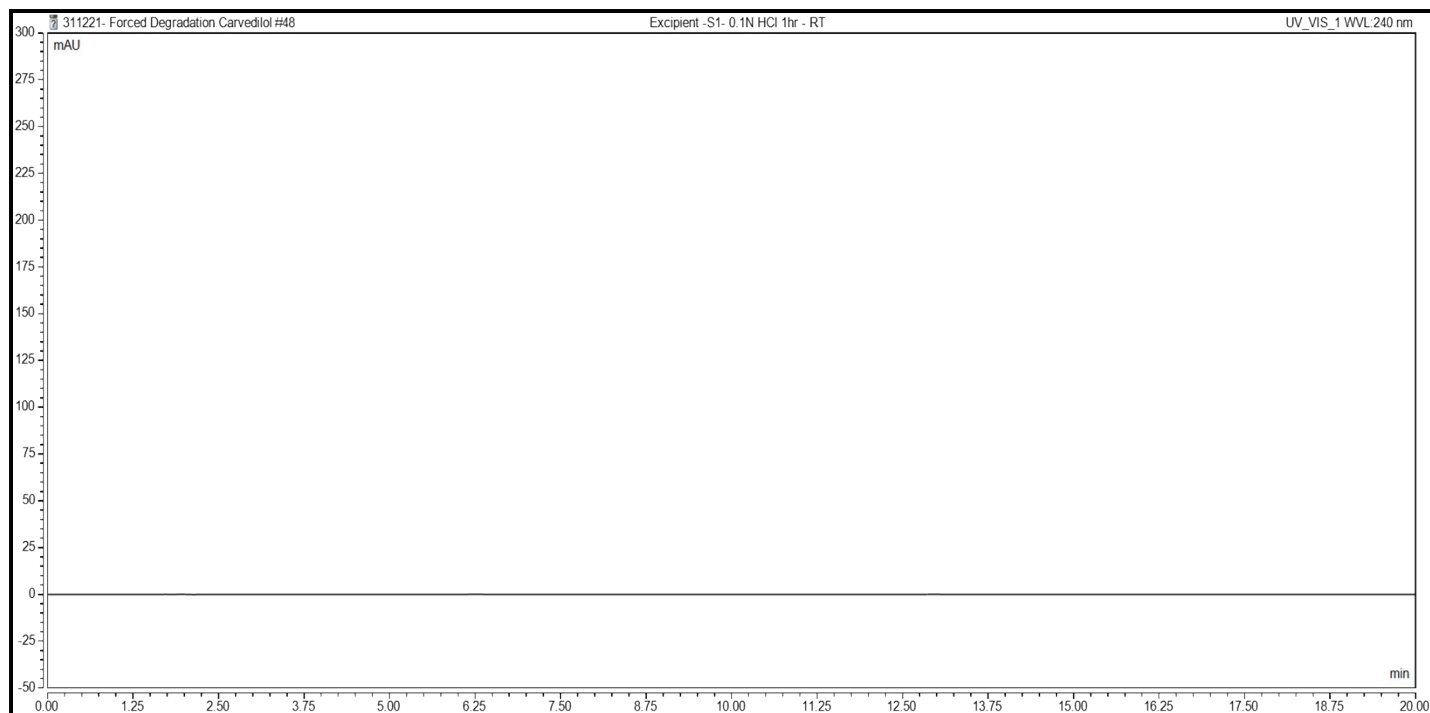

**Figure 37S.** HPLC chromatogram of acid hydrolysis of excipients, 0.1 M HCl for 1 h at RT.

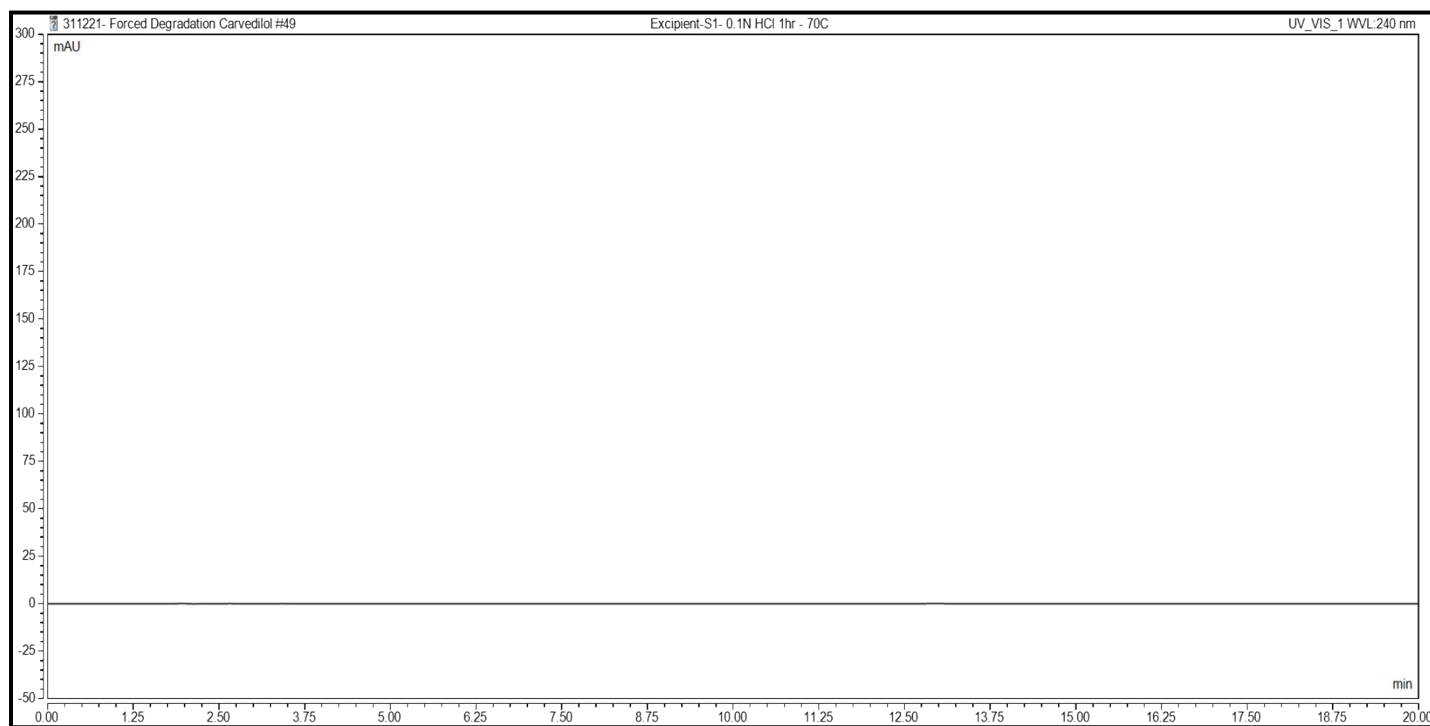

**Figure 38S.** HPLC chromatogram of acid hydrolysis of excipients, 0.1 M HCl for 1 h at 70 °C.

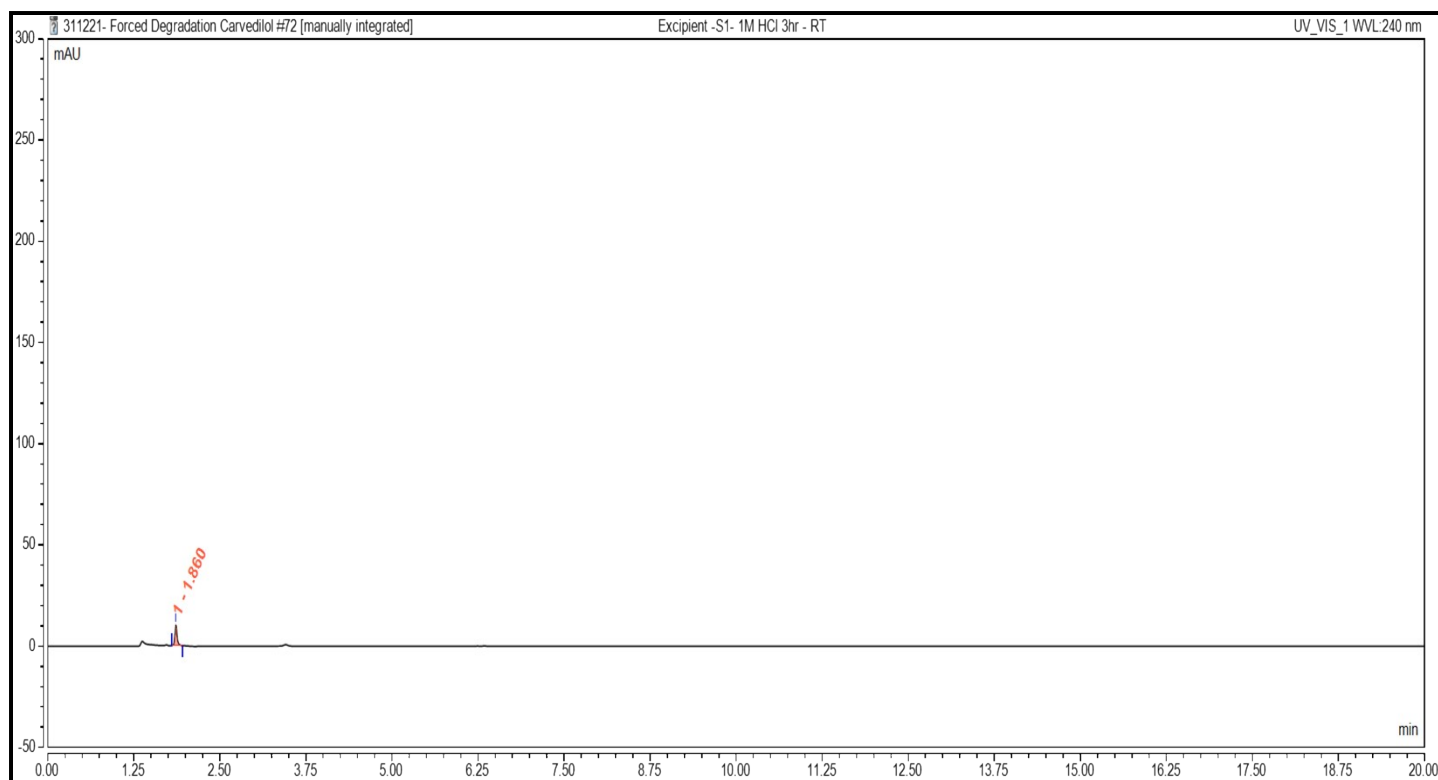

**Figure 39S.** HPLC chromatogram of acid hydrolysis of excipients, 1.0 M HCl for 3 h at RT.

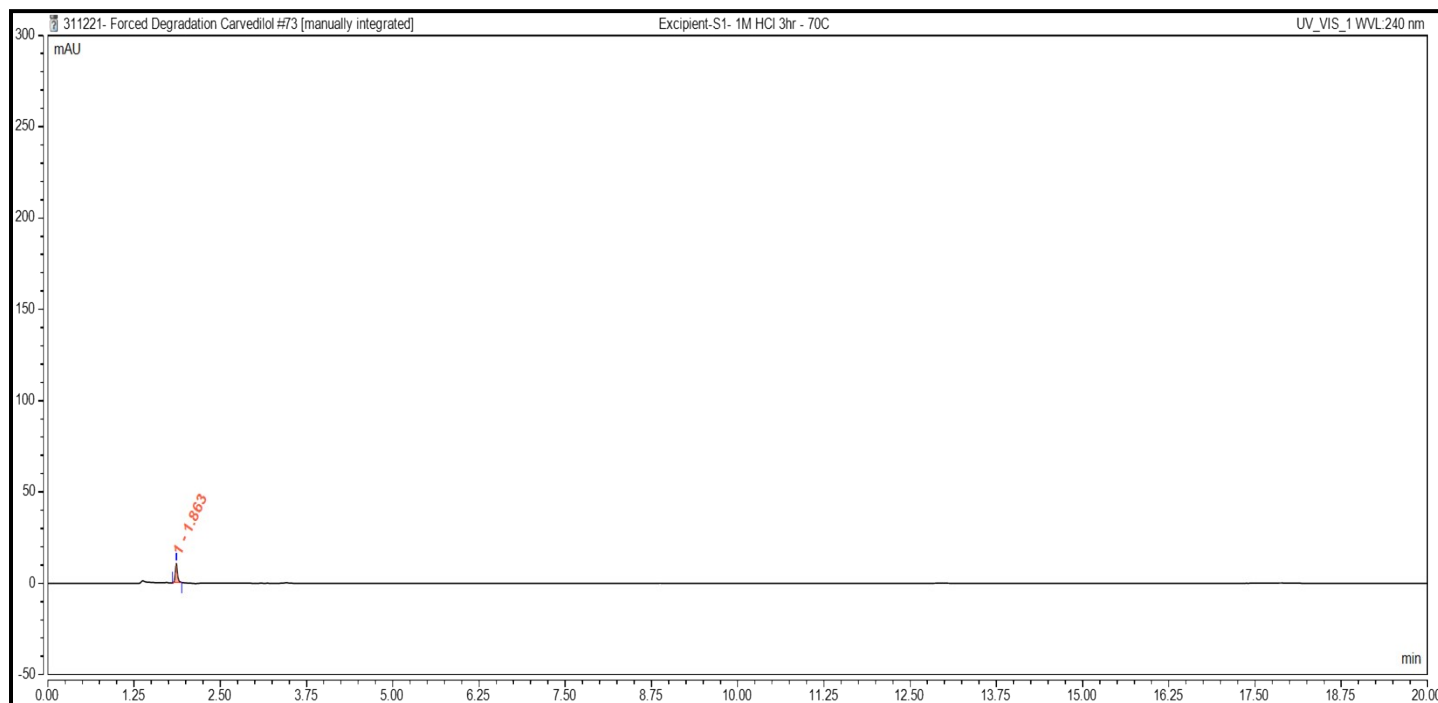

**Figure 40S.** HPLC chromatogram of acid hydrolysis of excipients, 1.0 M HCl for 3 h at 70 °C.

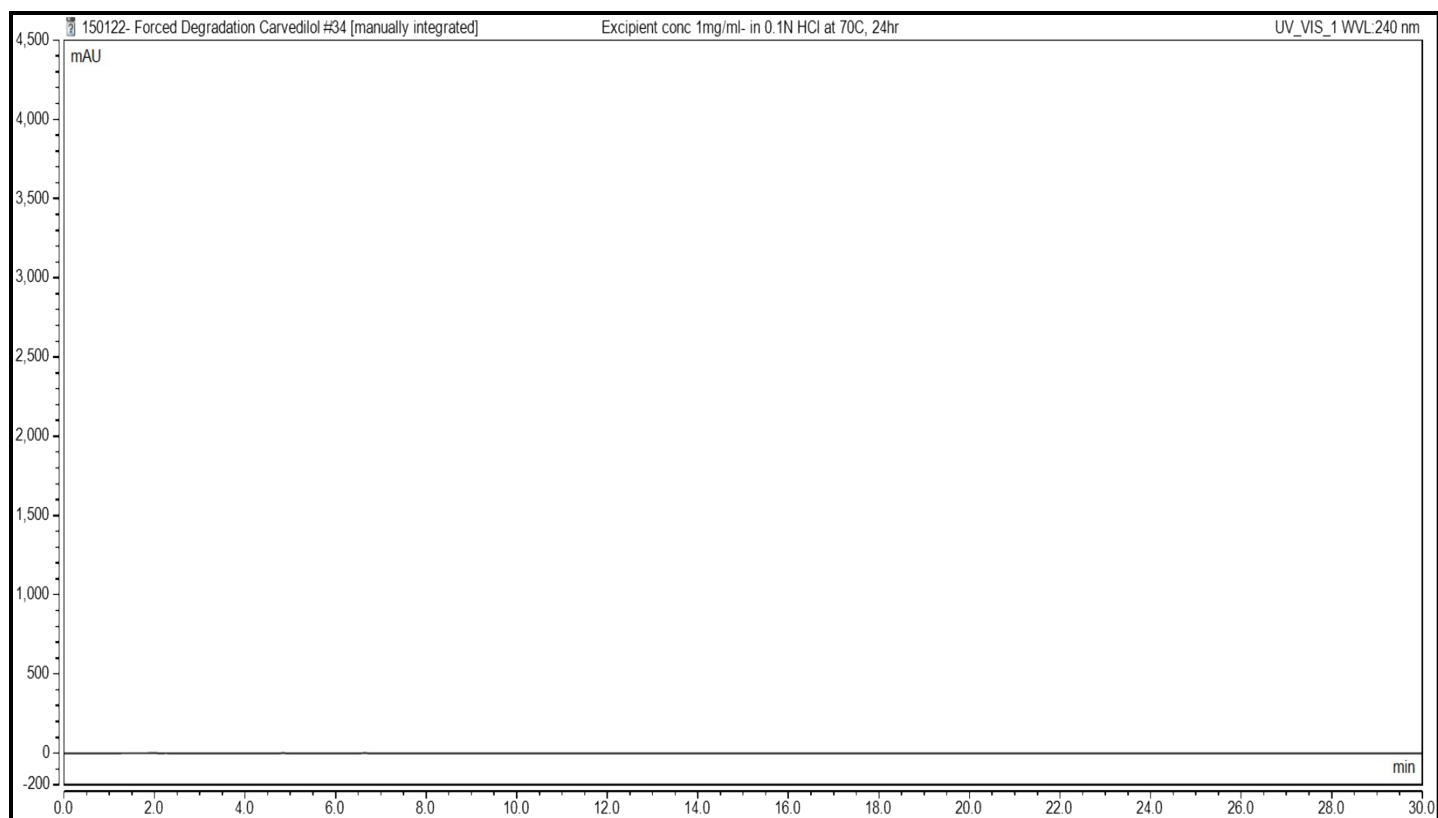

**Figure 41S.** HPLC chromatogram of acid hydrolysis of excipients, 0.1 M HCl for 24 h at 70 °C.

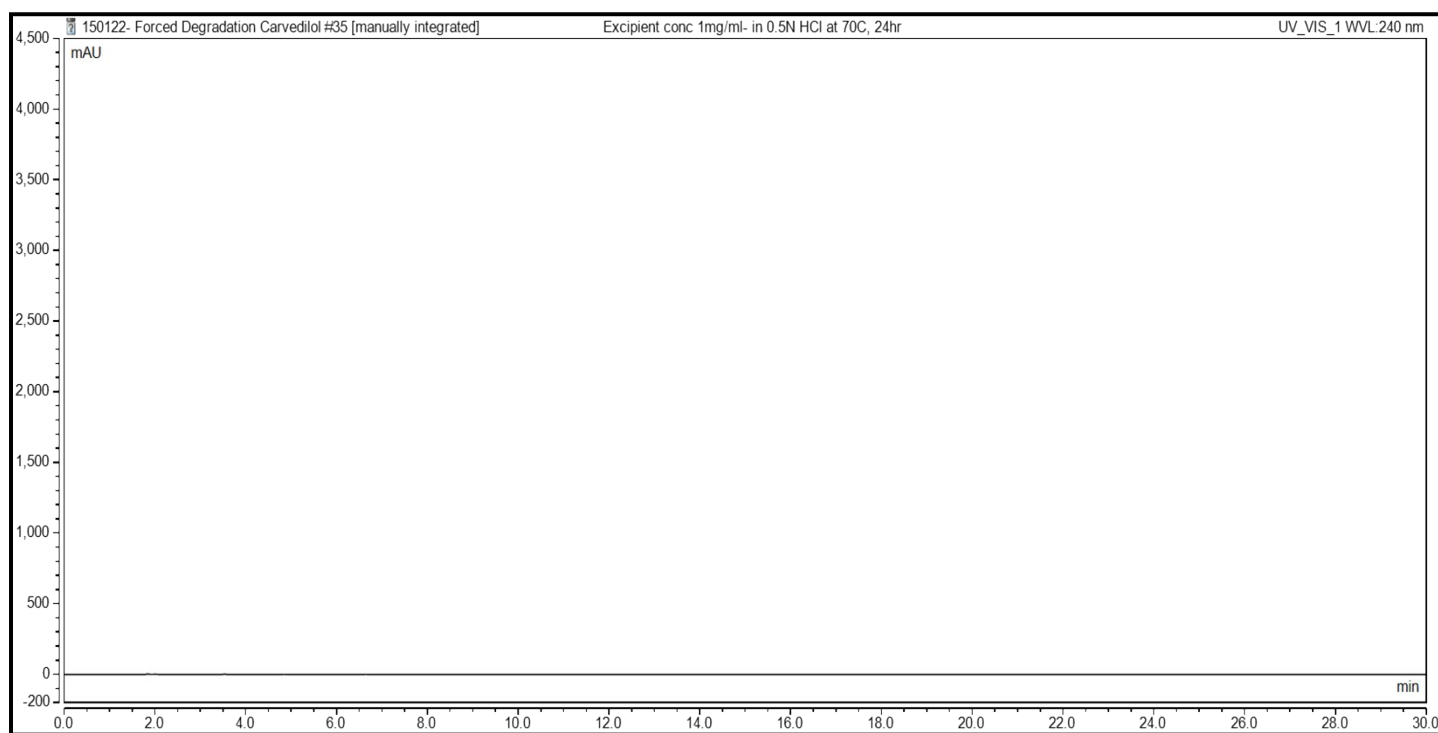

**Figure 42S.** HPLC chromatogram of acid hydrolysis of excipients, 0.5 M HCl for 24 h at 70 °C.

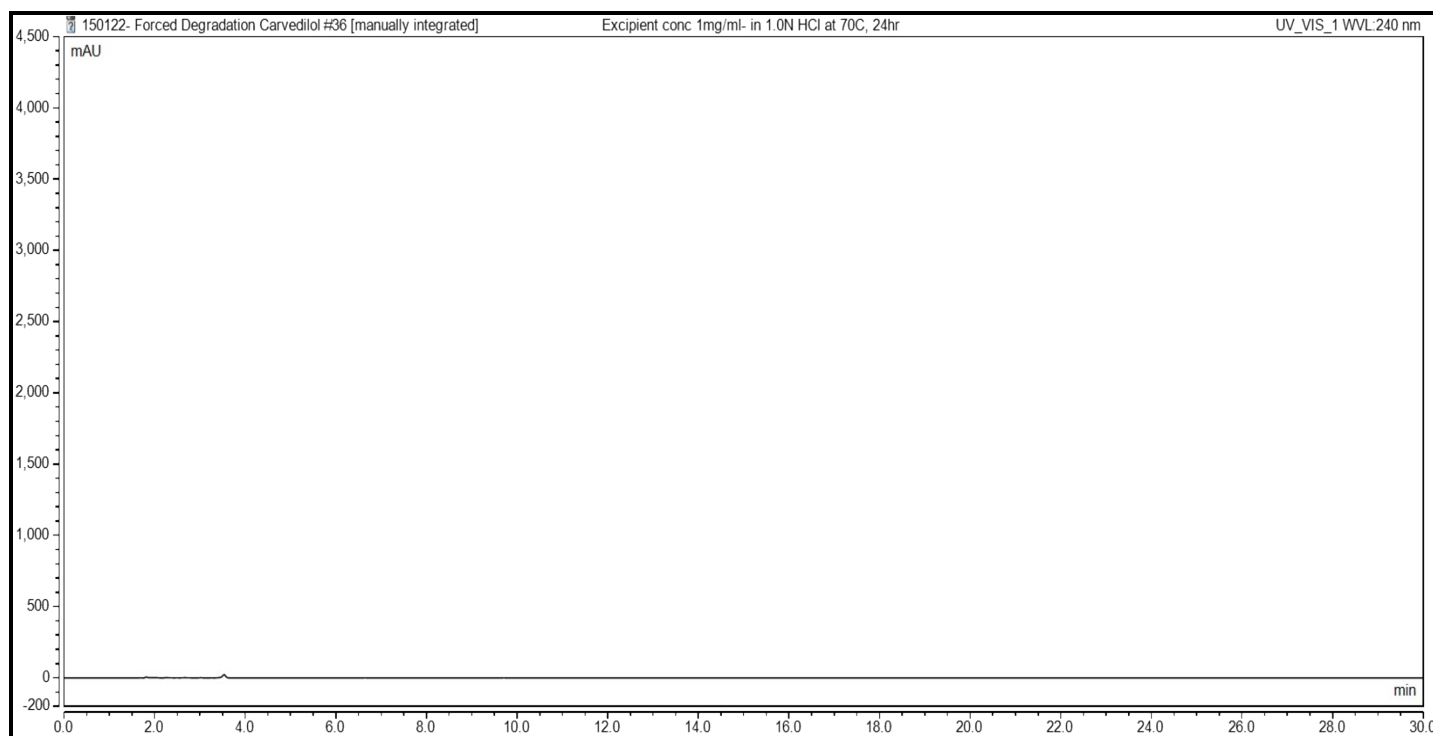

**Figure 43S.** HPLC chromatogram of acid hydrolysis of excipients, 1.0 M HCl for 24 h at 70 °C.

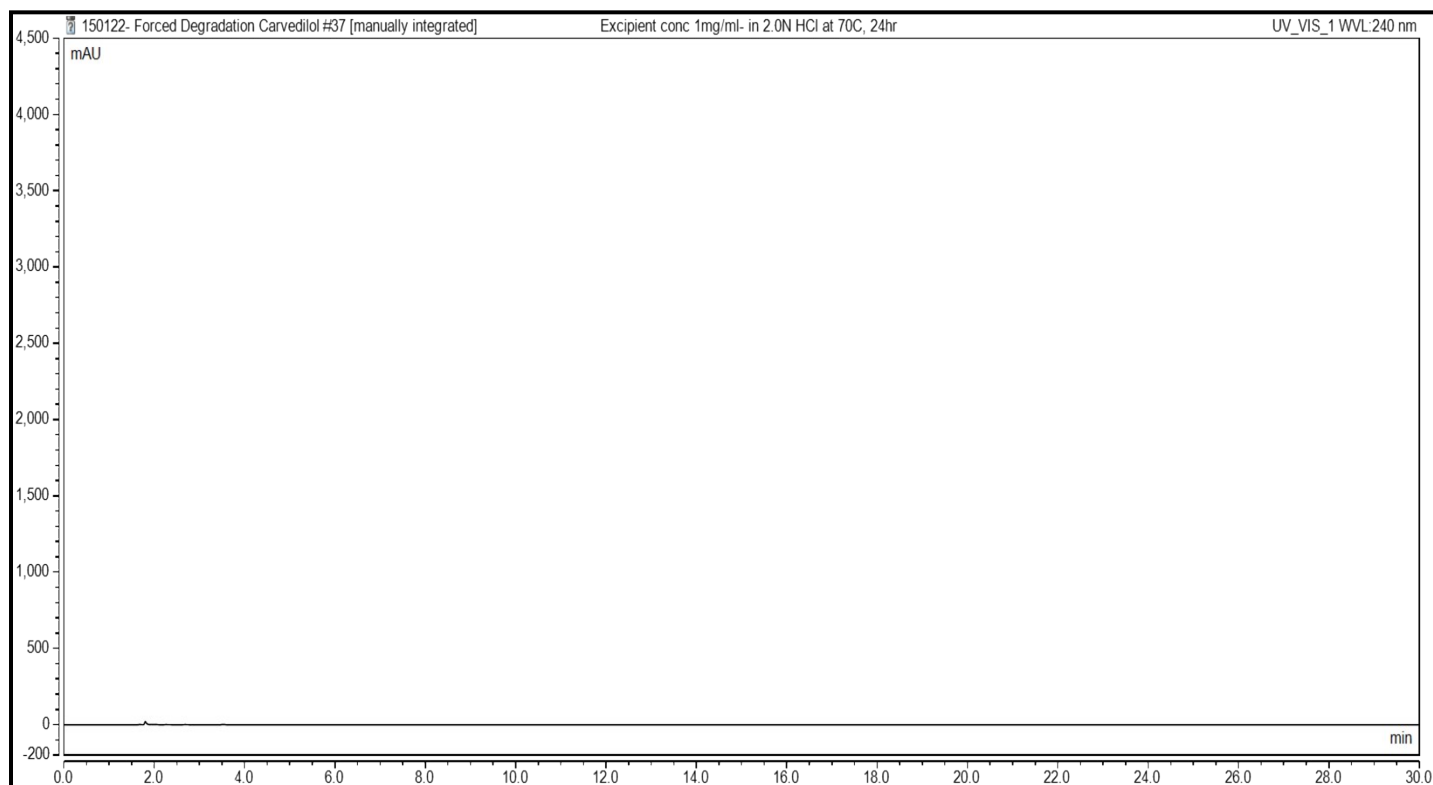

**Figure 44S.** HPLC Chromatogram of acid hydrolysis of excipients, 2.0 M HCl for 24 h at 70 °C.

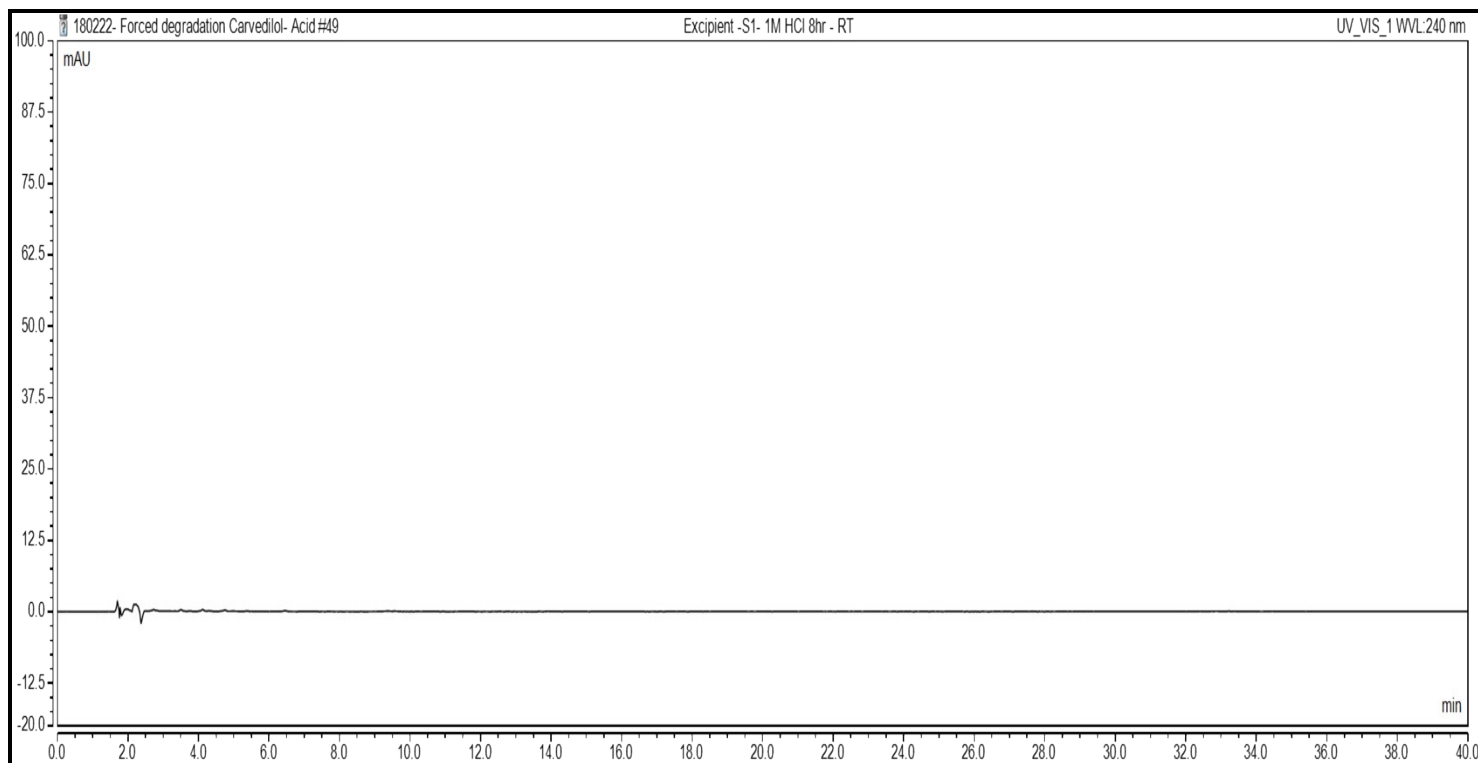

**Figure 45S.** HPLC chromatogram of acid hydrolysis of excipients, 1.0 M HCl for 8 h at RT.

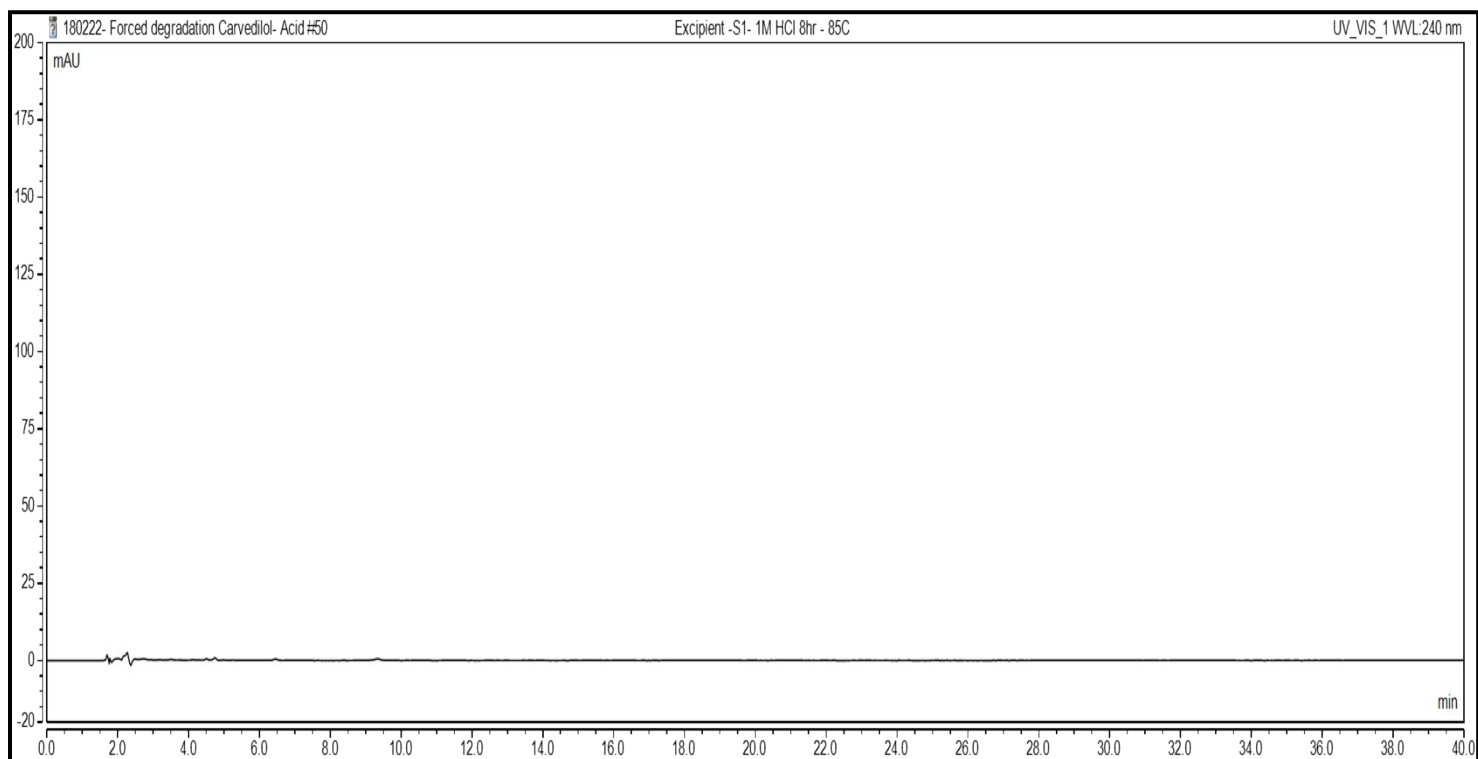

**Figure 46S.** HPLC chromatogram of acid hydrolysis of excipients, 1.0 M HCl for 8 h at 85 °C.

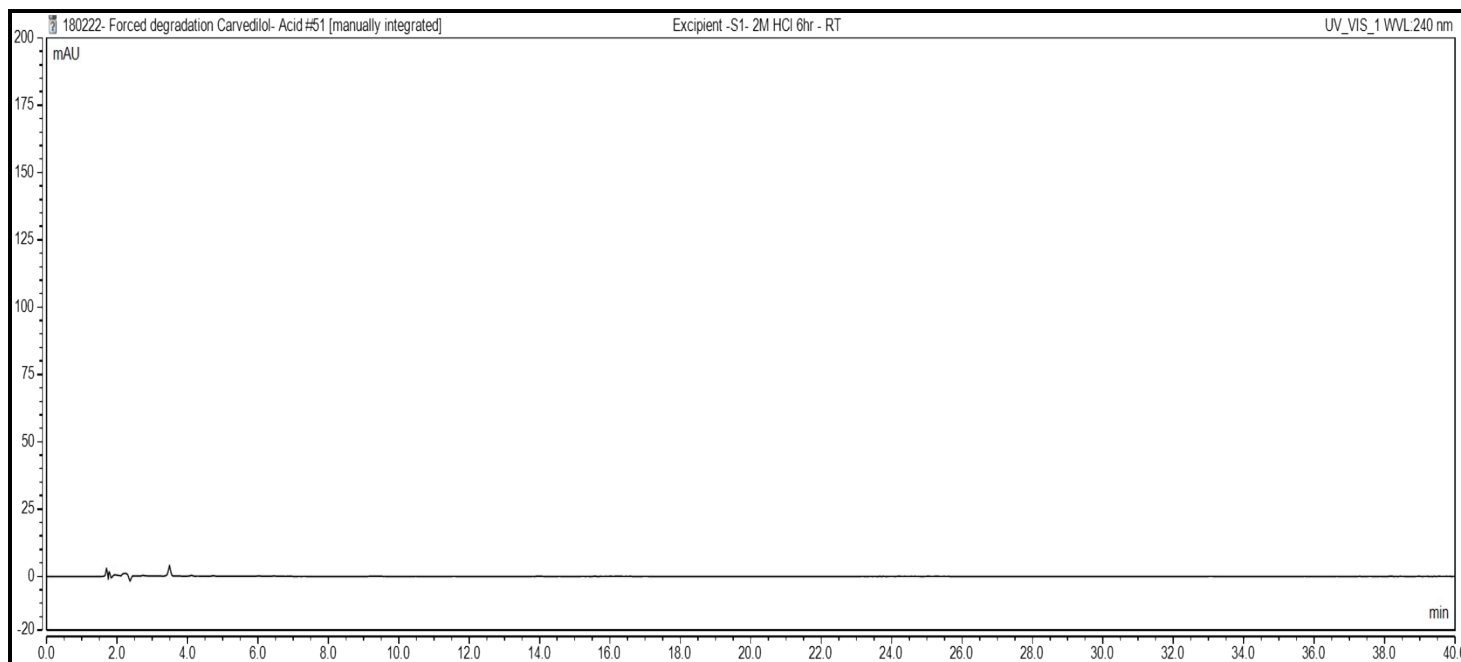

**Figure 47S.** HPLC chromatogram of acid hydrolysis of excipients, 2.0 M HCl for 6 h at RT.

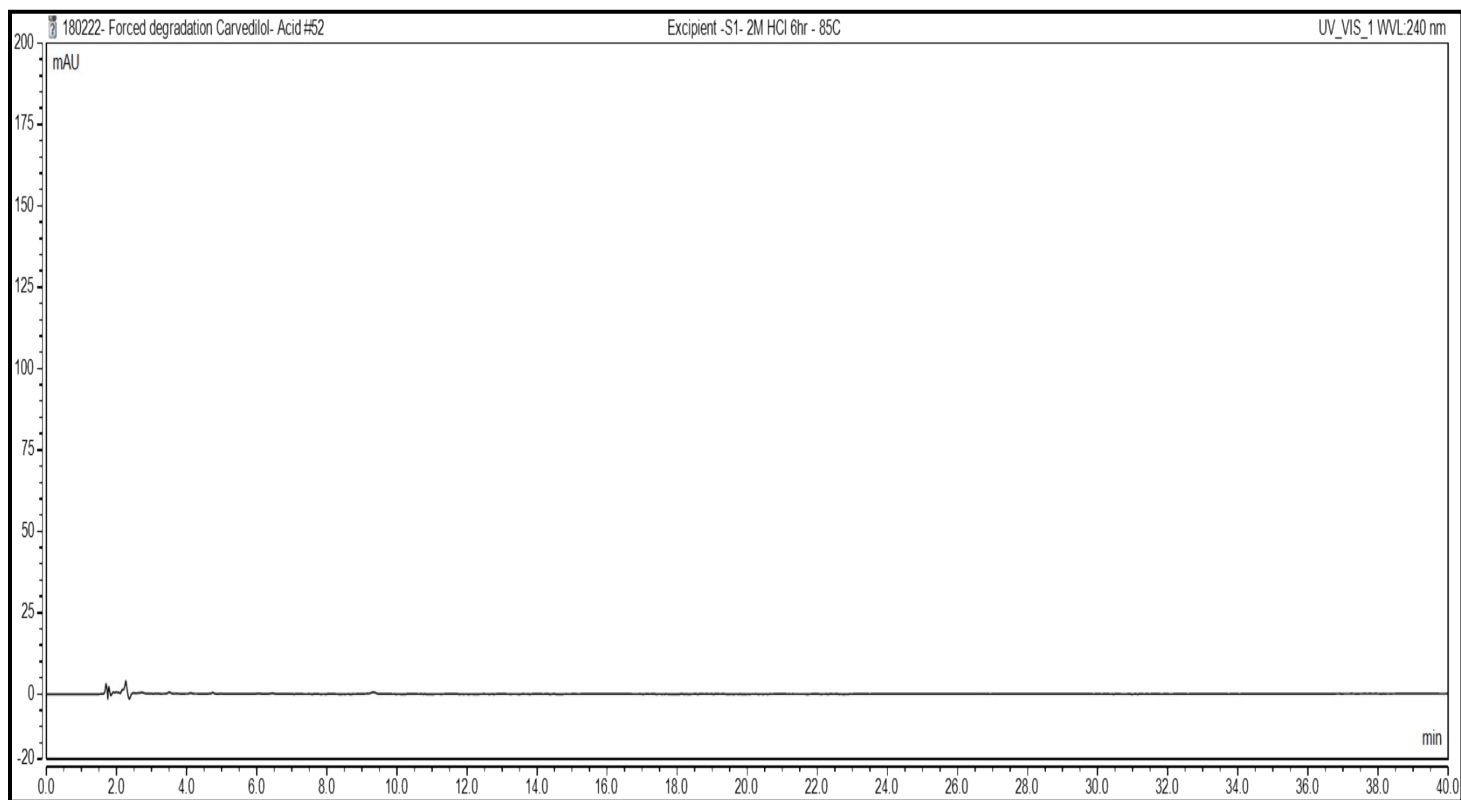

**Figure 48S.** HPLC chromatogram of acid hydrolysis of excipients, 2.0 M HCl for 6 h at 85 °C.



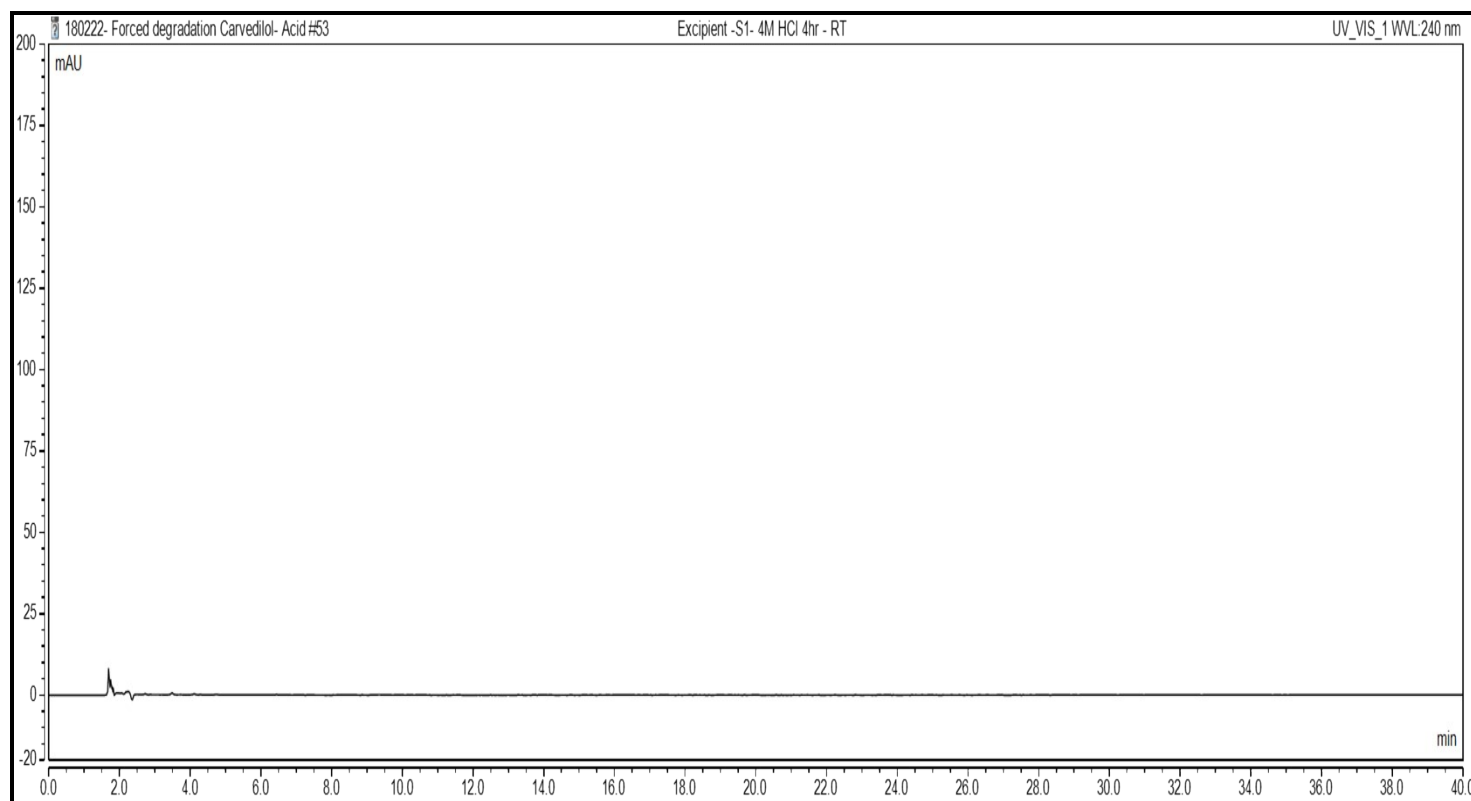

**Figure 49S.** HPLC chromatogram of acid hydrolysis of excipients, 4.0 M HCl for 4 h at RT.

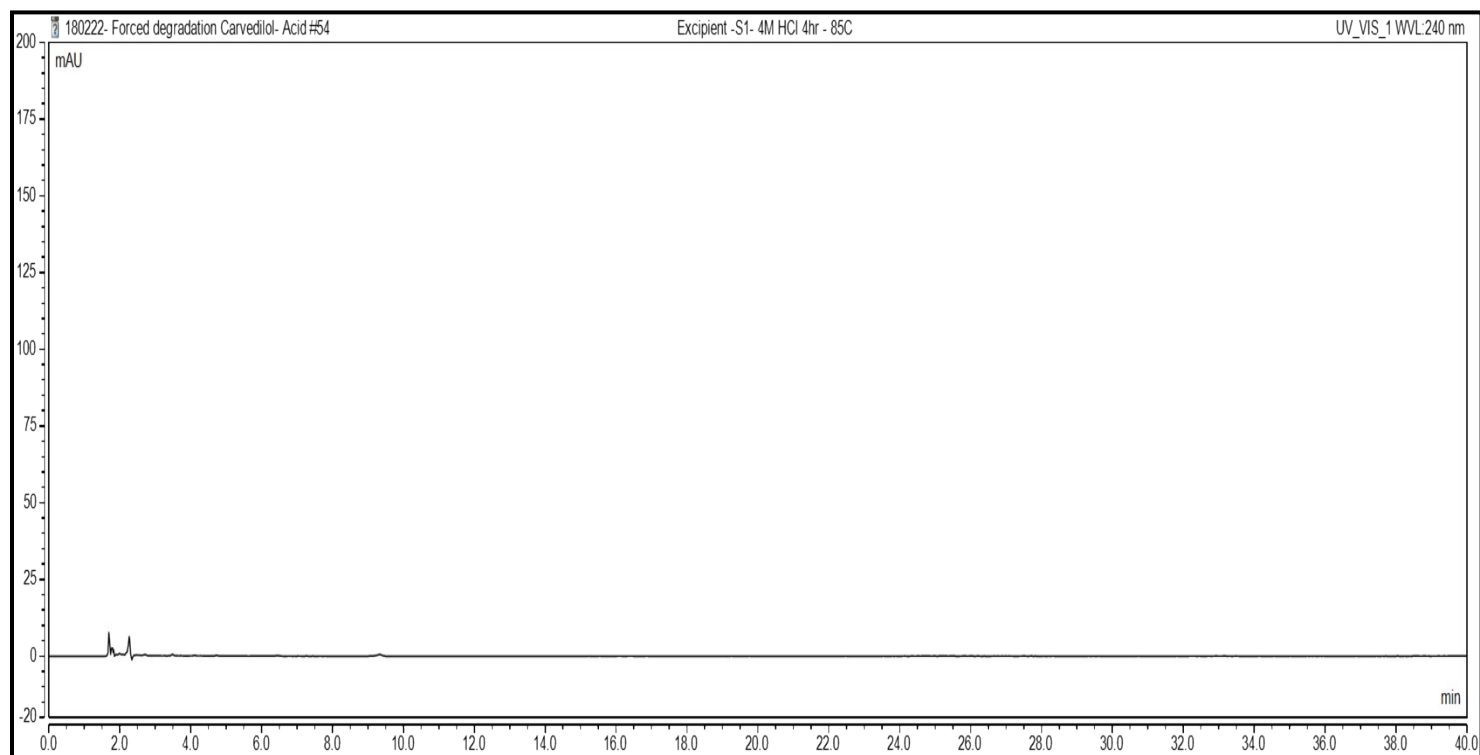

**Figure 50S.** HPLC chromatogram of acid hydrolysis of excipients, 4.0 M HCl for 4 h at 85 °C.

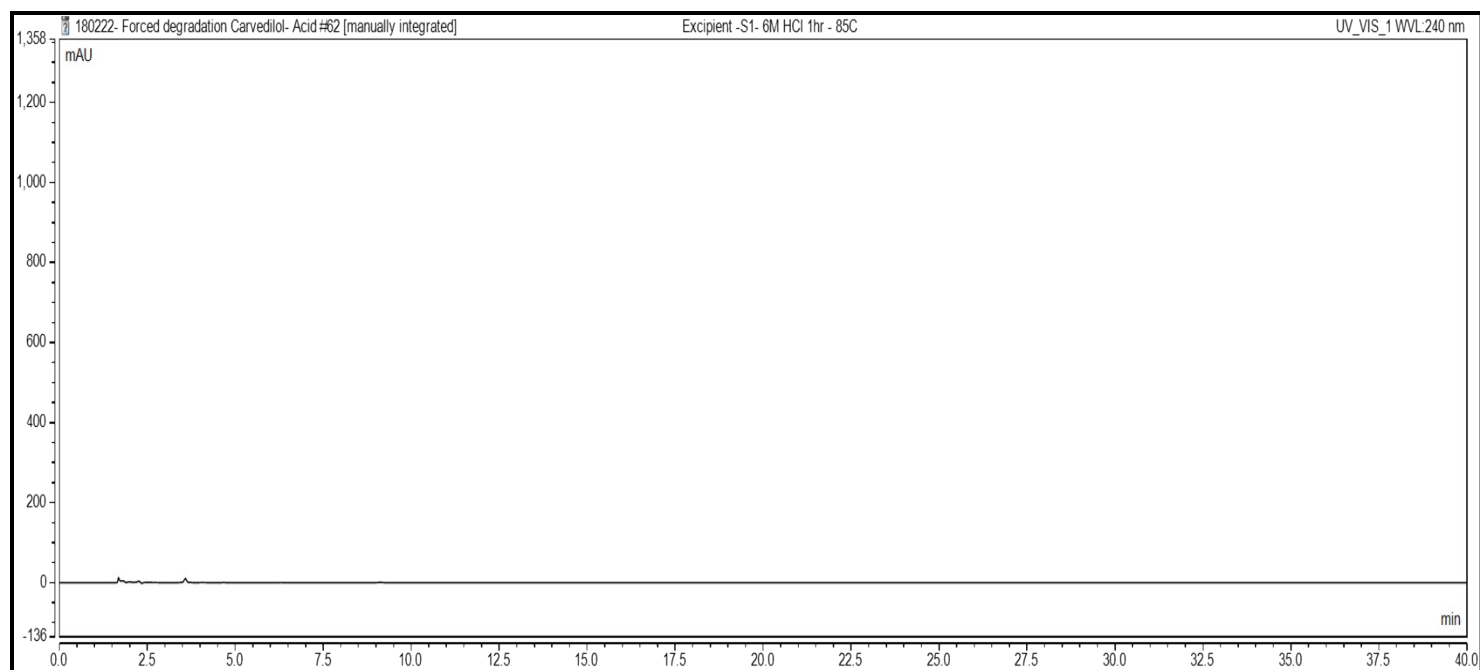

**Figure 51S.** HPLC chromatogram of acid hydrolysis of excipients, 6.0 M HCl for 1 h at 85 °C.

## Base Degradation: CARV

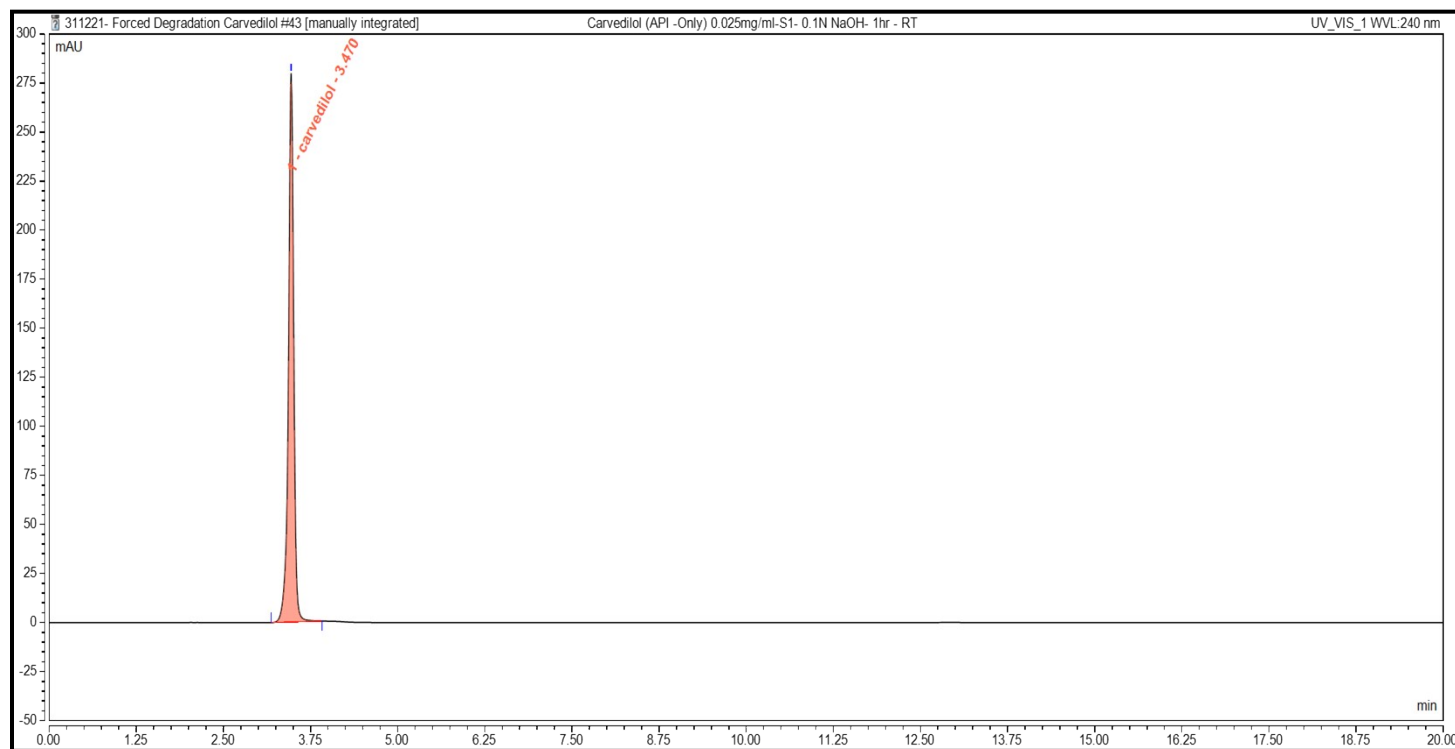

**Figure 52S.** HPLC chromatogram of base hydrolysis of CARV, 0.1 M NaOH for 1 h at RT.

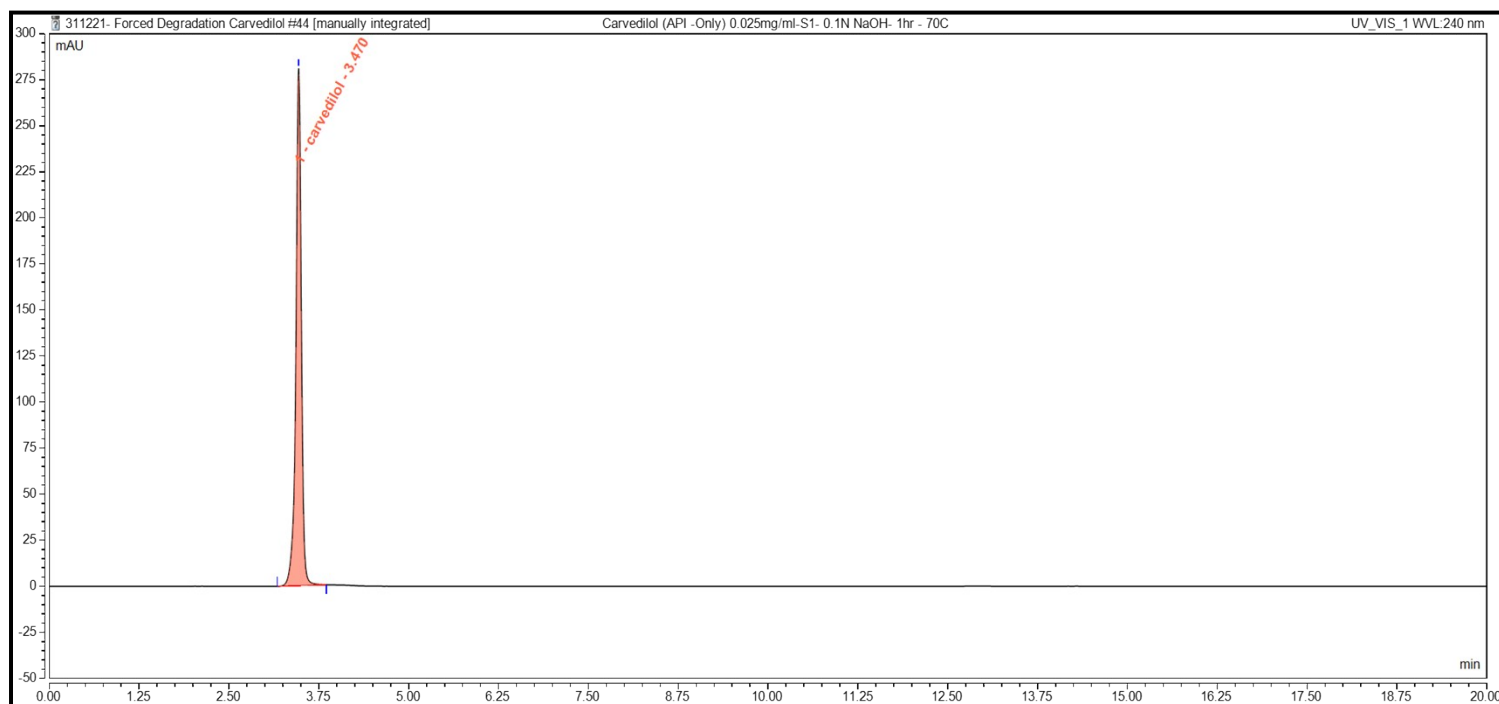

**Figure 53S.** HPLC chromatogram of base hydrolysis of CARV, 0.1 M NaOH for 1 h at 70 °C.

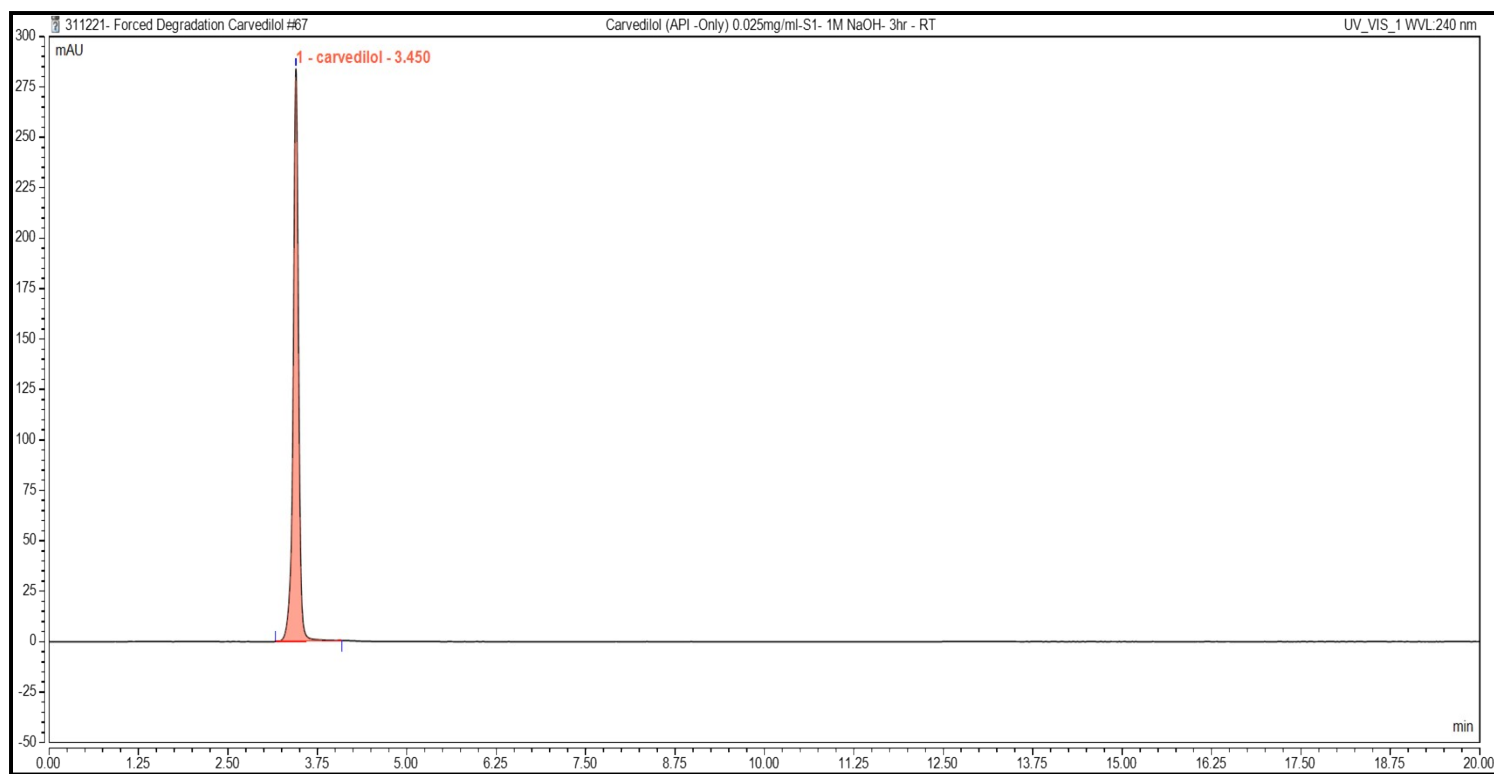

**Figure 54S.** HPLC chromatogram of base hydrolysis of CARV, 1.0 M NaOH for 3 h at RT.

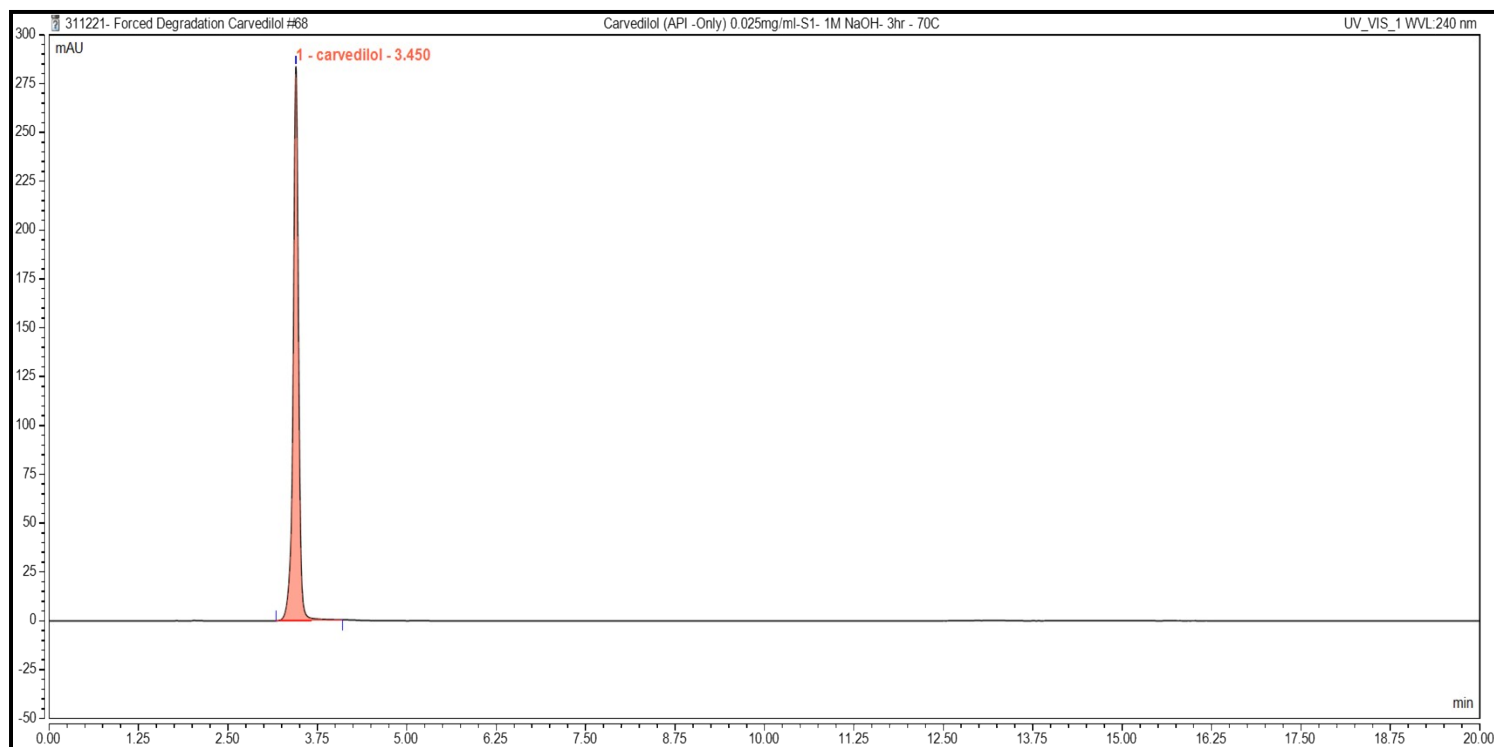

**Figure 55S.** HPLC chromatogram of base hydrolysis of CARV, 1.0 M NaOH for 3 h at 70 °C.

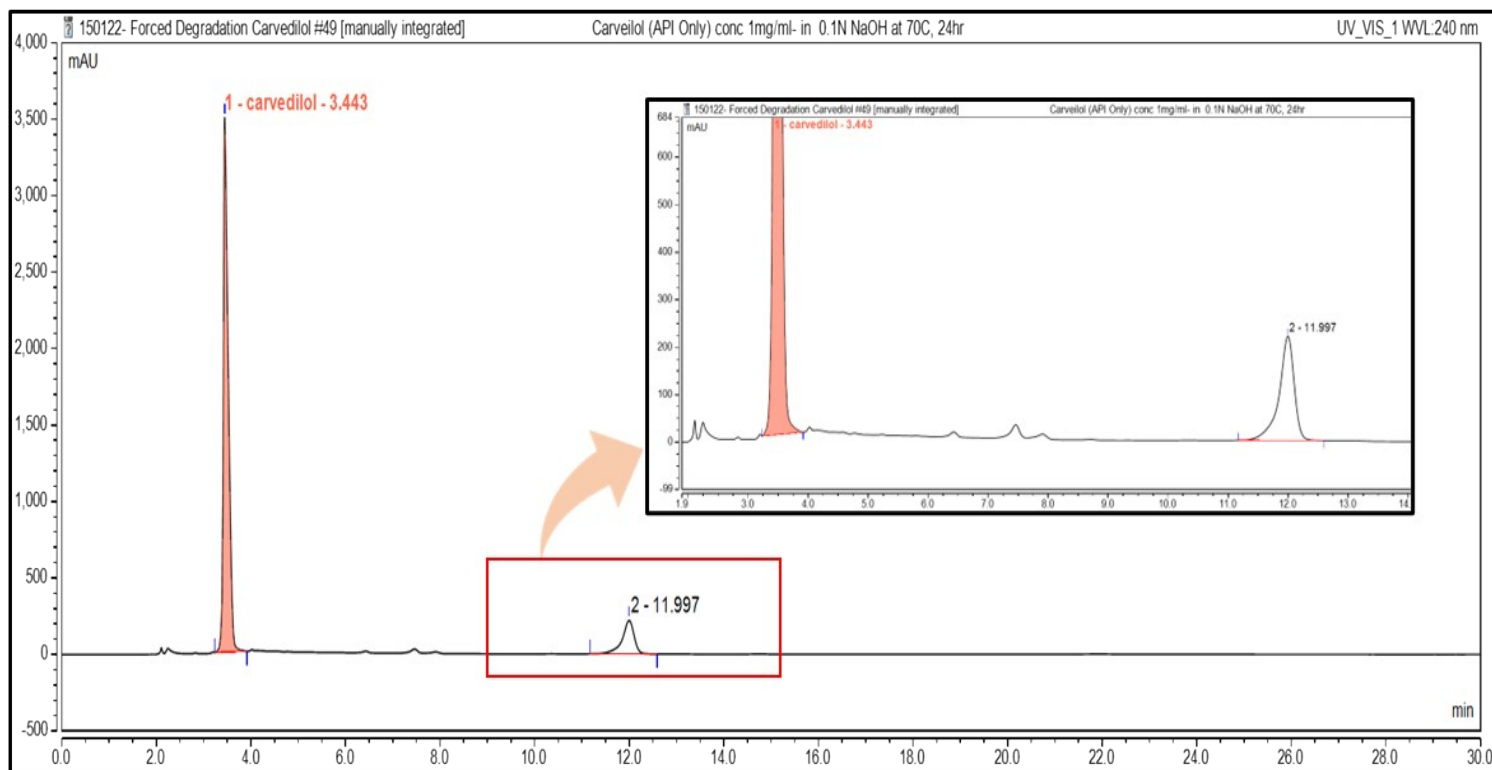

**Figure 56S.** HPLC chromatogram of base hydrolysis of CARV, 0.1 M NaOH for 24 h at 70 °C.

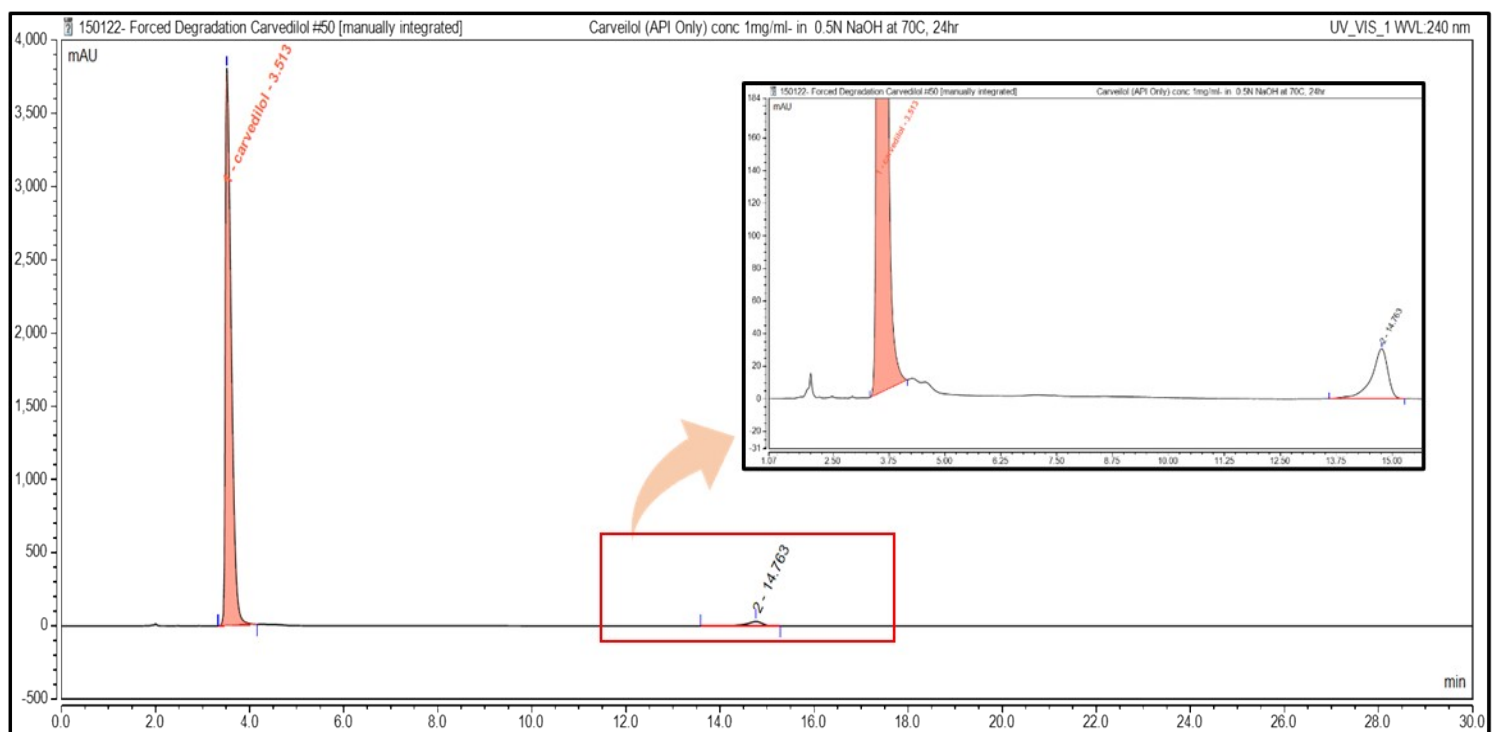

**Figure 57S.** HPLC chromatogram of base hydrolysis of CARV, 0.5 M NaOH for 24 h at 70 °C.

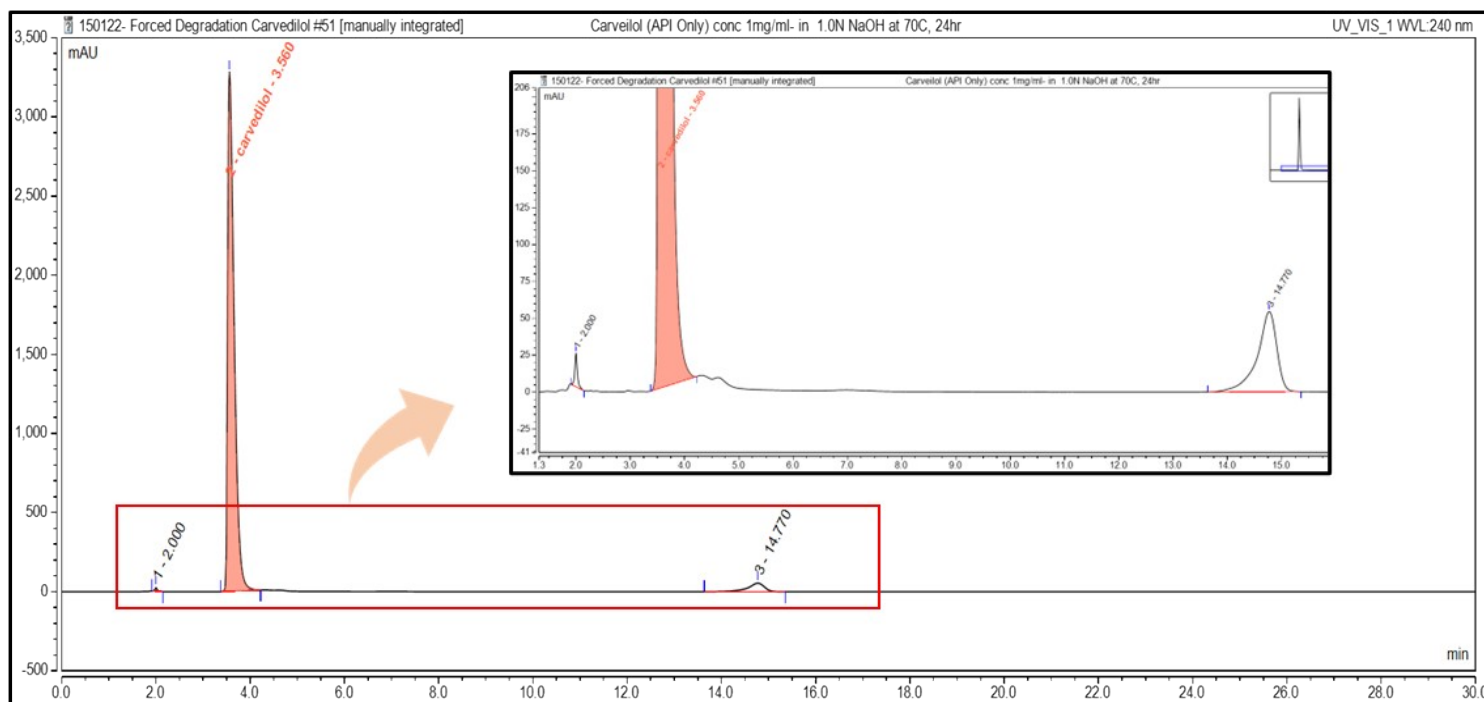

**Figure 58S.** HPLC chromatogram of base hydrolysis of CARV, 1.0 M NaOH for 24 h at 70 °C.

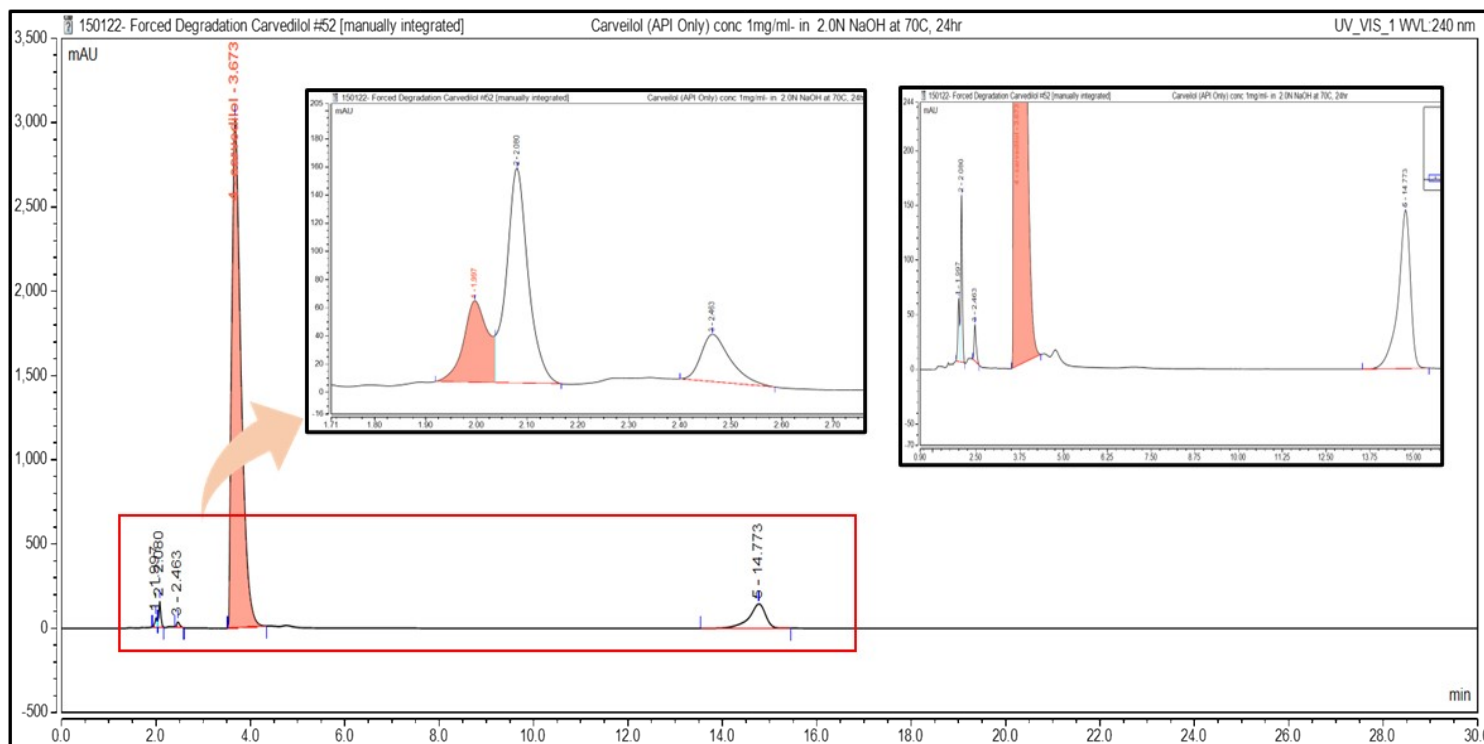

**Figure 59S.** HPLC chromatogram of base hydrolysis of CARV, 2.0 M NaOH for 24 h at 70 °C.

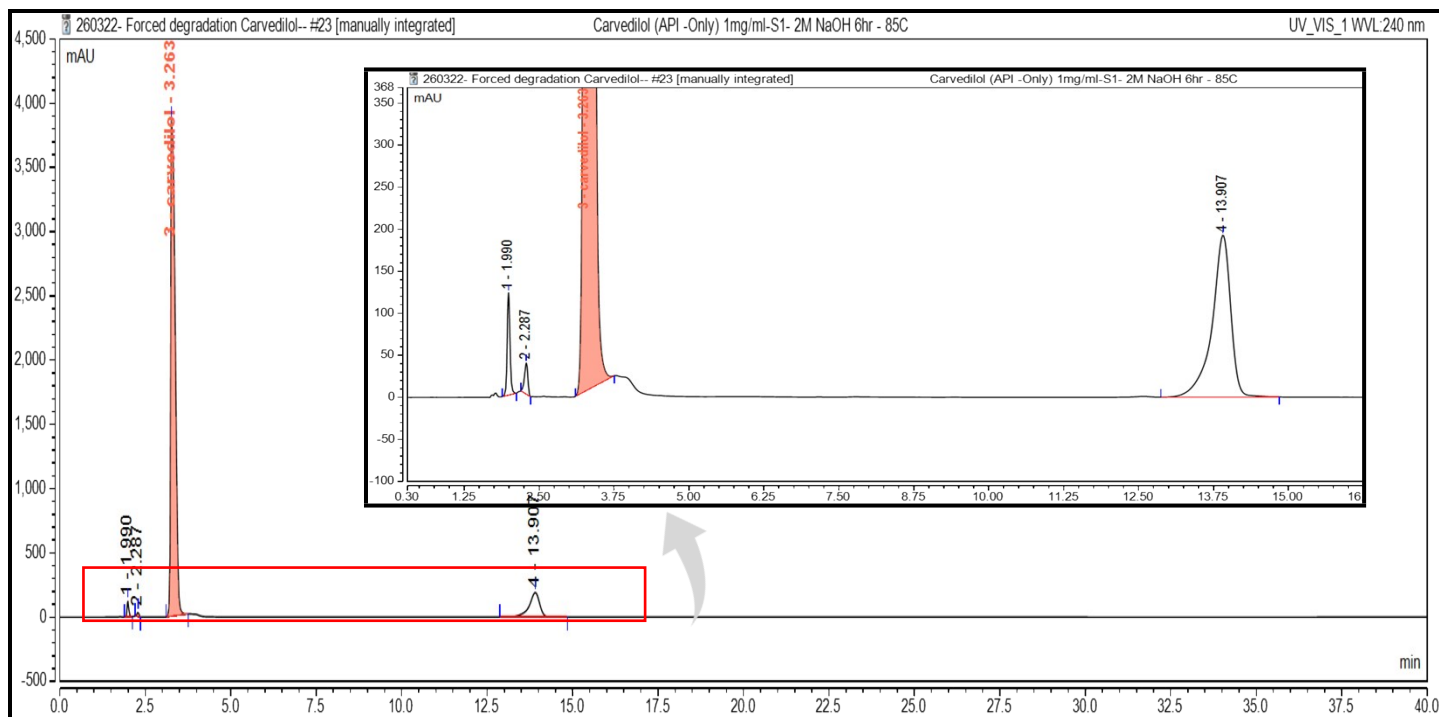

**Figure 60S.** HPLC chromatogram of base hydrolysis of CARV, 2.0 M NaOH for 6 h at 85 °C.

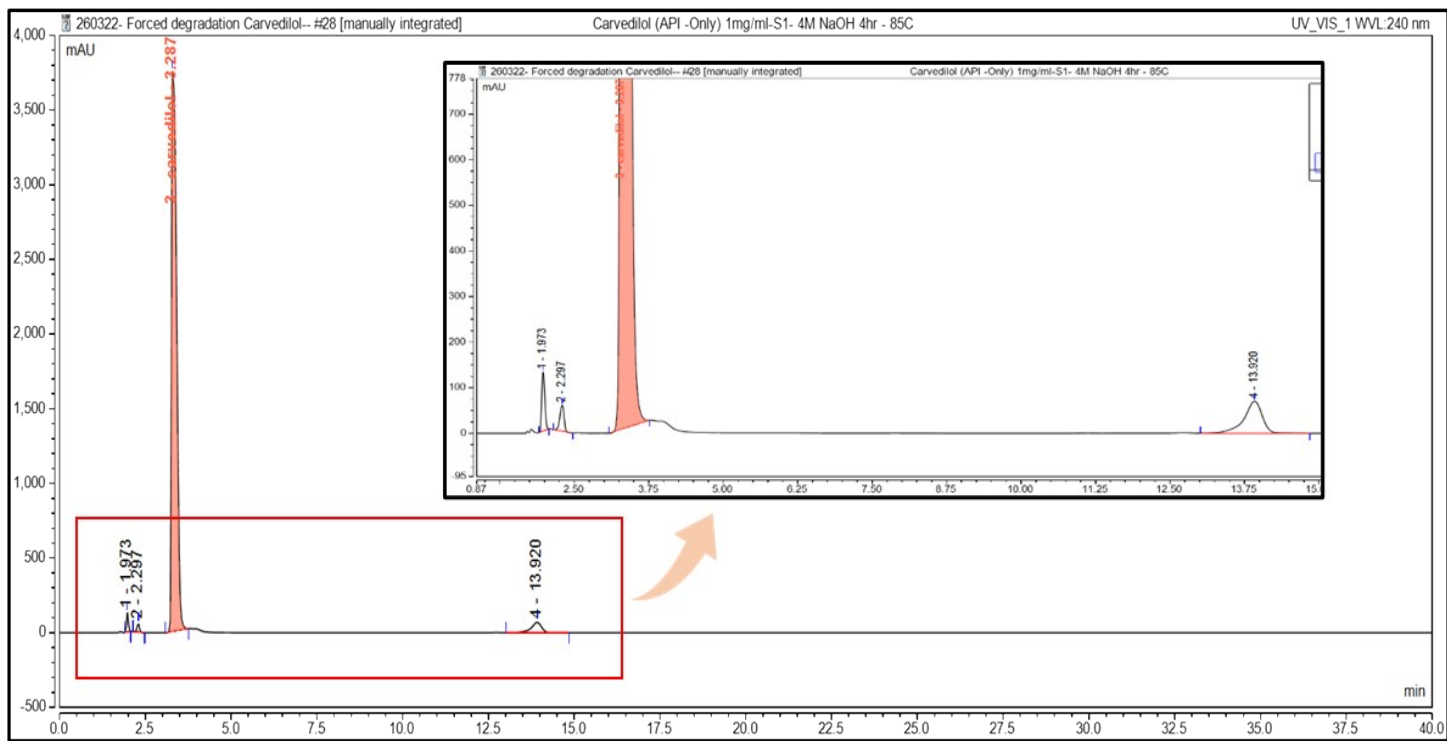

**Figure 61S.** HPLC chromatogram of base hydrolysis of CARV, 4.0 M NaOH for 4 h at 85 °C.

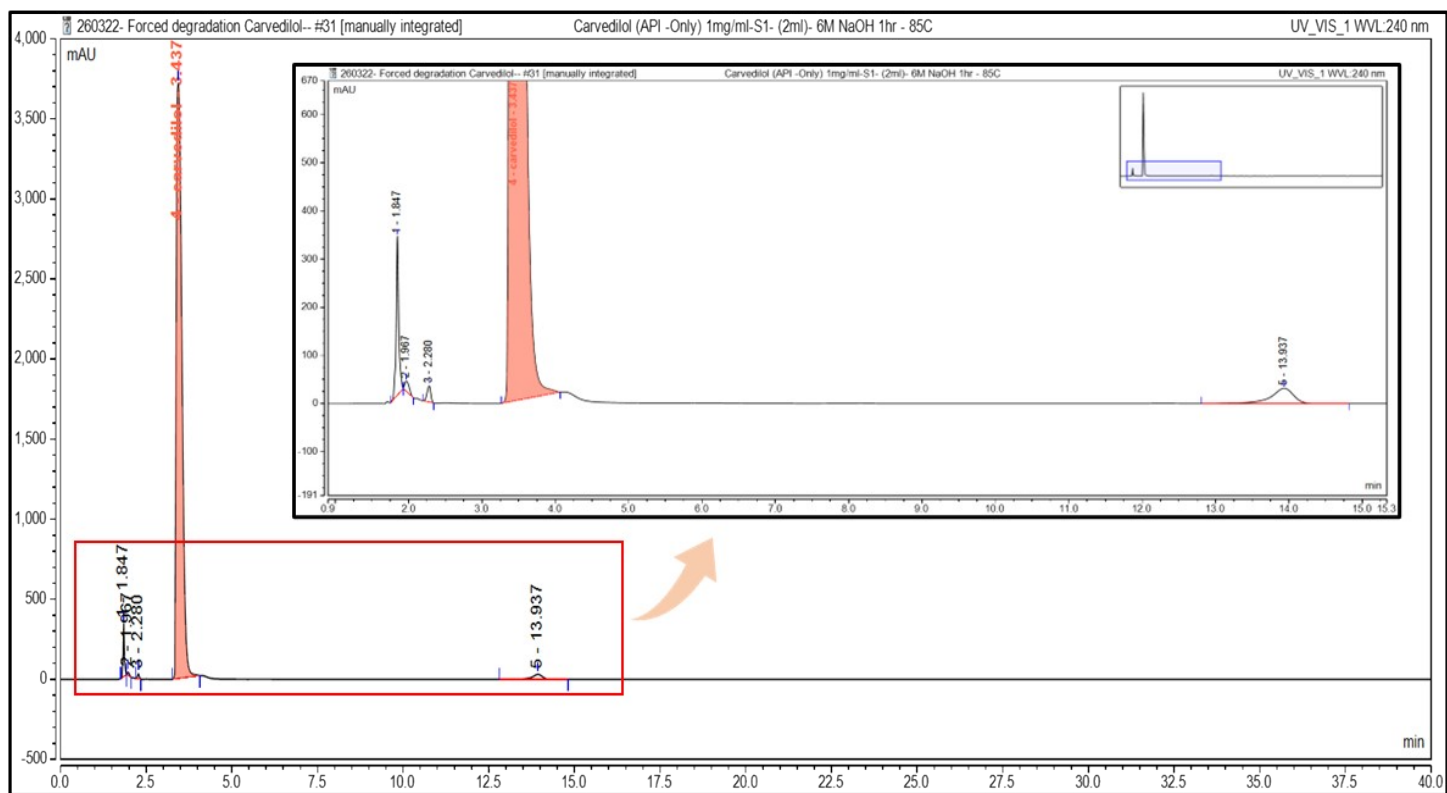

**Figure 62S.** HPLC chromatogram of base hydrolysis of CARV, 6.0 M NaOH (2 ml) for 1 h at 85 °C.

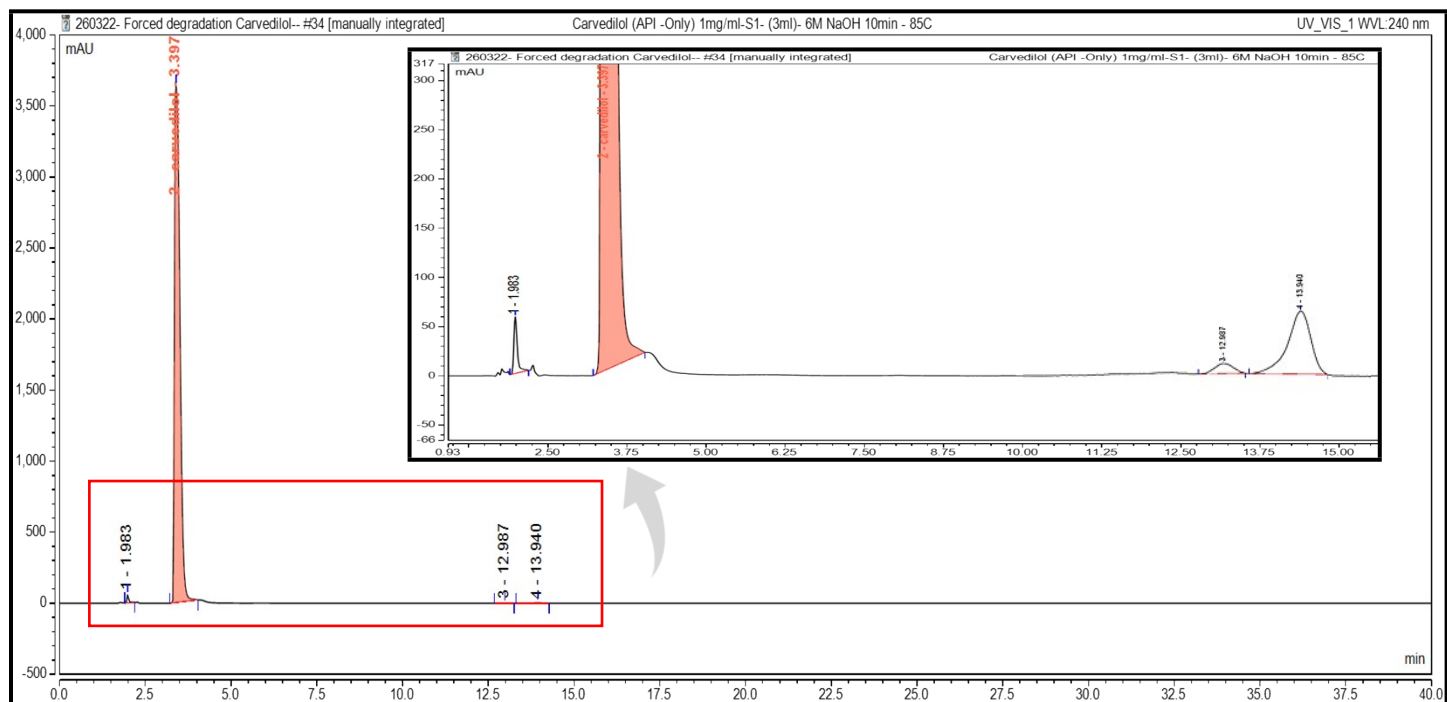

**Figure 63S.** HPLC chromatogram of base hydrolysis of CARV, 6.0 M NaOH (3 ml) for 10 min at 85 °C.



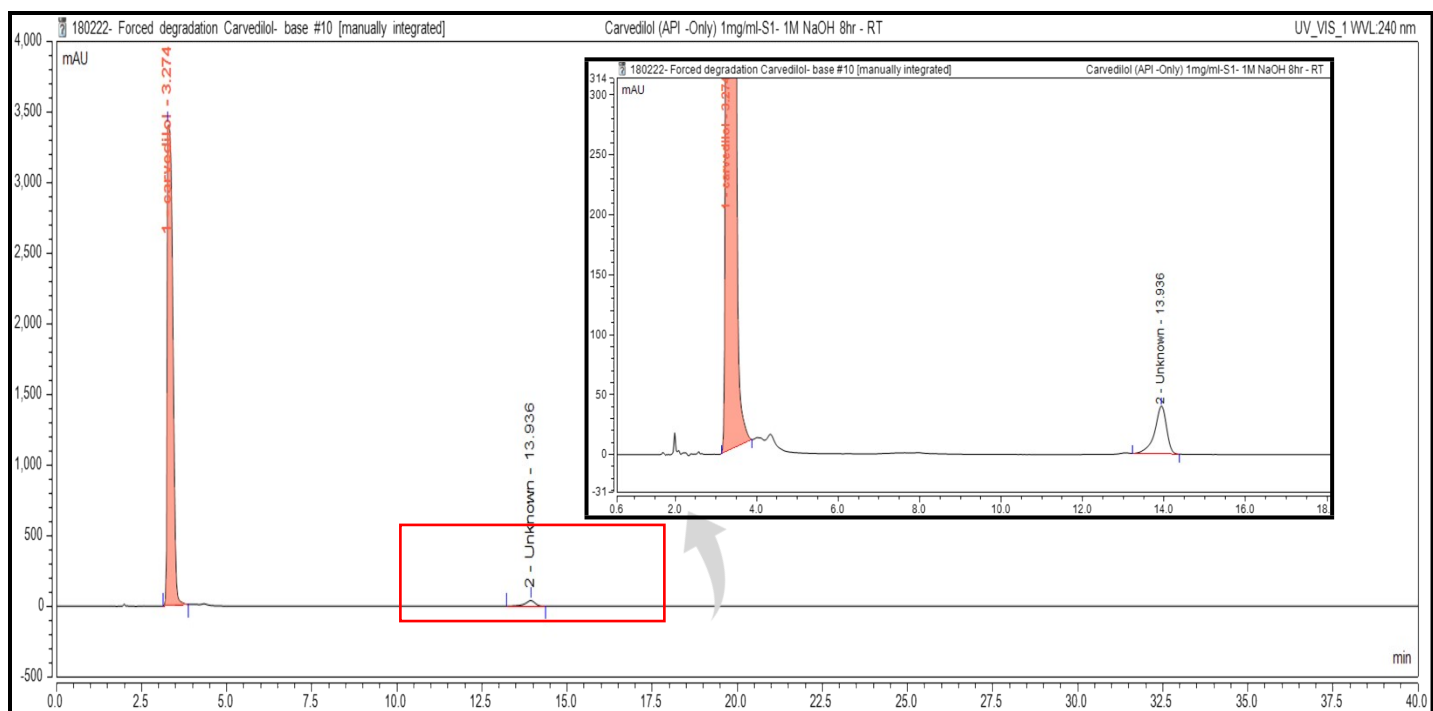

**Figure 64S.** HPLC chromatogram of base hydrolysis of CARV, 1.0 M NaOH for 8 h at RT.

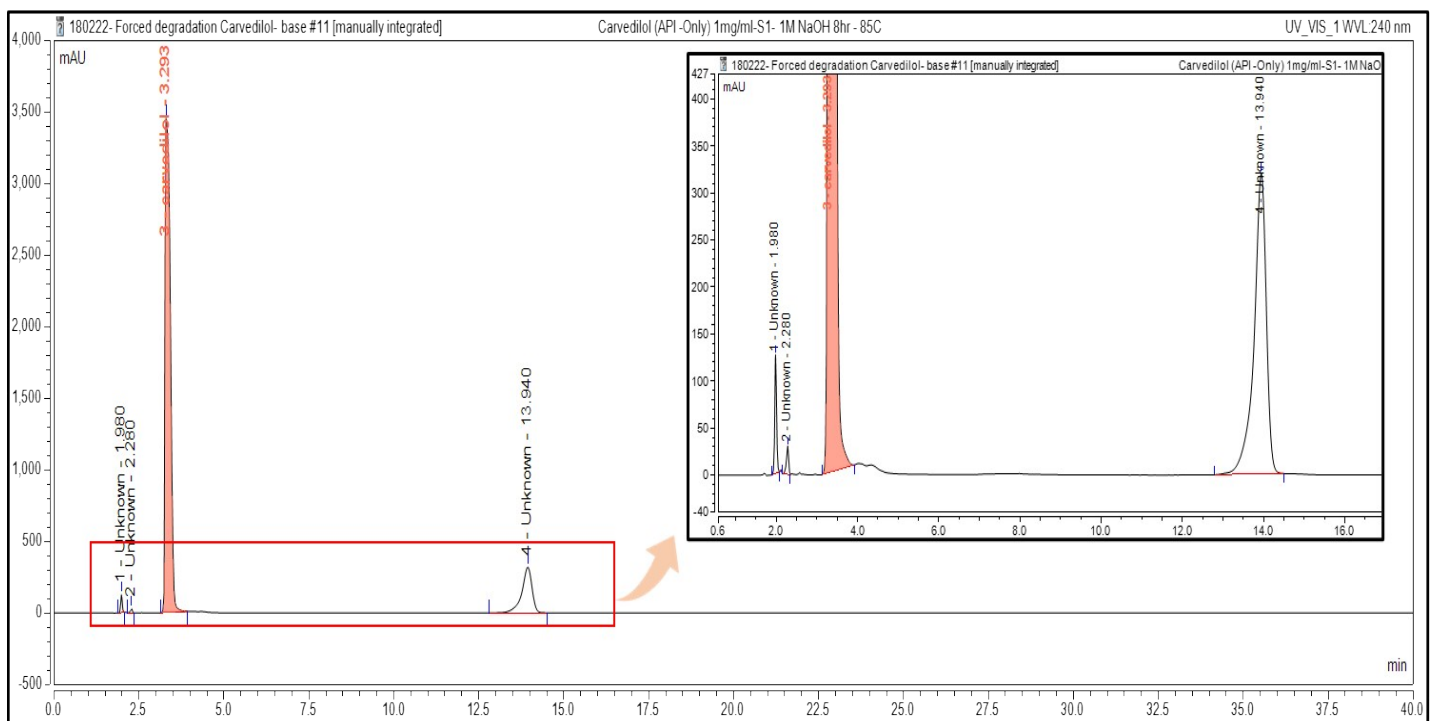

**Figure 65S.** HPLC chromatogram of base hydrolysis of CARV, 1.0 M NaOH for 8 h at 85 °C.

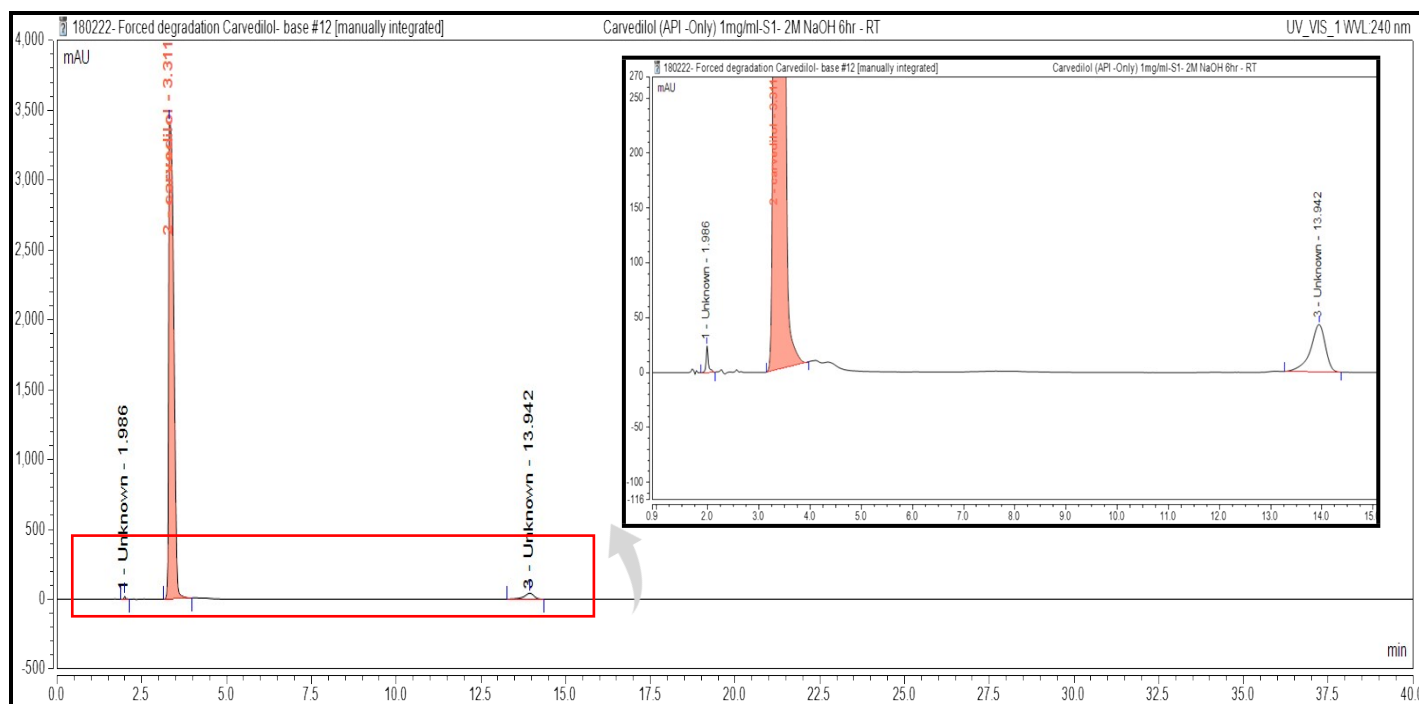

**Figure 66S.** HPLC Chromatogram of base hydrolysis of CARV, 2.0 M NaOH for 6 h at RT.

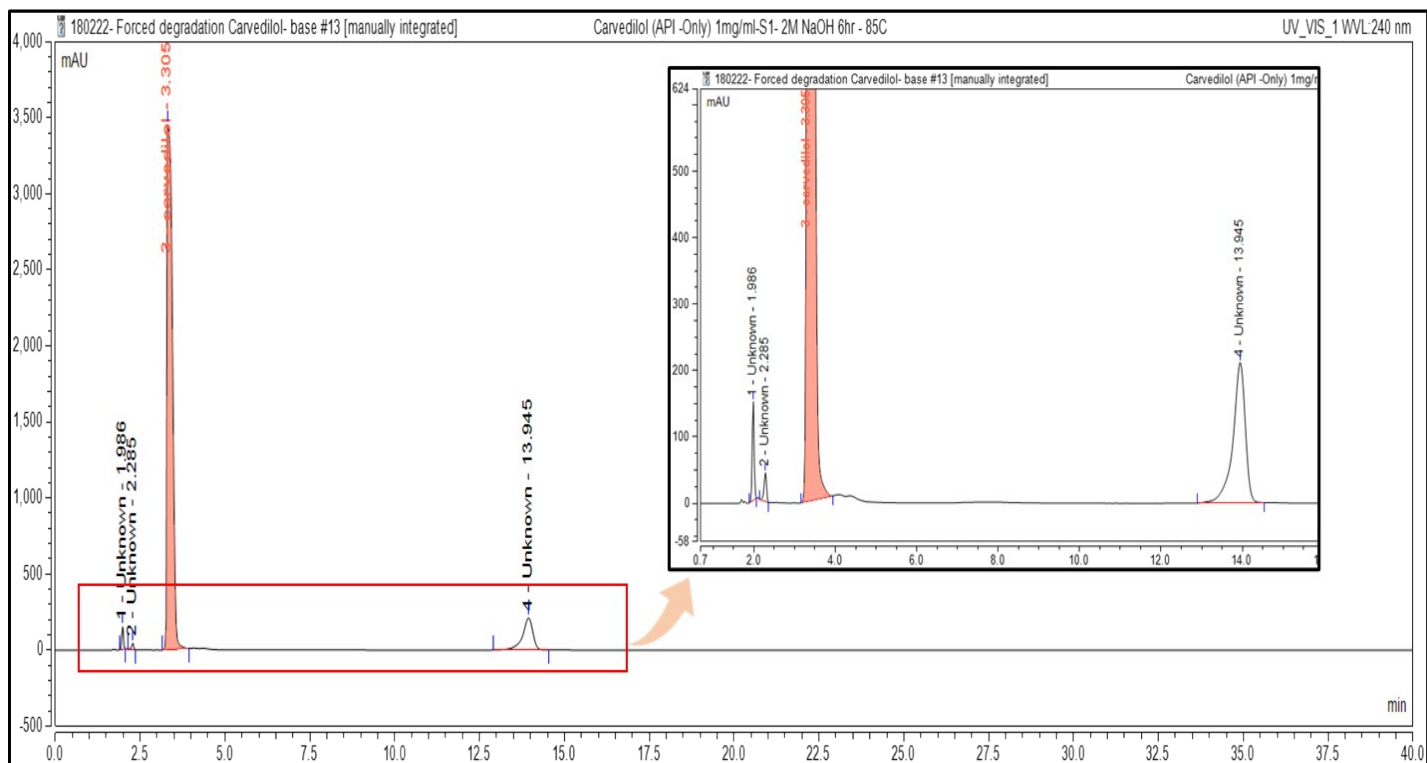

**Figure 67S.** HPLC Chromatogram of base hydrolysis of CARV, 2.0 M NaOH for 6 h at 85 °C.

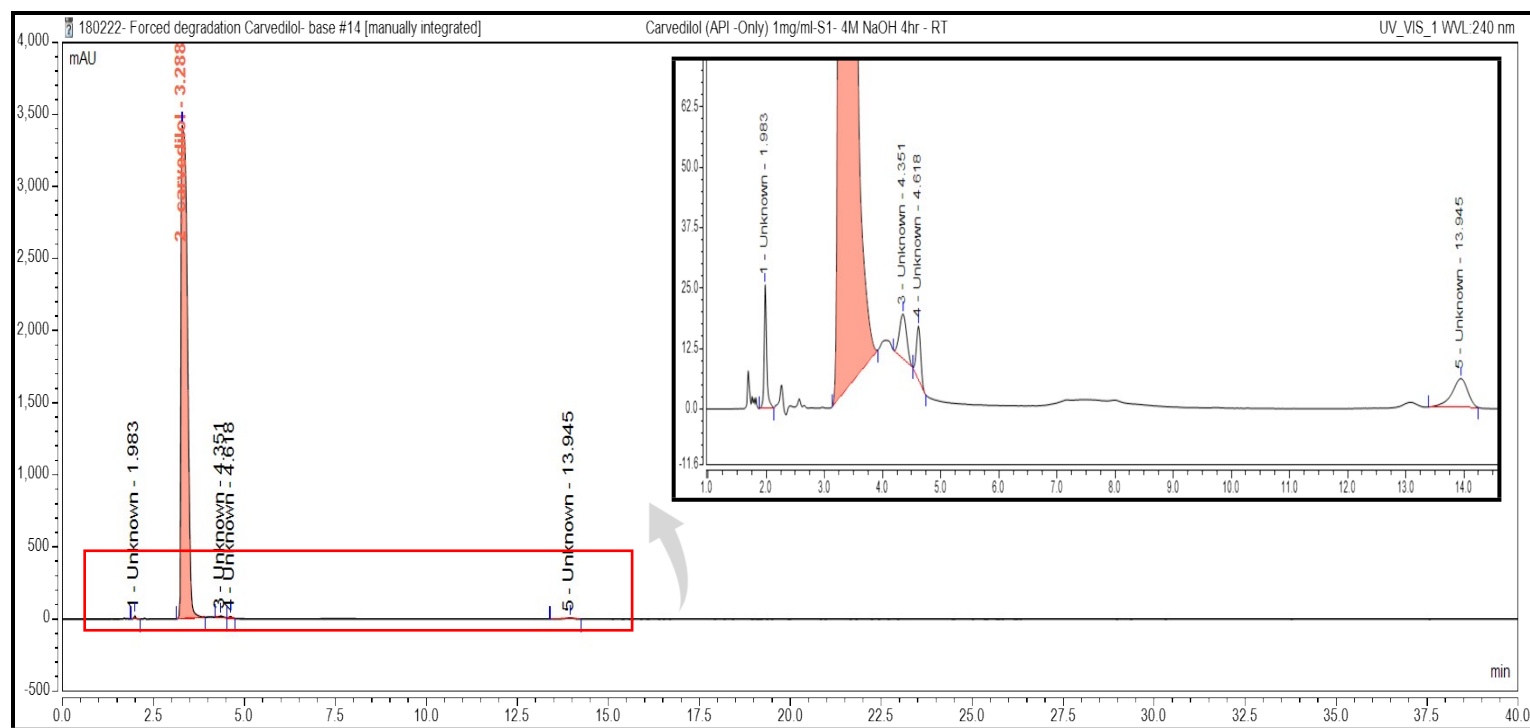

**Figure 68S.** HPLC chromatogram of base hydrolysis of CARV, 4.0 M NaOH for 4 h at RT.

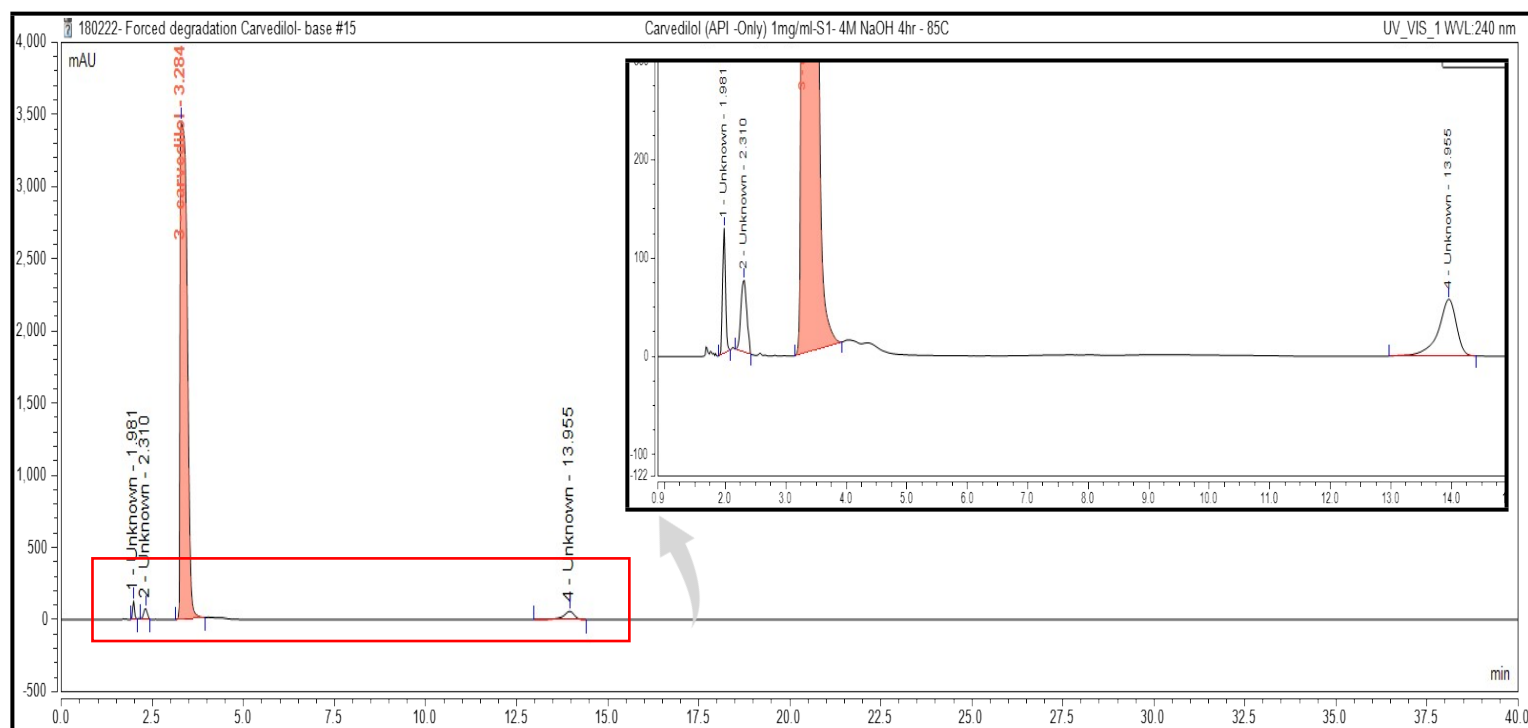

**Figure 69S.** HPLC chromatogram of base hydrolysis of CARV, 4.0 M NaOH for 4 h at 85 °C.

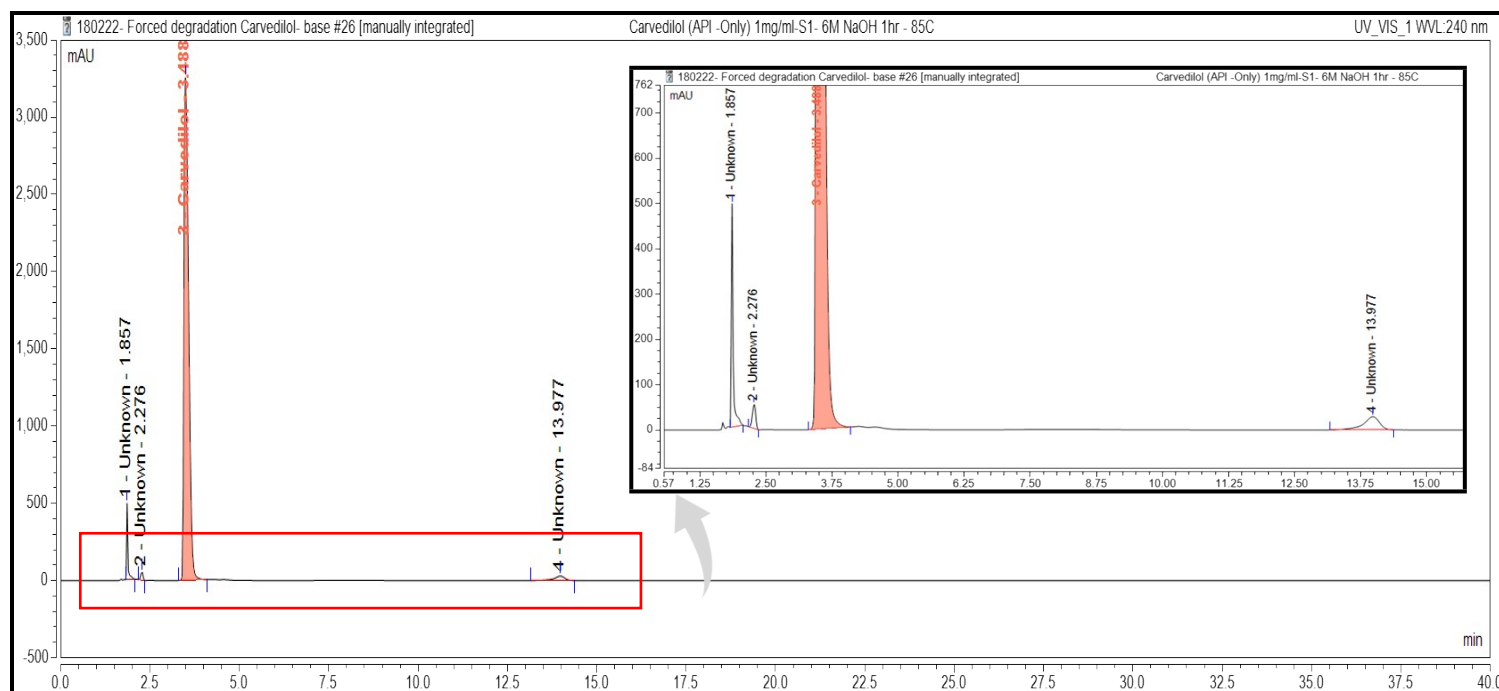

**Figure 70S.** HPLC chromatogram of base hydrolysis of CARV, 6.0 M NaOH for 1 h at 85 °C.

### CARV-MEOG - Base Degradation:

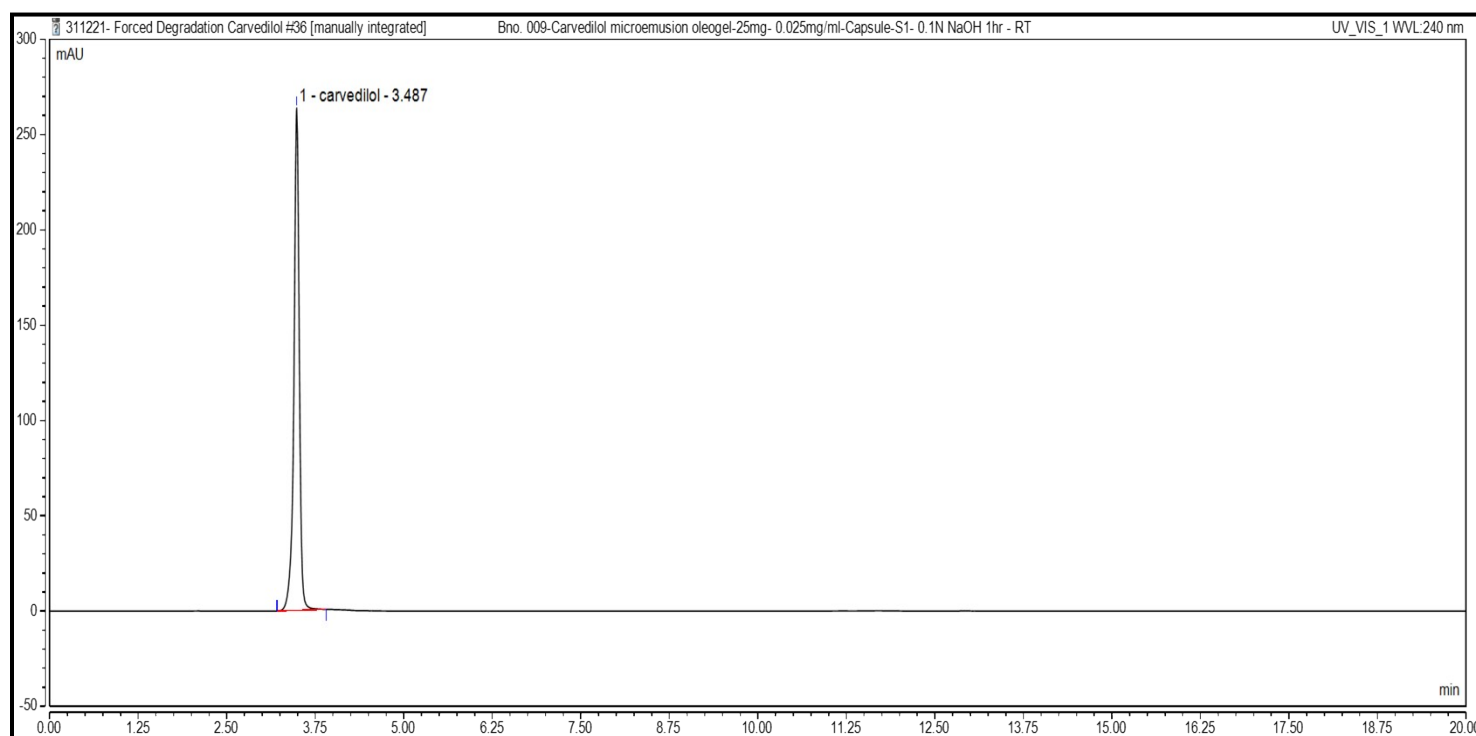

**Figure 71S.** HPLC chromatogram of base hydrolysis of CARV-MEOG, 0.1 M NaOH for 1 h at RT.

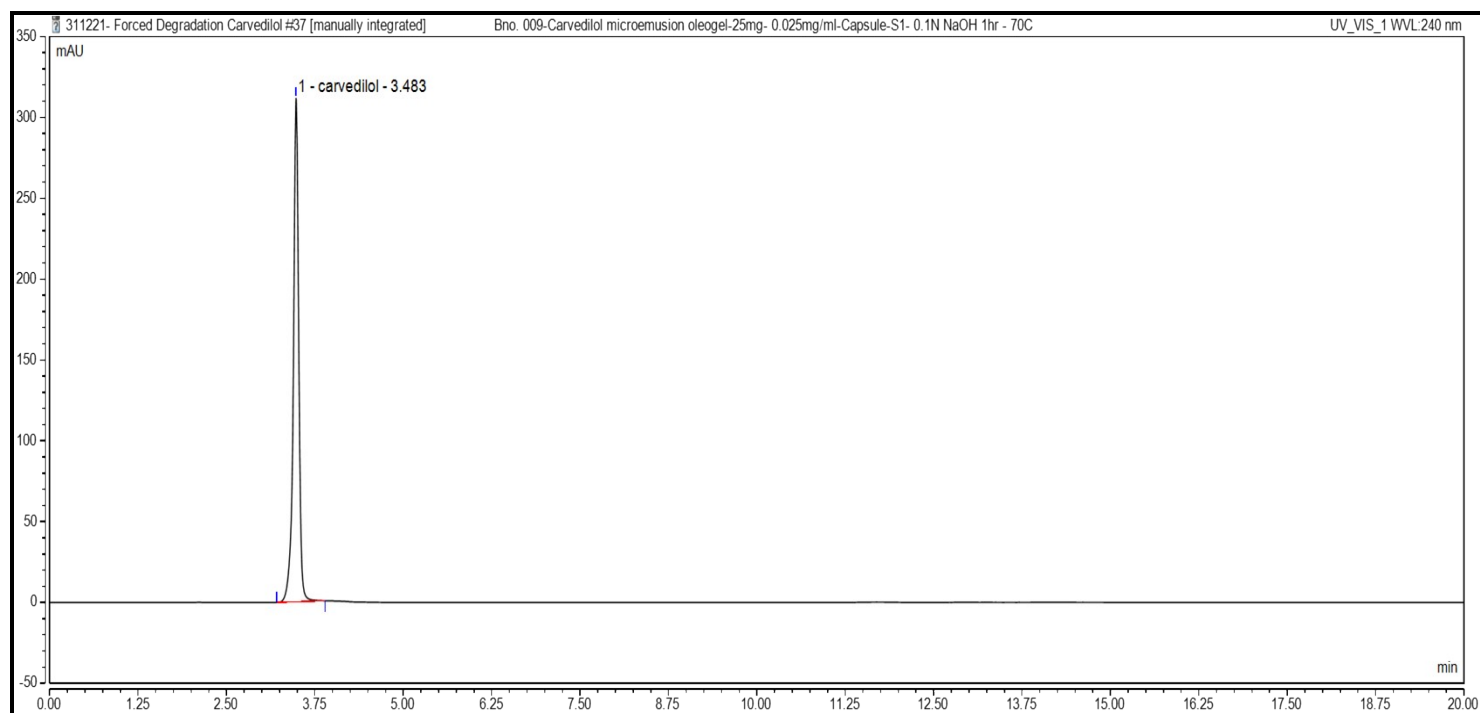

**Figure 72S.** HPLC chromatogram of base hydrolysis of CARV-MEOG, 0.1 M NaOH for 1 h at 70 °C.

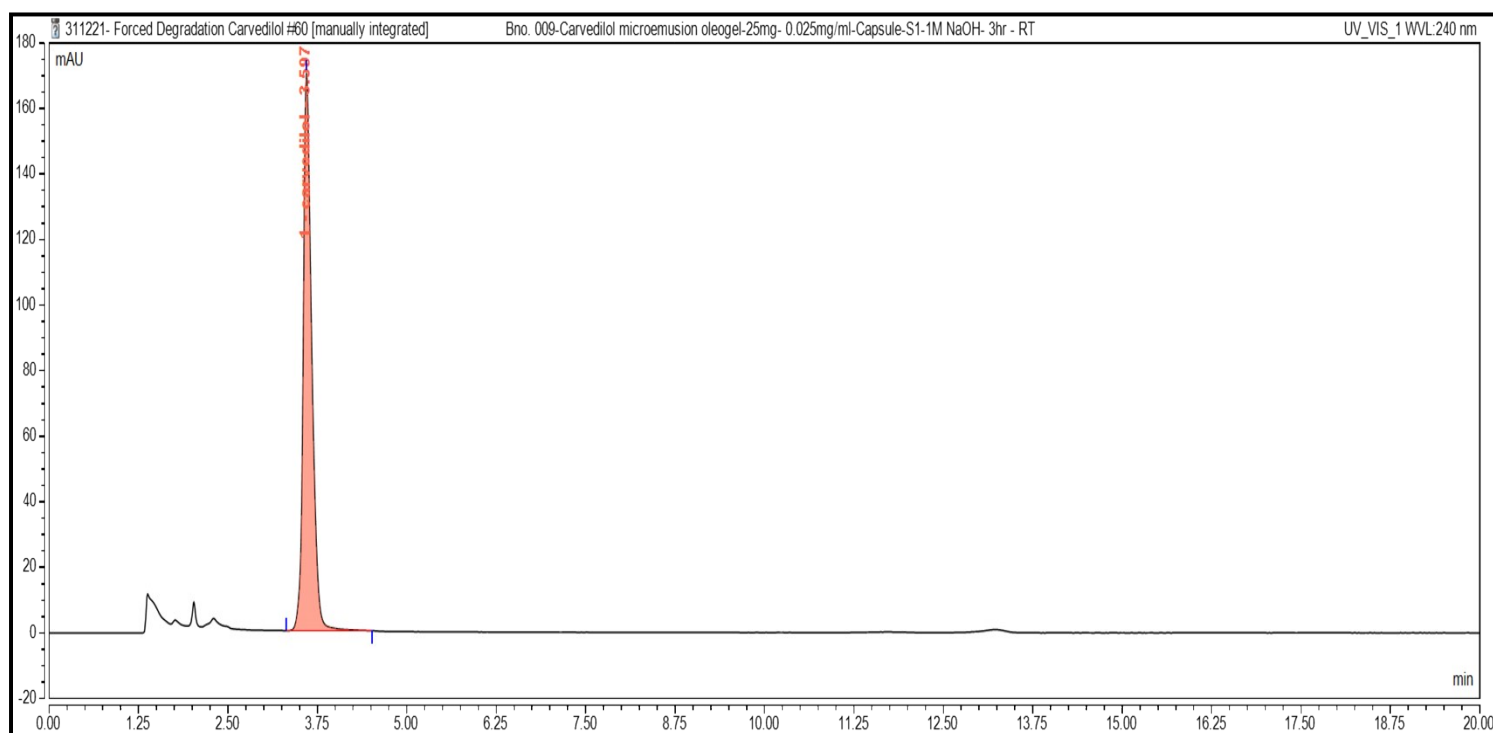

**Figure 73S.** HPLC chromatogram of base hydrolysis of CARV-MEOG, 1.0 M NaOH for 3 h at RT.  
(Note: peak at retention time 2.023 min is related for the excipient degradation)

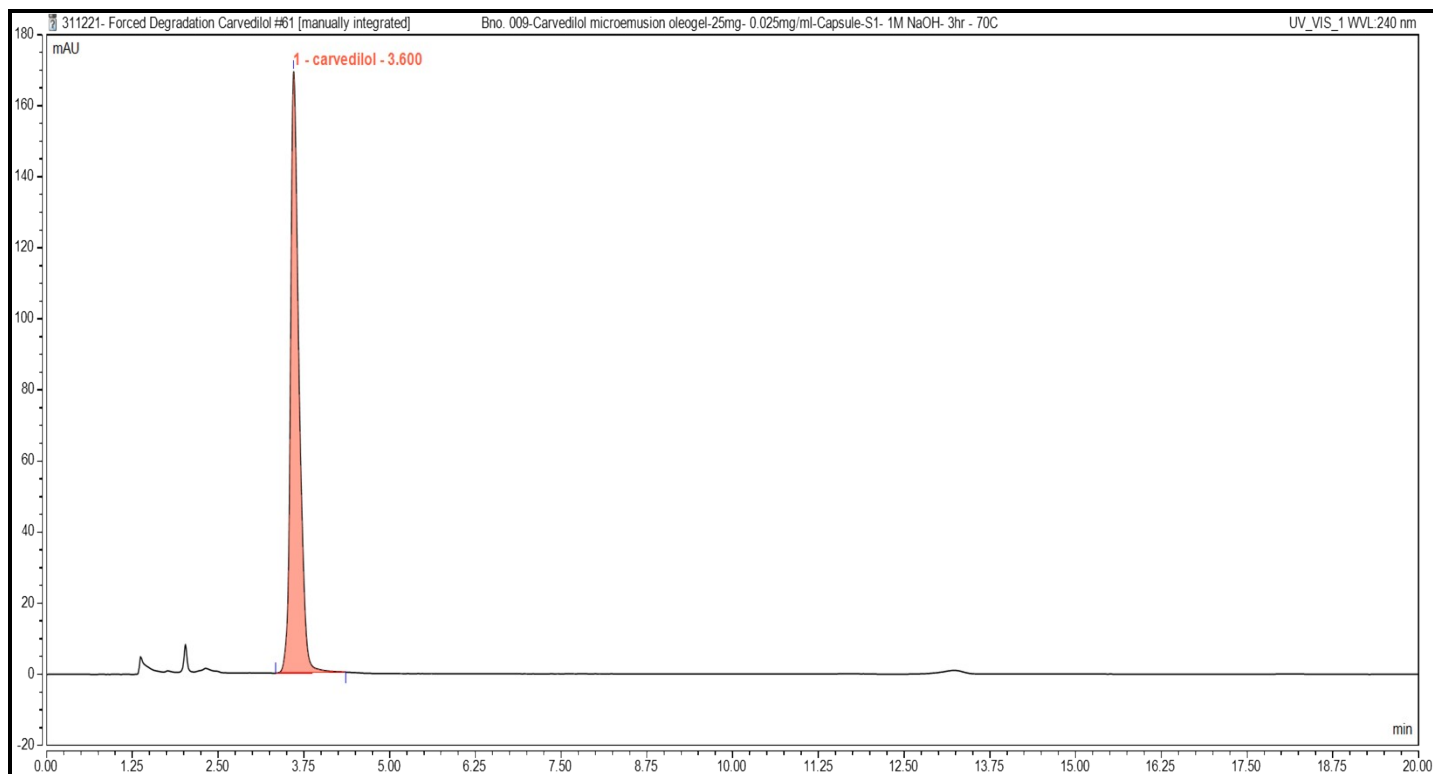

**Figure 74S.** HPLC chromatogram of base hydrolysis of CARV-MEOG, 1.0 M NaOH for 3 h at 70 °C.

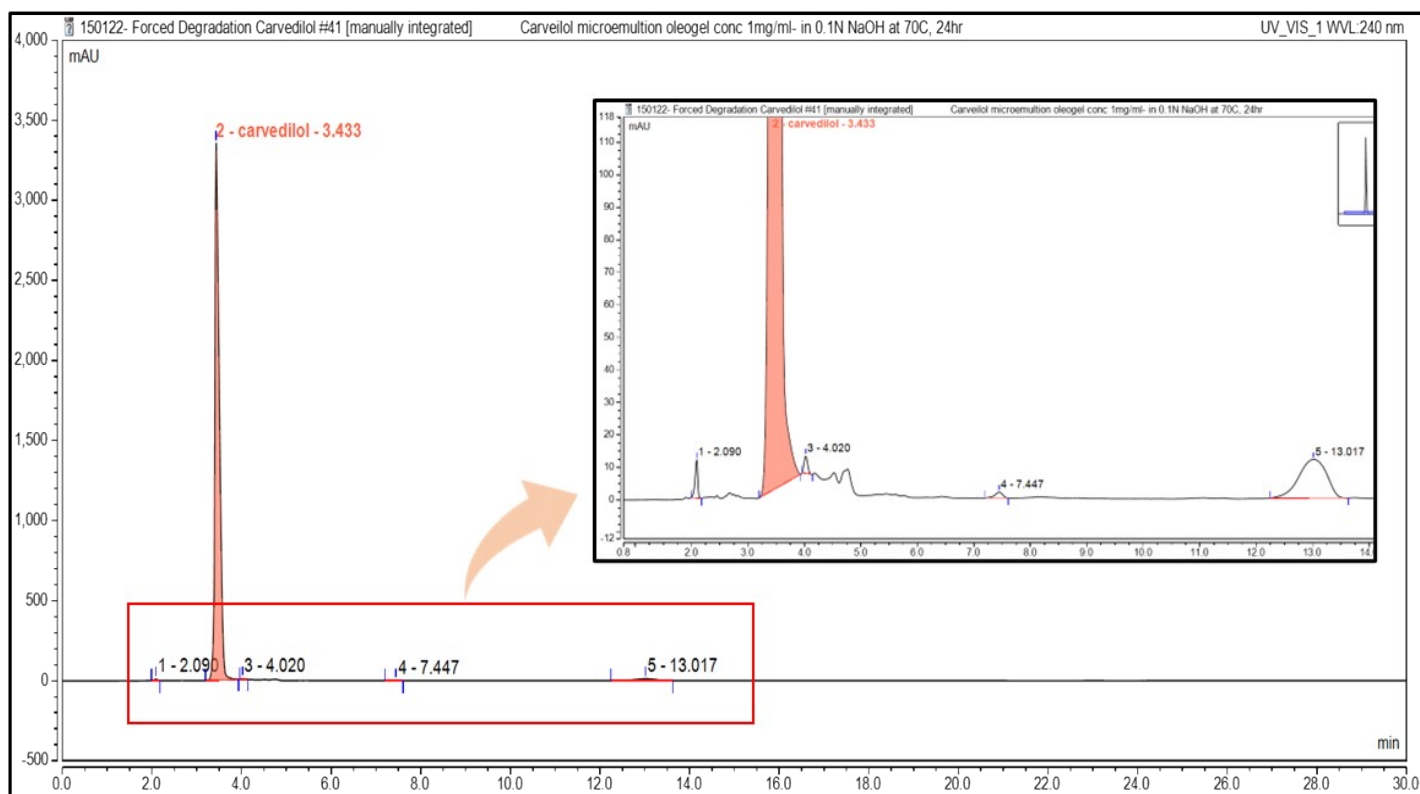

**Figure 75S.** HPLC chromatogram of base hydrolysis of CARV-MEOG, 0.1 M NaOH for 24 h at 70 °C.

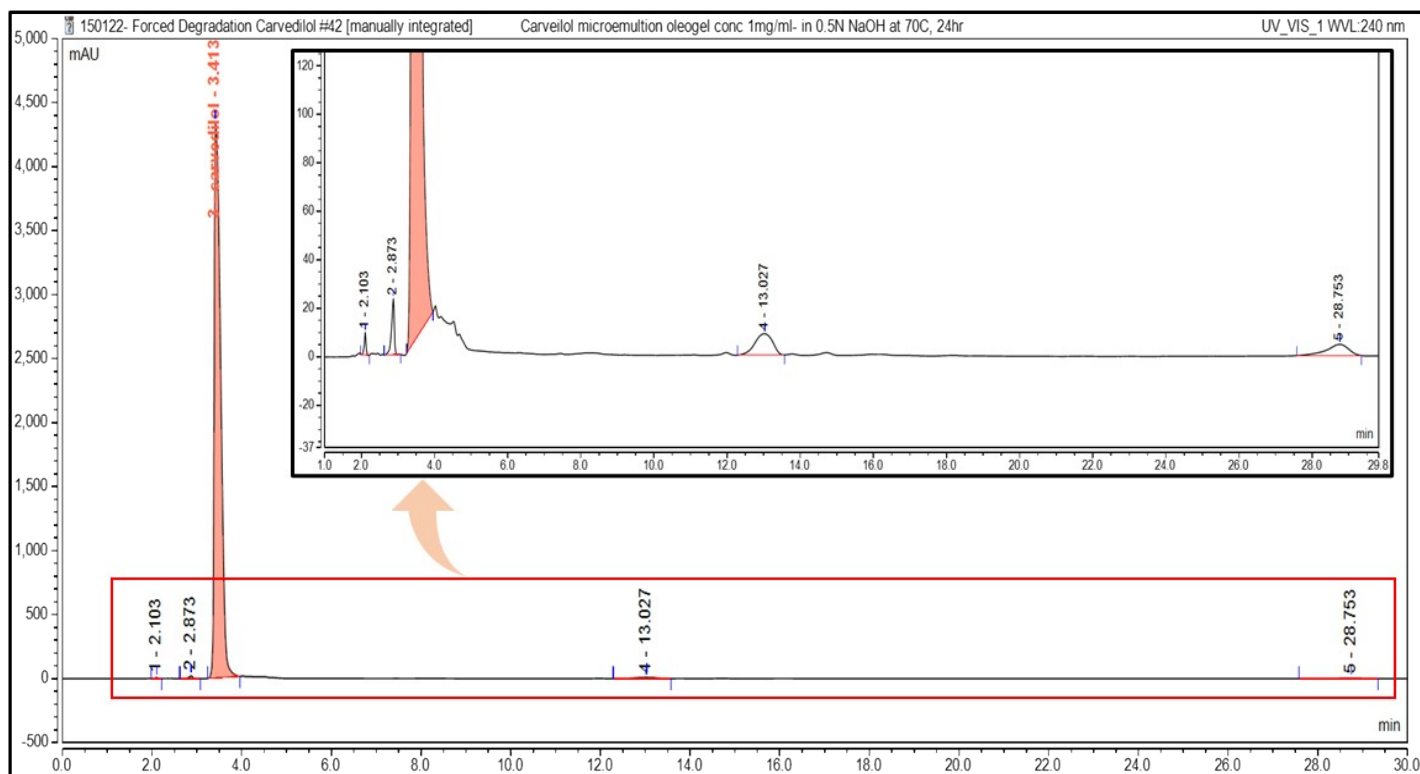

**Figure 76S.** HPLC chromatogram of base hydrolysis of CARV-MEOG, 0.5 M NaOH for 24 h at 70 °C.

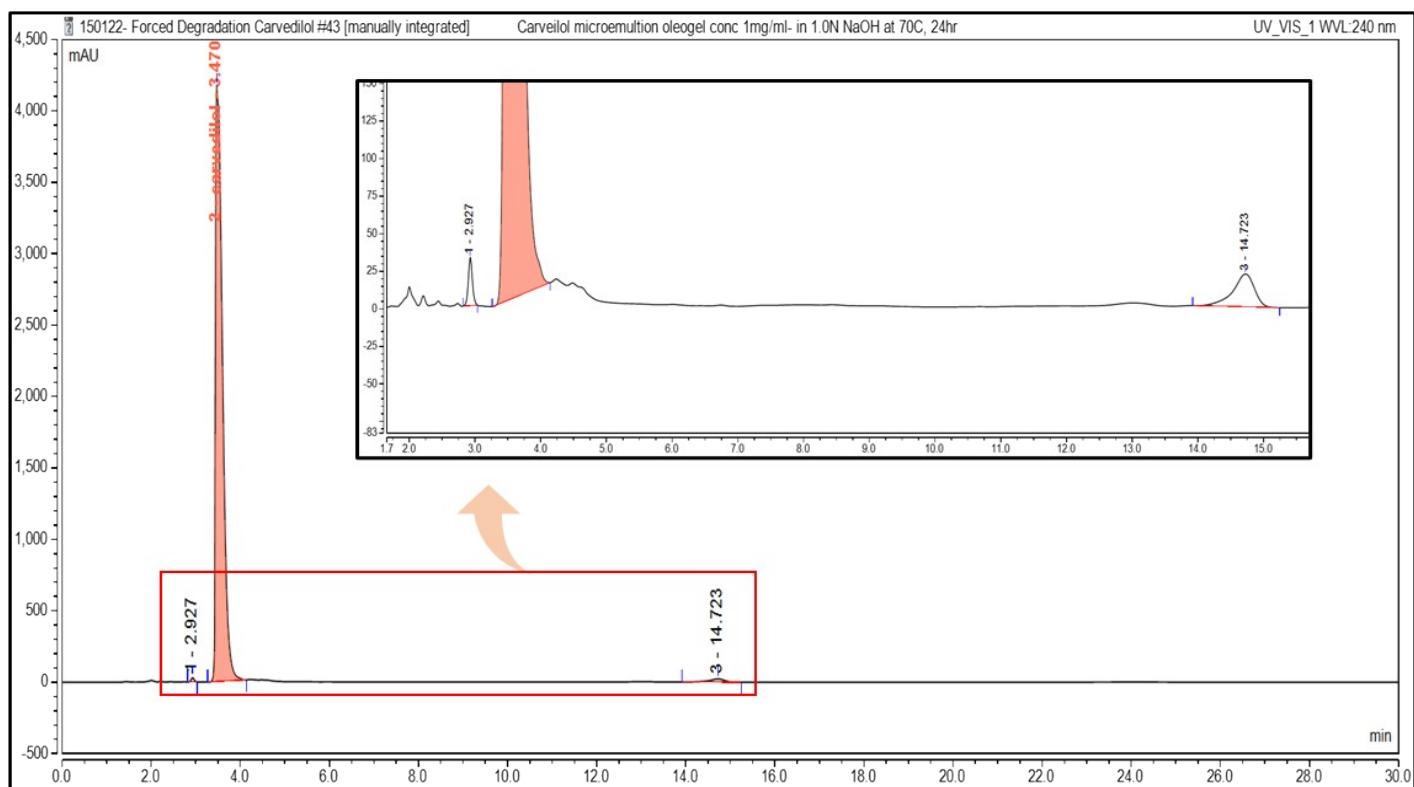

**Figure 77S.** HPLC chromatogram of base hydrolysis of CARV-MEOG, 1.0 M NaOH for 24 h at 70 °C.

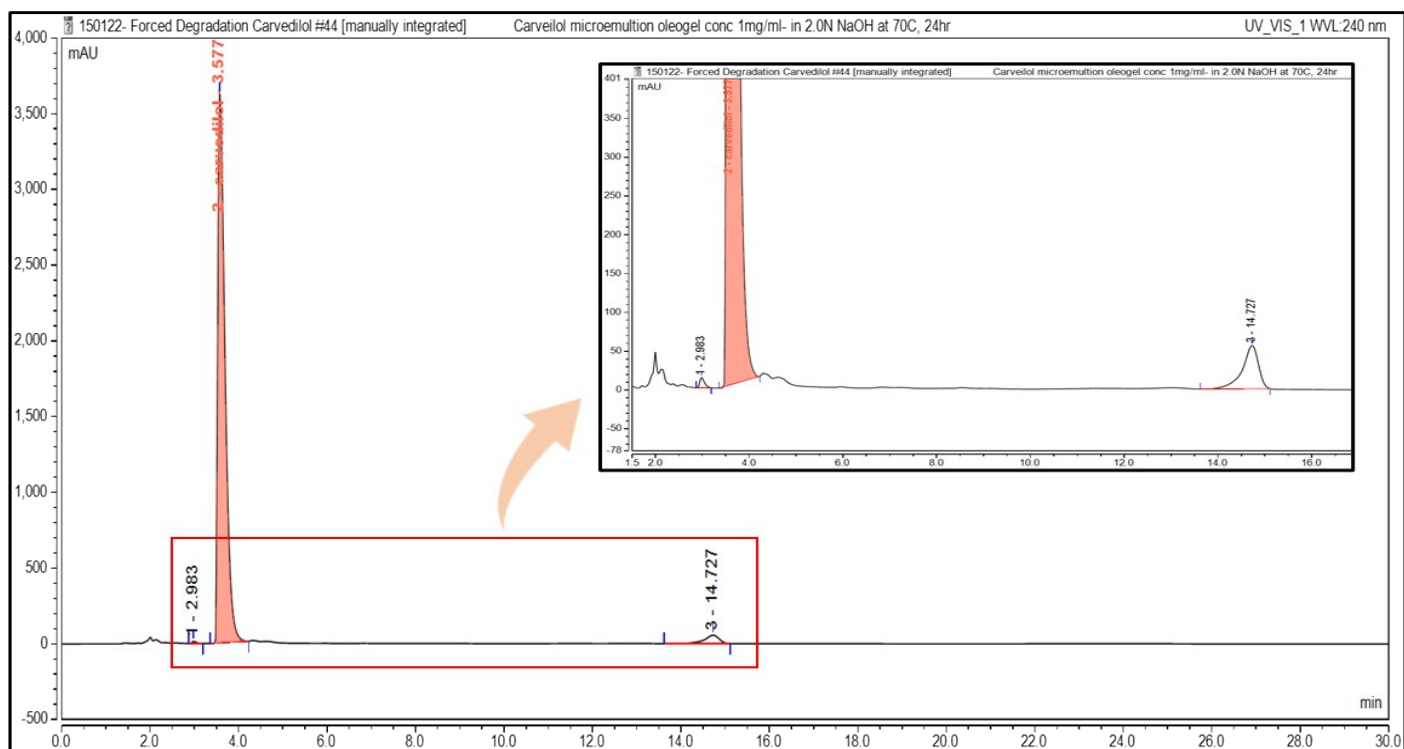

**Figure 78S.** HPLC chromatogram of base hydrolysis of CARV-MEOG, 2.0 M NaOH for 24 h at 70 °C.

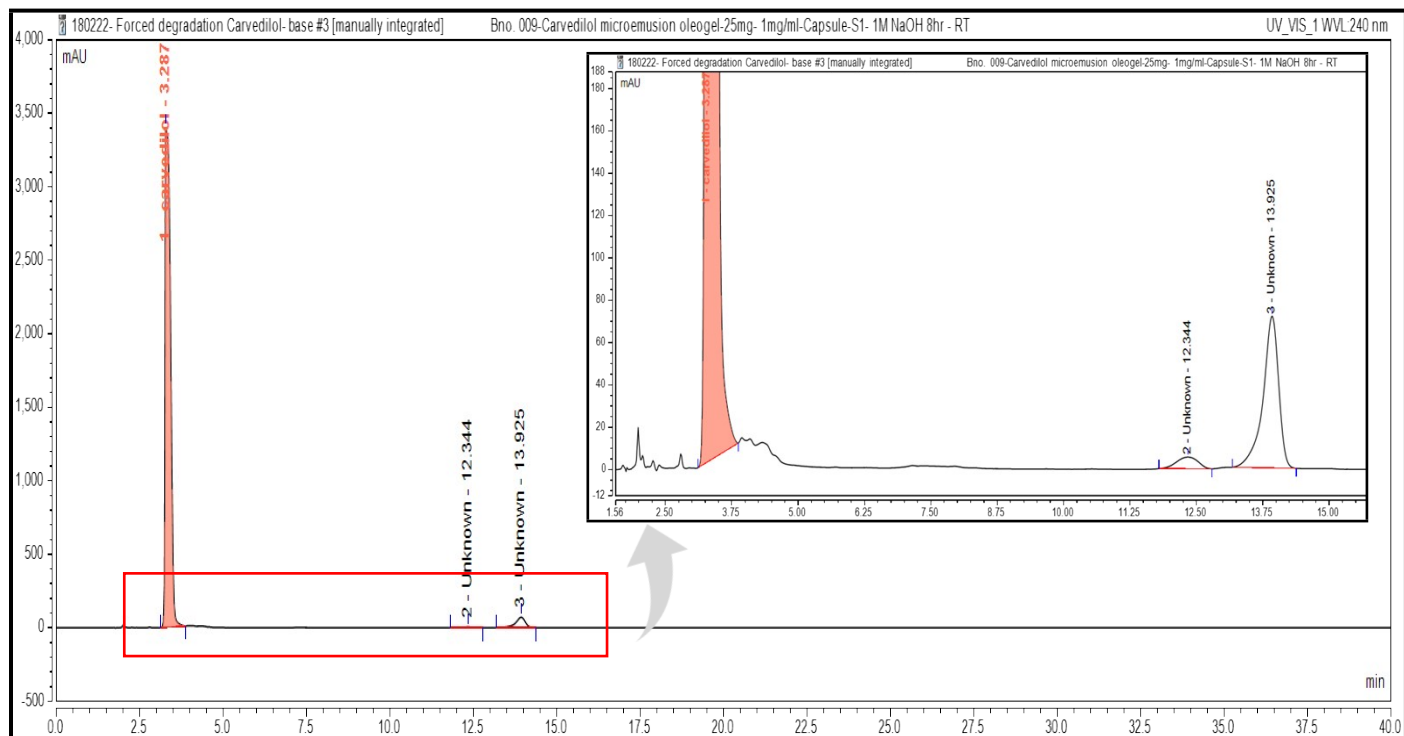

**Figure 79S.** HPLC chromatogram of base hydrolysis of CARV-MEOG, 1.0 M NaOH for 8 h at RT.



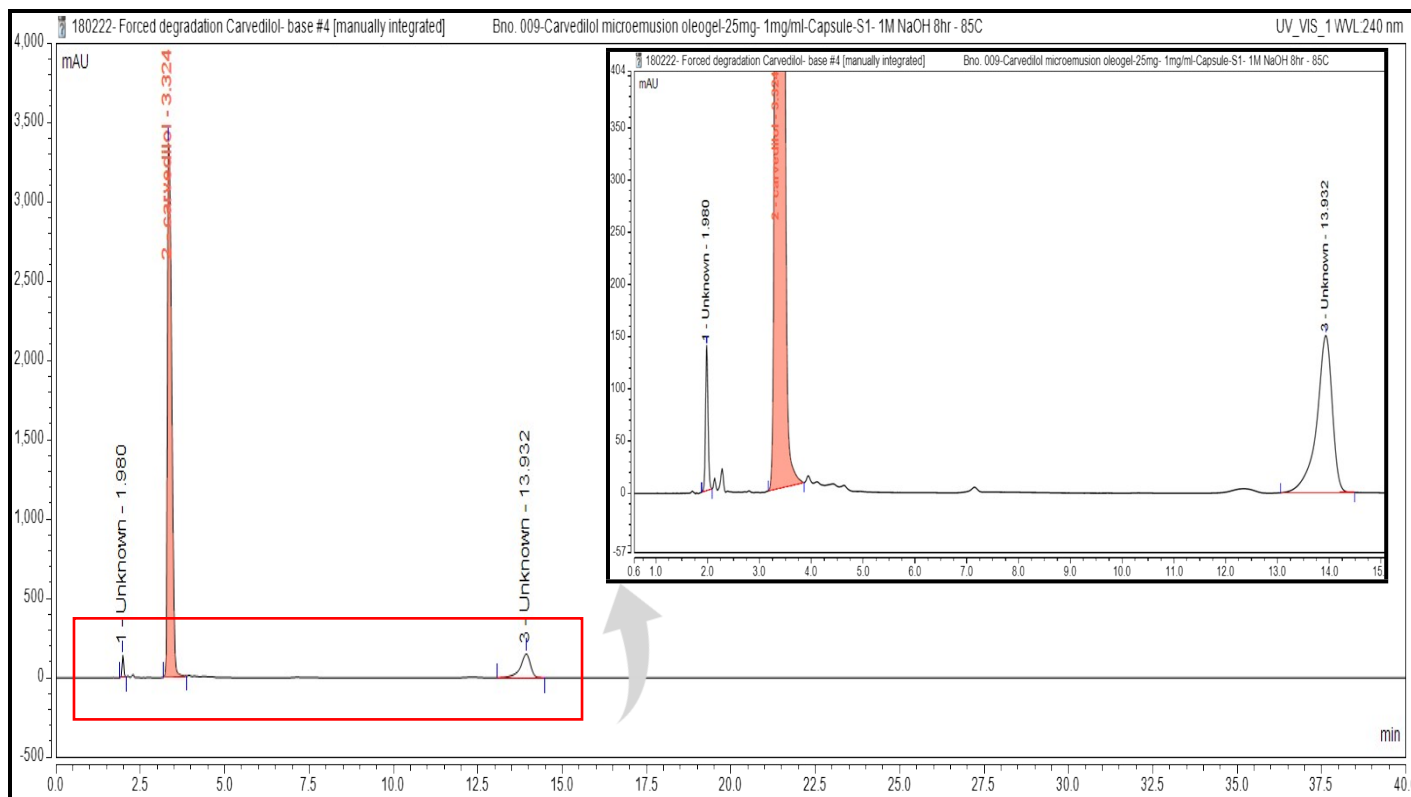

**Figure 80S.** HPLC chromatogram of base hydrolysis of CARV-MEOG, 1.0 M NaOH for 8 h at 85 °C.

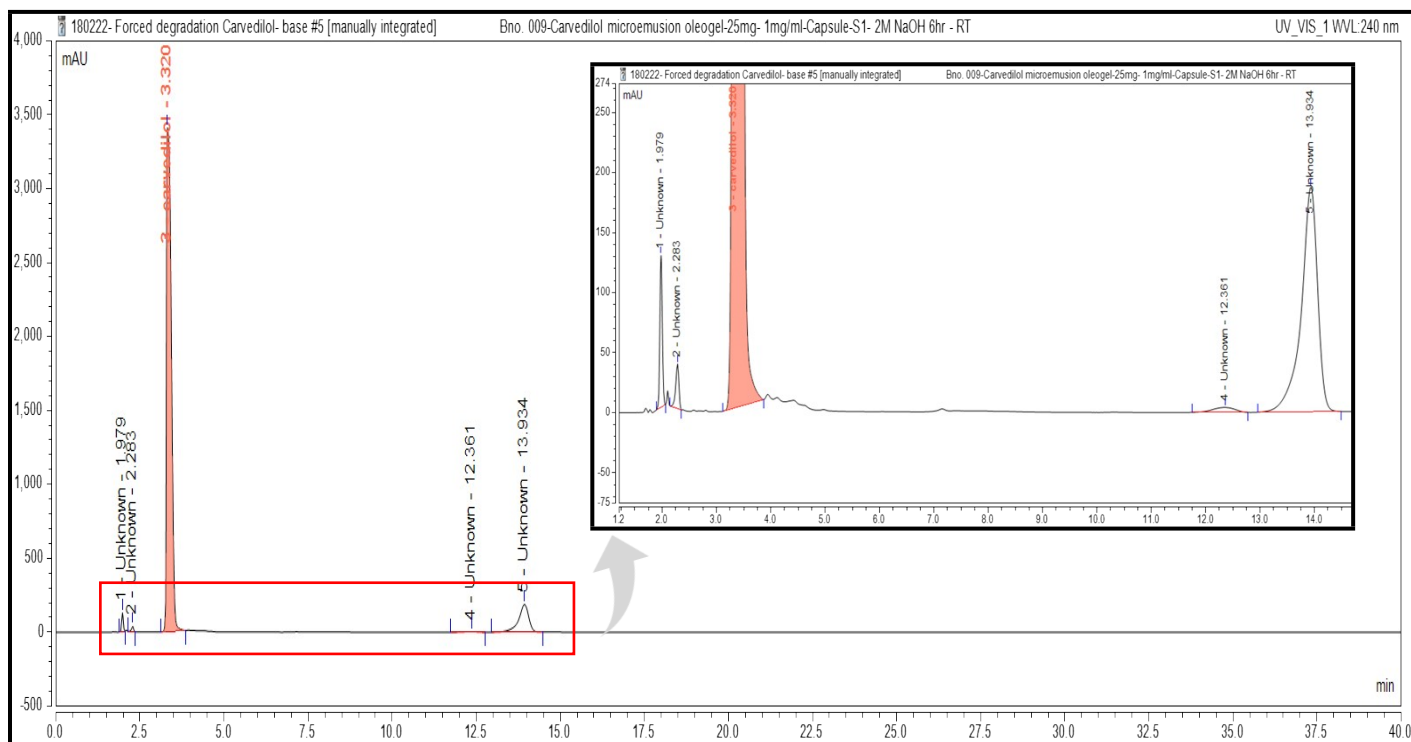

**Figure 81S.** HPLC chromatogram of base hydrolysis of CARV-MEOG, 2.0 M NaOH for 6 h at RT.

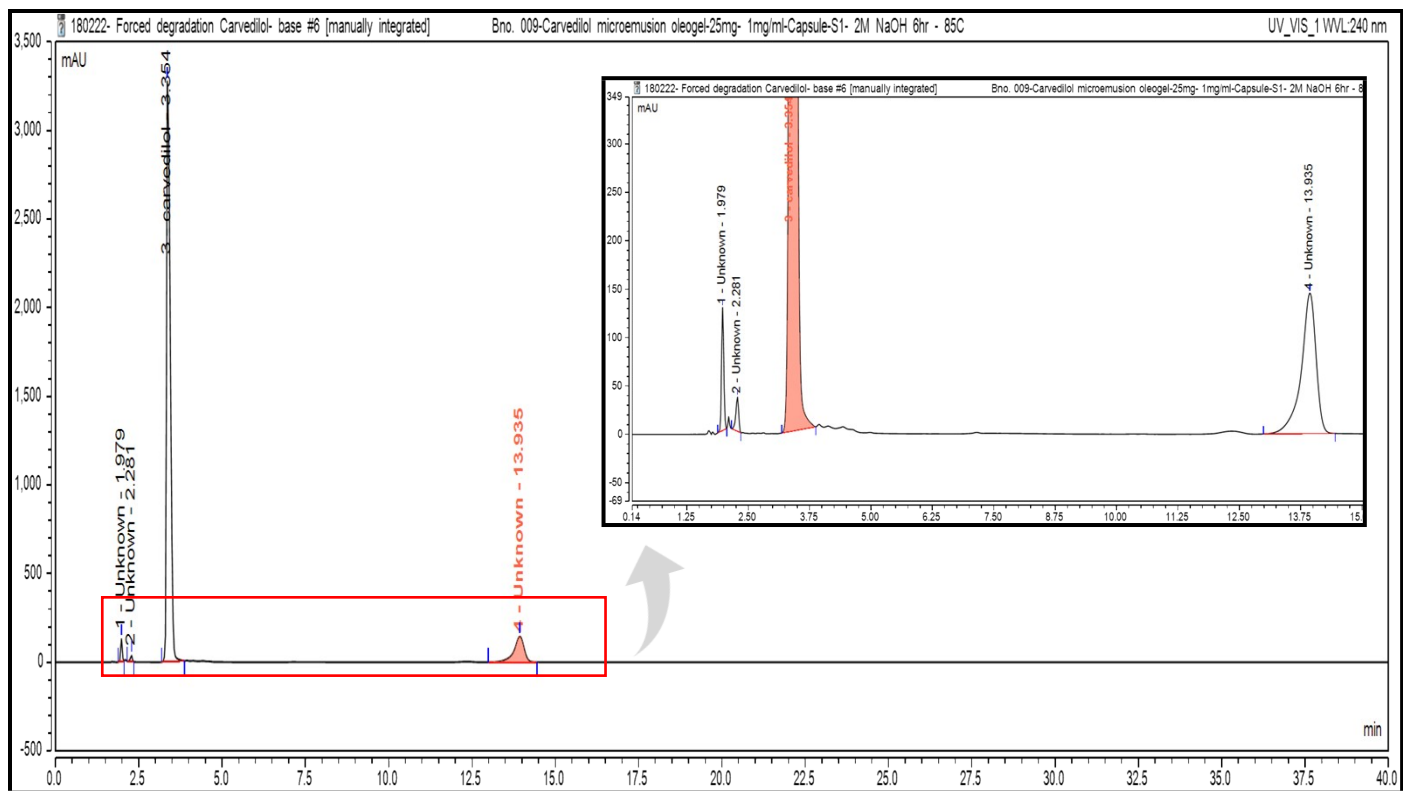

**Figure 82S.** HPLC chromatogram of base hydrolysis of CARV-MEOG, 2.0 M NaOH for 6 h at 85 °C.

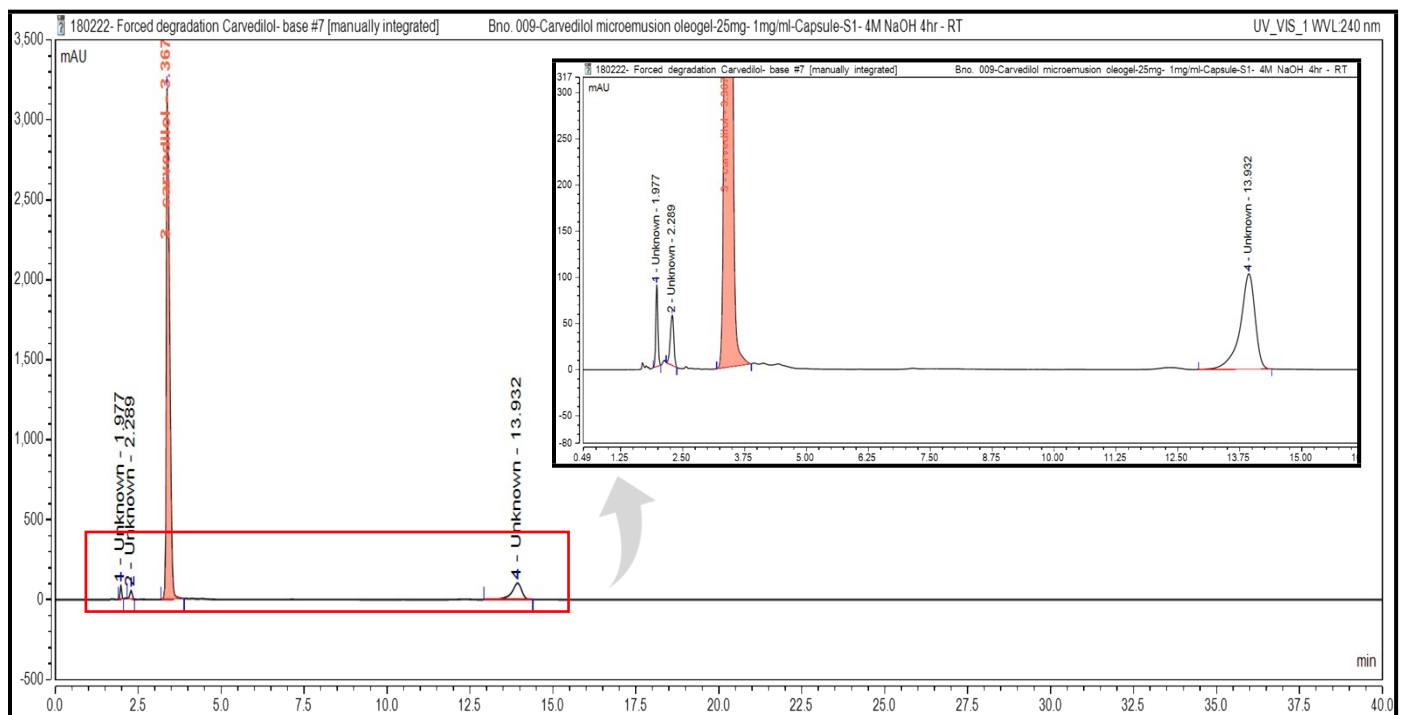

**Figure 83S.** HPLC chromatogram of base hydrolysis of CARV-MEOG, 4.0 M NaOH for 4 h at RT.

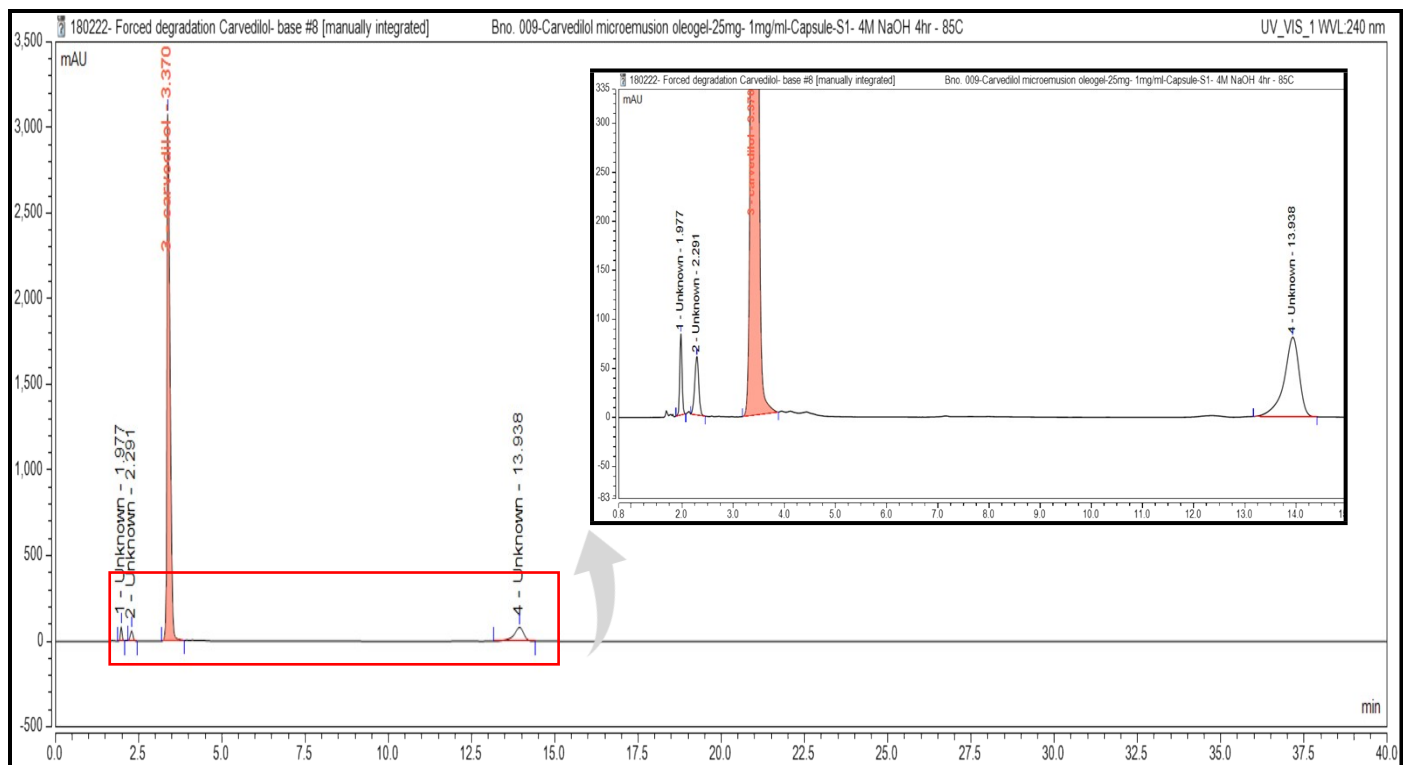

**Figure 84S.** HPLC chromatogram of base hydrolysis of CARV-MEOG, 4.0 M NaOH for 4 h at 85 °C.

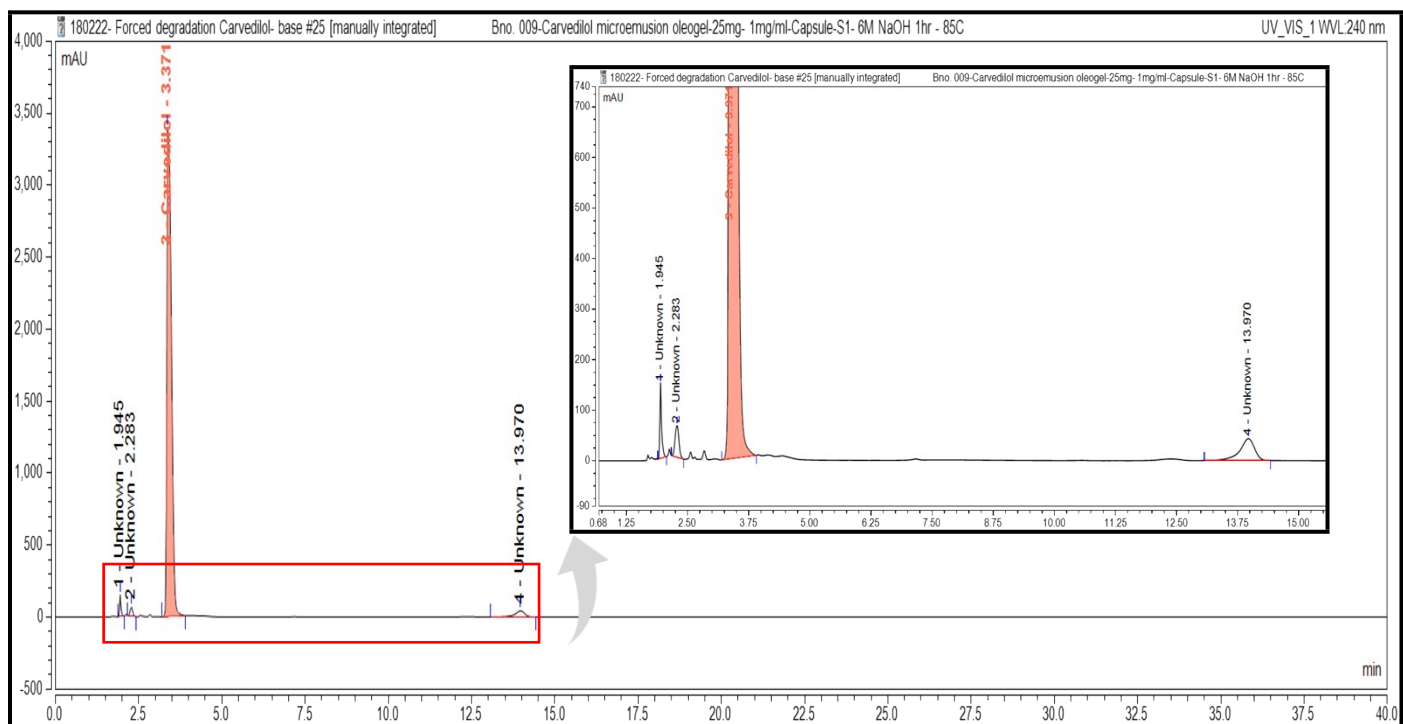

**Figure 85S.** HPLC chromatogram of base hydrolysis of CARV-MEOG, 6.0 M NaOH for 1 h at 85 °C.

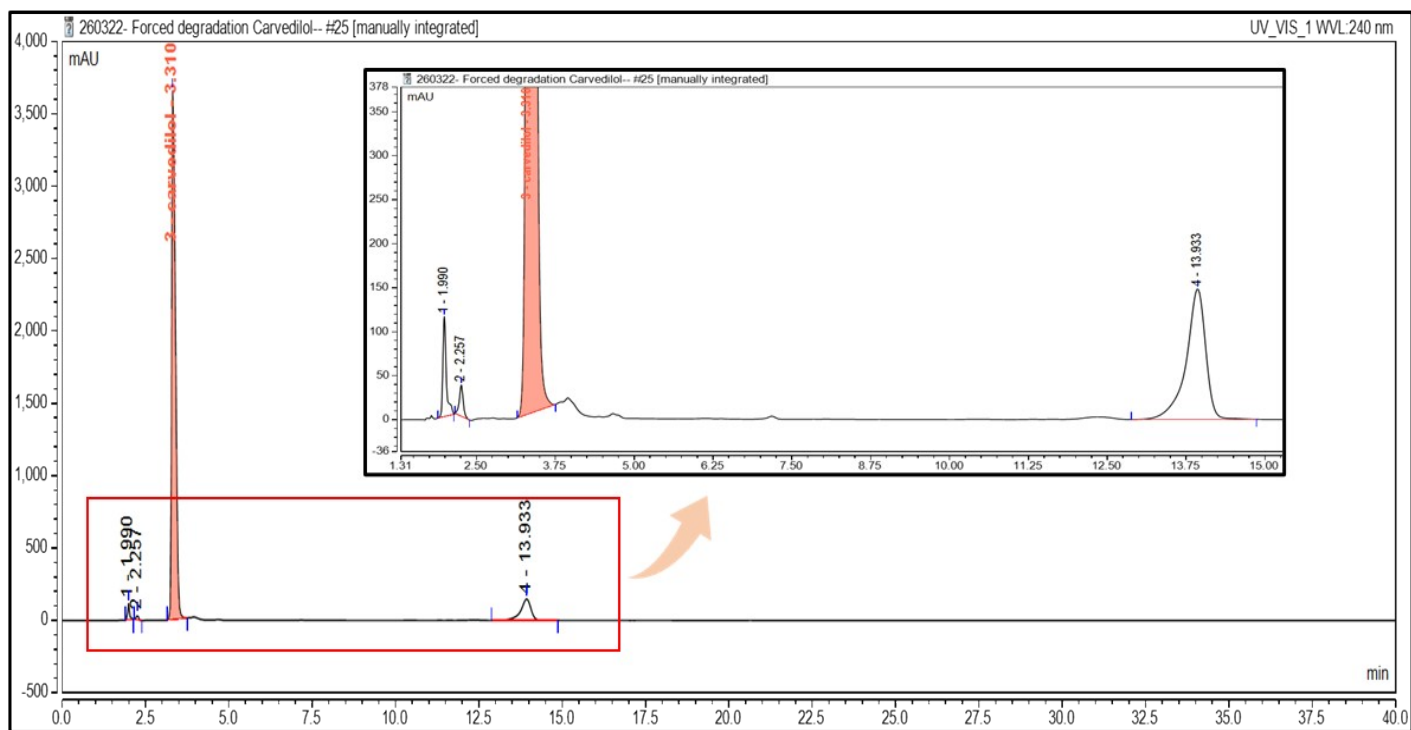

**Figure 86S.** HPLC chromatogram of base hydrolysis of CARV-MEOG, 2.0 M NaOH for 6 h at 85 °C.

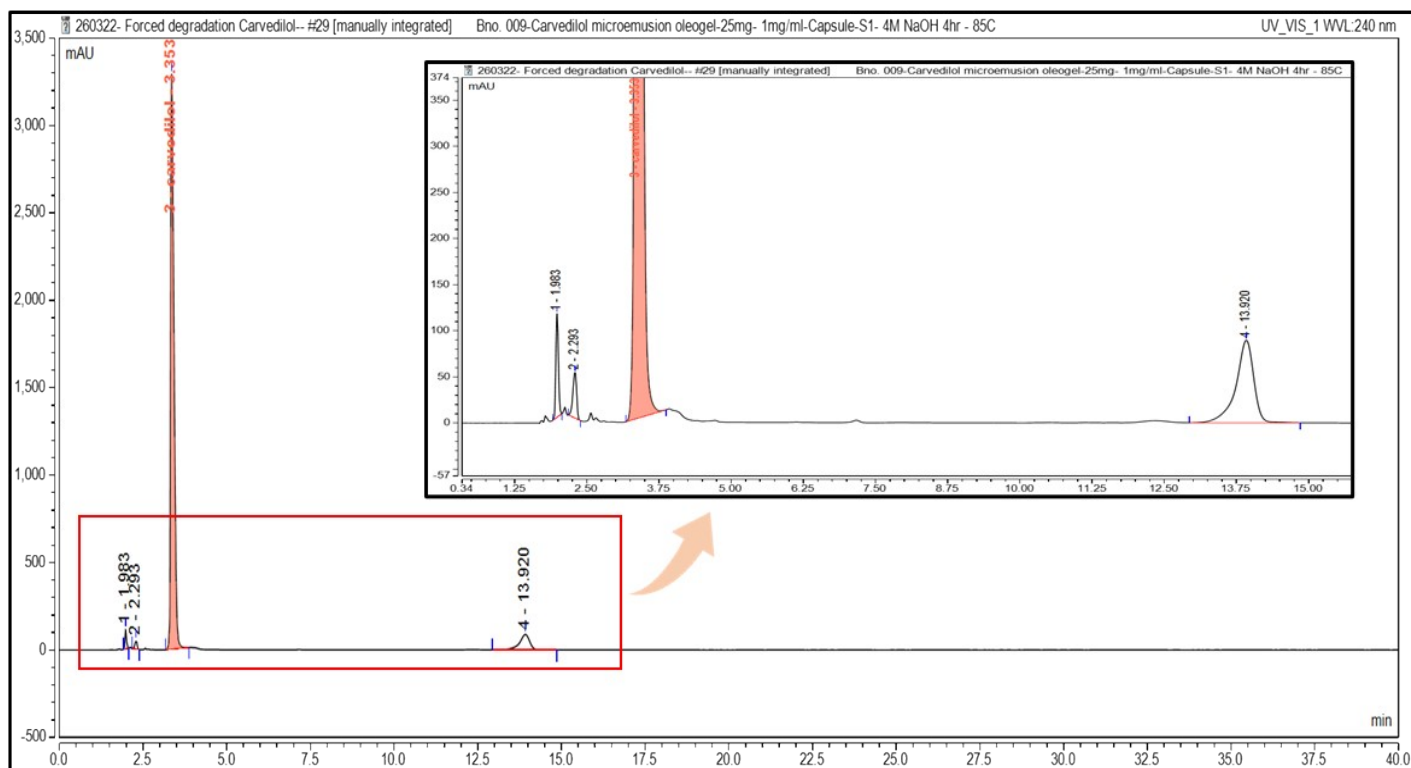

**Figure 87S.** HPLC chromatogram of base hydrolysis of CARV-MEOG, 4.0 M NaOH for 4 h at 85 °C.

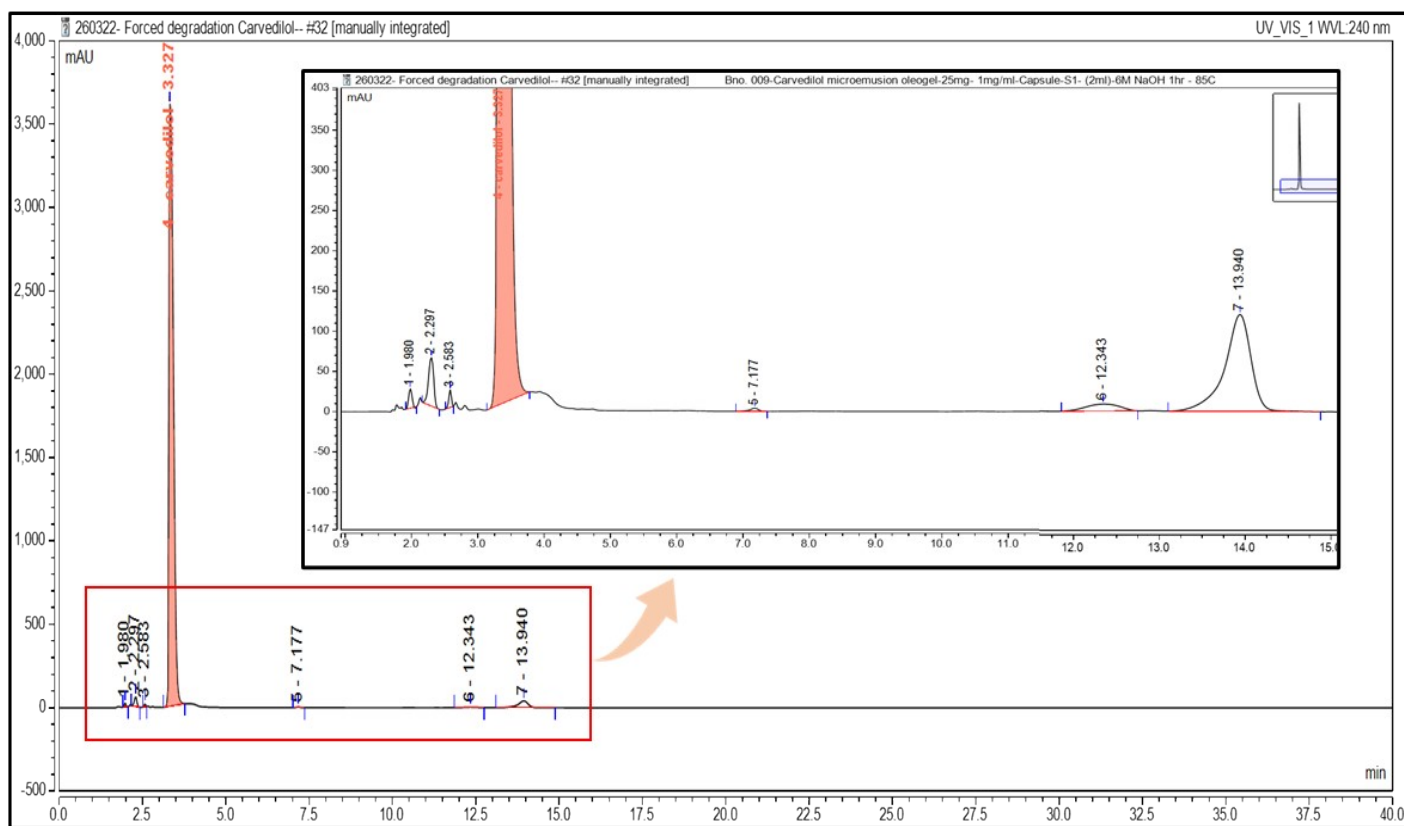

**Figure 88S.** HPLC chromatogram of base hydrolysis of CARV-MEOG, 6.0 M NaOH (2ml) for 1 h at 85 °C.

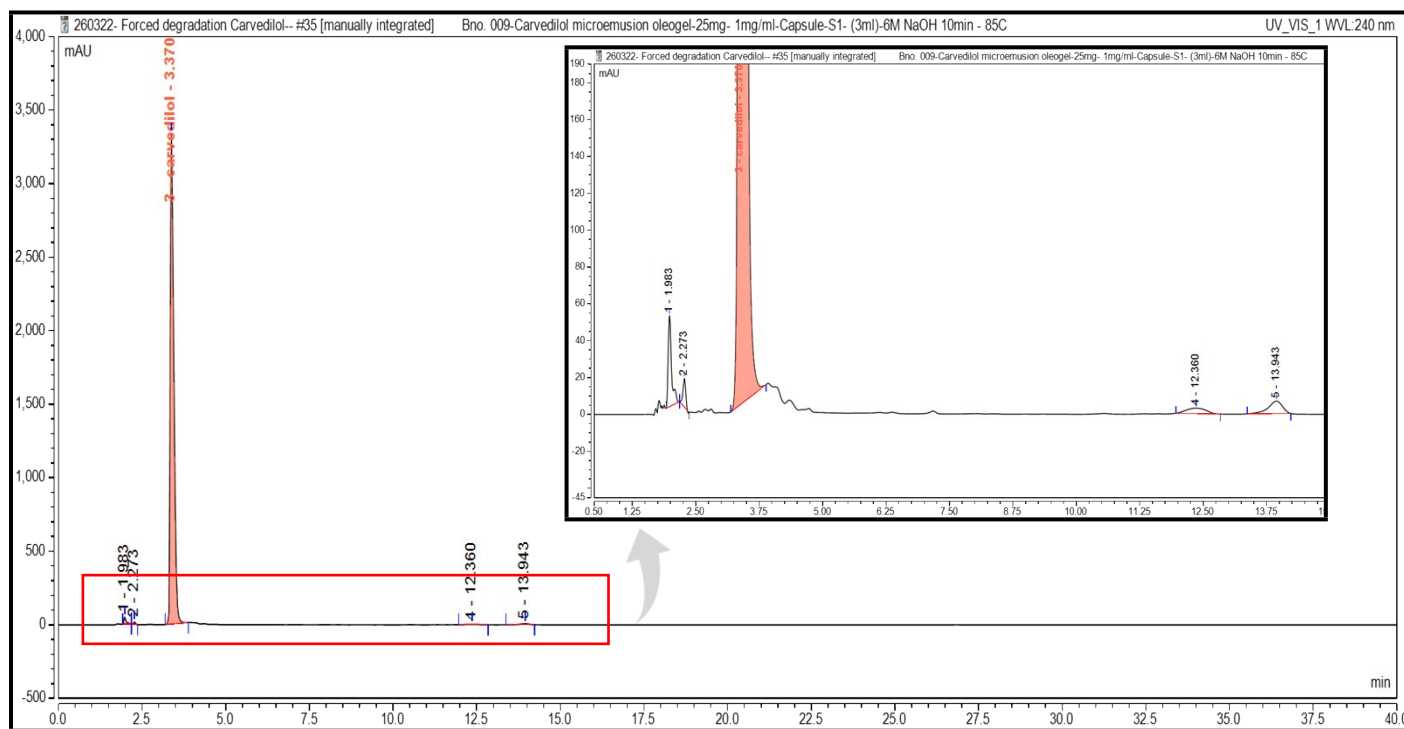

**Figure 89S.** HPLC chromatogram of base hydrolysis of CARV-MEOG, 6.0 M NaOH for 10 min at 85 °C.

## Excipient- Base Degradation:

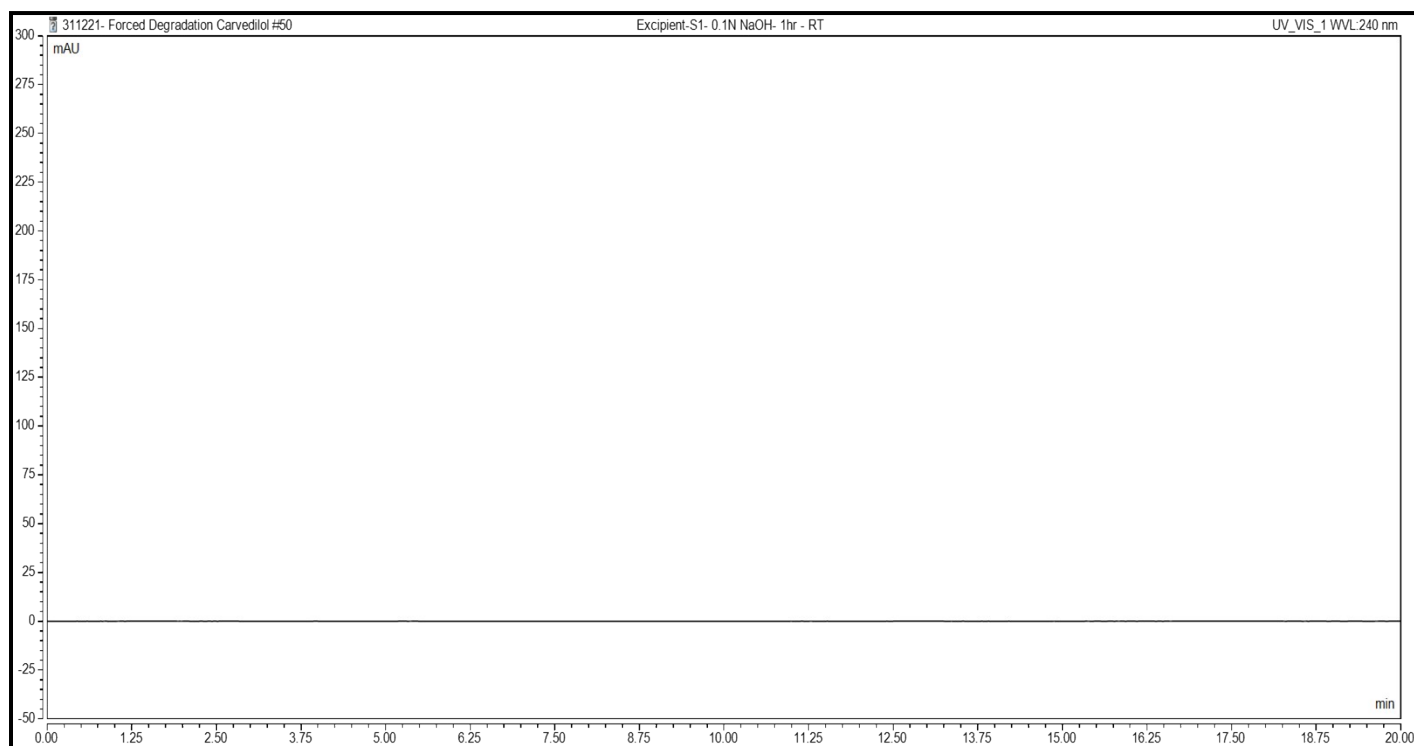

**Figure 90S.** HPLC chromatogram of base hydrolysis of excipients, 0.1 M NaOH for 1 h at RT.

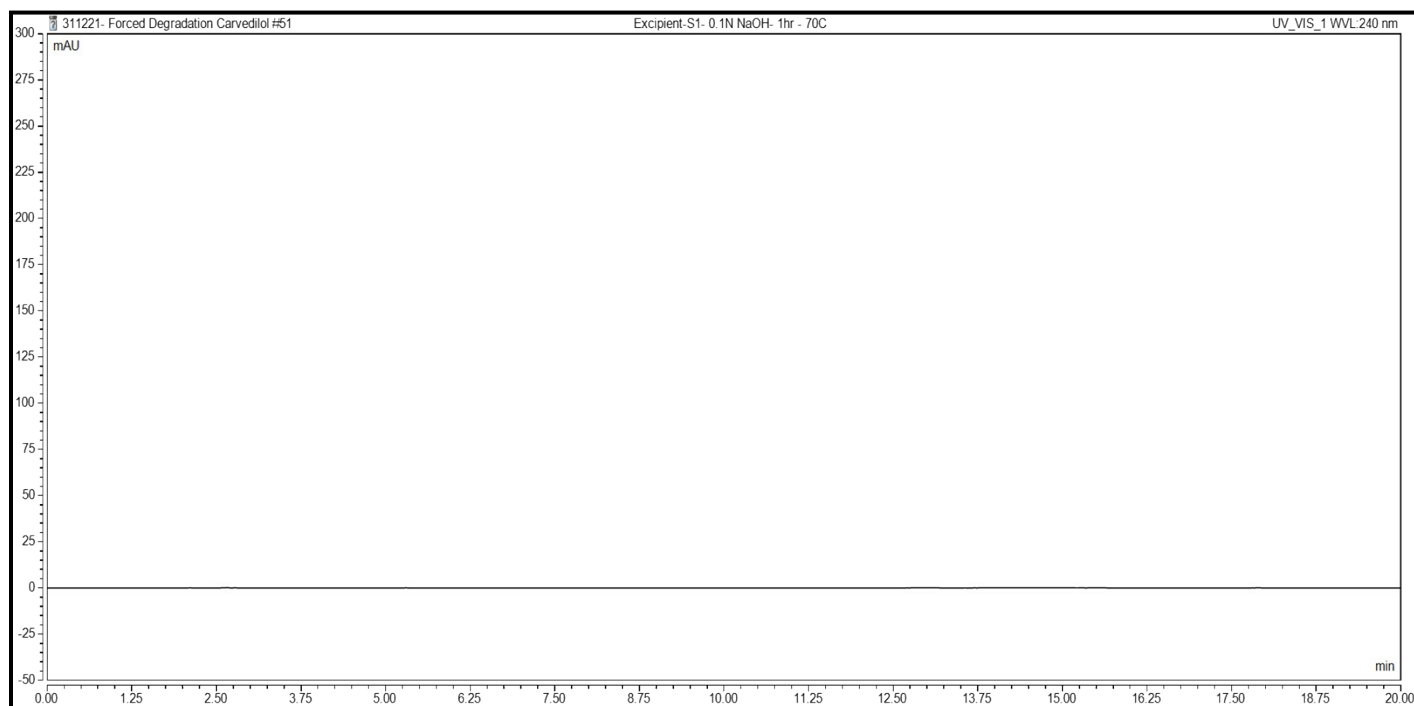

**Figure 91S.** HPLC chromatogram of base hydrolysis of excipients, 0.1 M NaOH for 1 h at 70 °C.

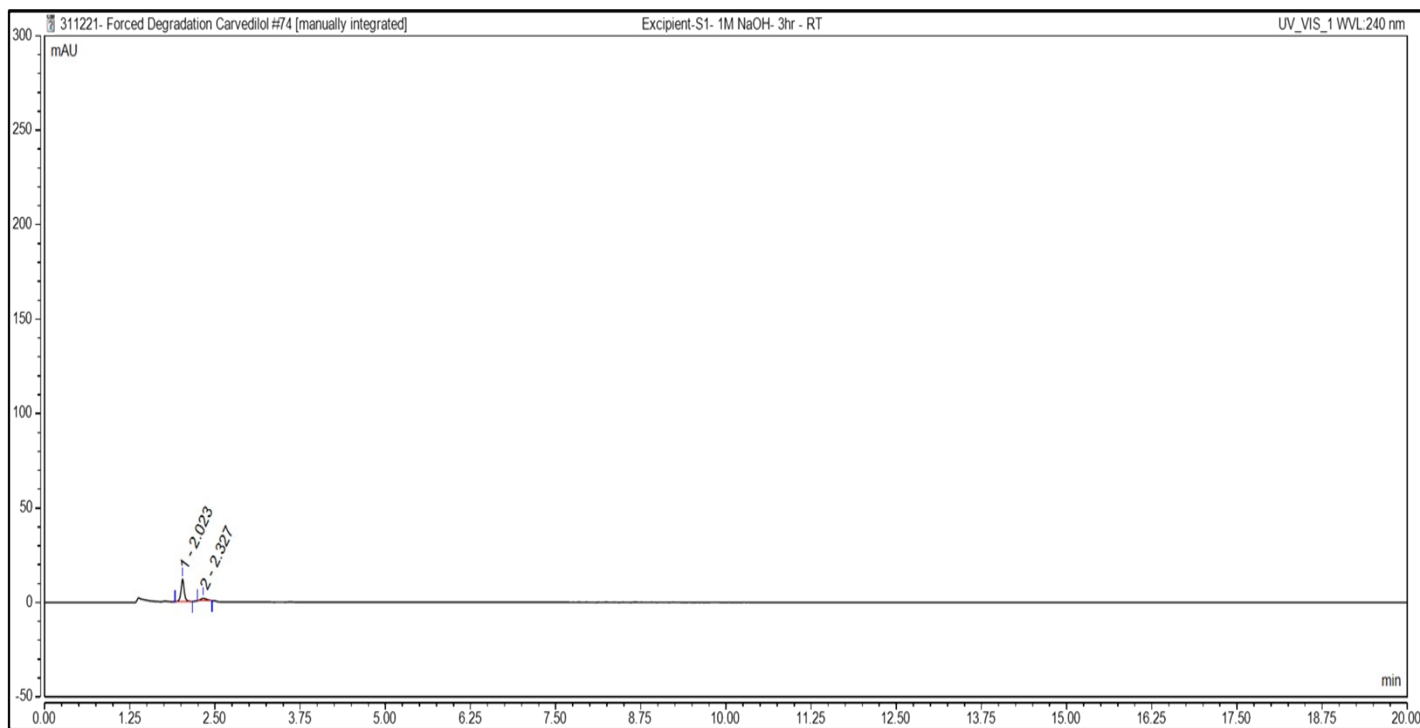

**Figure 92S.** HPLC chromatogram of base hydrolysis of excipient, 1.0 M NaOH for 3 h at RT.

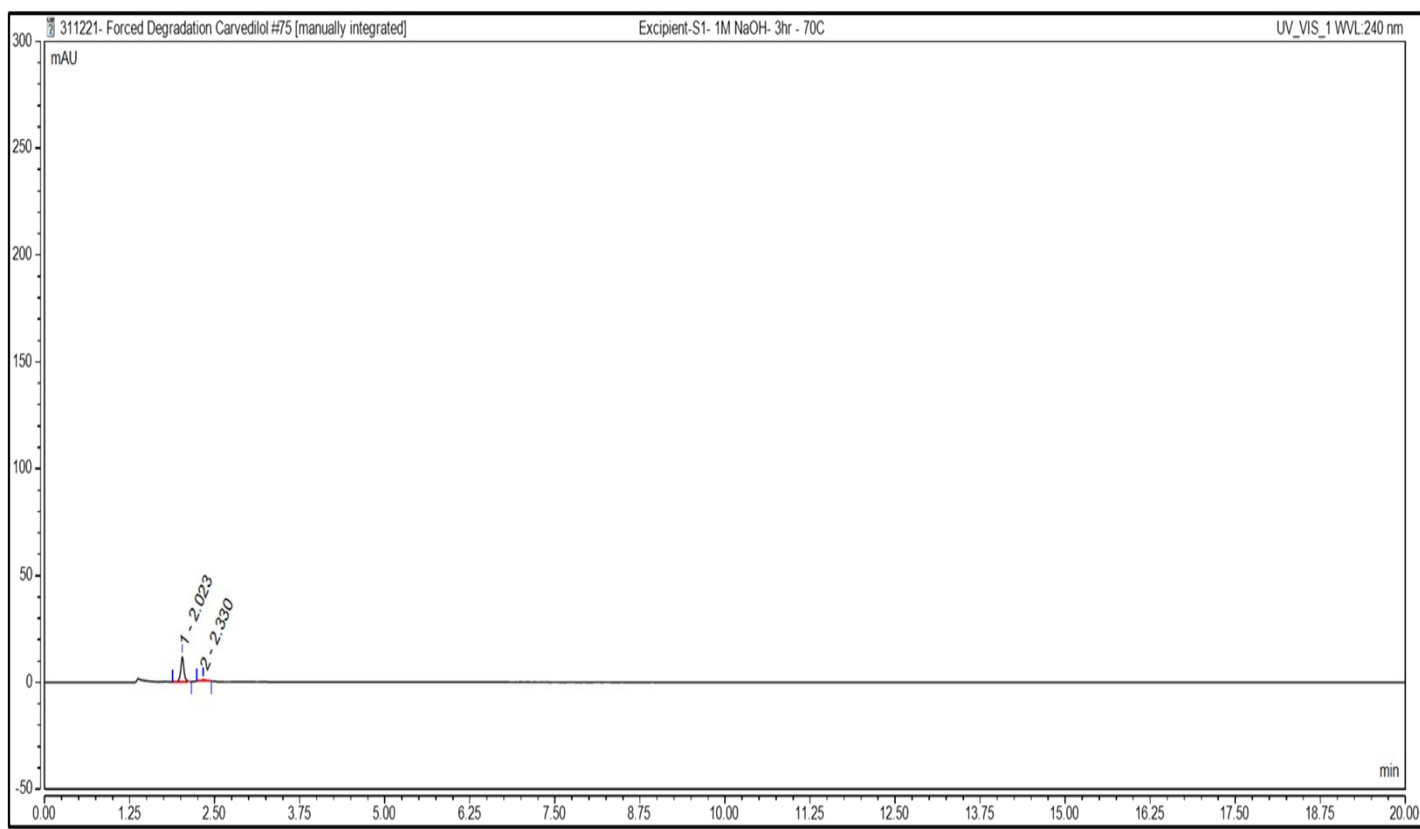

**Figure 93S.** HPLC chromatogram of base hydrolysis of excipient, 1.0 M NaOH for 3 h at 70 °C.

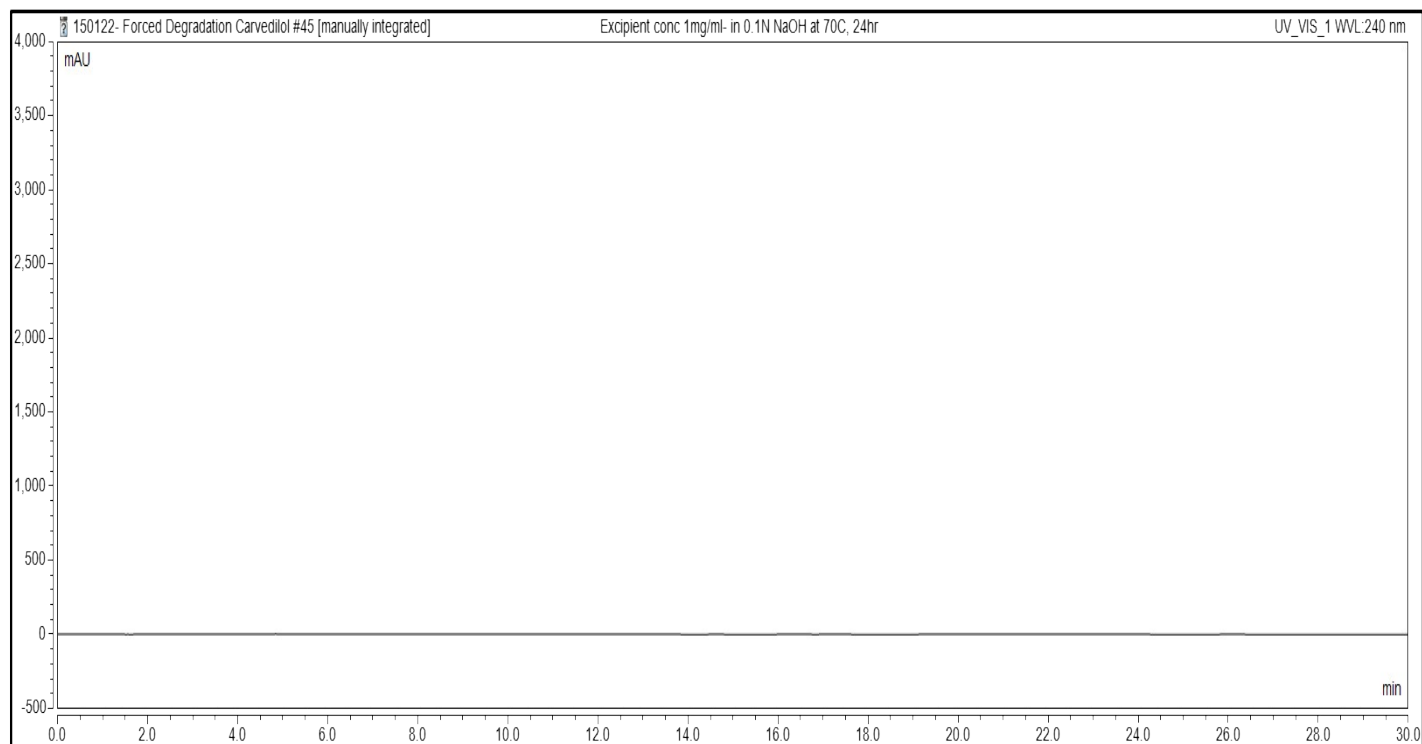

**Figure 94S.** HPLC chromatogram of base hydrolysis of excipient, 0.1 M NaOH for 24 h at 70 °C.

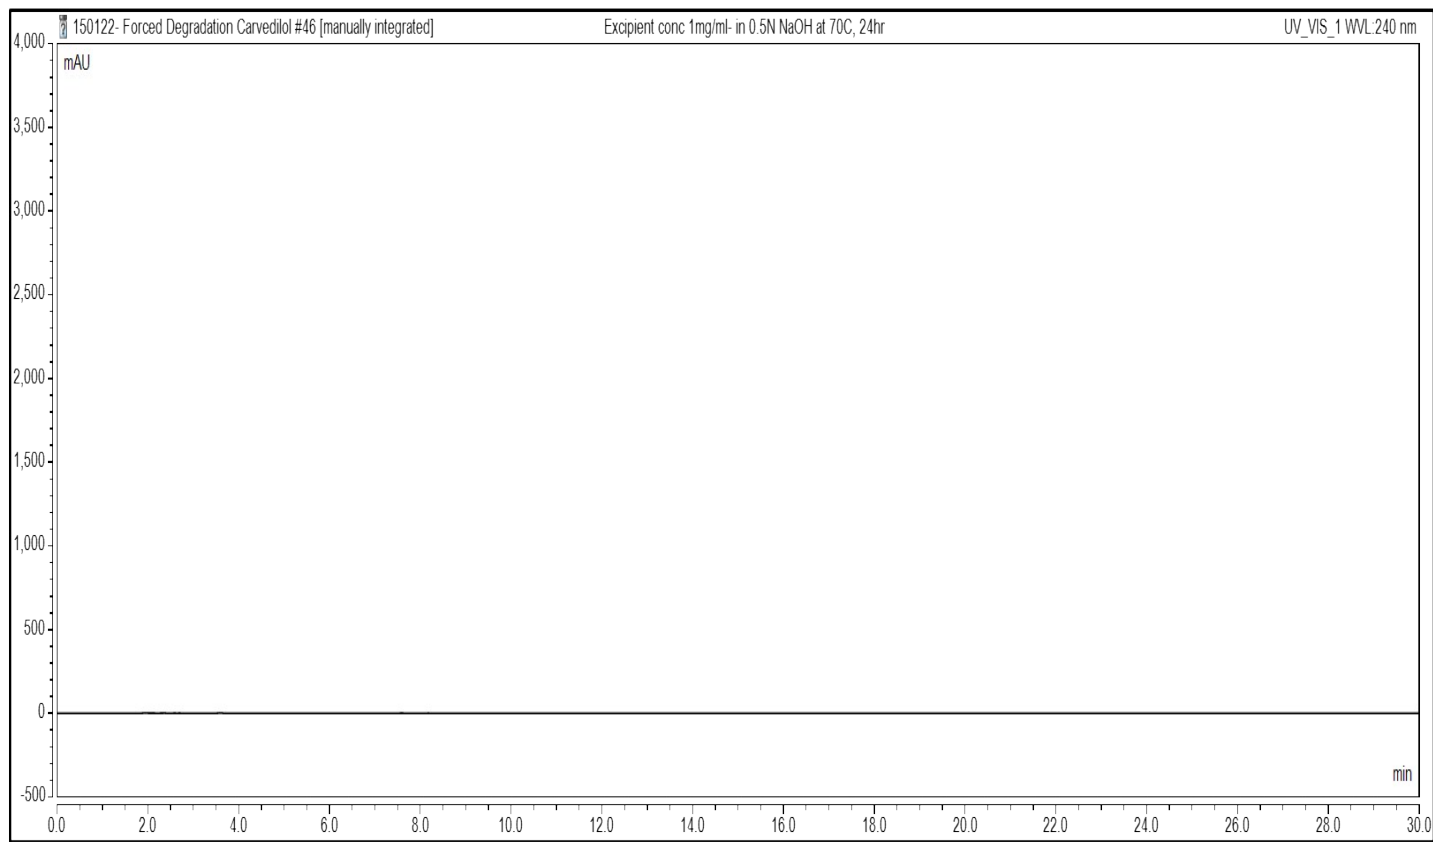

**Figure 95S.** HPLC chromatogram of base hydrolysis of excipient, 0.5 M NaOH for 24 h at 70 °C.



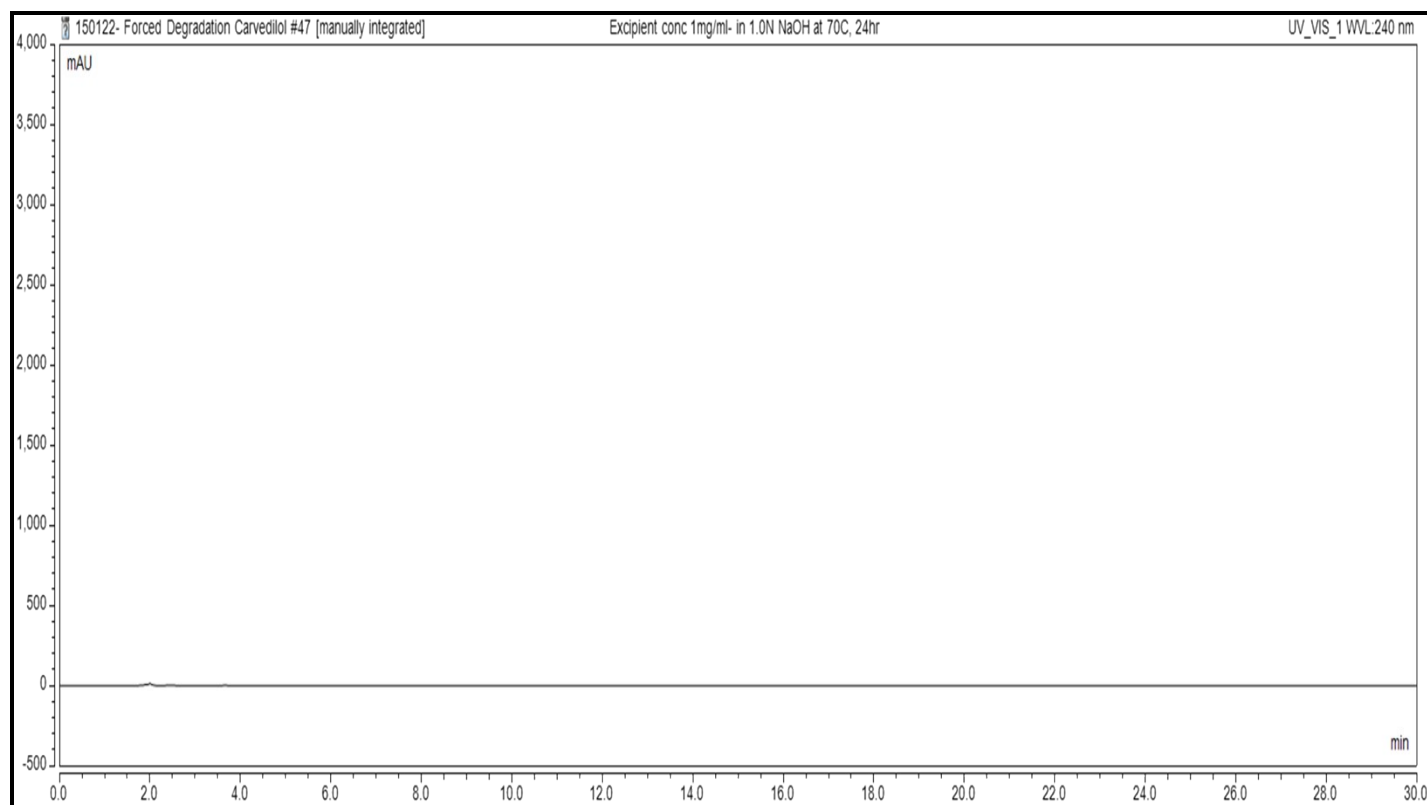

**Figure 96S.** HPLC chromatogram of base hydrolysis of excipient, 1.0 M NaOH for 24 h at 70 °C.

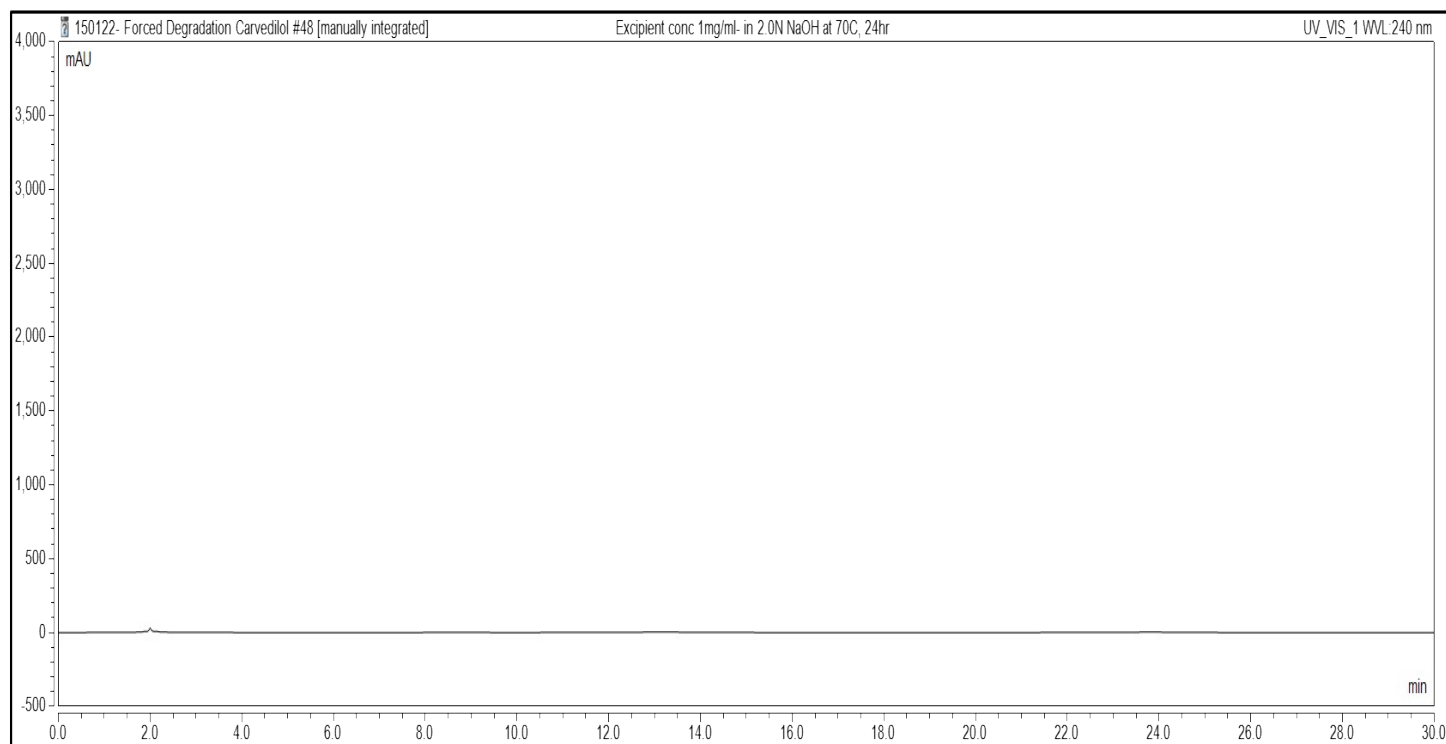

**Figure 97S.** HPLC chromatogram of base hydrolysis of excipient, 2.0 M NaOH for 24 h at 70 °C.

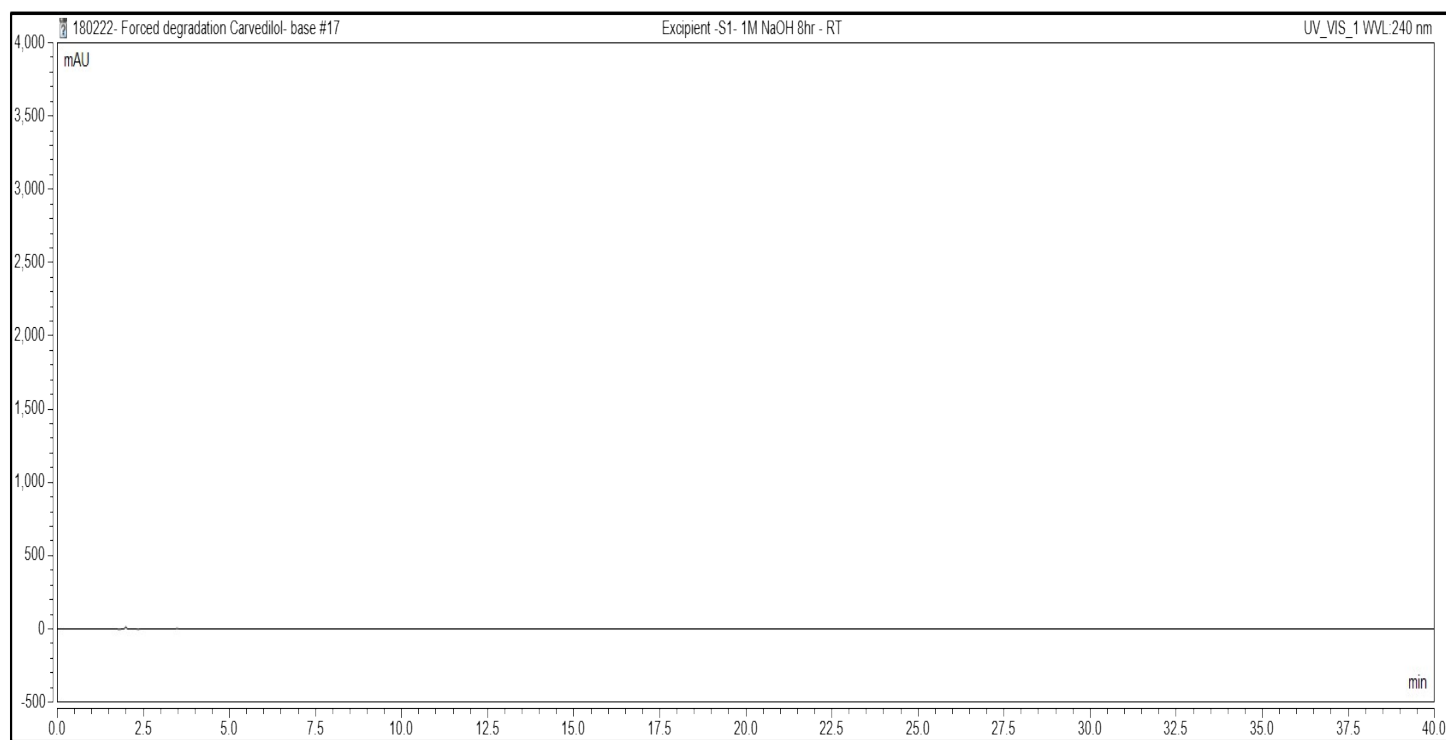

**Figure 98S.** HPLC chromatogram of base hydrolysis of excipient, 1.0 M NaOH for 8 h at RT.

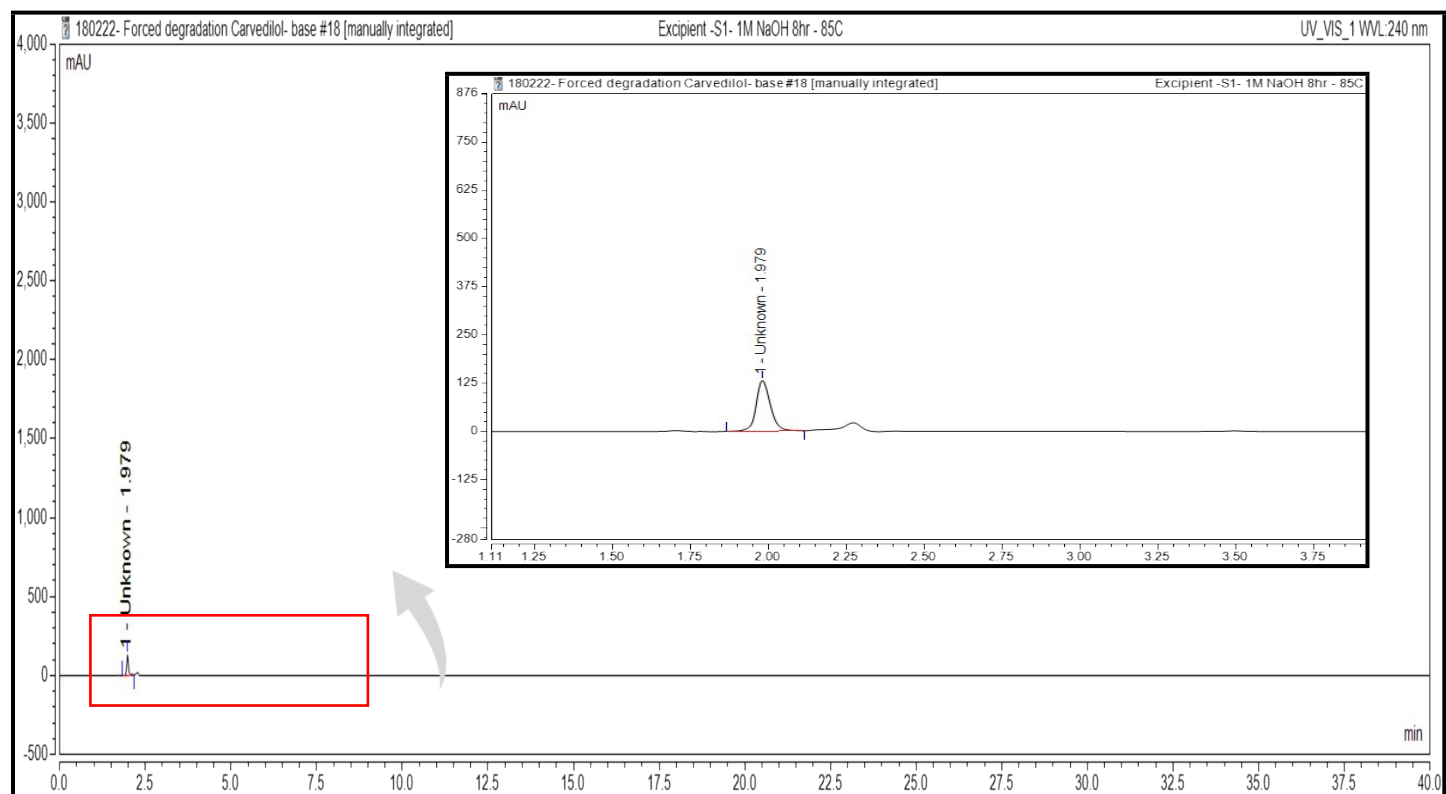

**Figure 99S.** HPLC chromatogram of base hydrolysis of excipient, 1.0 M NaOH for 8 h at 85 °C.

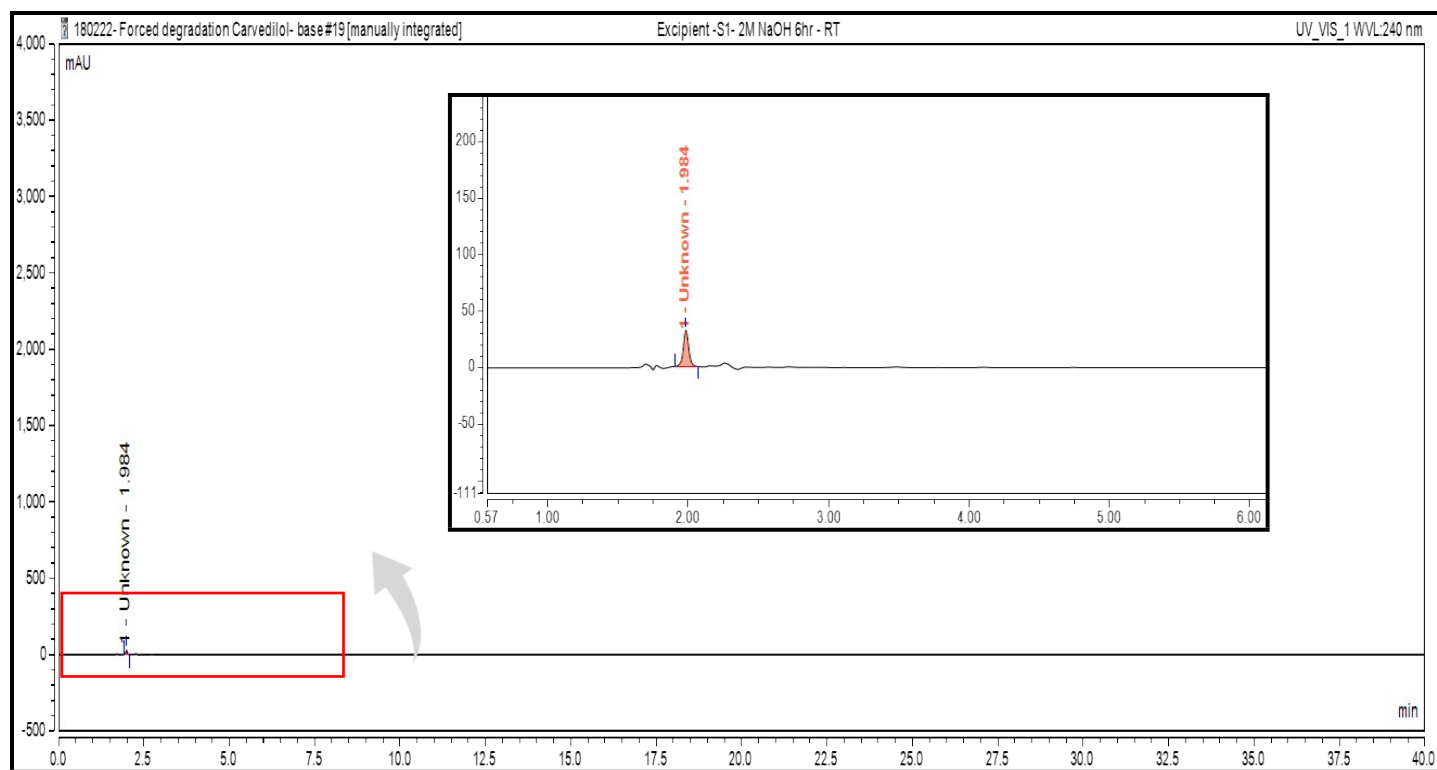

**Figure 100S.** HPLC chromatogram of base hydrolysis of excipient, 2.0 M NaOH for 6 h at RT.

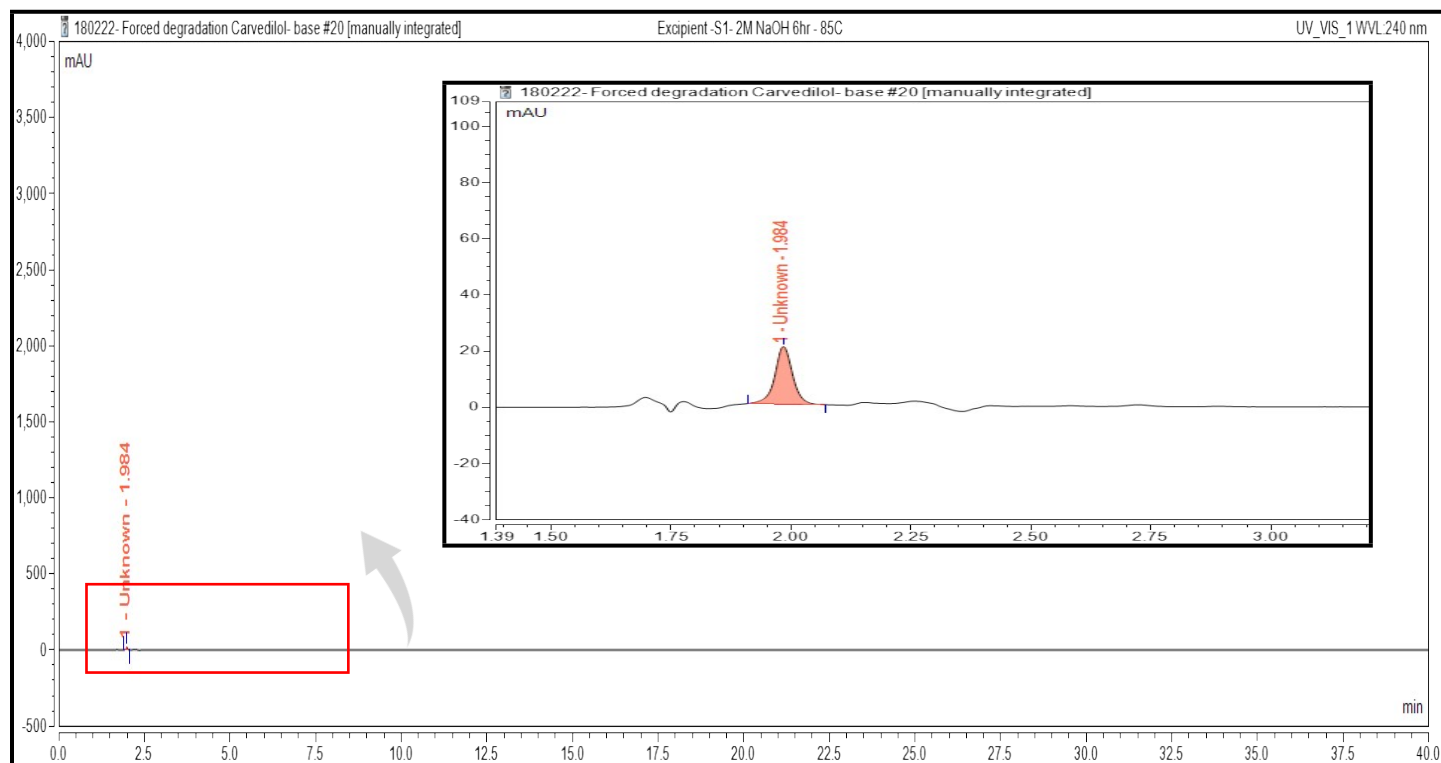

**Figure 101S.** HPLC chromatogram of base hydrolysis of excipient, 2.0 M NaOH for 6 h at 85 °C.

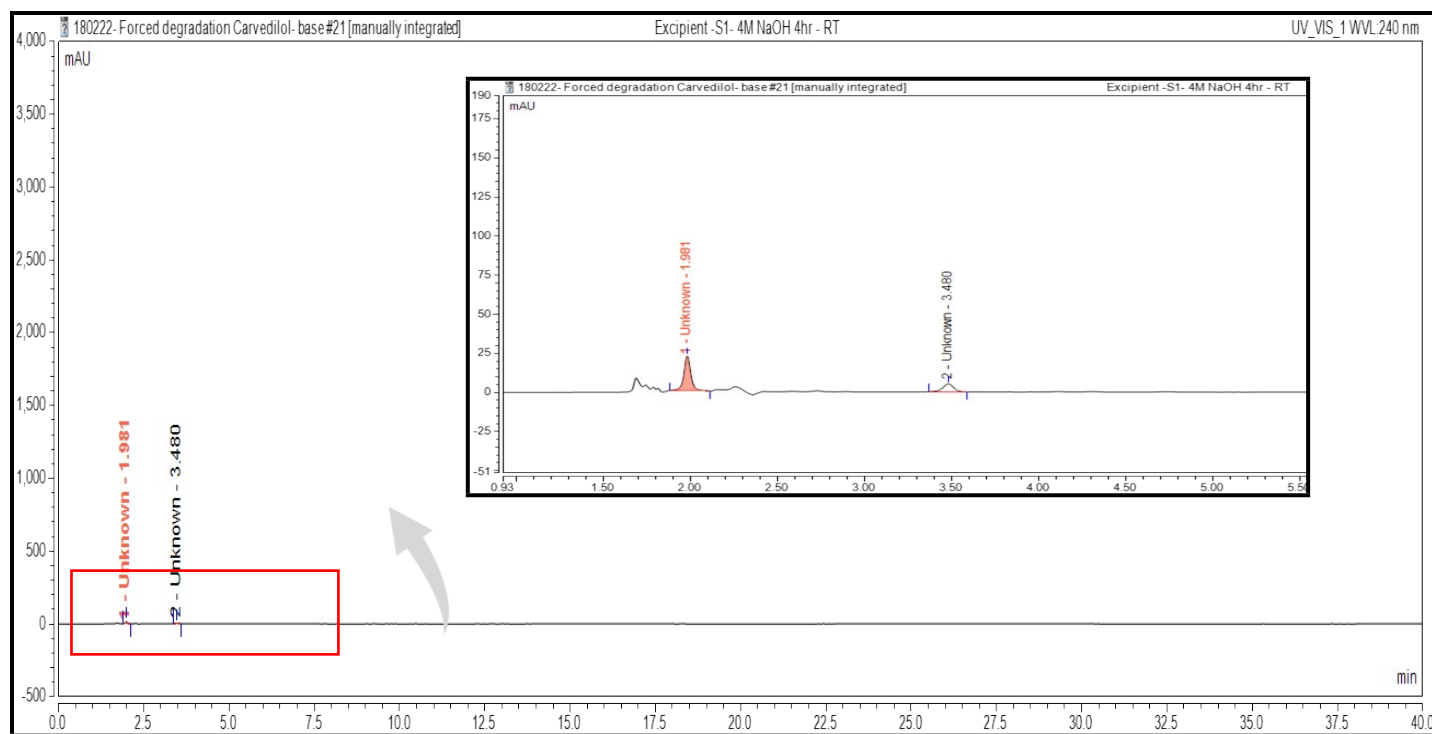

**Figure 102S.** HPLC chromatogram of base hydrolysis of excipient, 4.0 M NaOH for 4 h at RT.

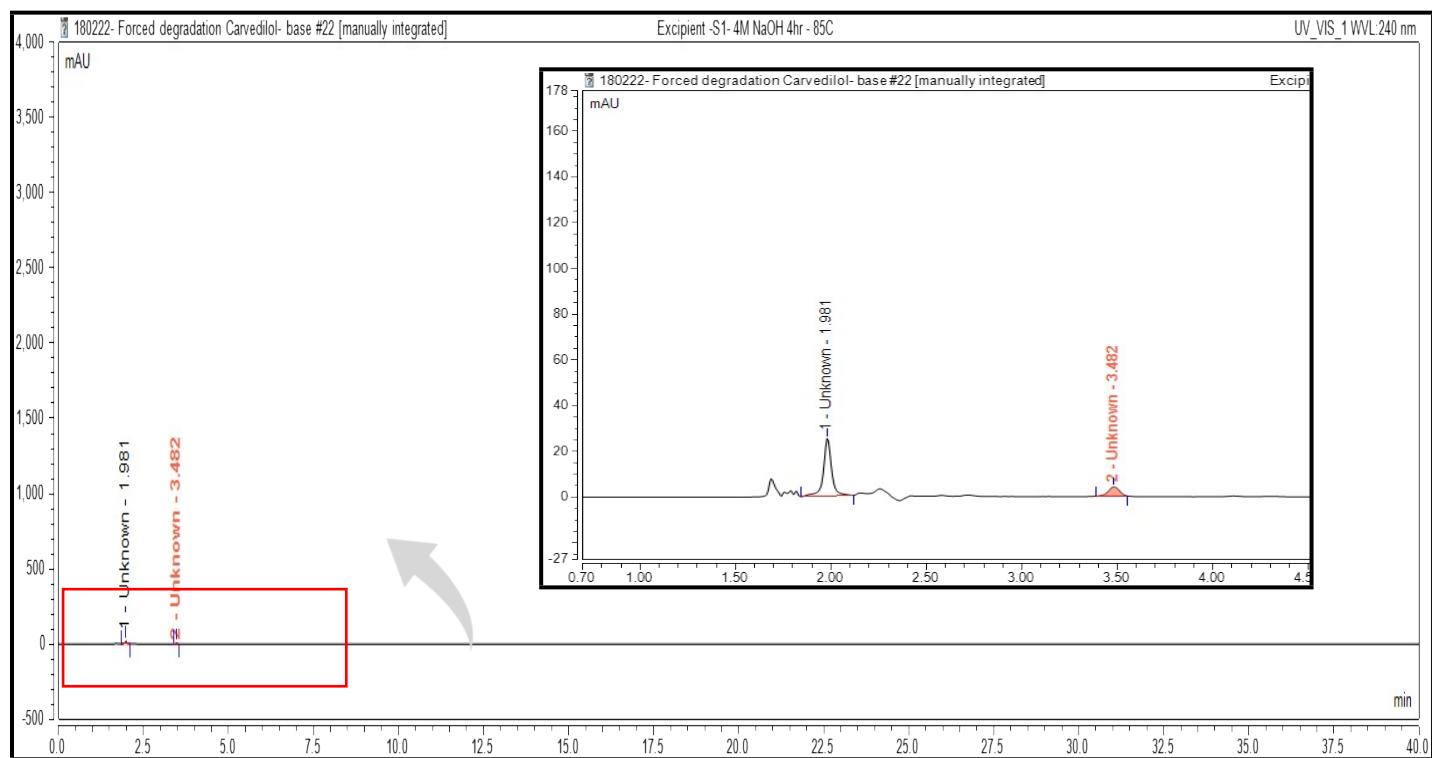

**Figure 103S.** HPLC chromatogram of base hydrolysis of excipient, 4.0 M NaOH for 4 h at 85 °C.

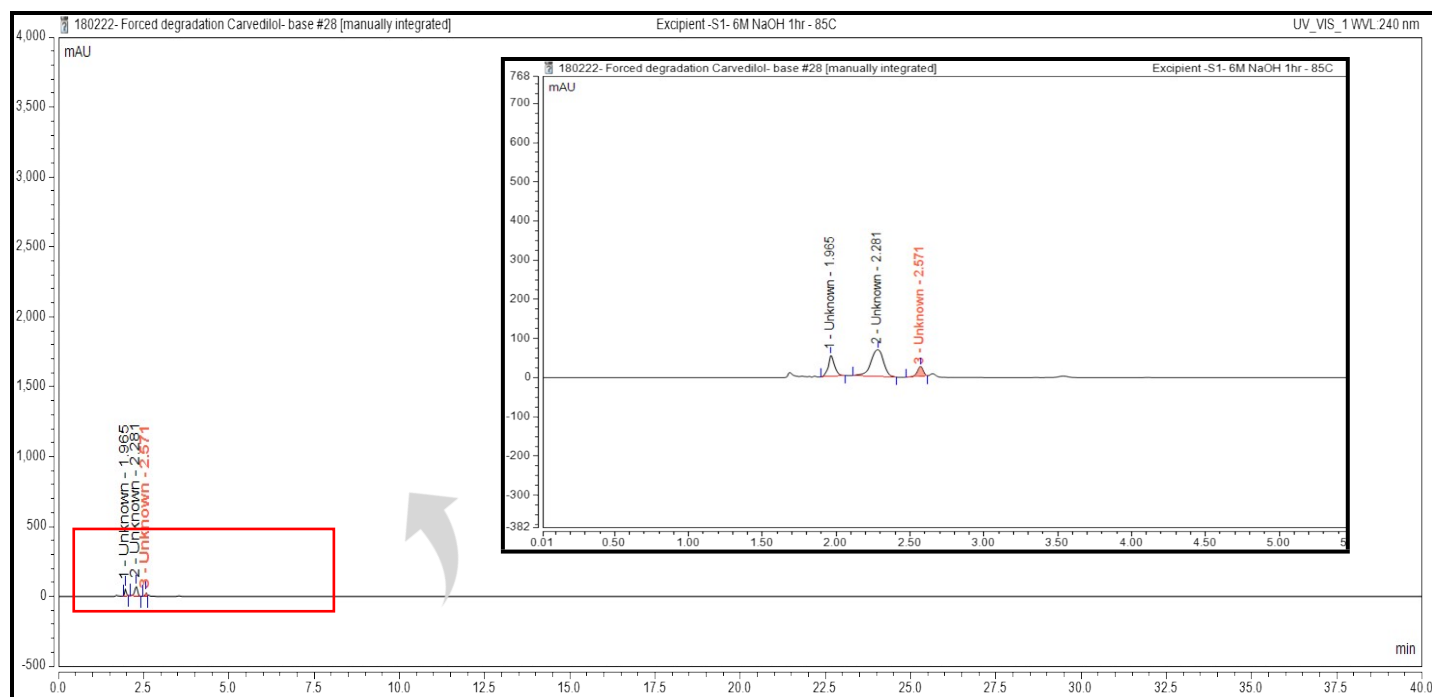

**Figure 104S.** HPLC chromatogram of base hydrolysis of excipient, 6.0 M NaOH for 1 h at 85 °C.

## Neutral aqueous hydrolysis CARV:

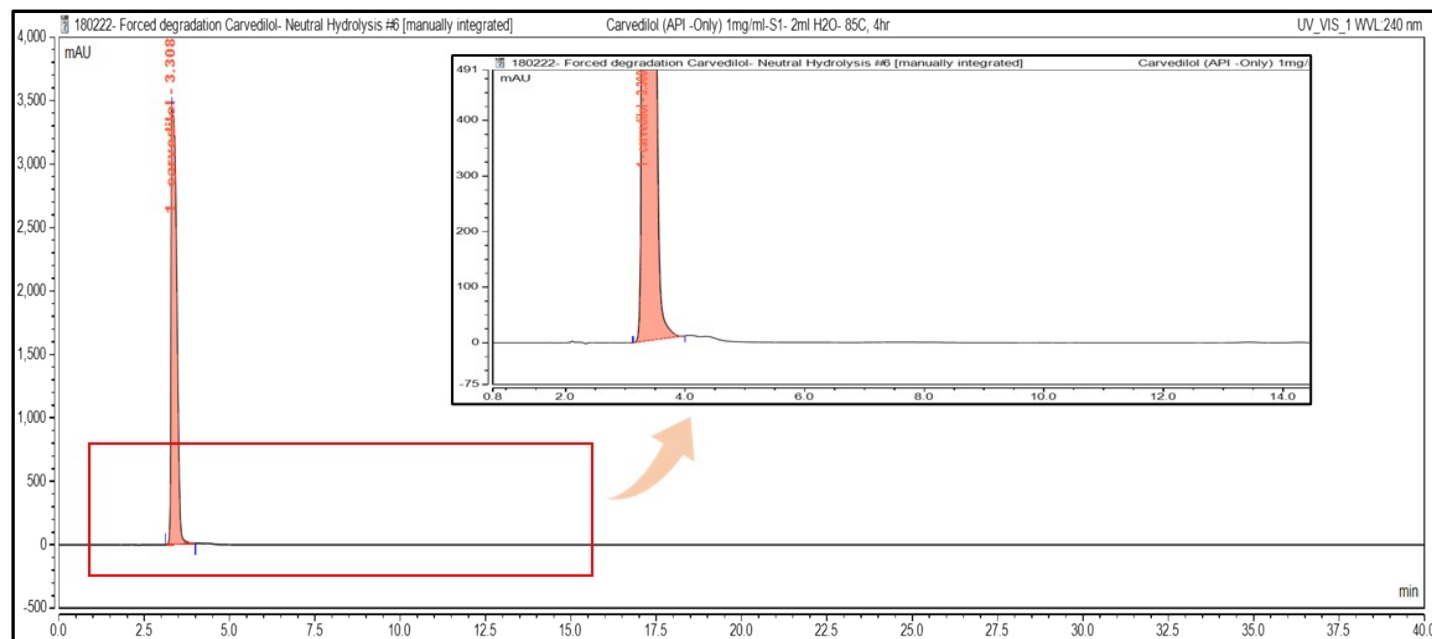

**Figure 105S.** HPLC chromatogram of neutral hydrolysis of CARV for 4 h at 85 °C.

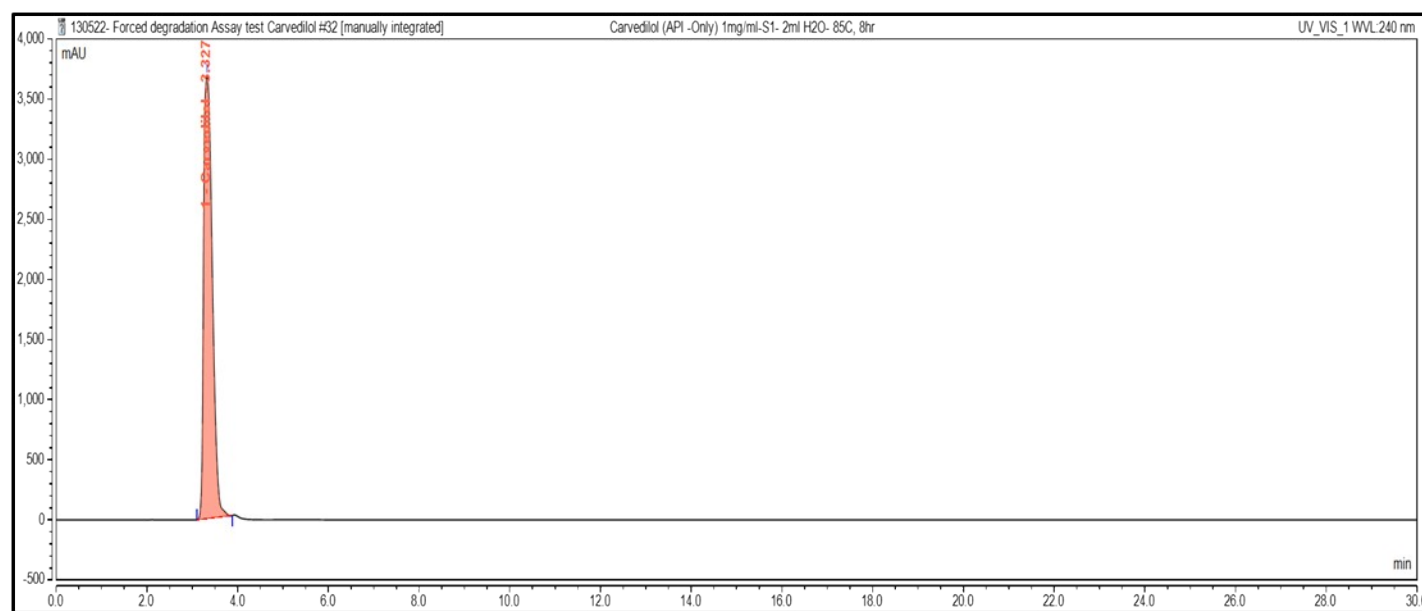

**Figure 106S.** HPLC chromatogram of neutral hydrolysis of CARV for 8 h at 85 °C.

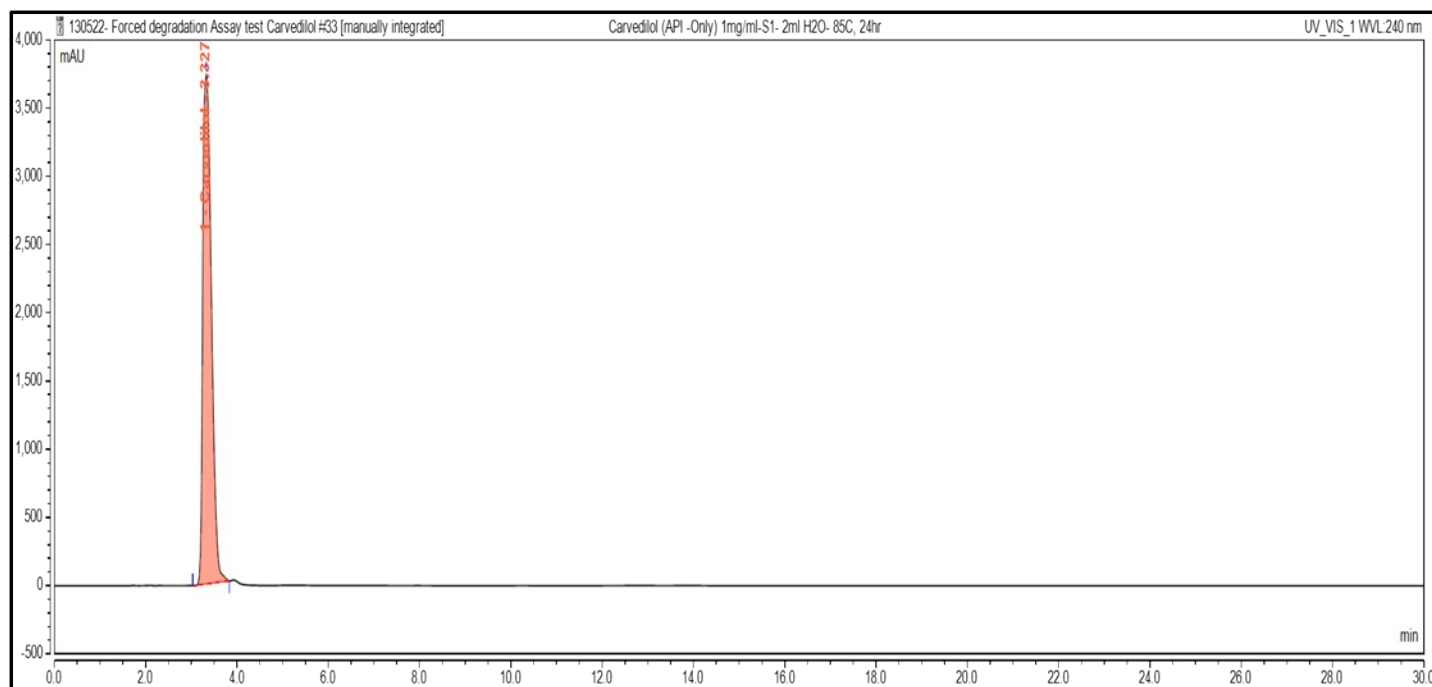

**Figure 107S.** HPLC chromatogram of neutral hydrolysis of CARV for 24 h at 85 °C.

### Neutral aqueous hydrolysis CARV-MEOG:

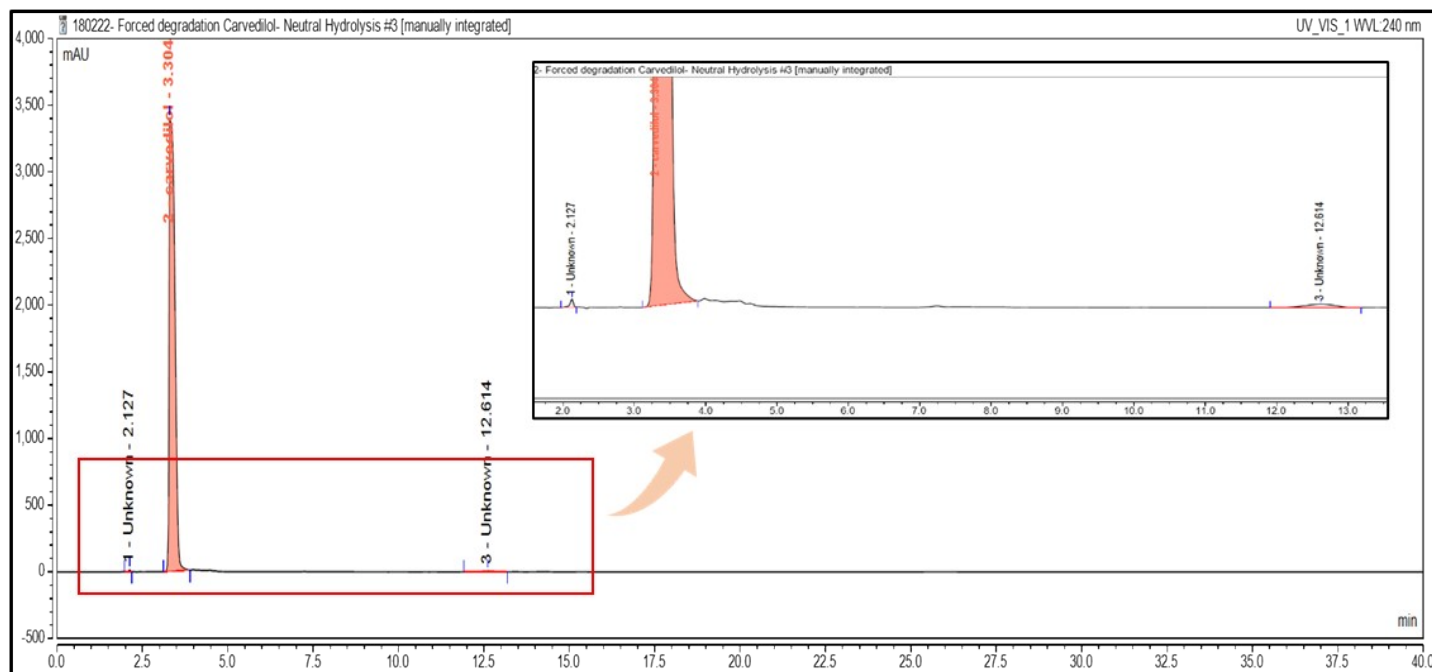

**Figure 108S.** HPLC chromatogram of neutral hydrolysis of CARV-MEOG for 4 h at 85 °C.

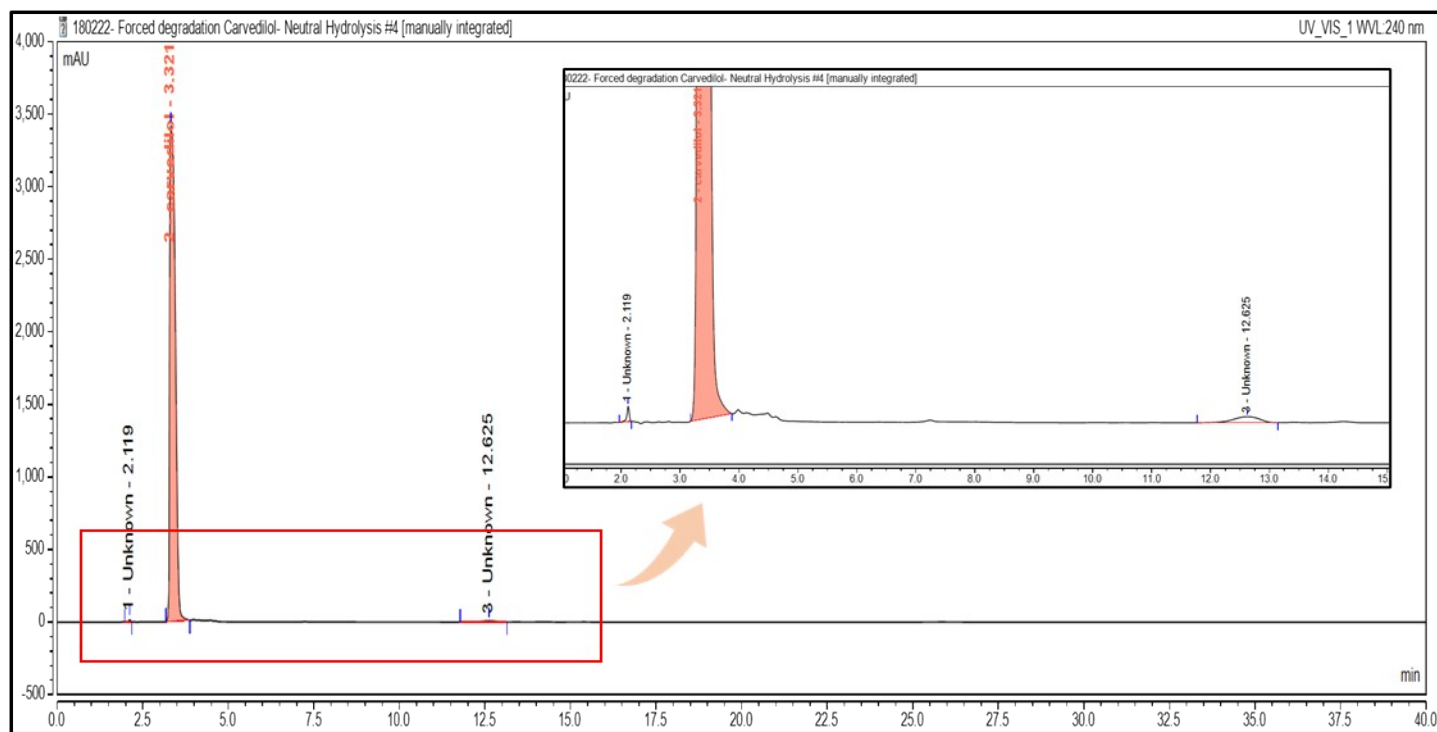

**Figure 109S.** HPLC chromatogram of neutral hydrolysis of CARV-MEOG for 8 h at 85 °C.

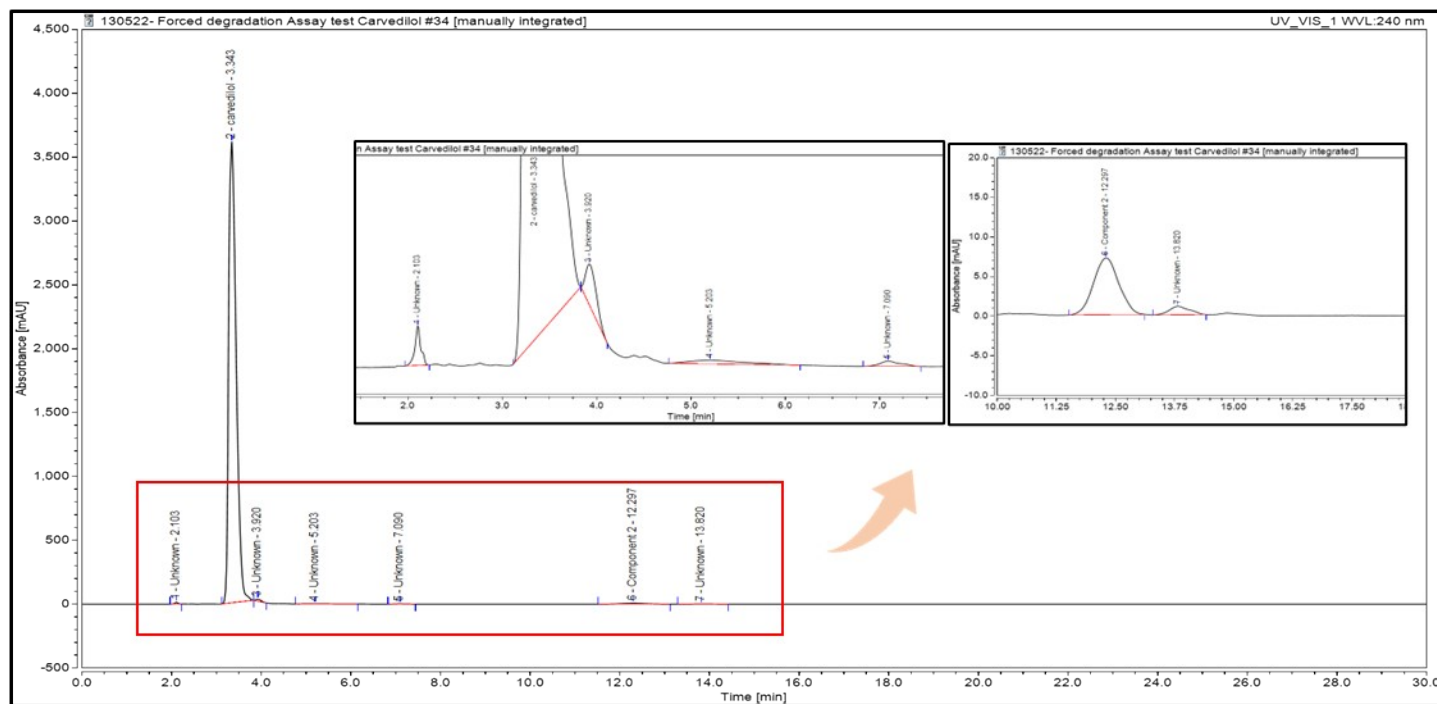

**Figure 110S.** HPLC chromatogram of neutral hydrolysis of CARV-MEOG for 24 h at 85 °C.



### Neutral aqueous hydrolysis CARV-MEOG:

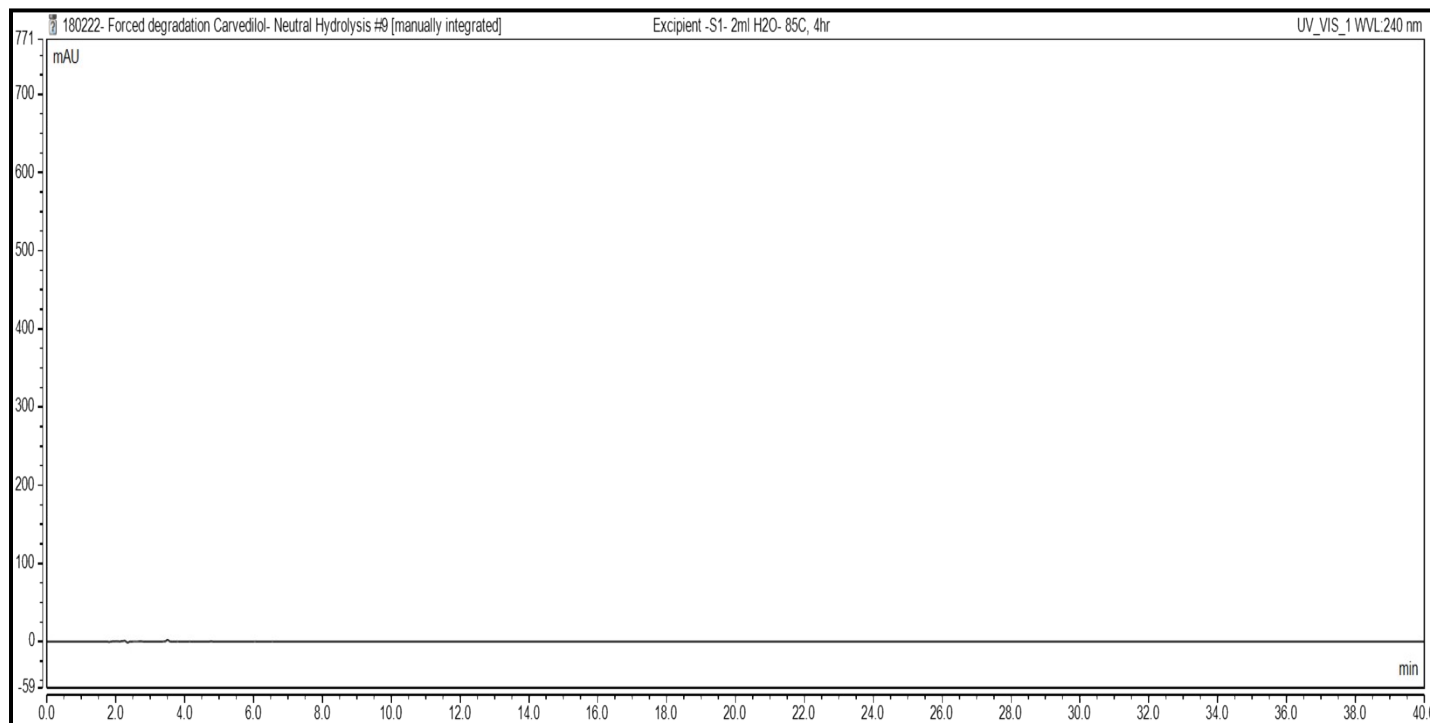

**Figure 111S.** HPLC chromatogram of neutral hydrolysis of excipient for 4 h at 85 °C.

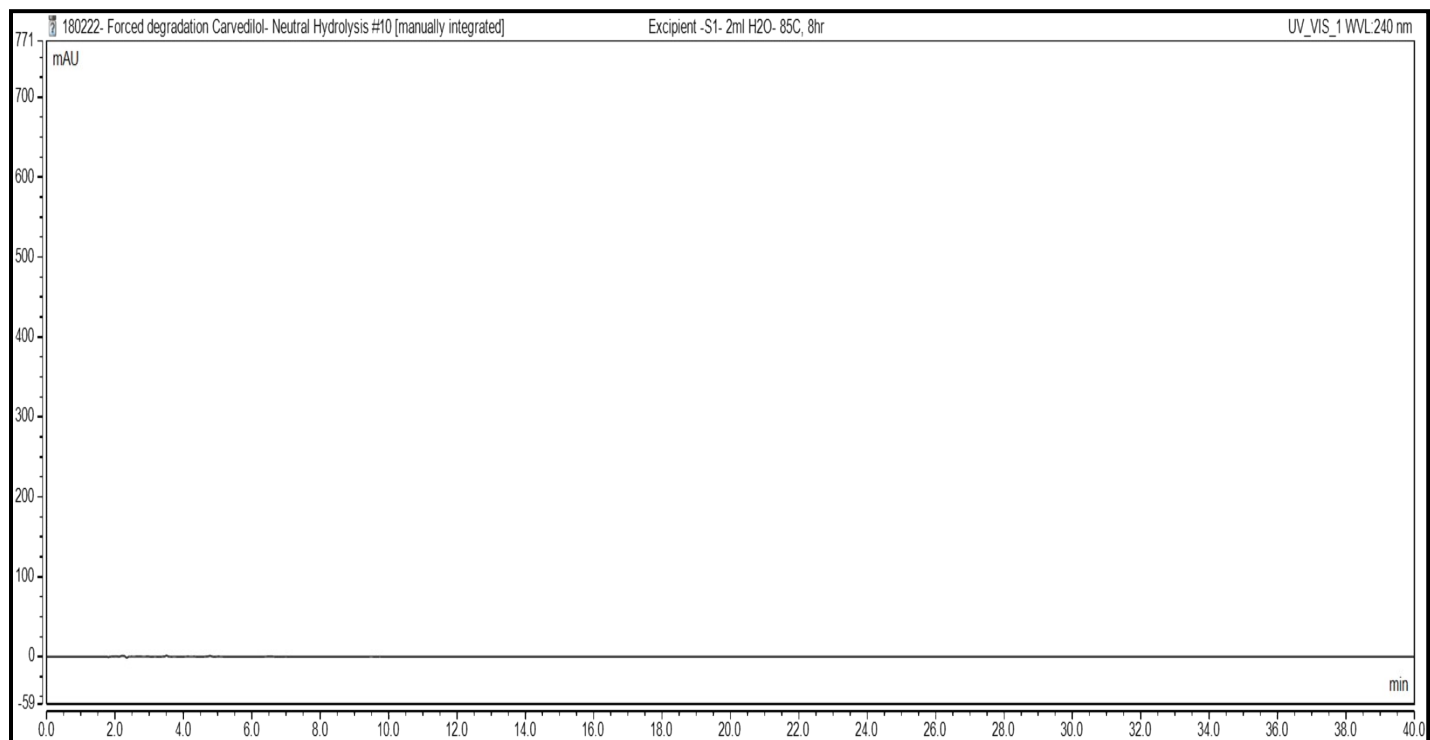

**Figure 112S.** HPLC chromatogram of neutral hydrolysis of excipient for 8 h at 85 °C.

## Oxidation Degradation-CARV

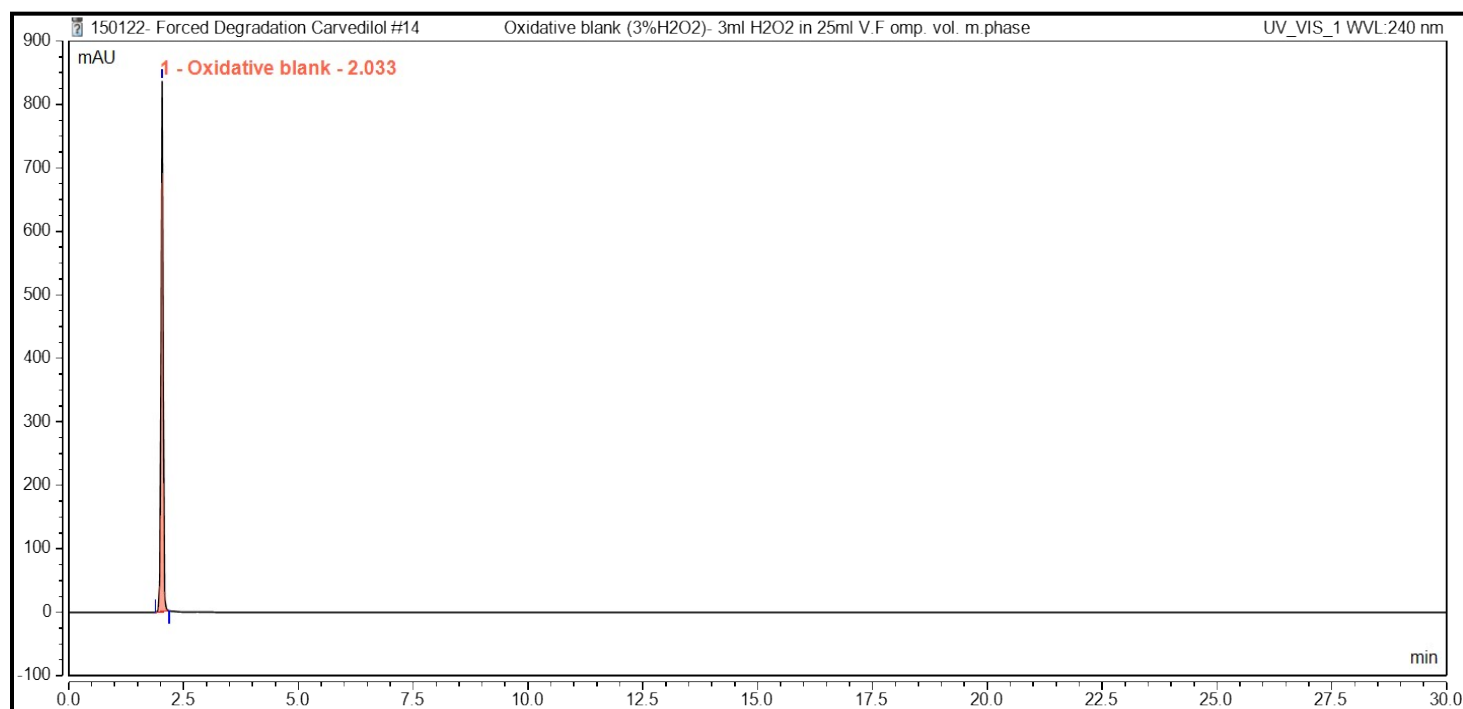

**Figure 113S.** HPLC chromatogram of oxidation blank solution (3% H<sub>2</sub>O<sub>2</sub> in mobile phase).

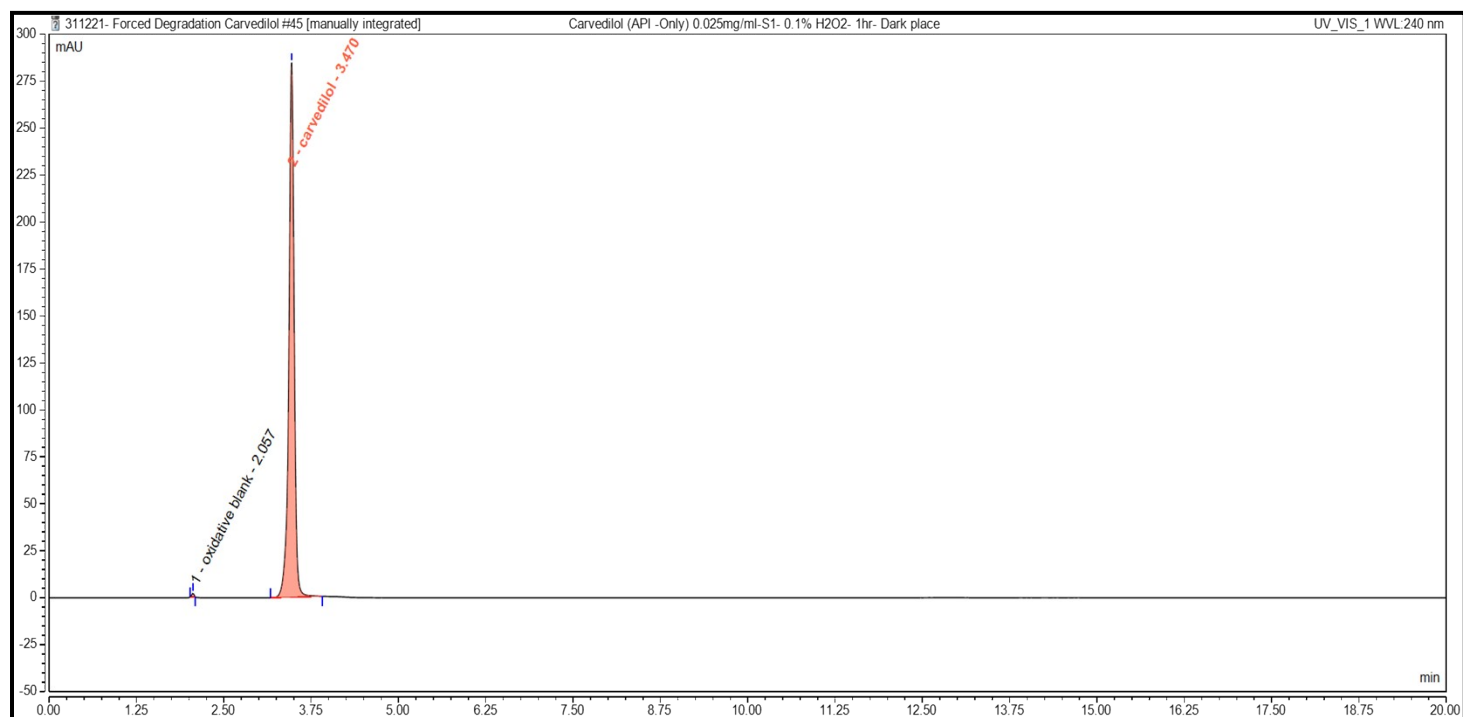

**Figure 114S.** HPLC chromatogram of oxidation degradation of CARV at 0.1% H<sub>2</sub>O<sub>2</sub> for 1 h.

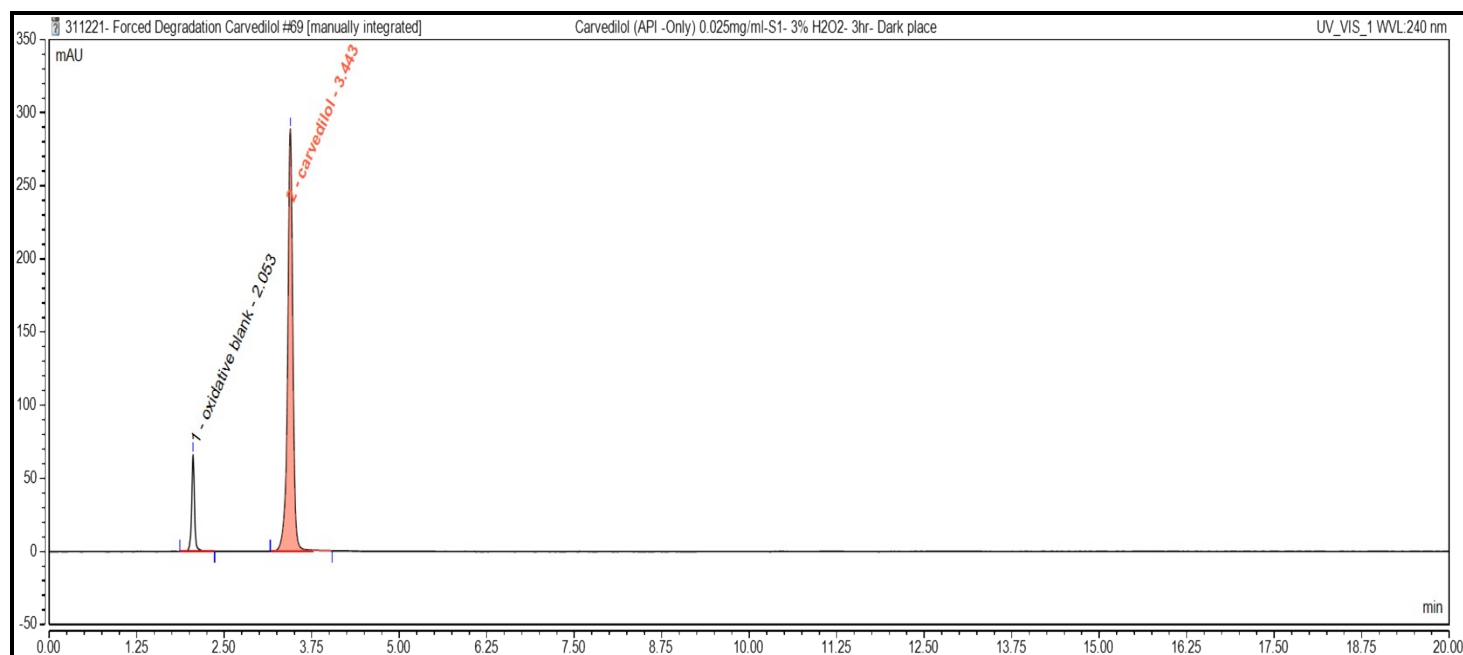

**Figure 115S.** HPLC chromatogram of oxidation degradation of CARV at 3.0% H<sub>2</sub>O<sub>2</sub> for 3 h.

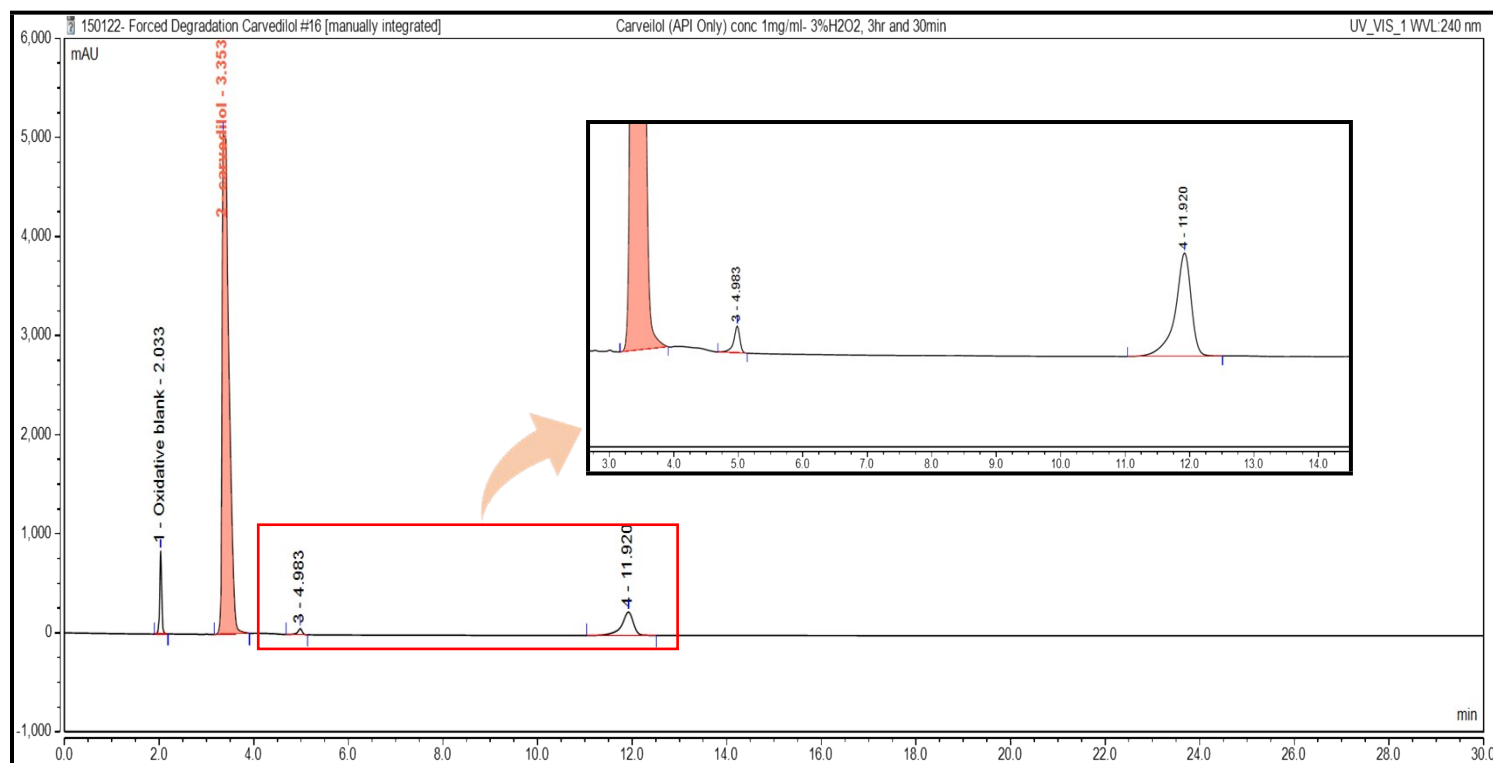

**Figure 116S.** HPLC chromatogram of oxidation degradation of CARV at 3.0% H<sub>2</sub>O<sub>2</sub> for 3 hr and 30min (210min).

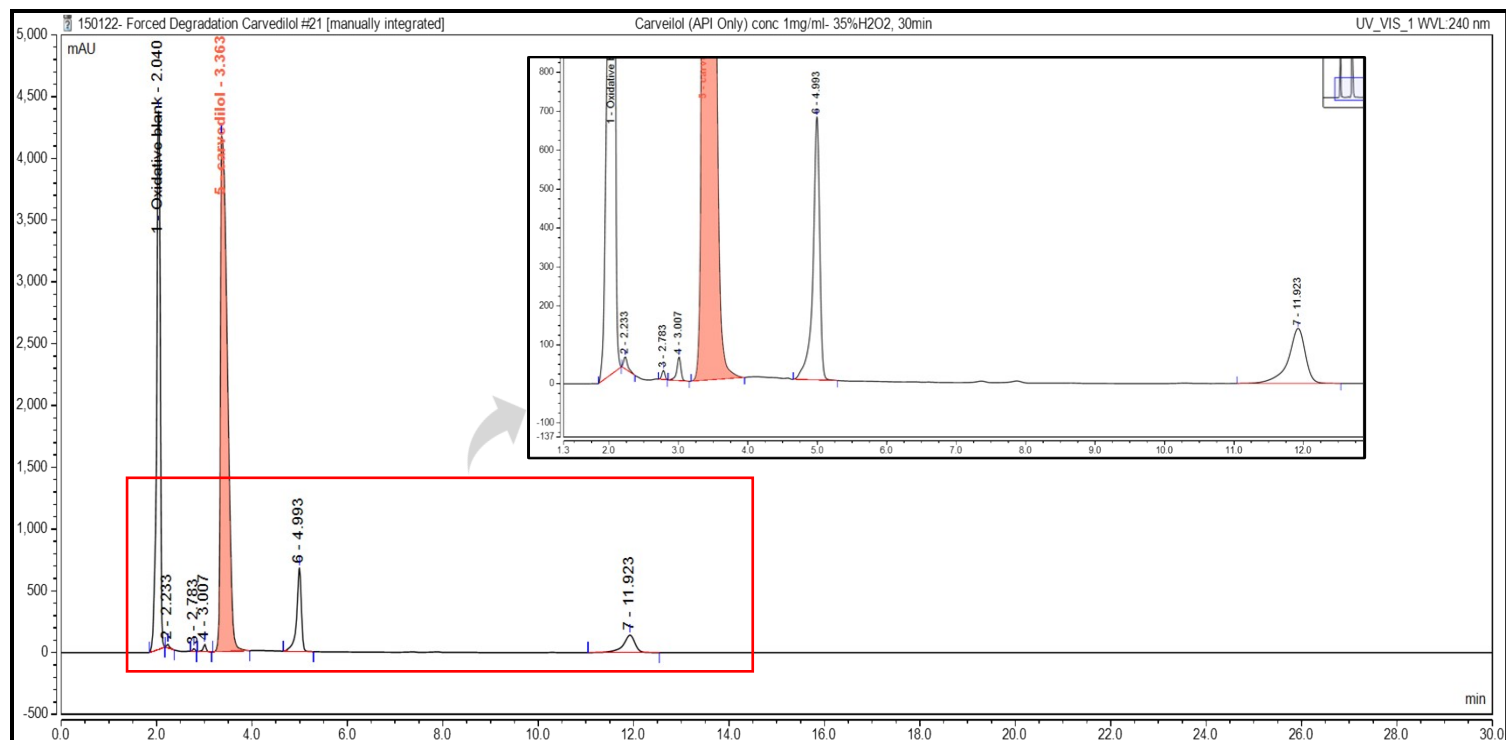

**Figure 117S.** HPLC chromatogram of oxidation degradation of CARV at 35.0% H<sub>2</sub>O<sub>2</sub> for 30 min.

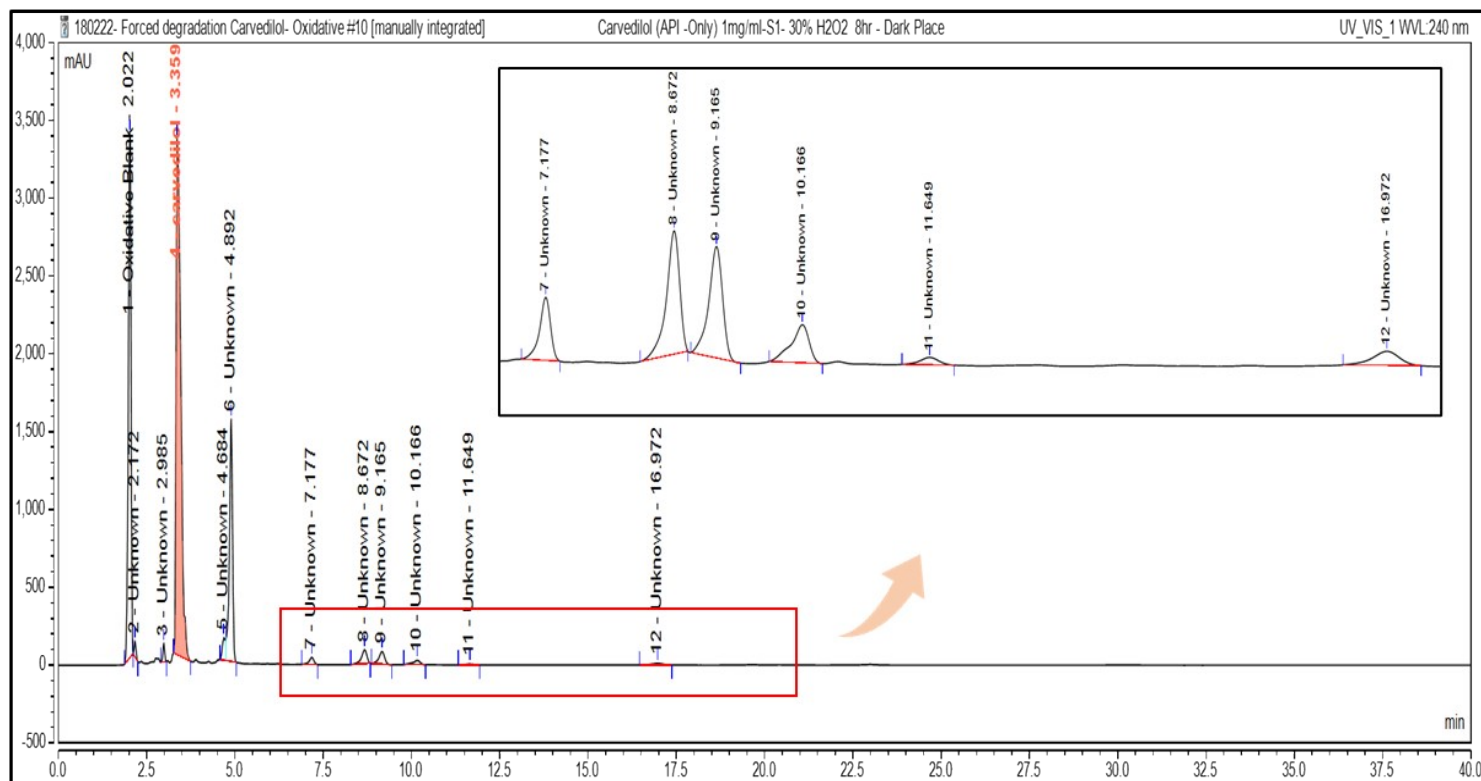

**Figure 118S.** HPLC chromatogram of oxidation degradation of CARV at 30.0% H<sub>2</sub>O<sub>2</sub> for 8 h.

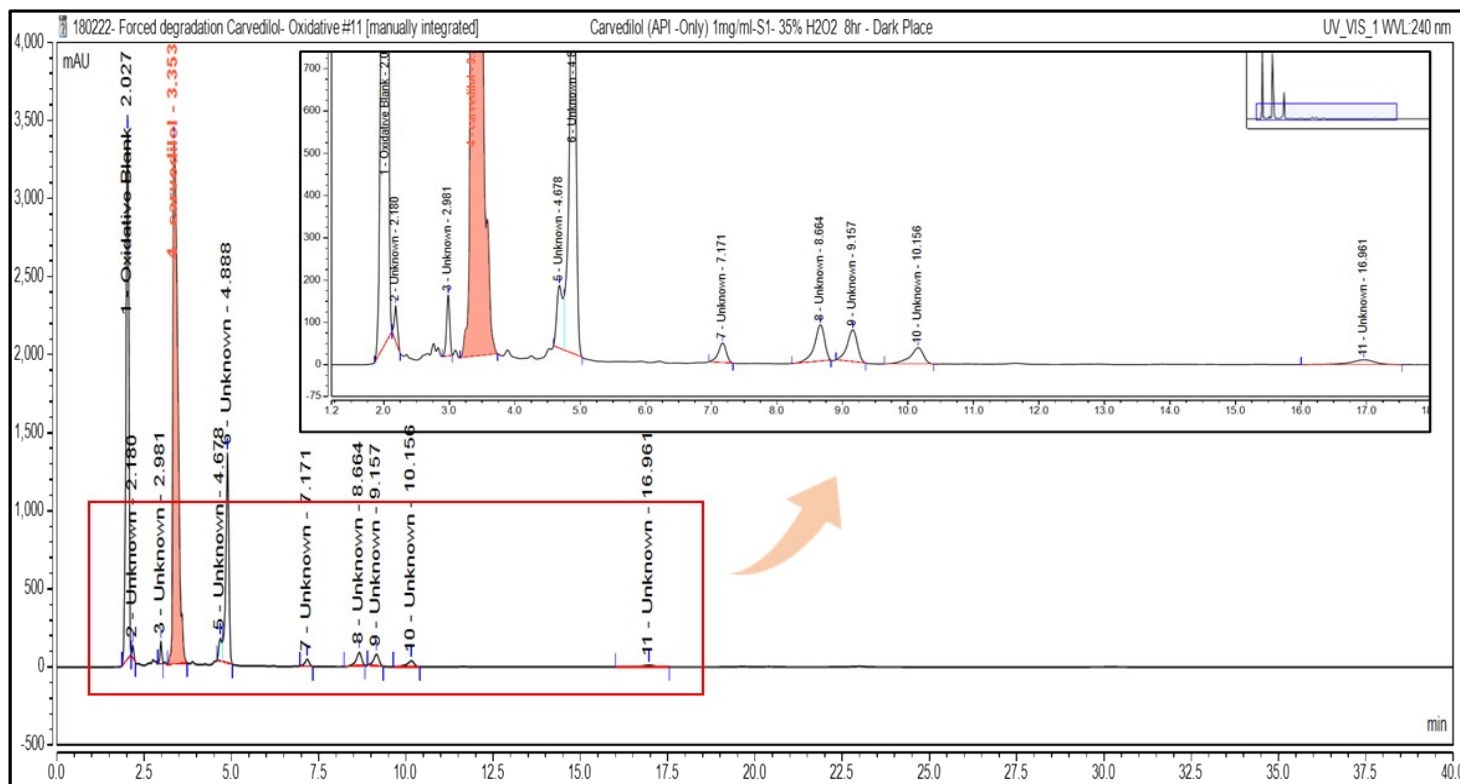

**Figure 119S.** HPLC chromatogram of oxidation degradation of CARV at 35.0% H<sub>2</sub>O<sub>2</sub> for 8 h.

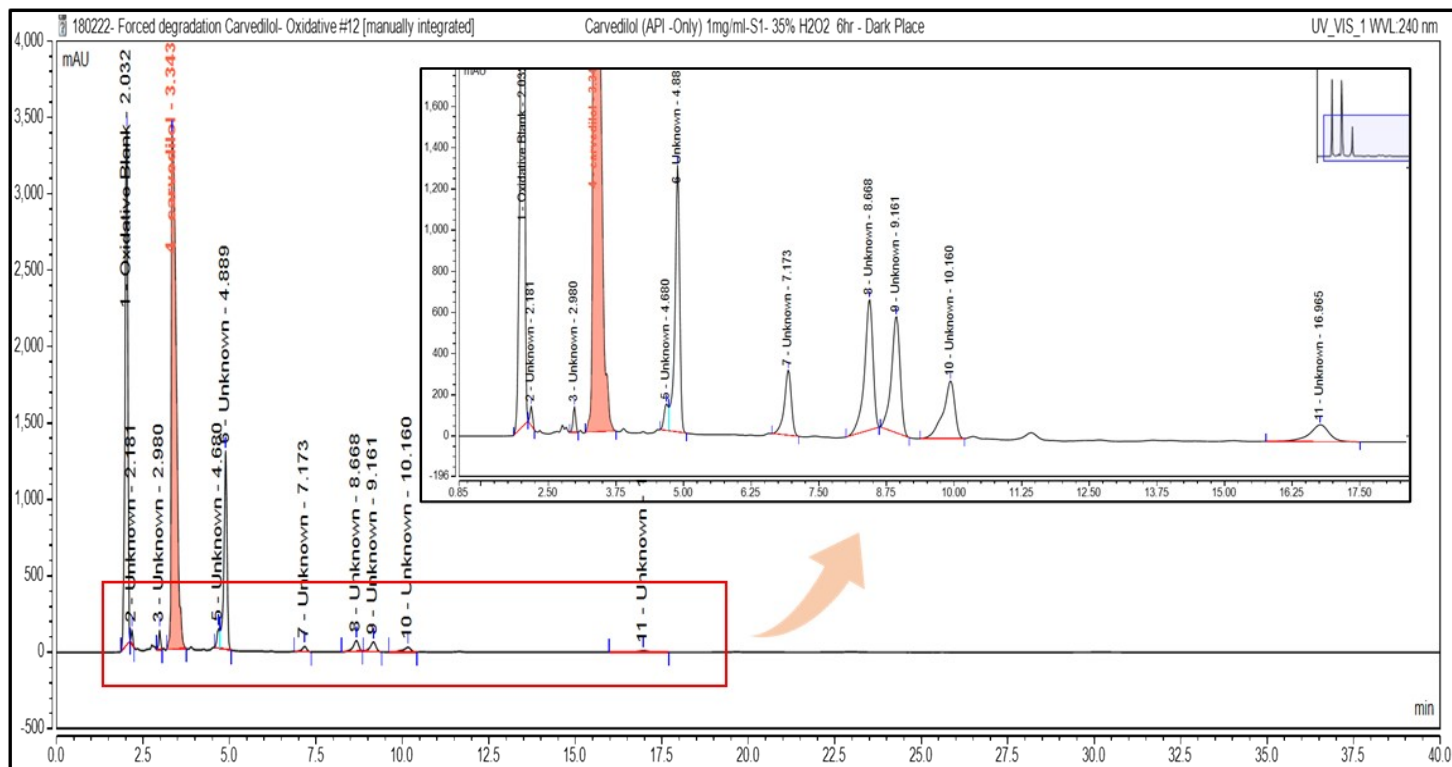

**Figure 120S.** HPLC chromatogram of oxidation degradation of CARV at 35.0% H<sub>2</sub>O<sub>2</sub> for 6 h.

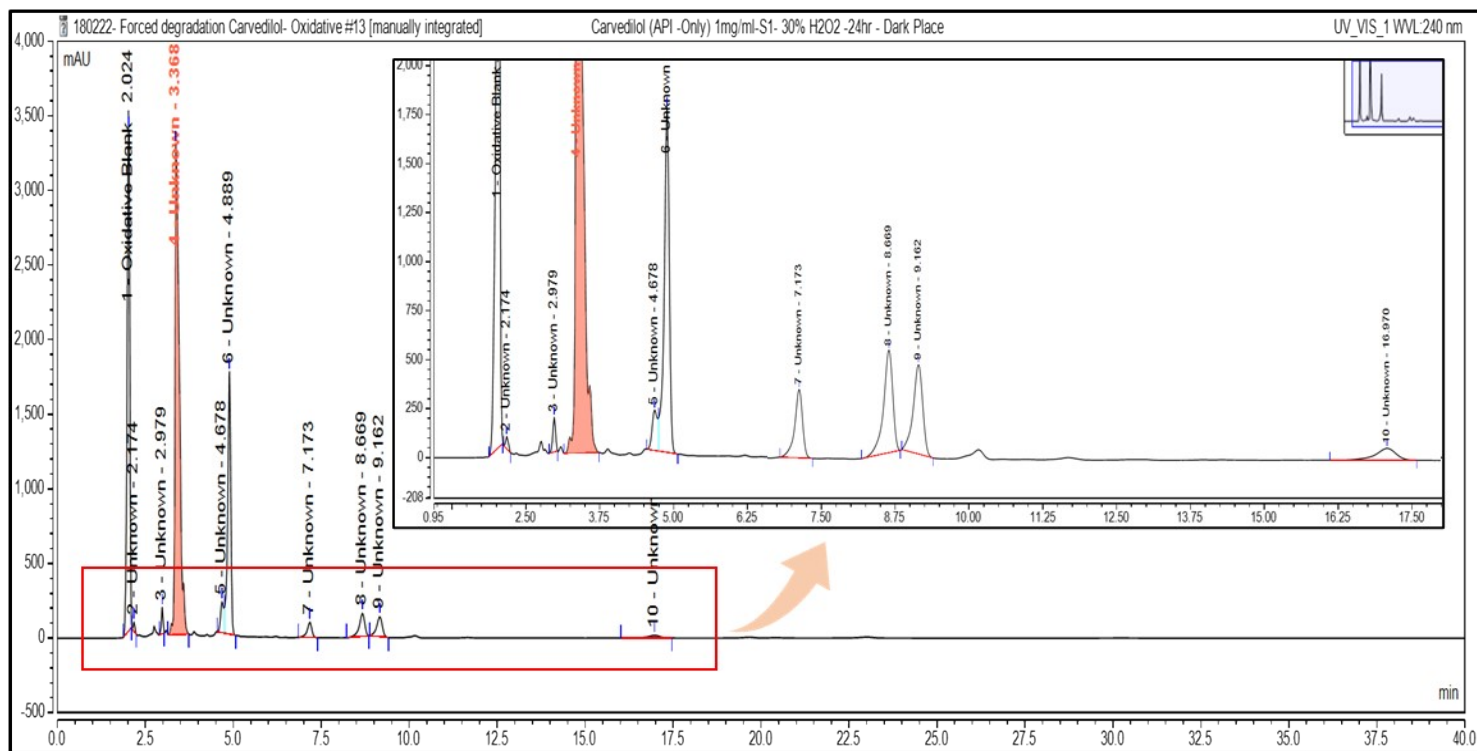

**Figure 121S.** HPLC chromatogram of oxidation degradation of CARV at 30.0% H<sub>2</sub>O<sub>2</sub> for 24 h.

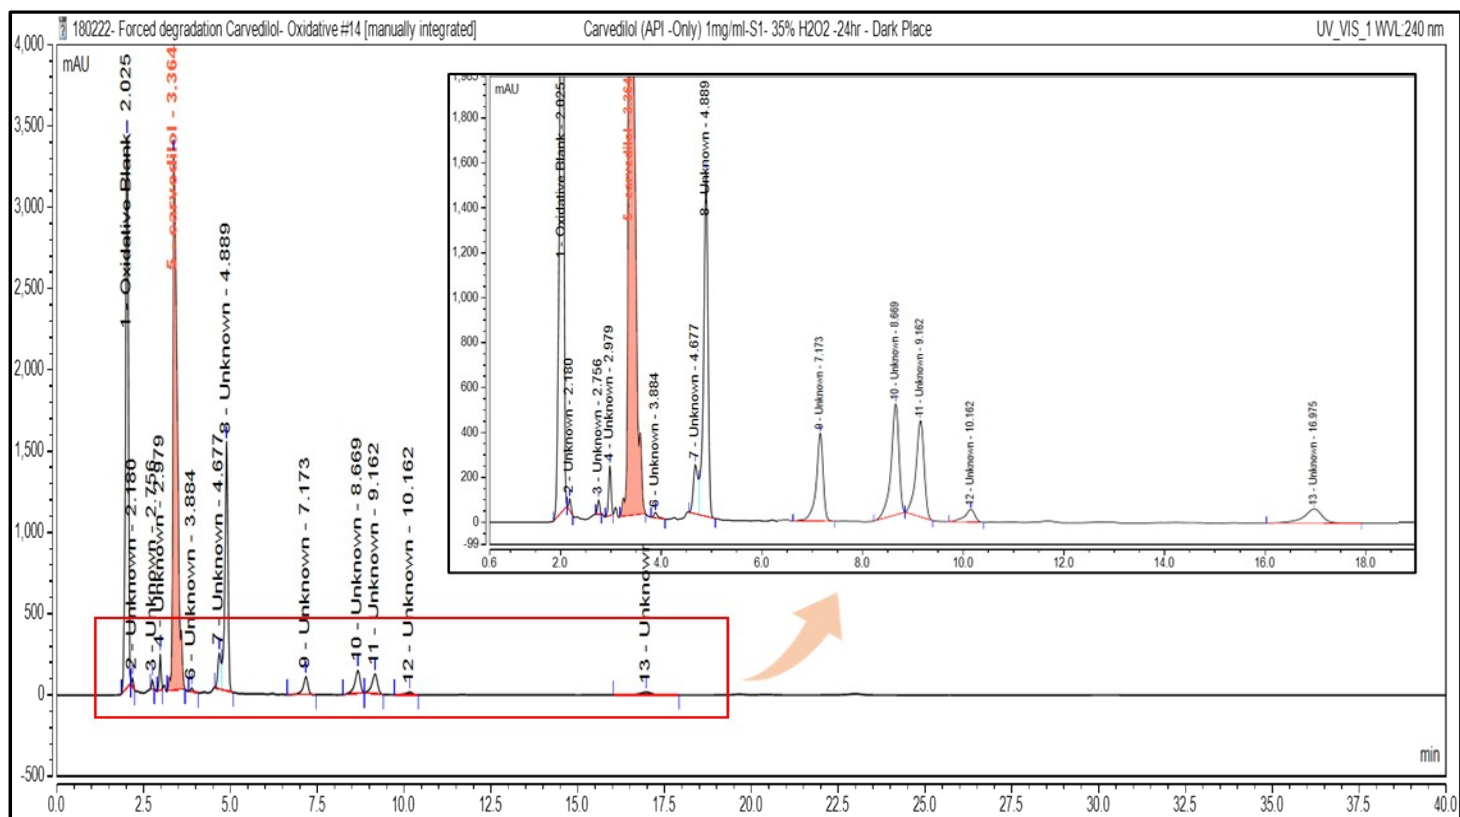

**Figure 122S.** HPLC chromatogram of oxidation degradation of CARV at 35.0% H<sub>2</sub>O<sub>2</sub> for 24 h.

## CARV-MEOG-Oxidation Degradation

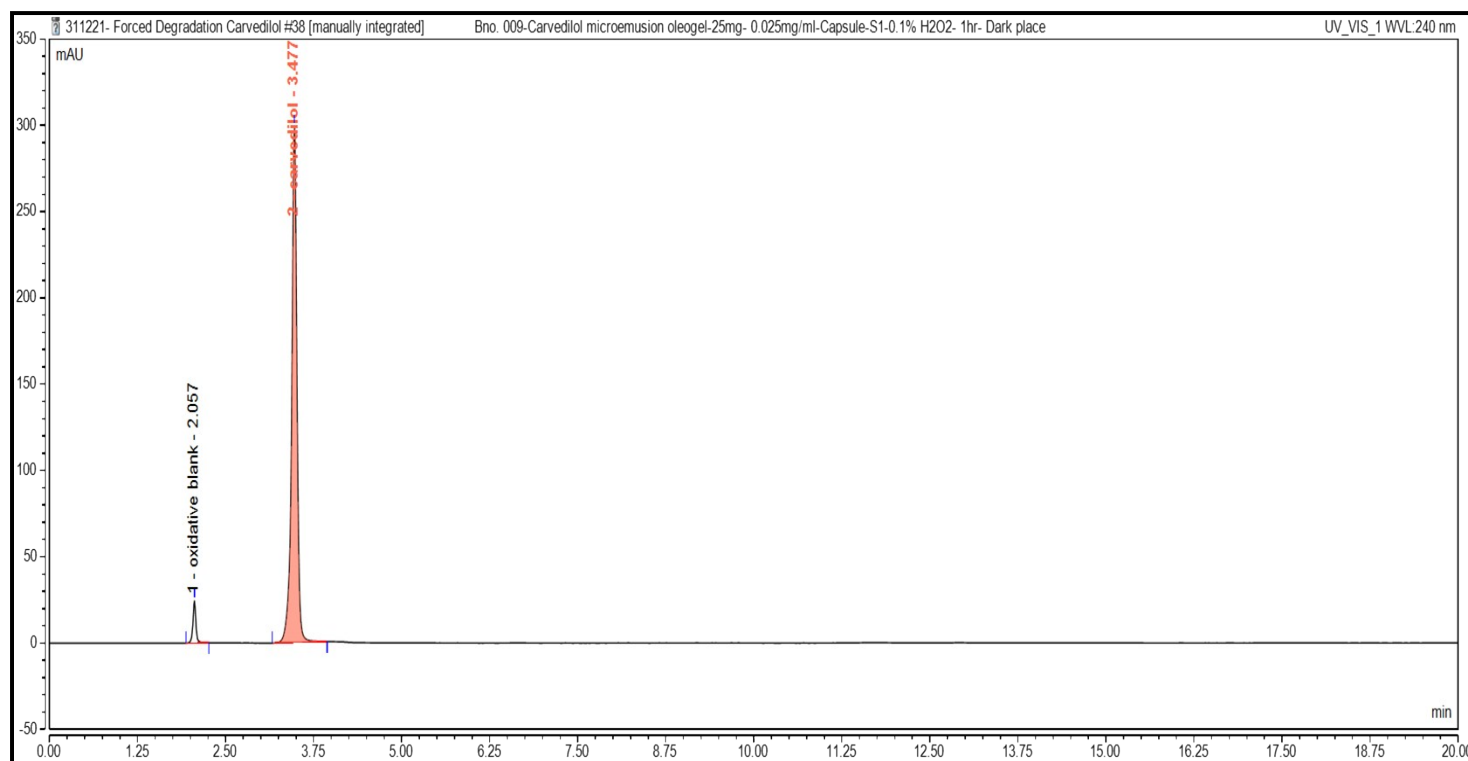

**Figure 123S.** HPLC chromatogram of oxidation degradation of CARV-MEOG at 0.1% H<sub>2</sub>O<sub>2</sub> for 1 h.

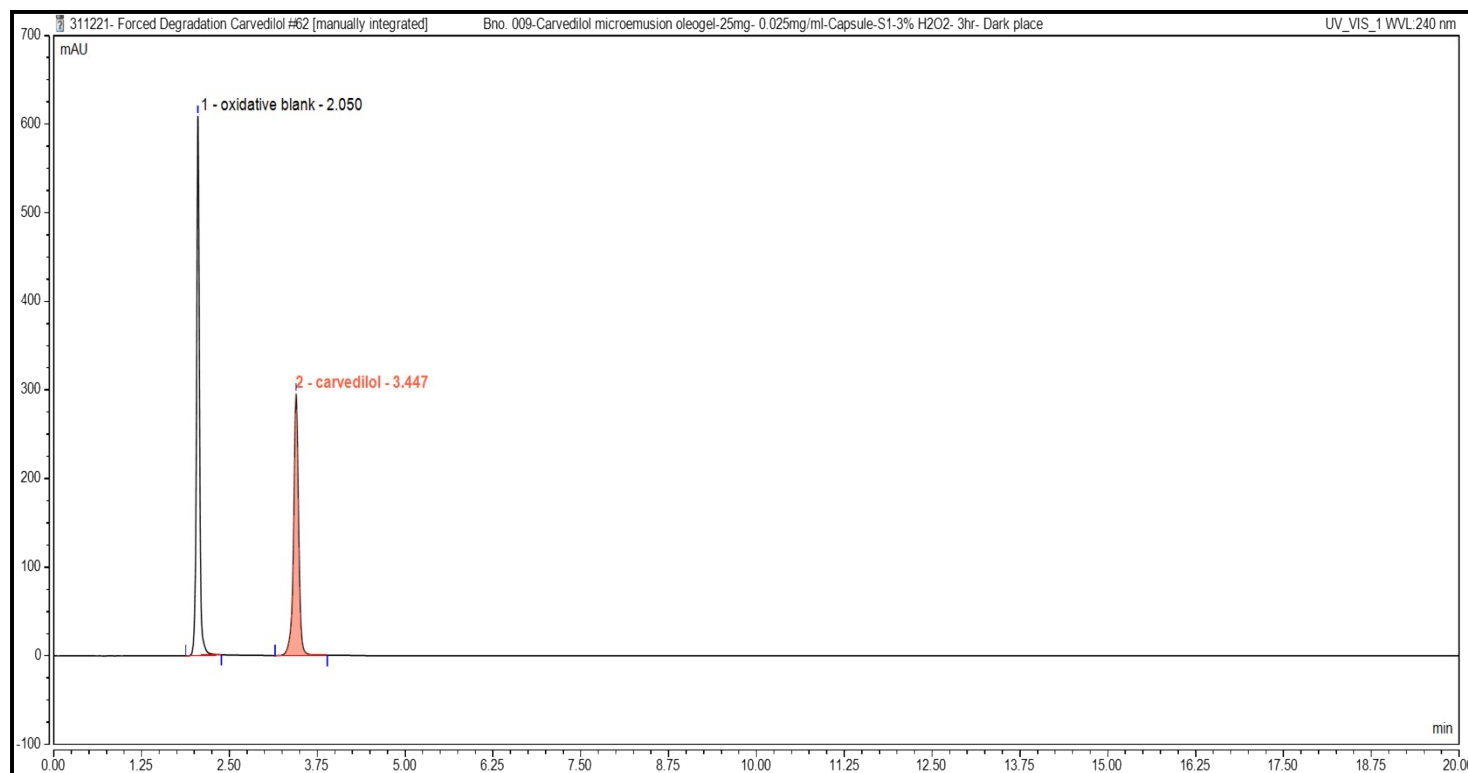

**Figure 124S.** HPLC chromatogram of oxidation degradation of CARV-MEOG at 3.0% H<sub>2</sub>O<sub>2</sub> for 3 h.

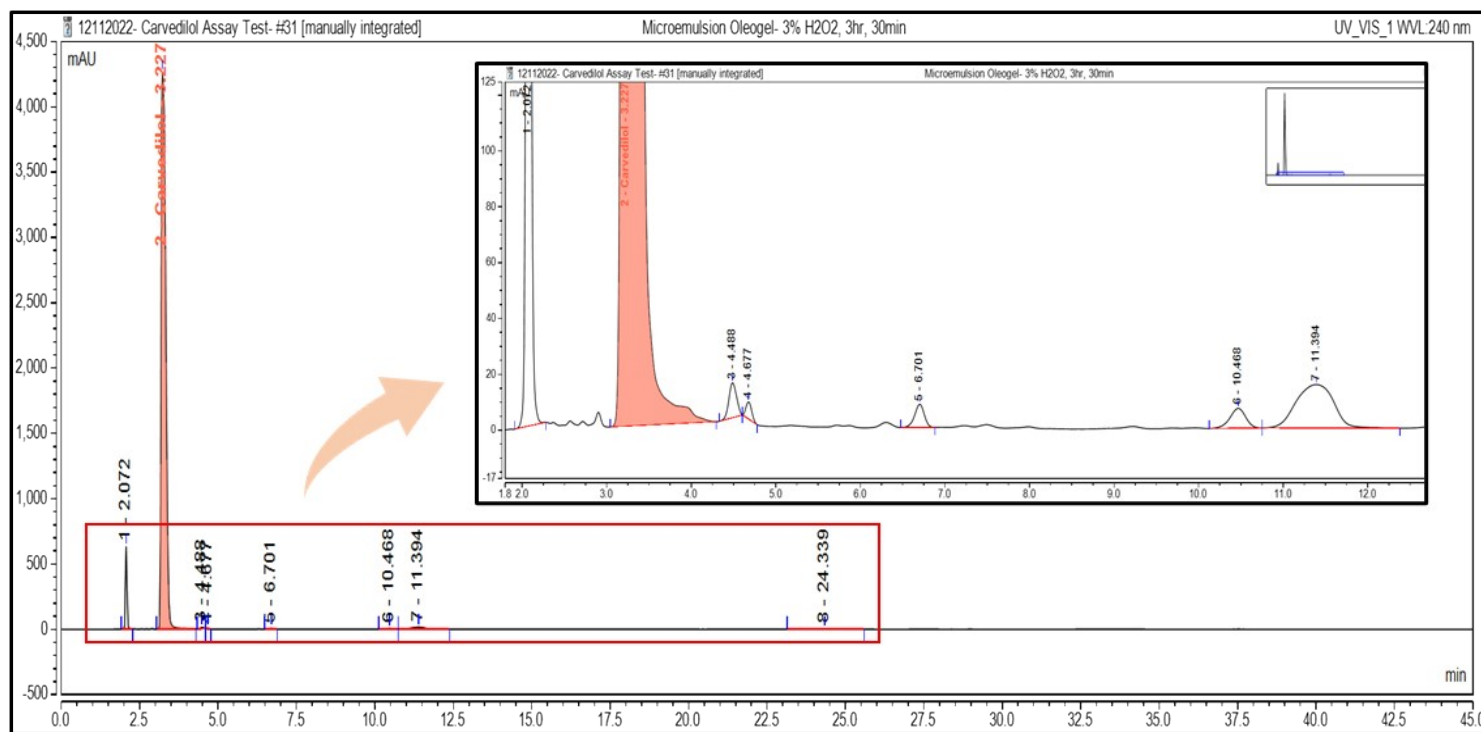

**Figure 125S.** HPLC chromatogram of oxidation degradation of CARV-MEOG at 3.0% H<sub>2</sub>O<sub>2</sub> for 3 h and 30min (210min).

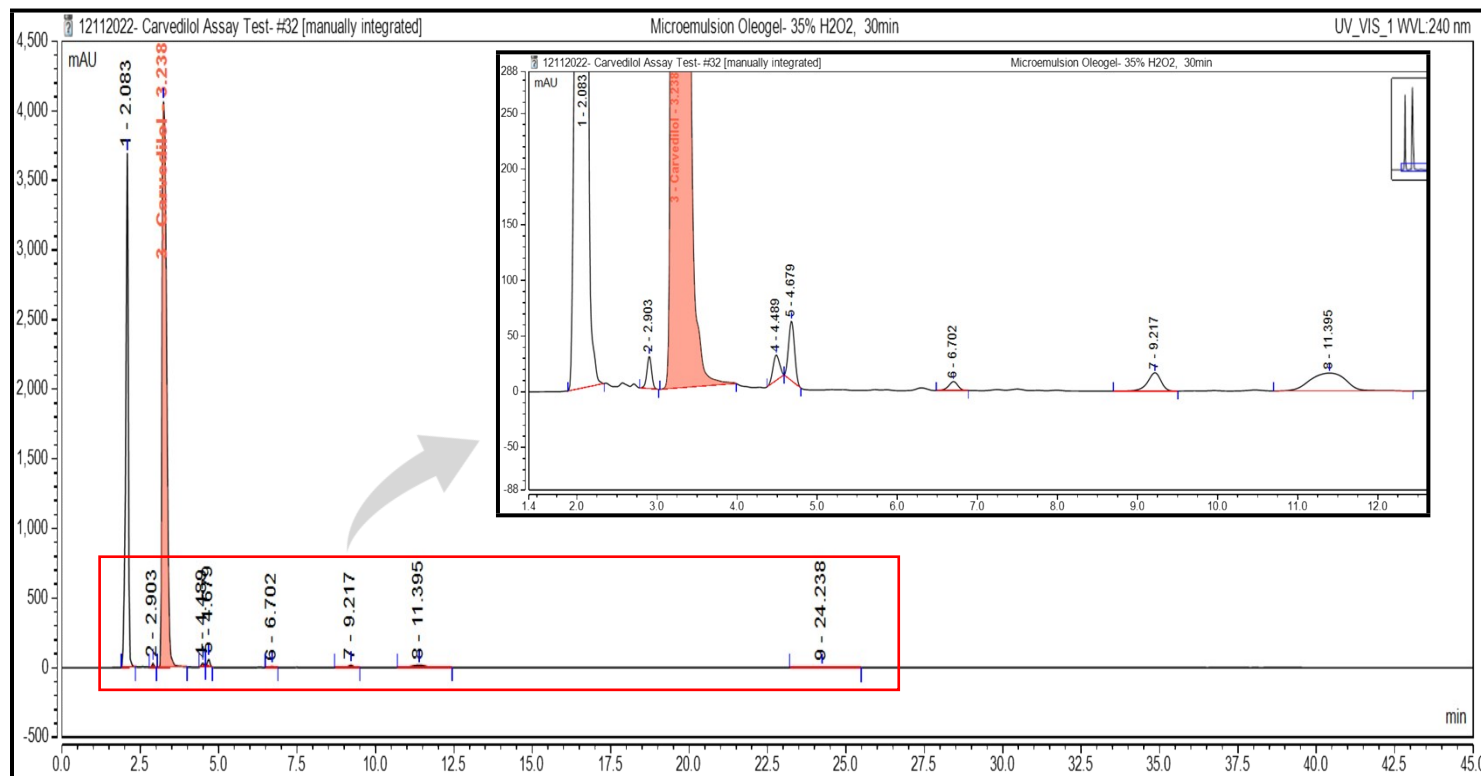

**Figure 126S.** HPLC chromatogram of oxidation degradation of CARV-MEOG at 35.0% H<sub>2</sub>O<sub>2</sub> for 30 min.



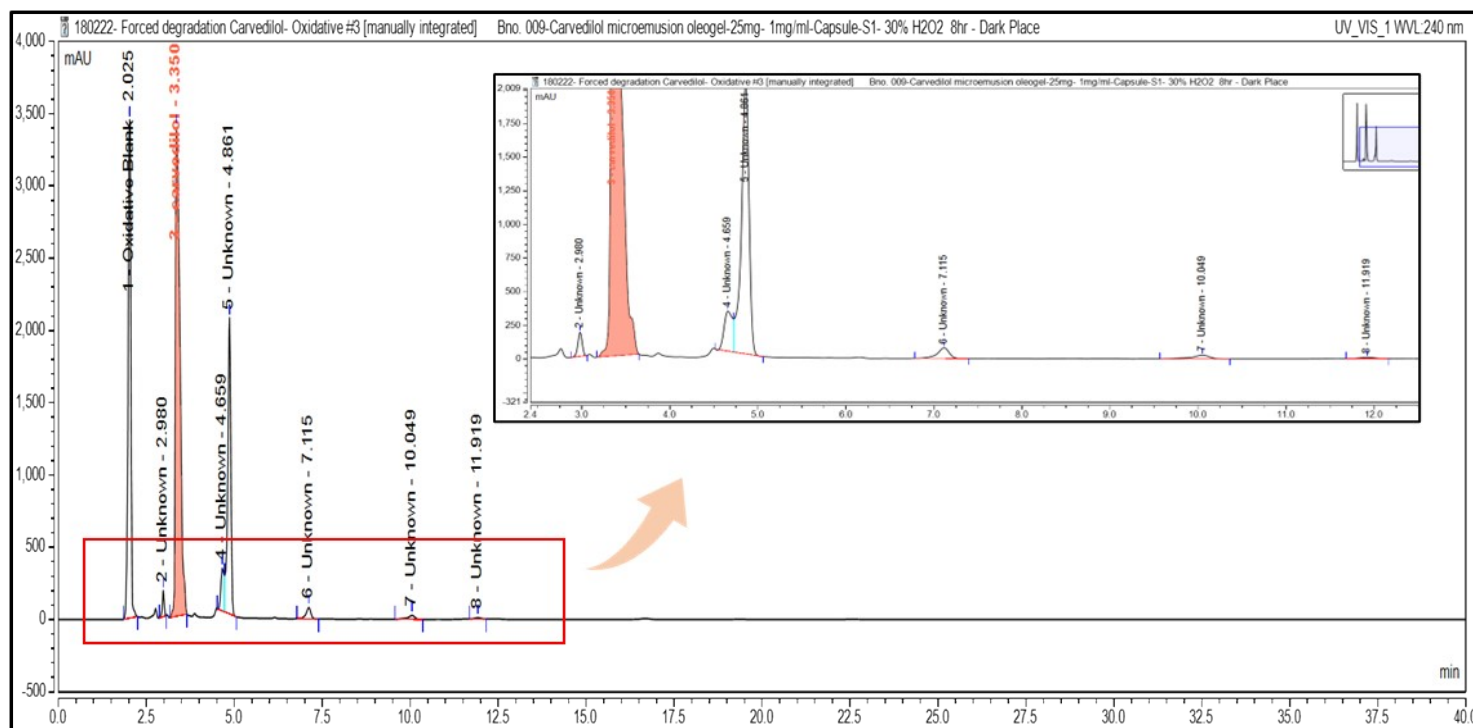

**Figure 127S.** HPLC chromatogram of oxidation degradation of CARV-MEOG at 30.0% H<sub>2</sub>O<sub>2</sub> for 8 h.

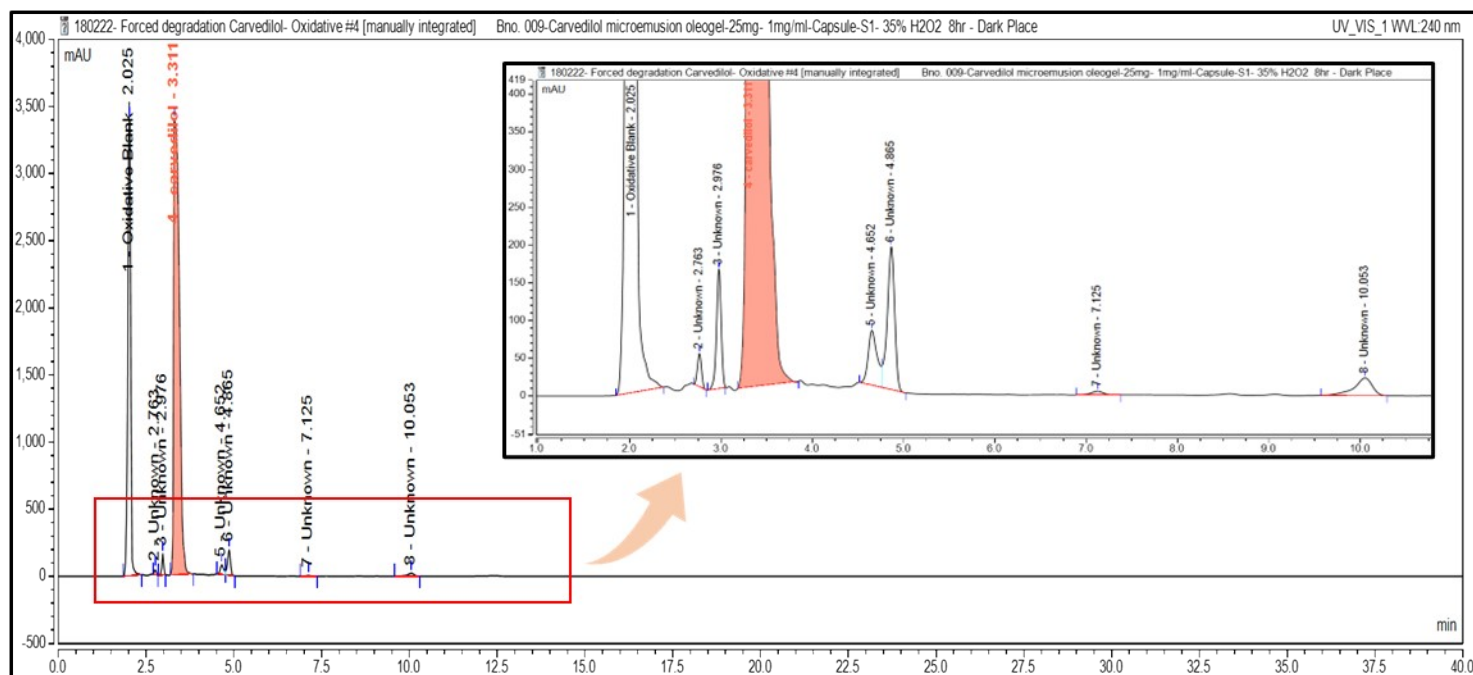

**Figure 128S.** HPLC chromatogram of oxidation degradation of CARV-MEOG at 35.0% H<sub>2</sub>O<sub>2</sub> for 8 h.

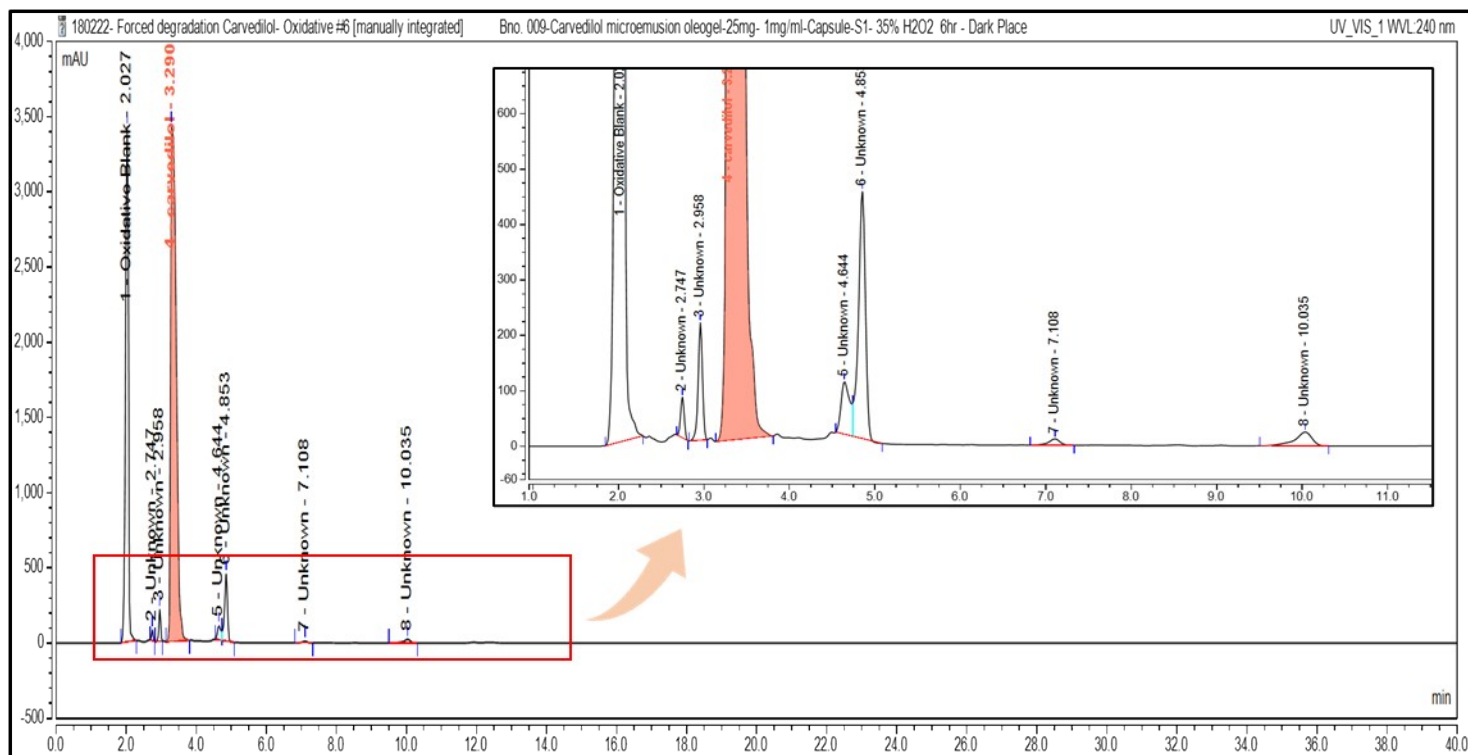

**Figure 129S.** HPLC chromatogram of oxidation degradation of CARV-MEOG at 35.0% H<sub>2</sub>O<sub>2</sub> for 6 h.

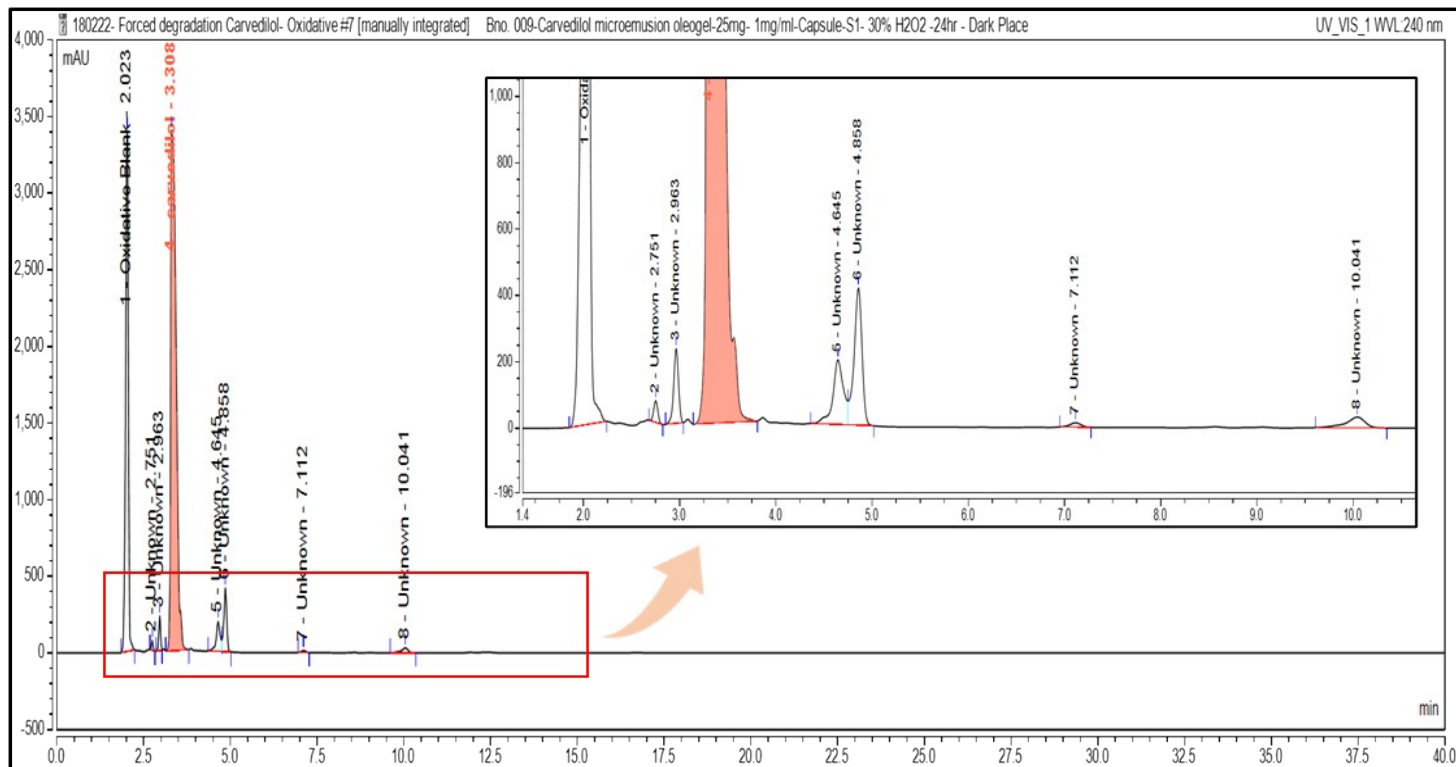

**Figure 130S.** HPLC chromatogram of oxidation degradation of CARV-MEOG at 30.0% H<sub>2</sub>O<sub>2</sub> for 24 h.

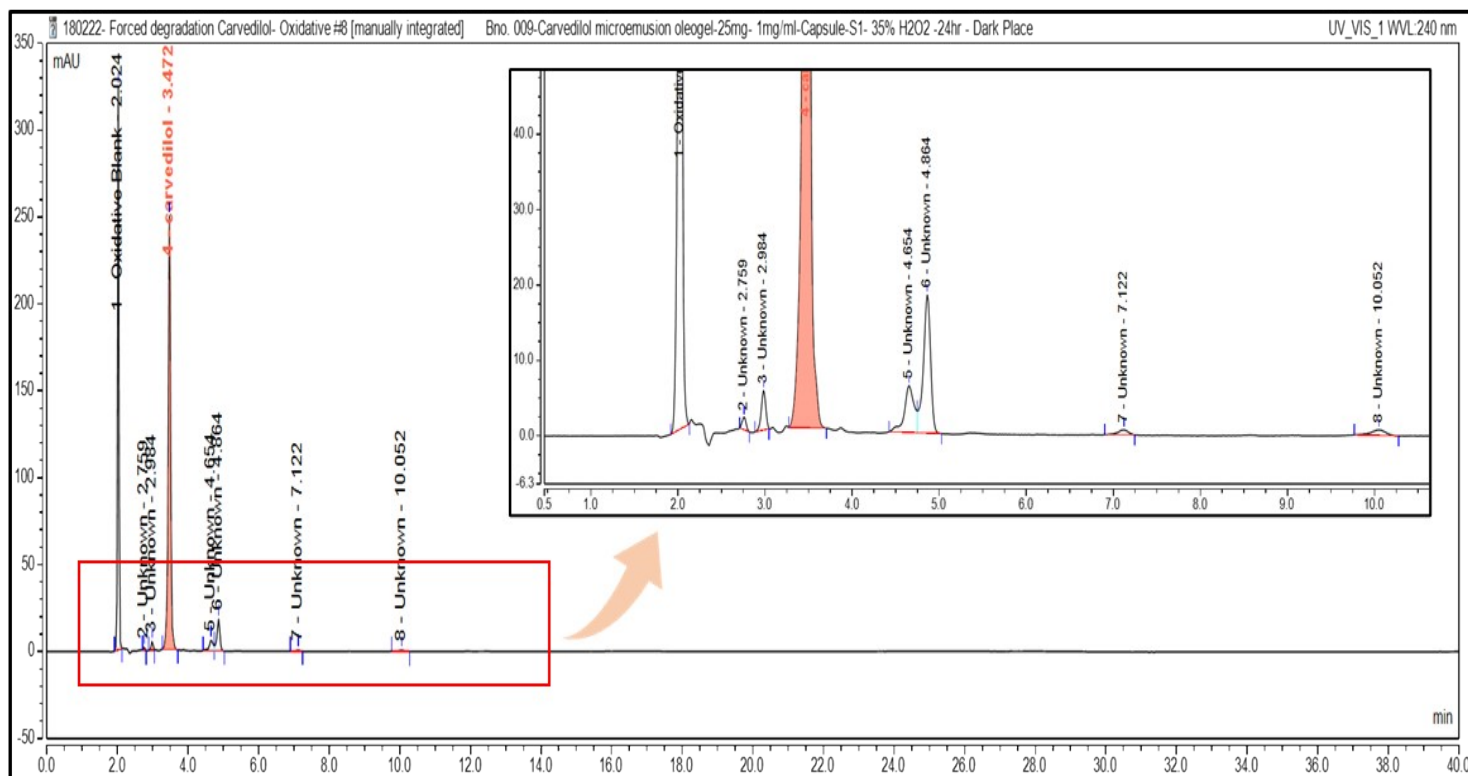

**Figure 131S.** HPLC chromatogram of oxidation degradation of CARV-MEOG at 35.0% H<sub>2</sub>O<sub>2</sub> for 24 h.

### Excipient- Microemulsion Loaded Oleogel-Oxidation Degradation

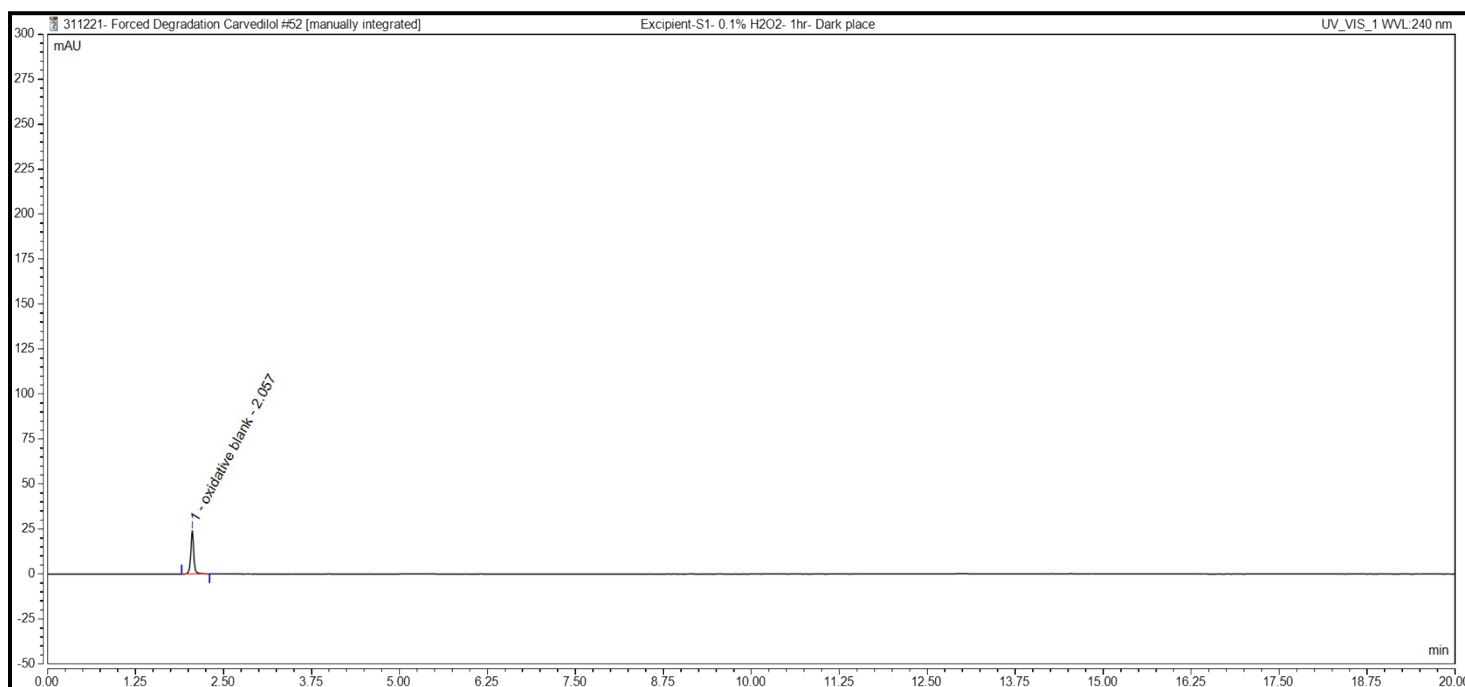

**Figure 132S.** HPLC chromatogram of oxidation degradation of excipients at 0.1% H<sub>2</sub>O<sub>2</sub> for 1 h.

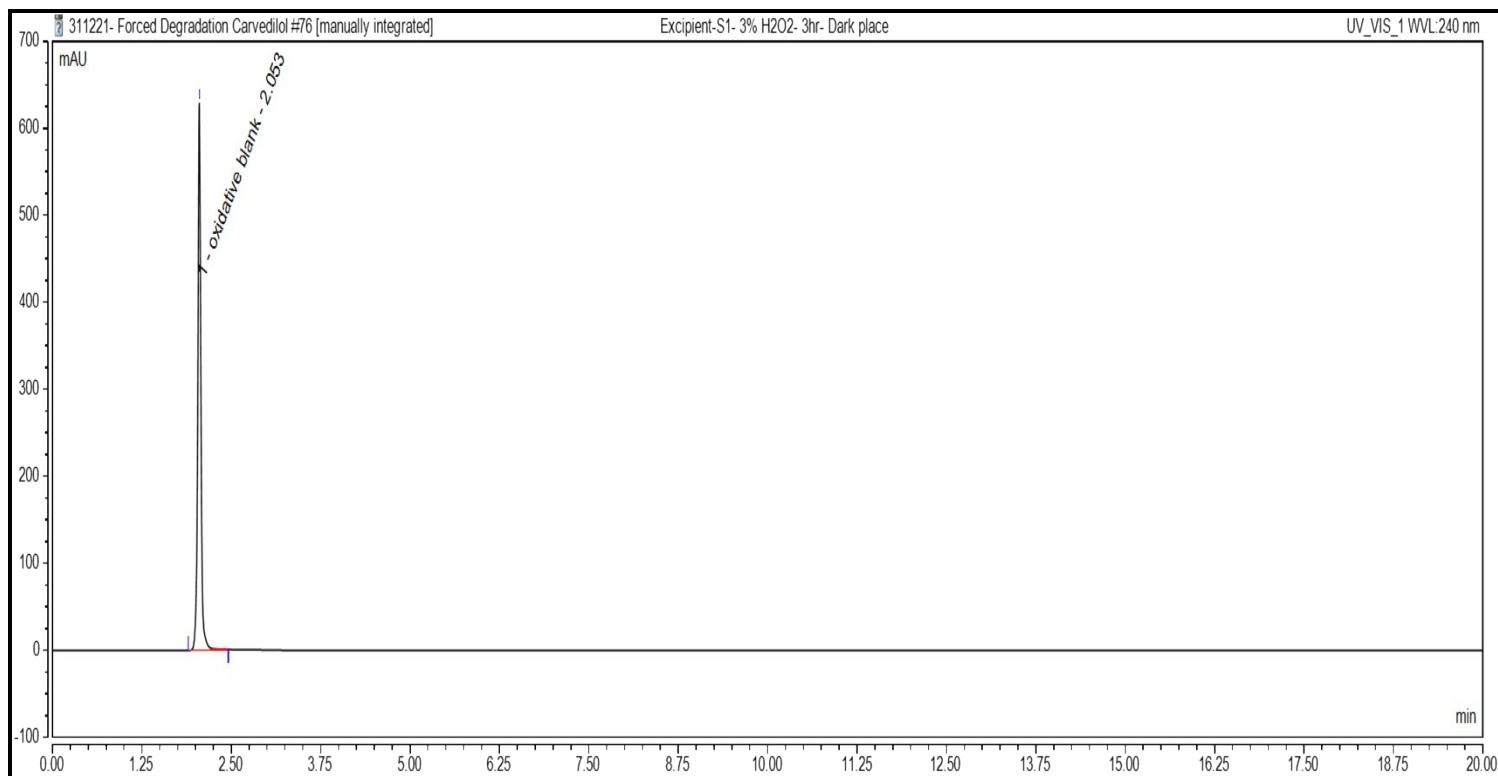

**Figure 133S.** HPLC chromatogram of oxidation degradation of excipients at 3.0% H<sub>2</sub>O<sub>2</sub> for 3 h.

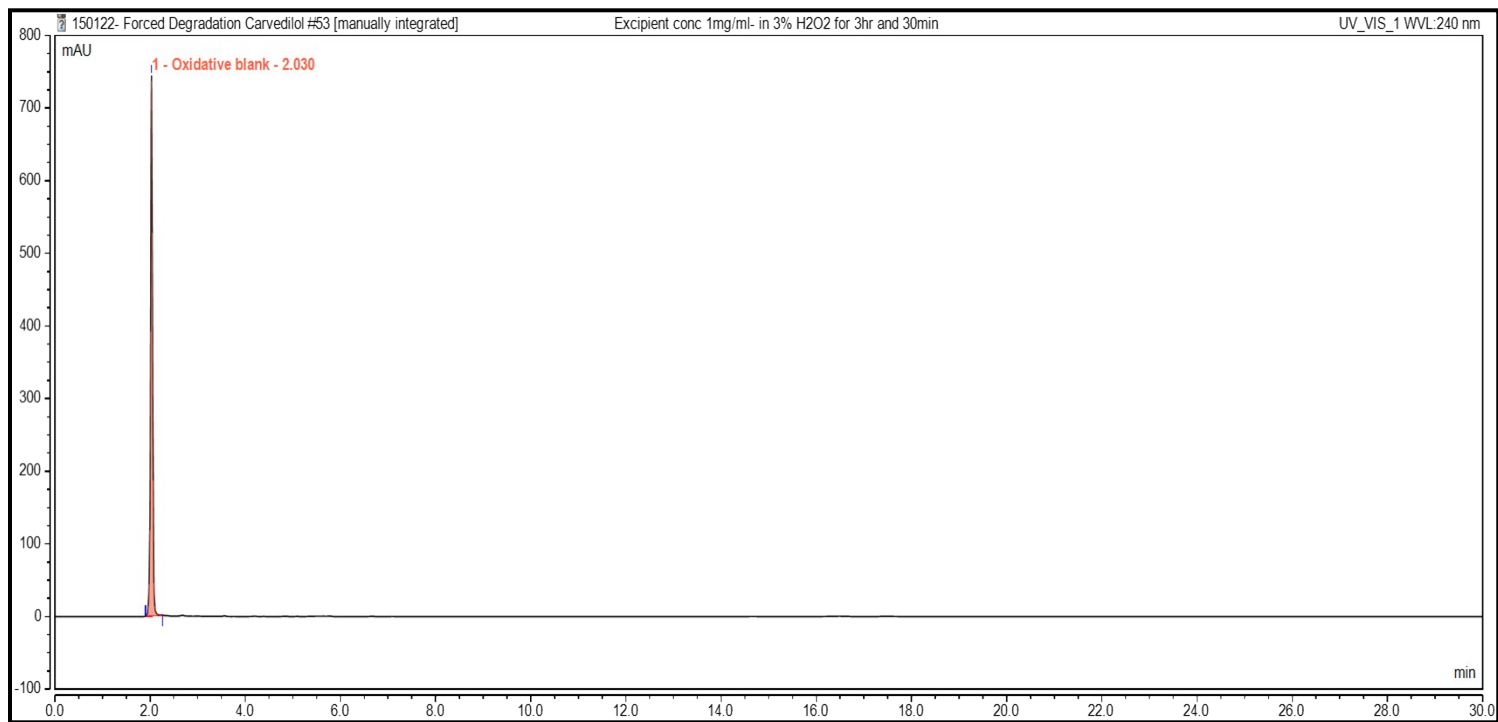

**Figure 134S.** HPLC chromatogram of oxidation degradation of excipients at 3.0% H<sub>2</sub>O<sub>2</sub> for 3 h and 30 min (210min).

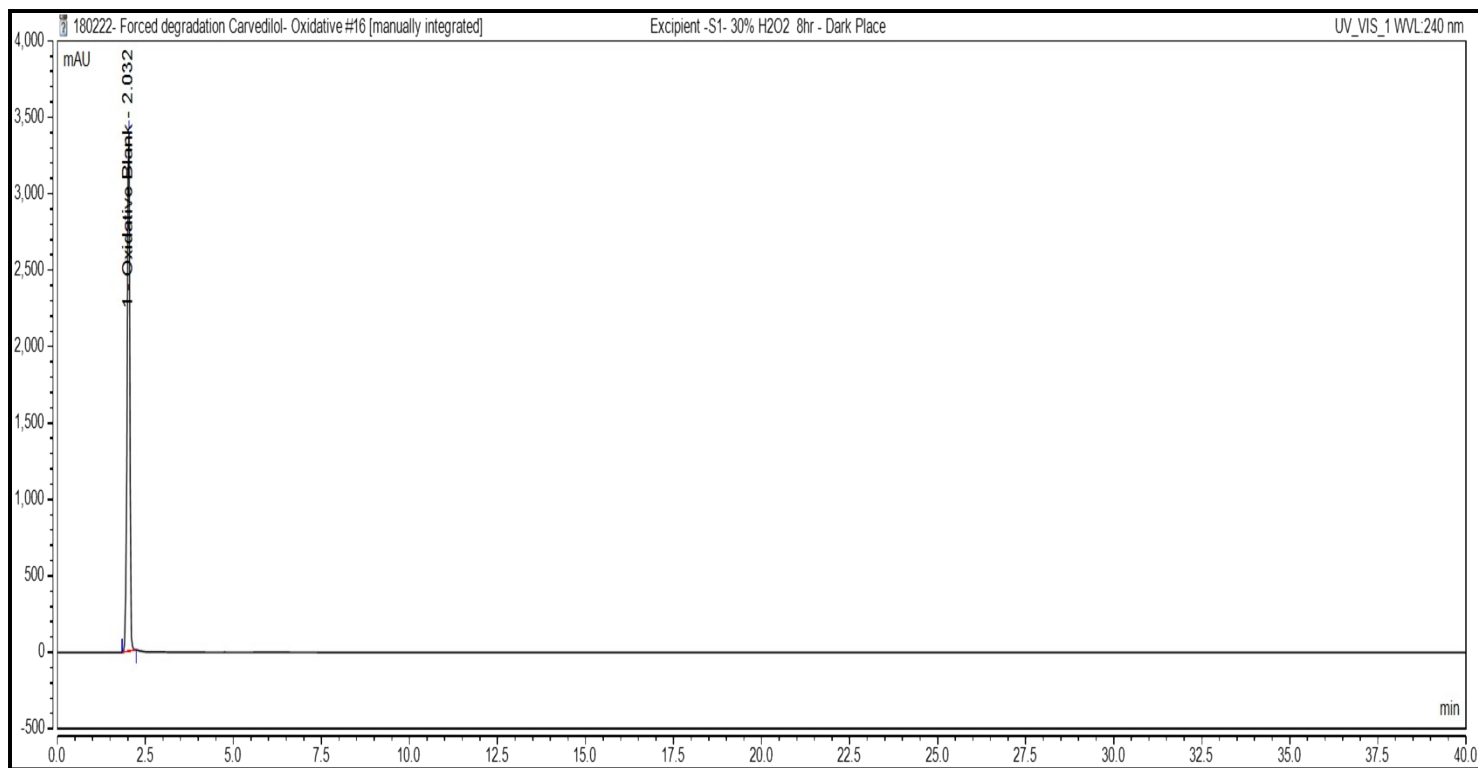

**Figure 135S.** HPLC chromatogram of oxidation degradation of excipients at 30.0% H<sub>2</sub>O<sub>2</sub> for 8 h.

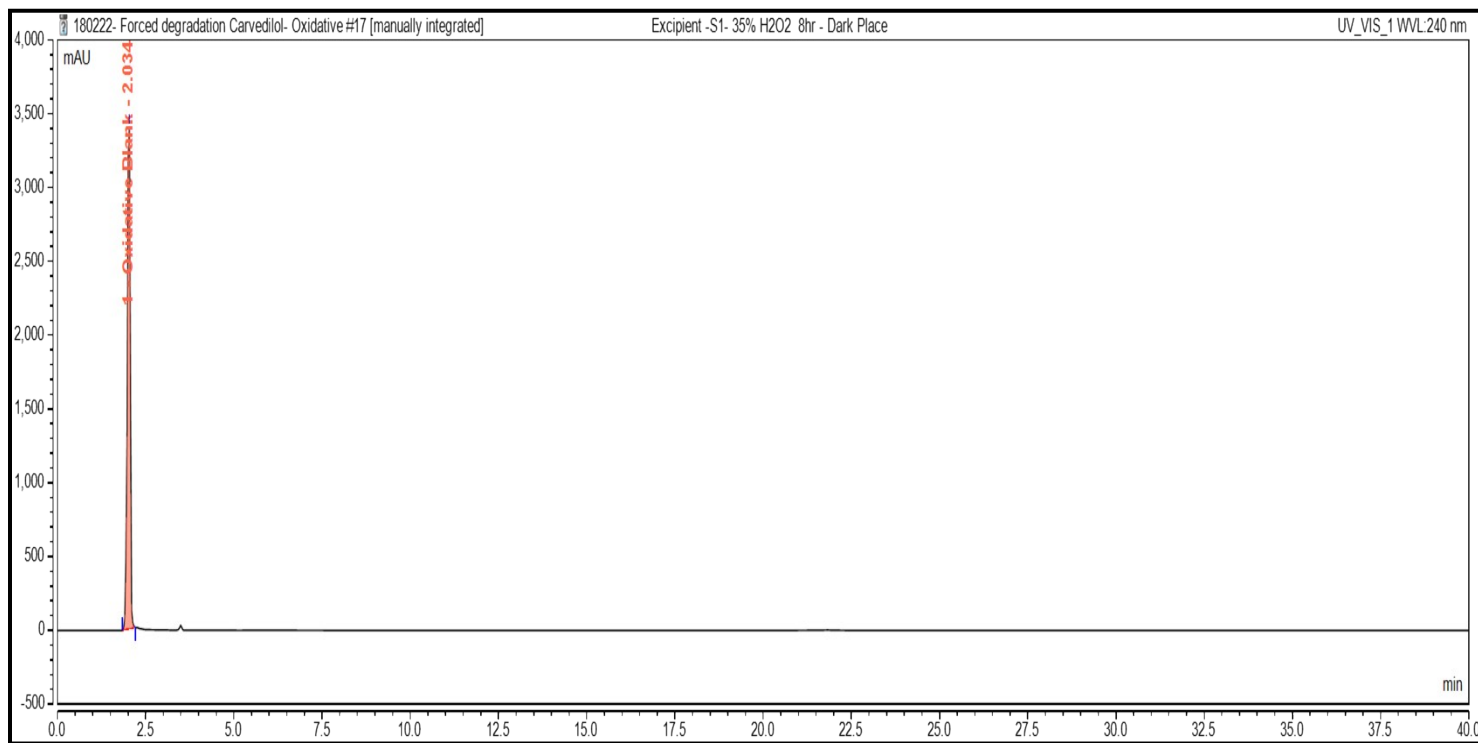

**Figure 136S.** HPLC chromatogram of oxidation degradation of excipients at 35.0% H<sub>2</sub>O<sub>2</sub> for 8 h.

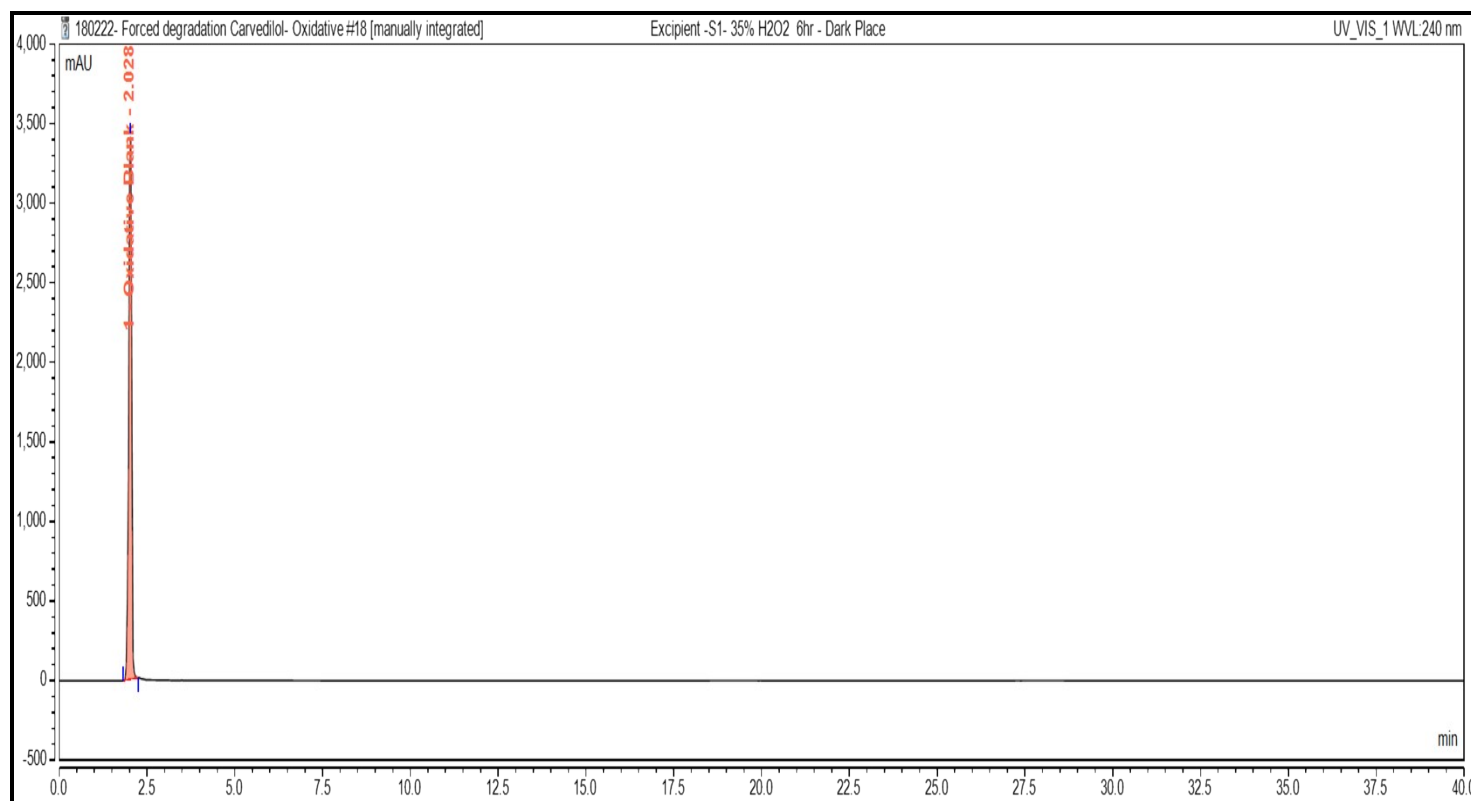

**Figure 137S.** HPLC chromatogram of oxidation degradation of excipients at 35.0% H<sub>2</sub>O<sub>2</sub> for 6 h.

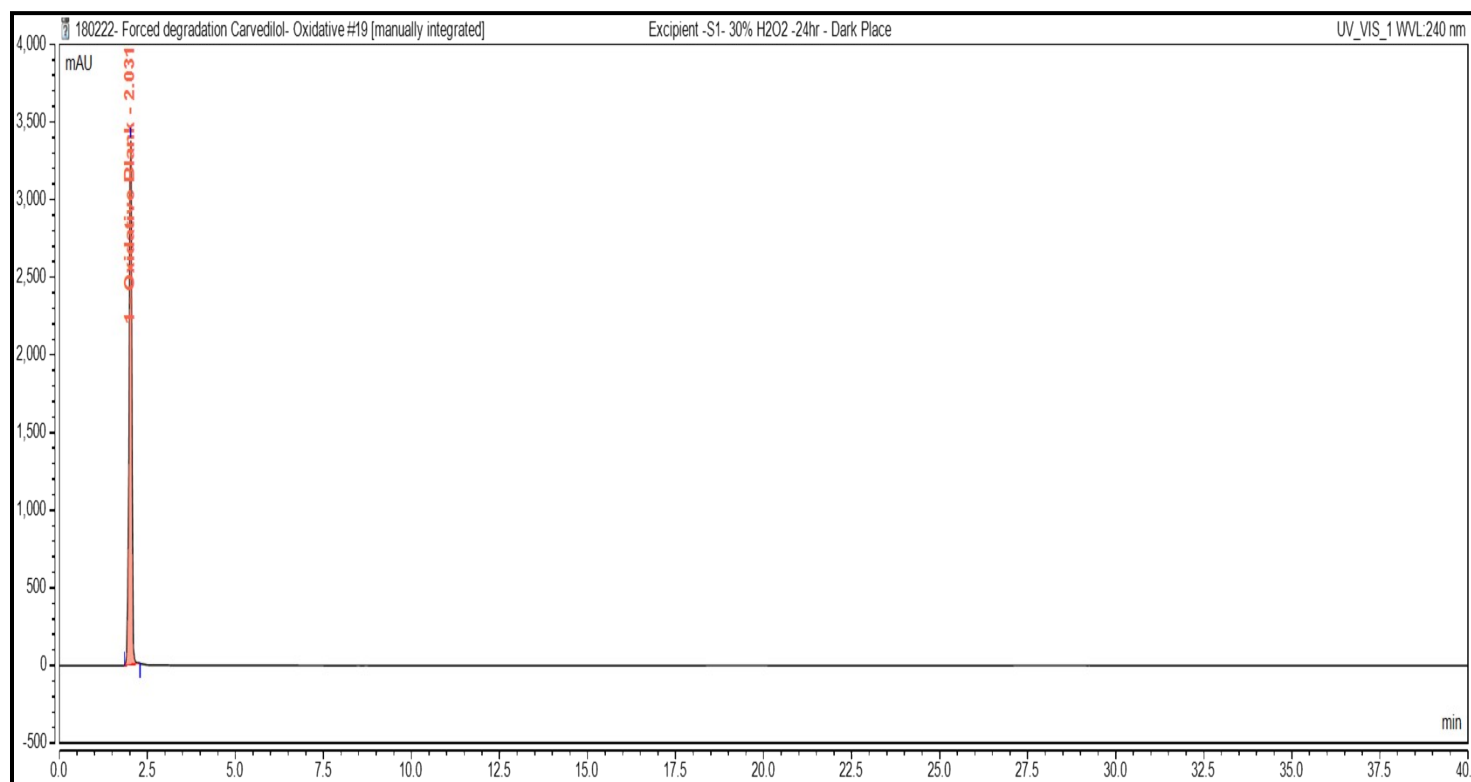

**Figure 138S.** HPLC chromatogram of oxidation degradation of excipients at 30.0% H<sub>2</sub>O<sub>2</sub> for 24 h.

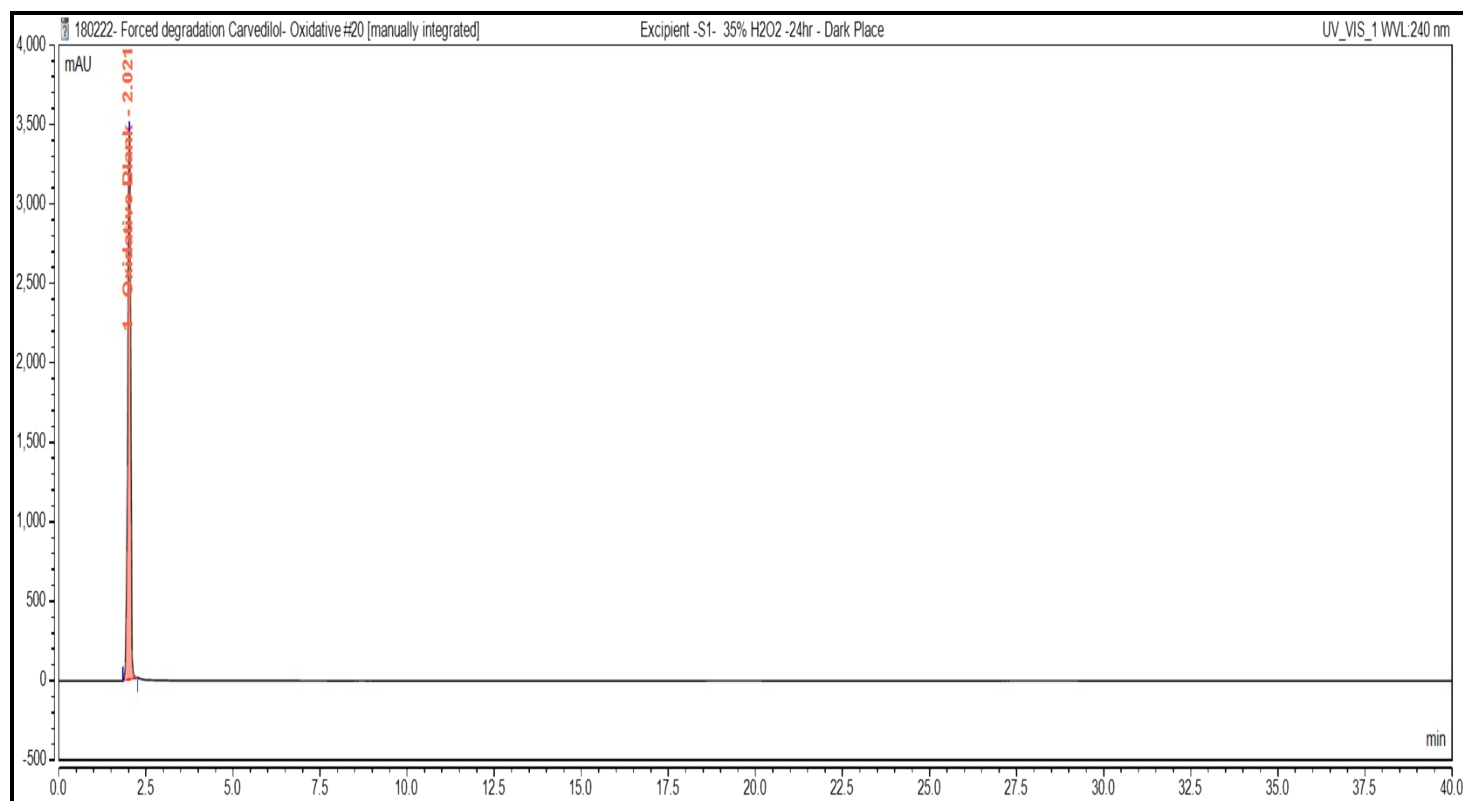

**Figure 139S.** HPLC chromatogram of oxidation degradation of excipients at 35.0% H<sub>2</sub>O<sub>2</sub> for 24 h.

## Thermal Degradation CARV:

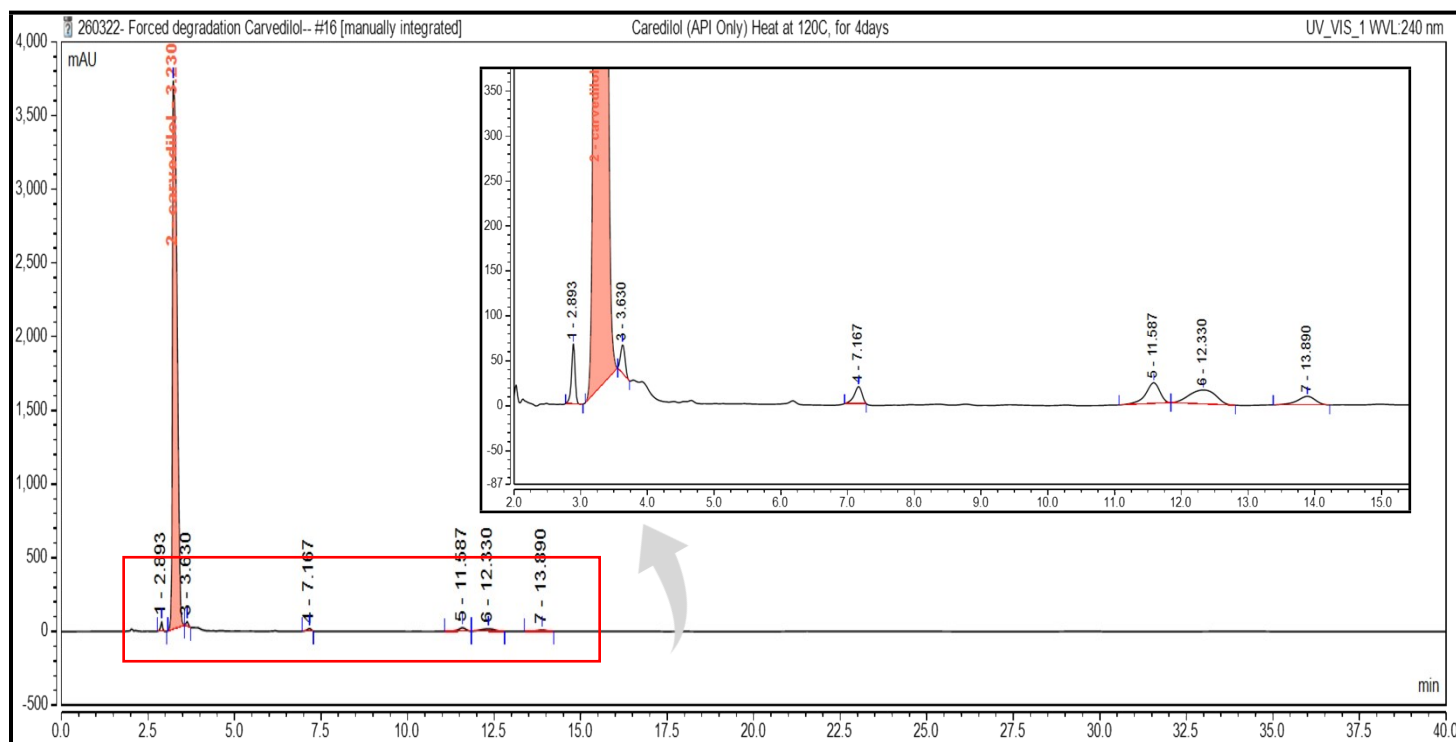

**Figure 140S.** HPLC chromatogram of thermal degradation of CARV at 120 °C for 4 days.

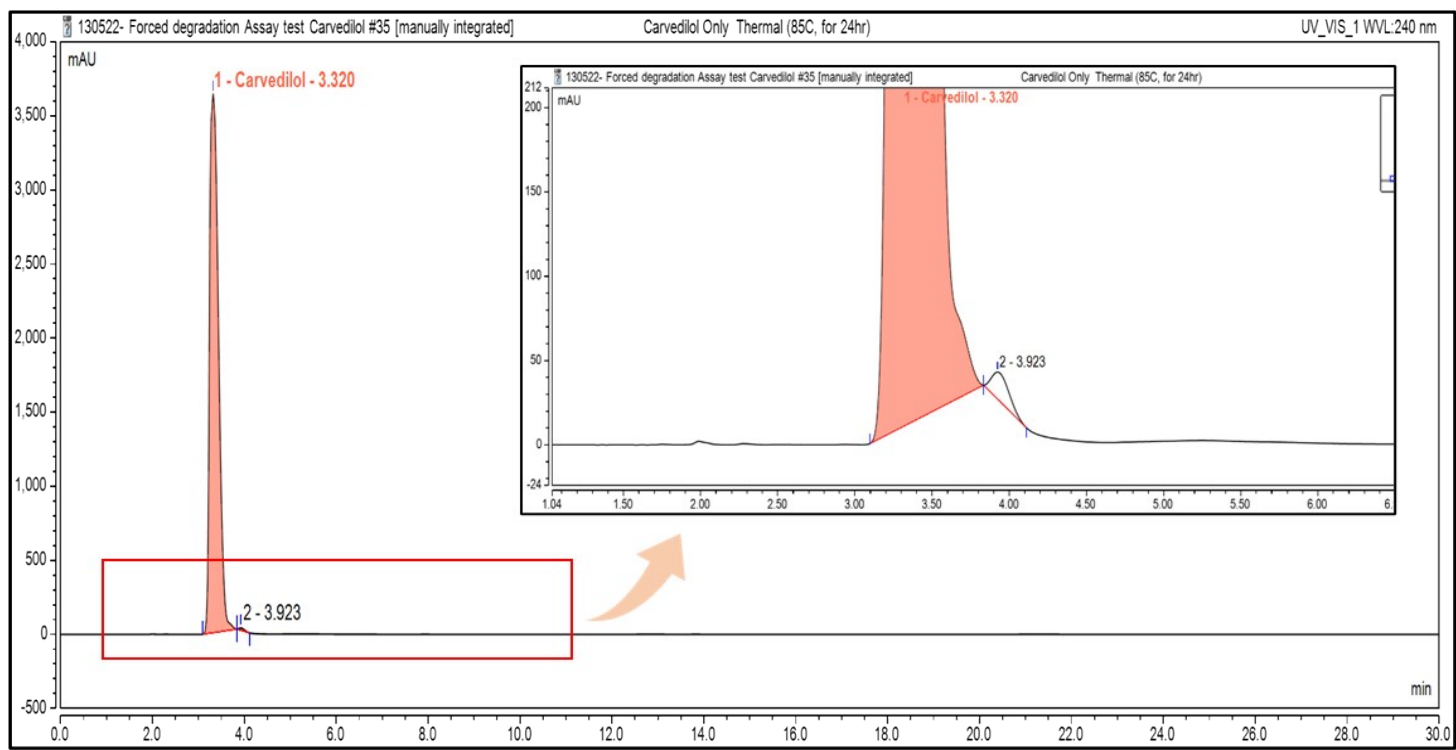

**Figure 141S.** HPLC chromatogram of thermal degradation of CARV at 85 °C for 24 h.



## CARV-MEOG- Thermal Degradation:

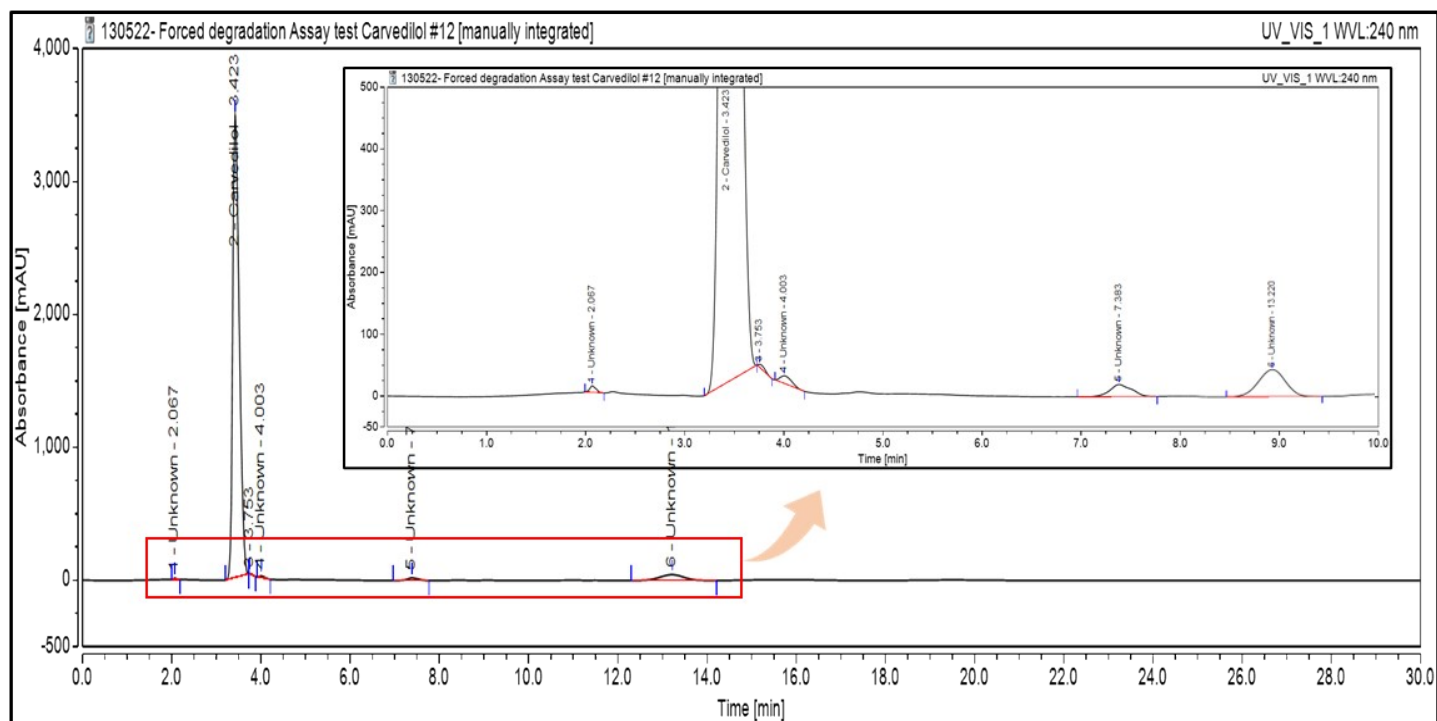

**Figure 142S.** HPLC chromatogram of thermal degradation of CARV-MEOG at 150 °C for 1 h.

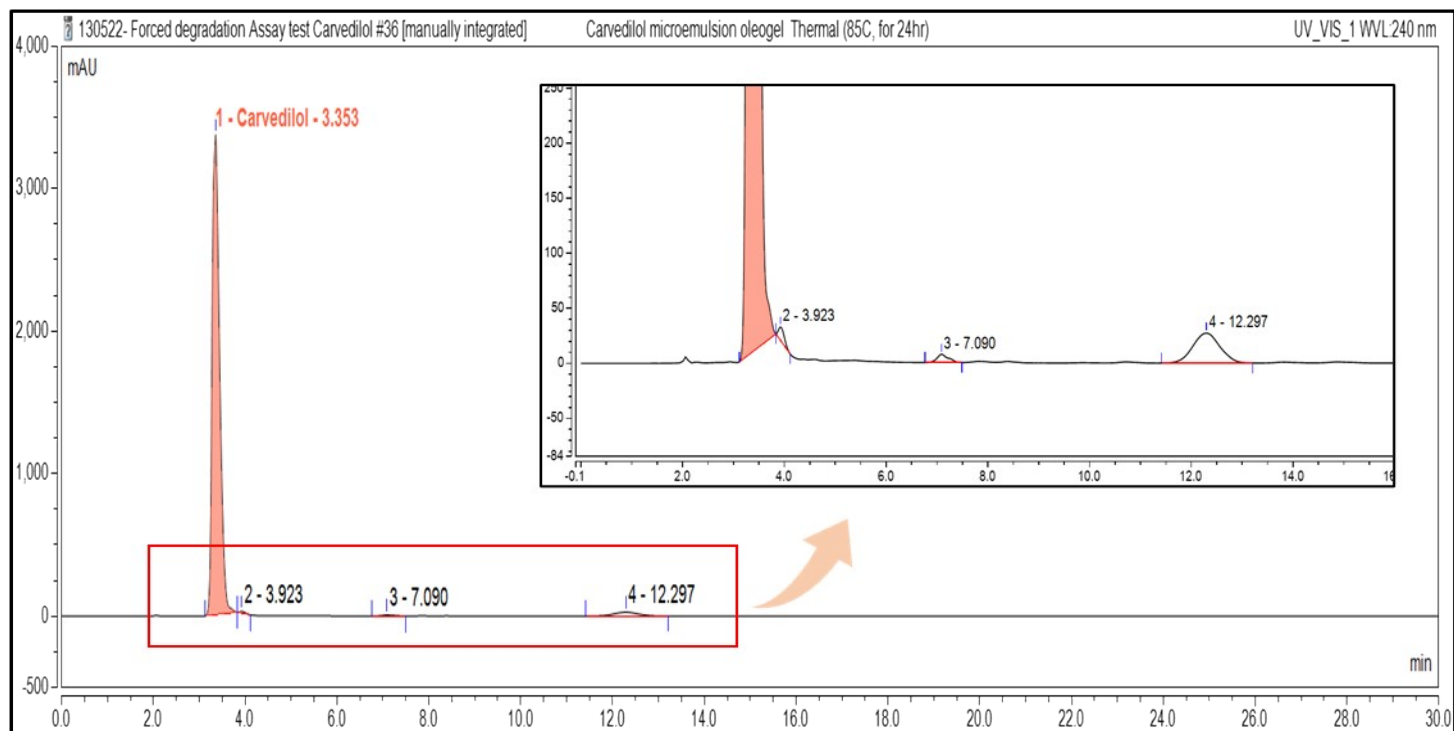

**Figure 143S.** HPLC chromatogram of thermal degradation of CARV-MEOG at 85 °C for 24 h.

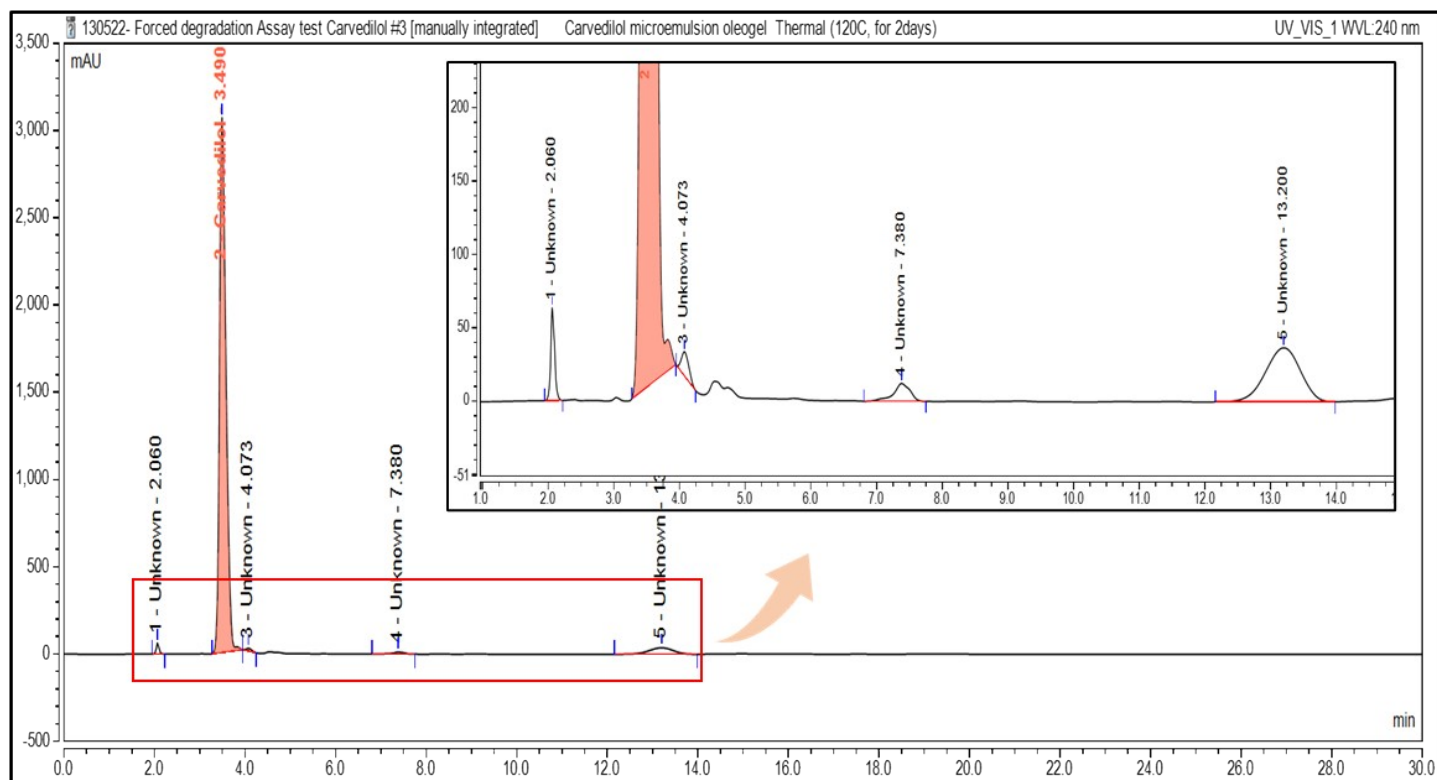

**Figure 144S.** HPLC chromatogram of thermal degradation of CARV-MEOG at 120 °C for 2 days.

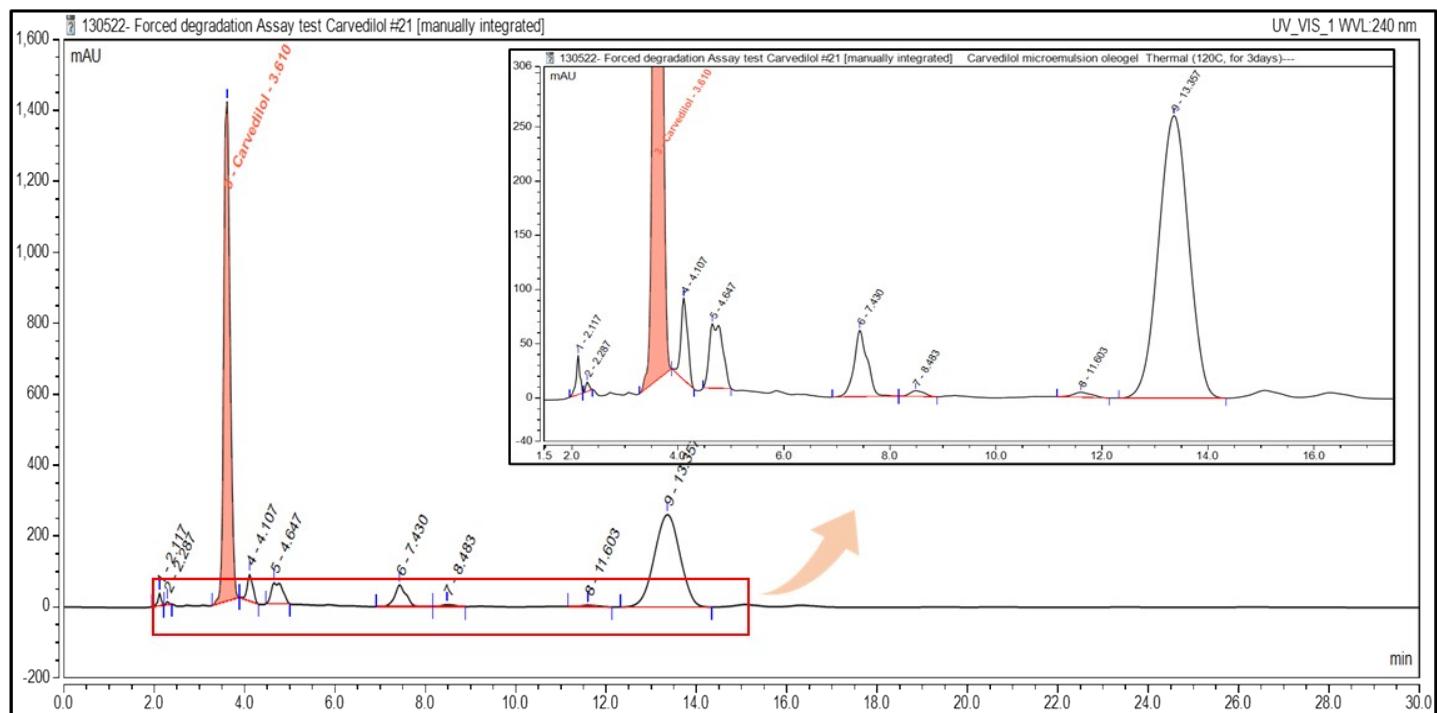

**Figure 145S.** HPLC chromatogram of thermal degradation of CARV-MEOG at 120 °C for 3 days.

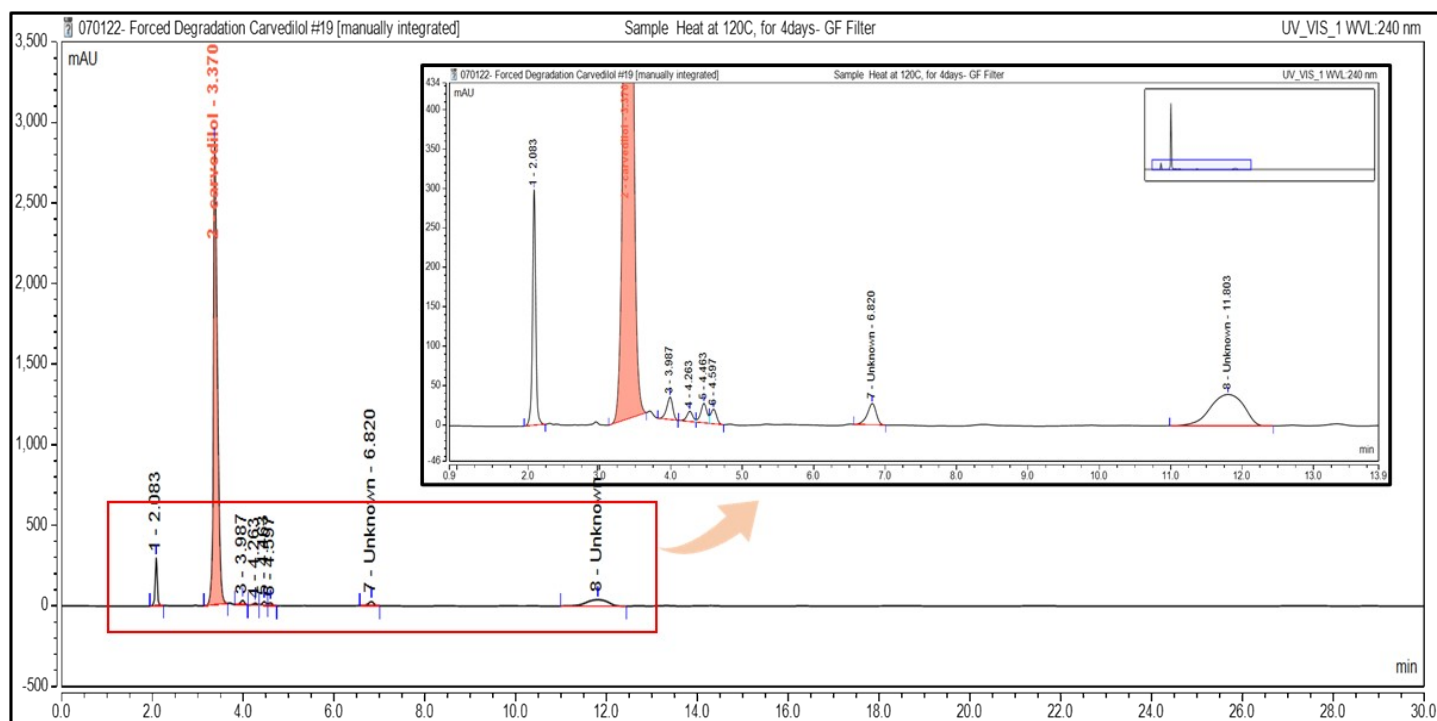

**Figure 146S.** HPLC chromatogram of thermal degradation of CARV-MEOG at 120 °C for 4 days.

### Excipient- Microemulsion Loaded Oleogel-Thermal Degradation:

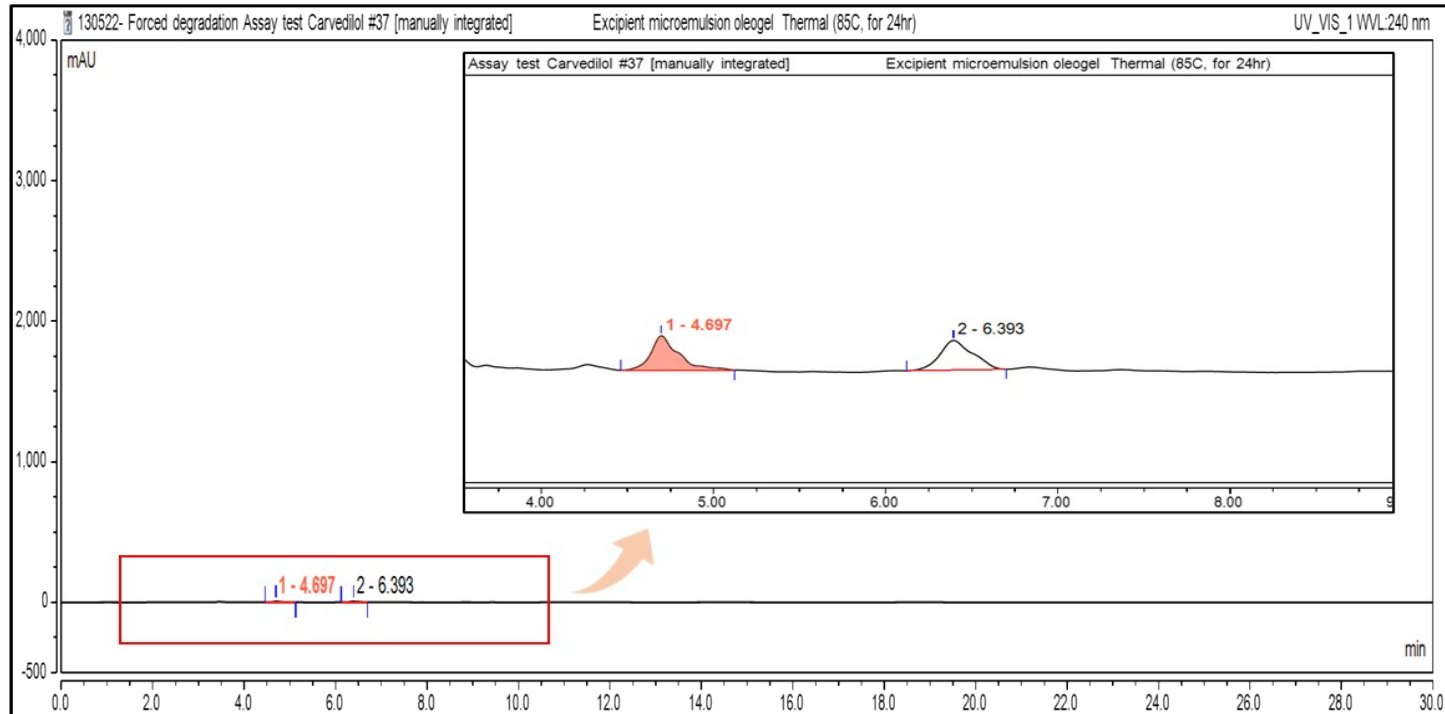

**Figure 147S.** HPLC chromatogram of thermal degradation of excipients at 85 °C 24 h.

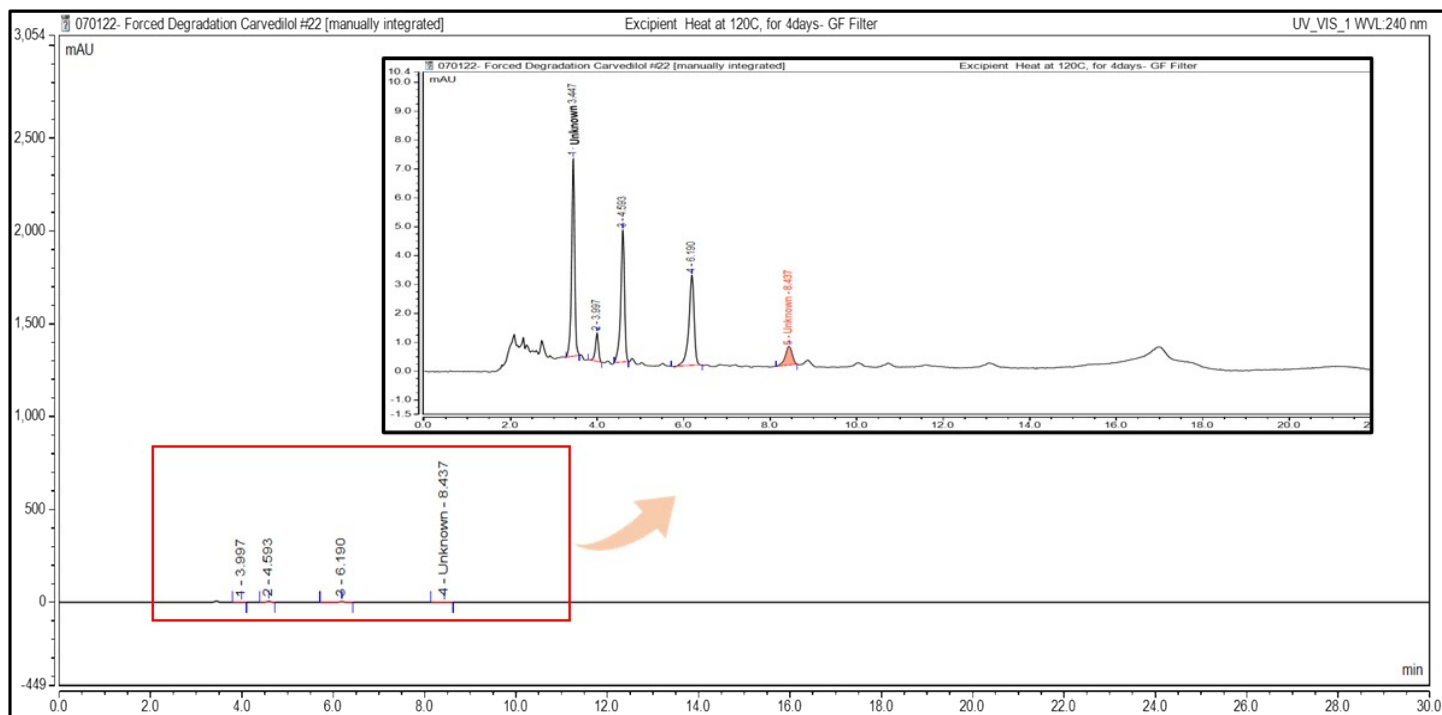

**Figure 148S.** HPLC chromatogram of thermal degradation of excipients at 120 °C for 4 days.

## Photostability (Sunlight degradation)- CARV

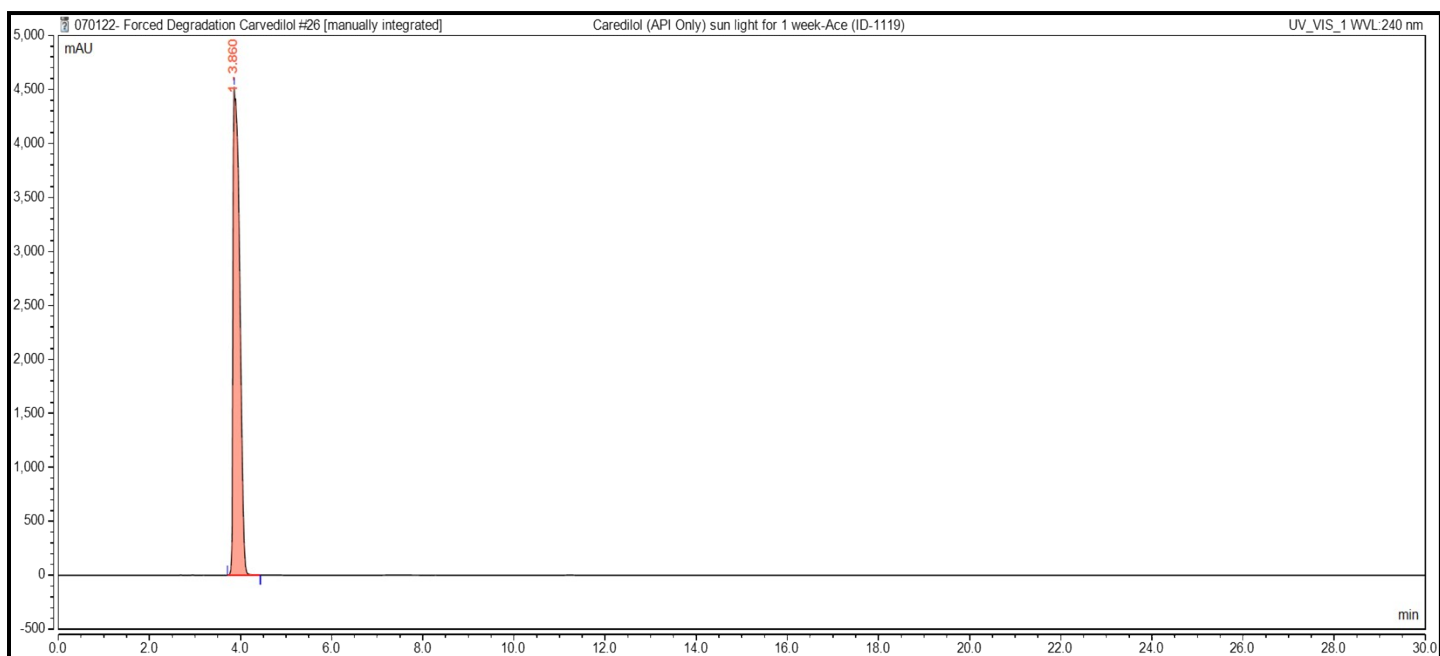

Figure 149S. HPLC Chromatogram of Photostability degradation of CARV for 1 week.

## CARV-MEOG-Photostability (Sun light degradation)

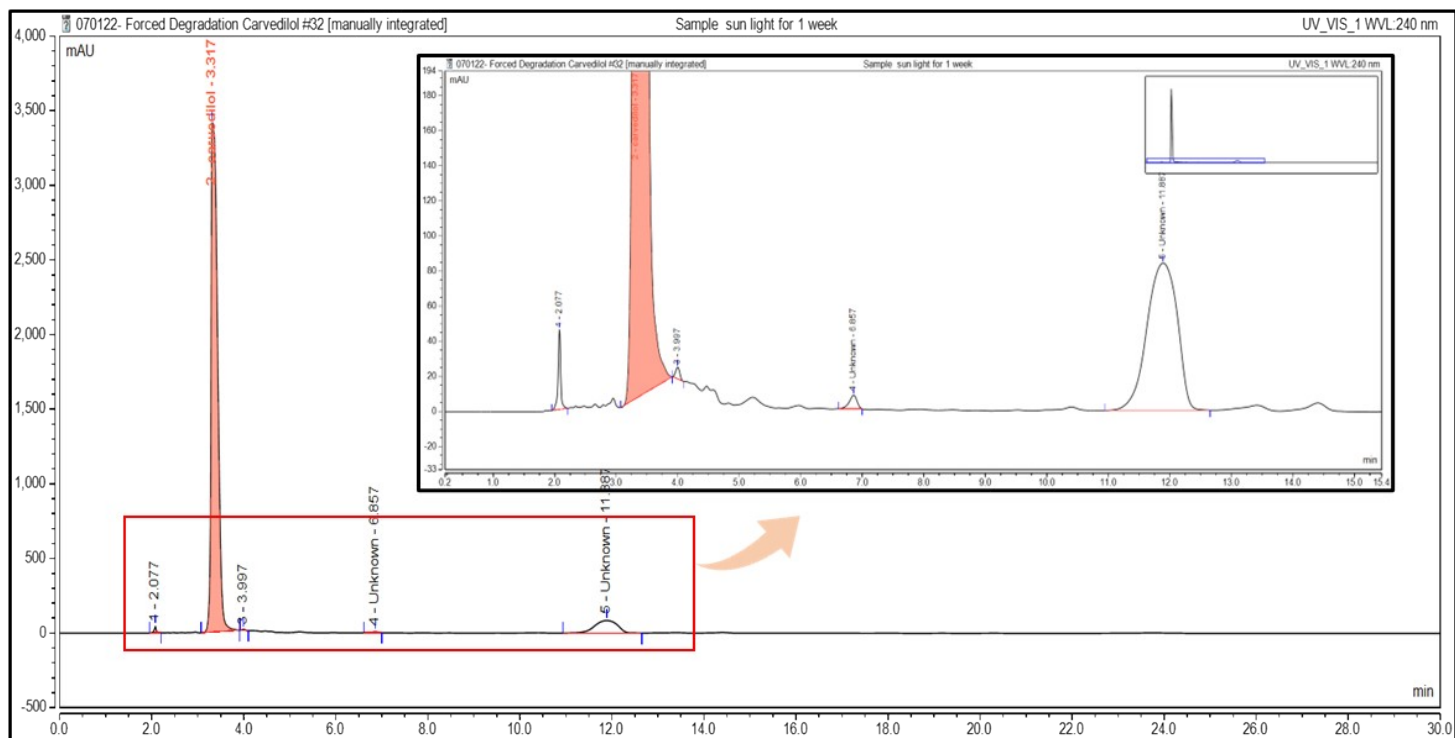

Figure 150S. HPLC chromatogram of photostability degradation of CARV-MEOG for 1 week.

### Excipient- Microemulsion Loaded Oleogel-Thermal Degradation:

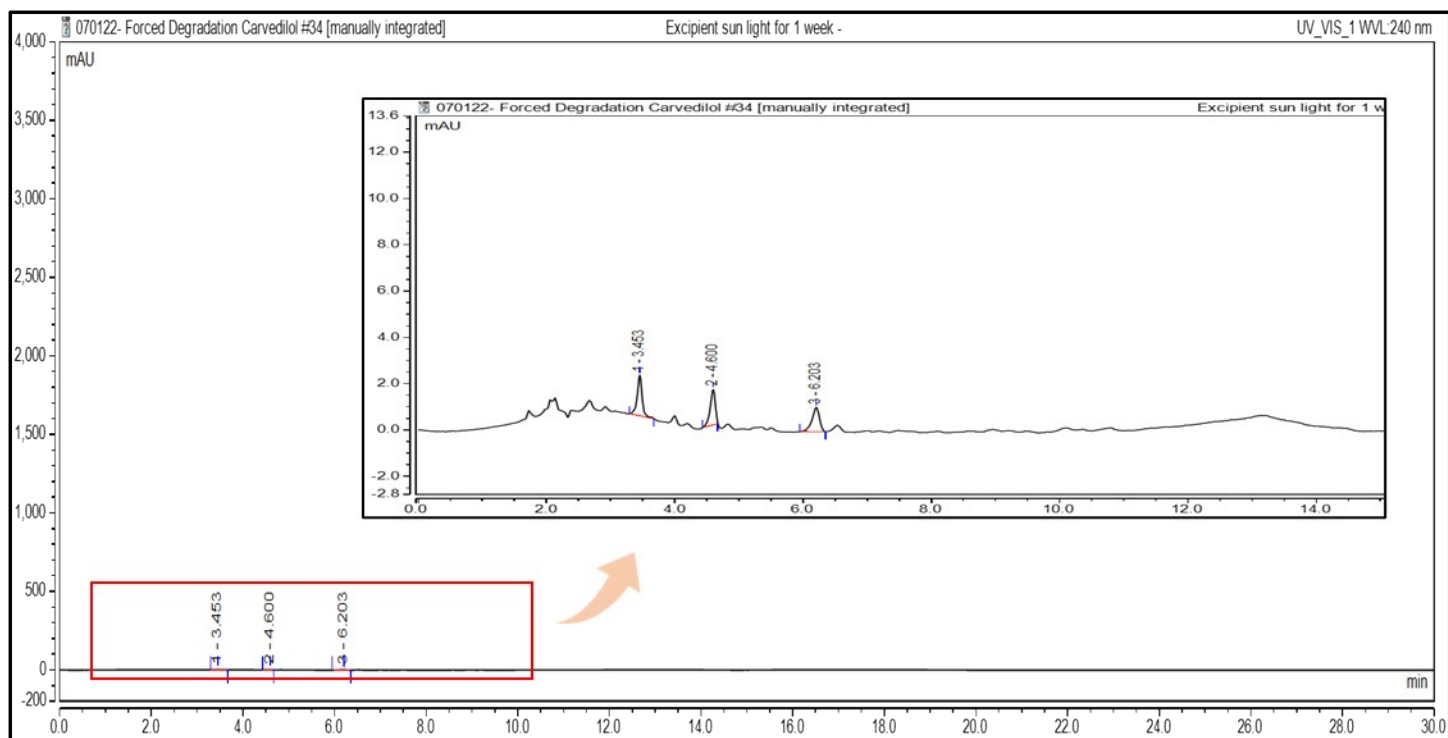

Figure 151S. HPLC chromatogram of photostability degradation of excipient for 1 week.

### Air Degradation-CARV:

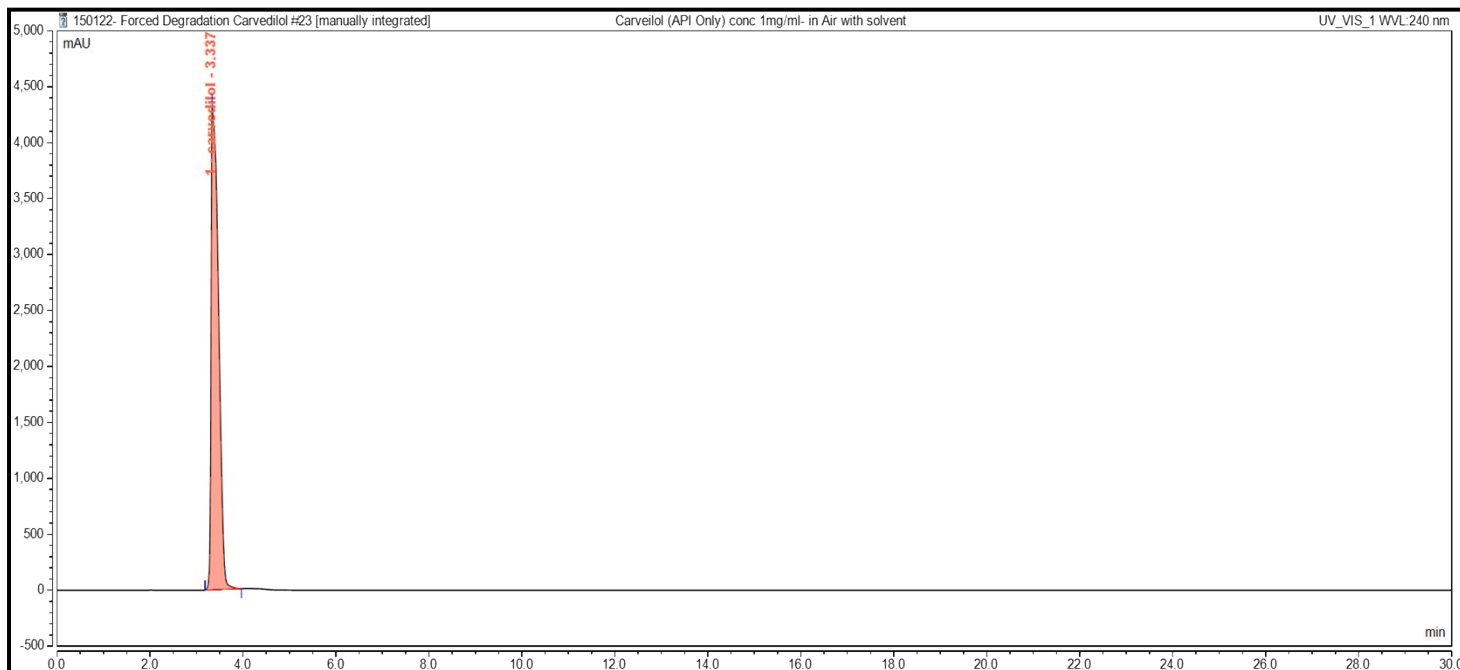

Figure 152S. HPLC chromatogram of air degradation of CARV with solvent for 24 h.

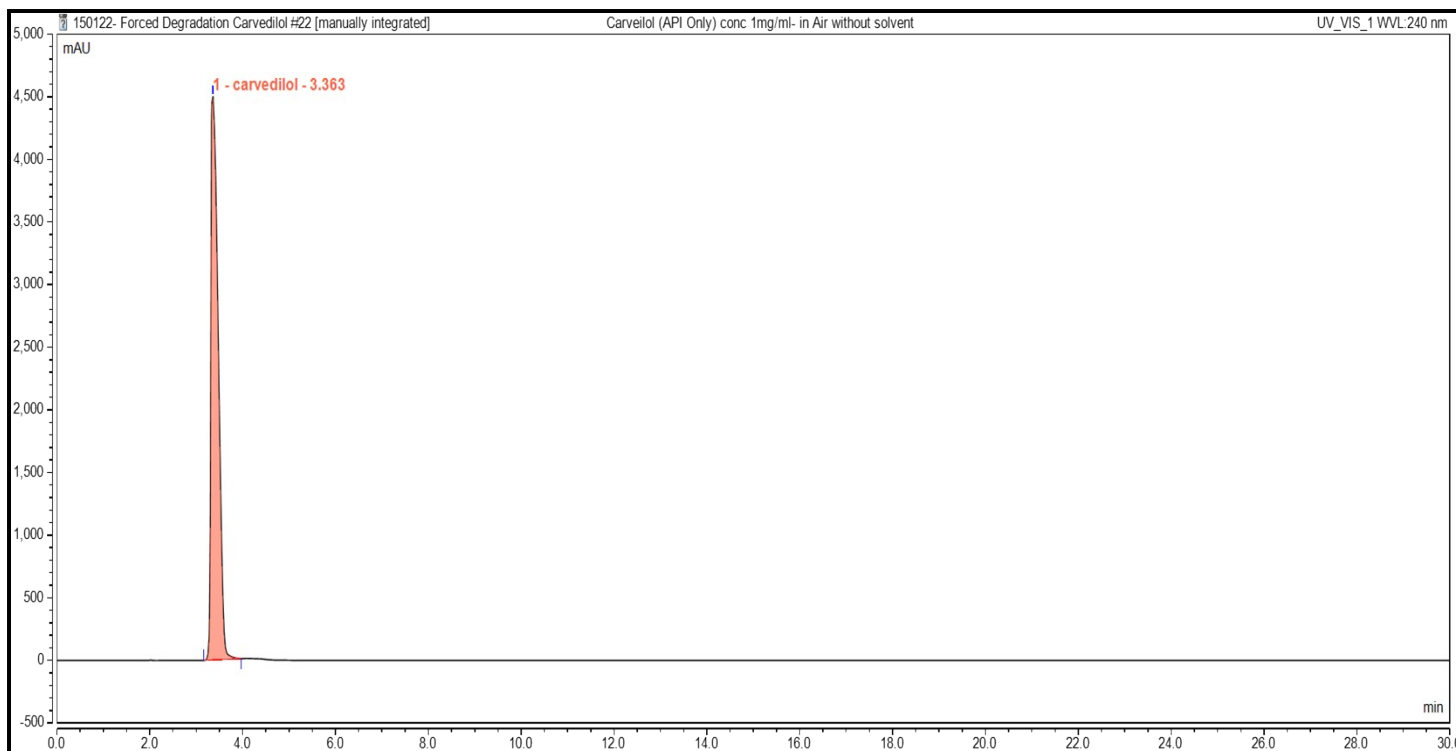

**Figure 153S.** HPLC chromatogram of air degradation of CARV without solvent for 24 h.

### CARV-MEOG-Air Degradation:

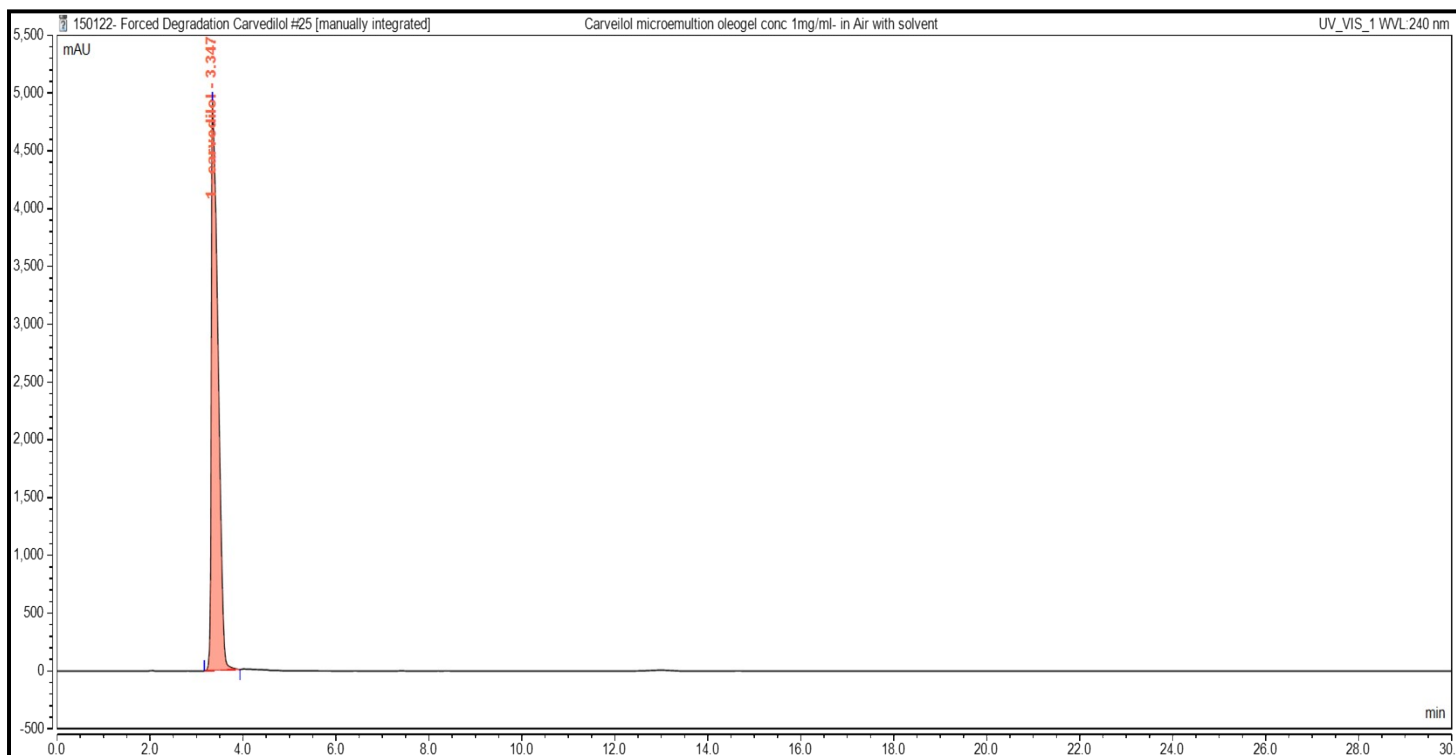

**Figure 154S.** HPLC chromatogram of air degradation of CARV-MEOG with solvent for 24 h.

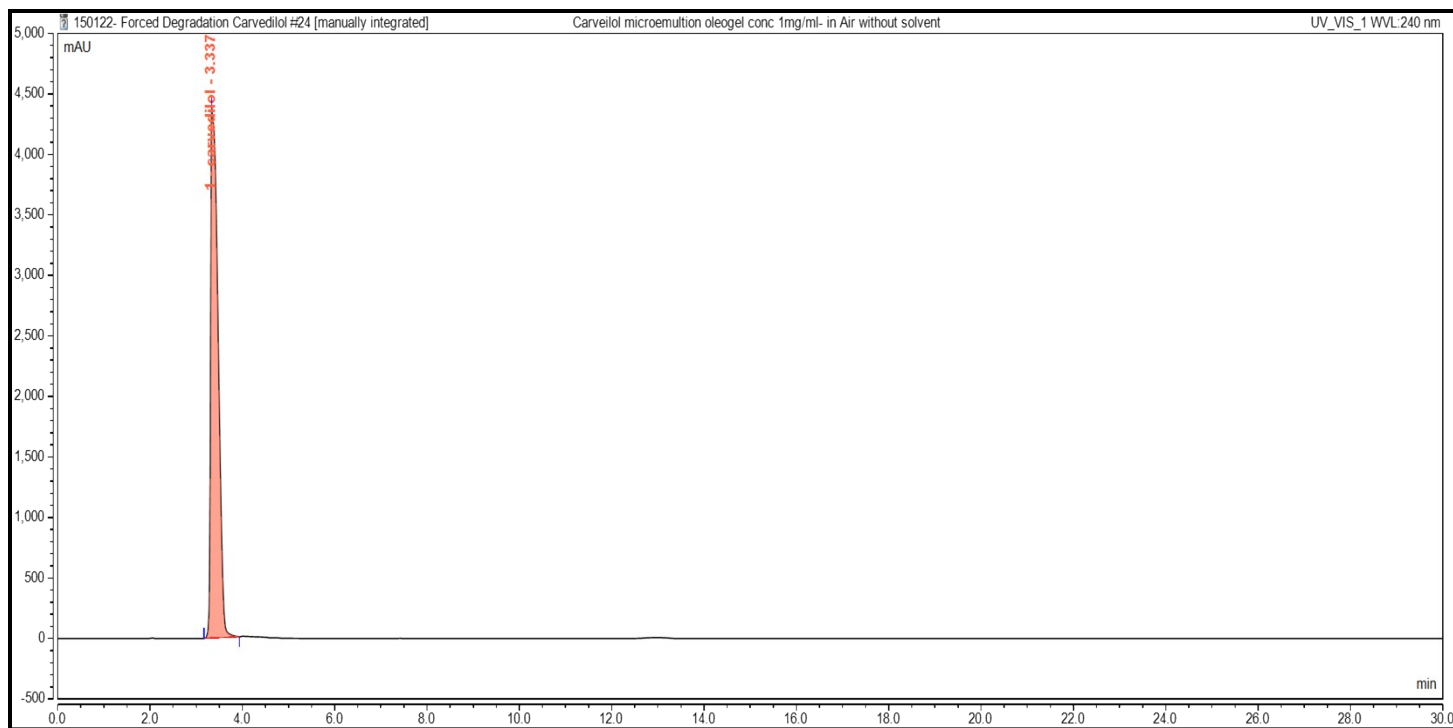

**Figure 155S.** HPLC chromatogram of air degradation of CARV-MEOG without solvent for 24 h.

**Excipient microemulsion oleogel- Air Degradation:**

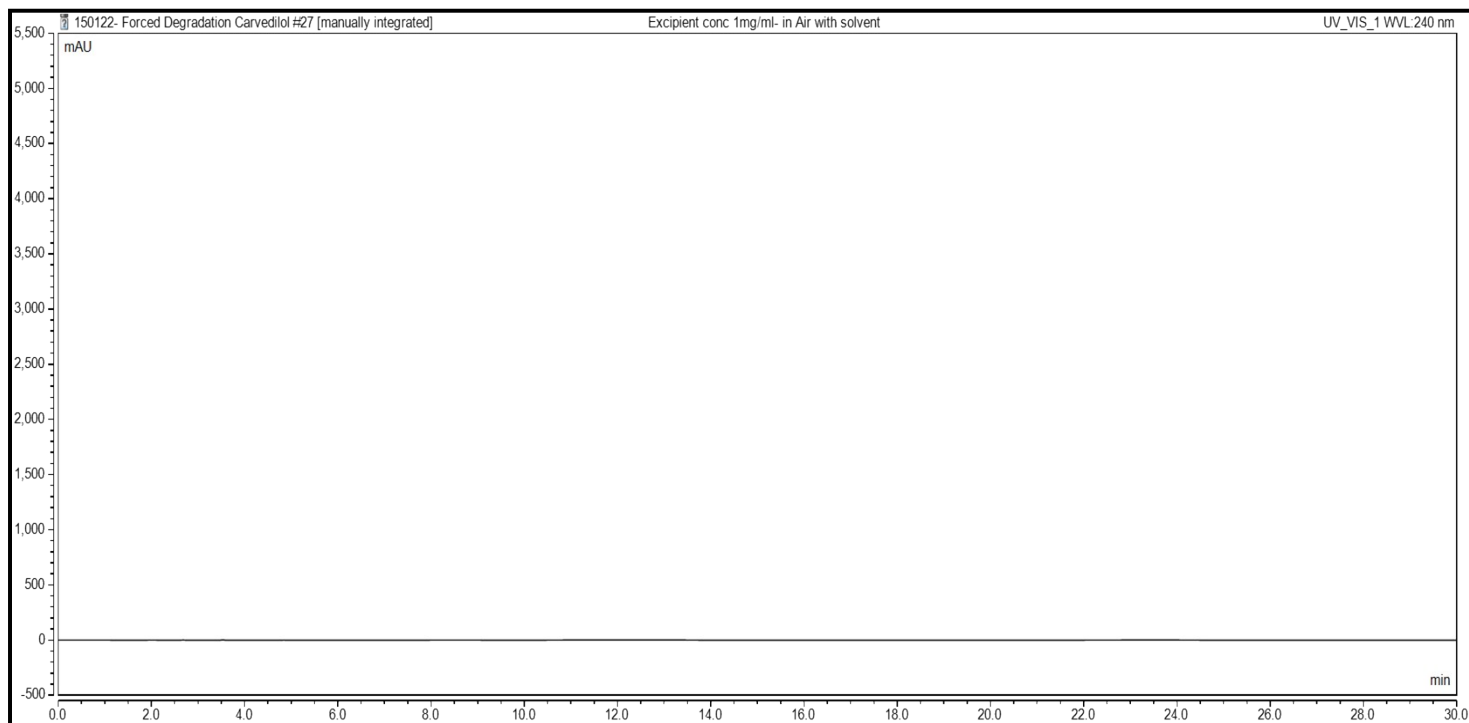

**Figure 156S.** HPLC chromatogram of air degradation of excipients with solvent for 24 h.



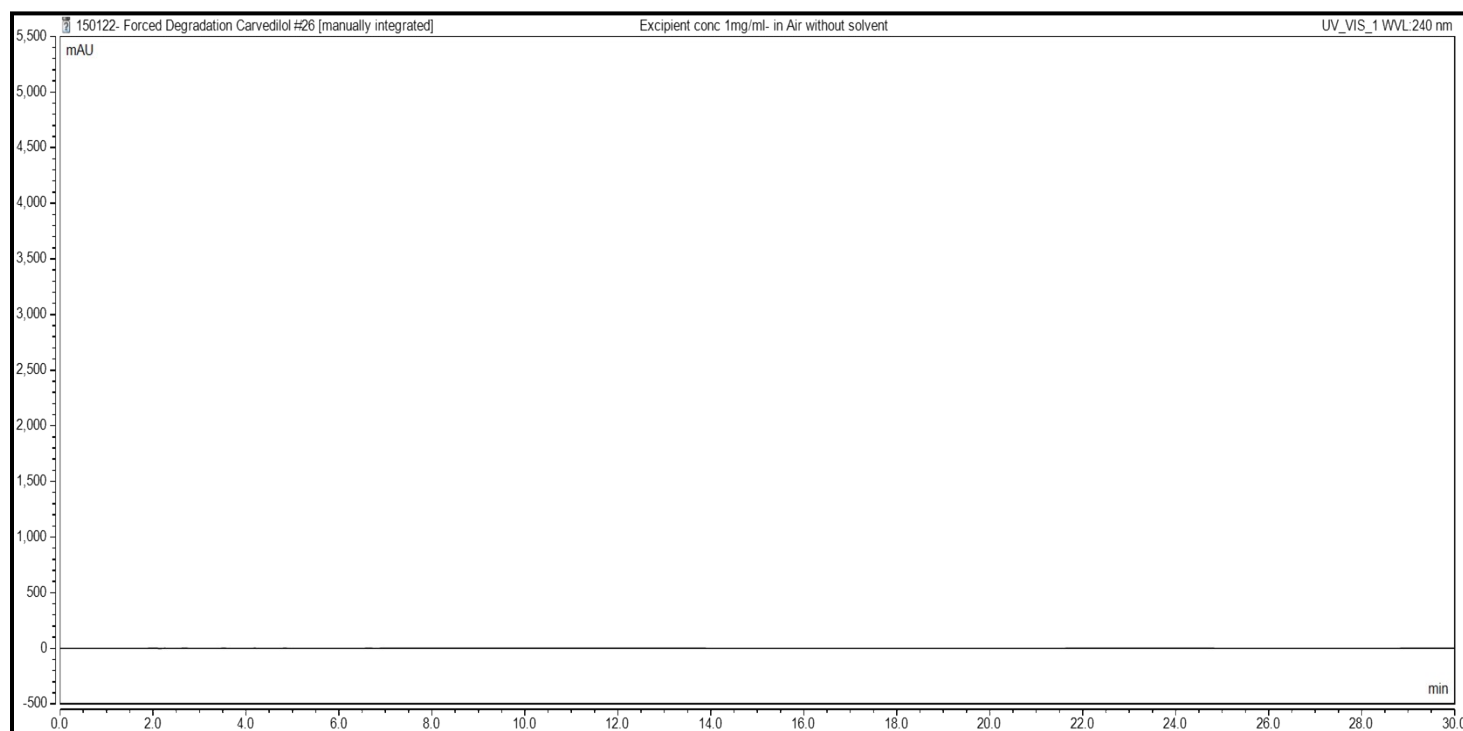

**Figure 157S.** HPLC chromatogram of air degradation of excipients without solvent for 24 h.

## LC-MS Chromatograms:

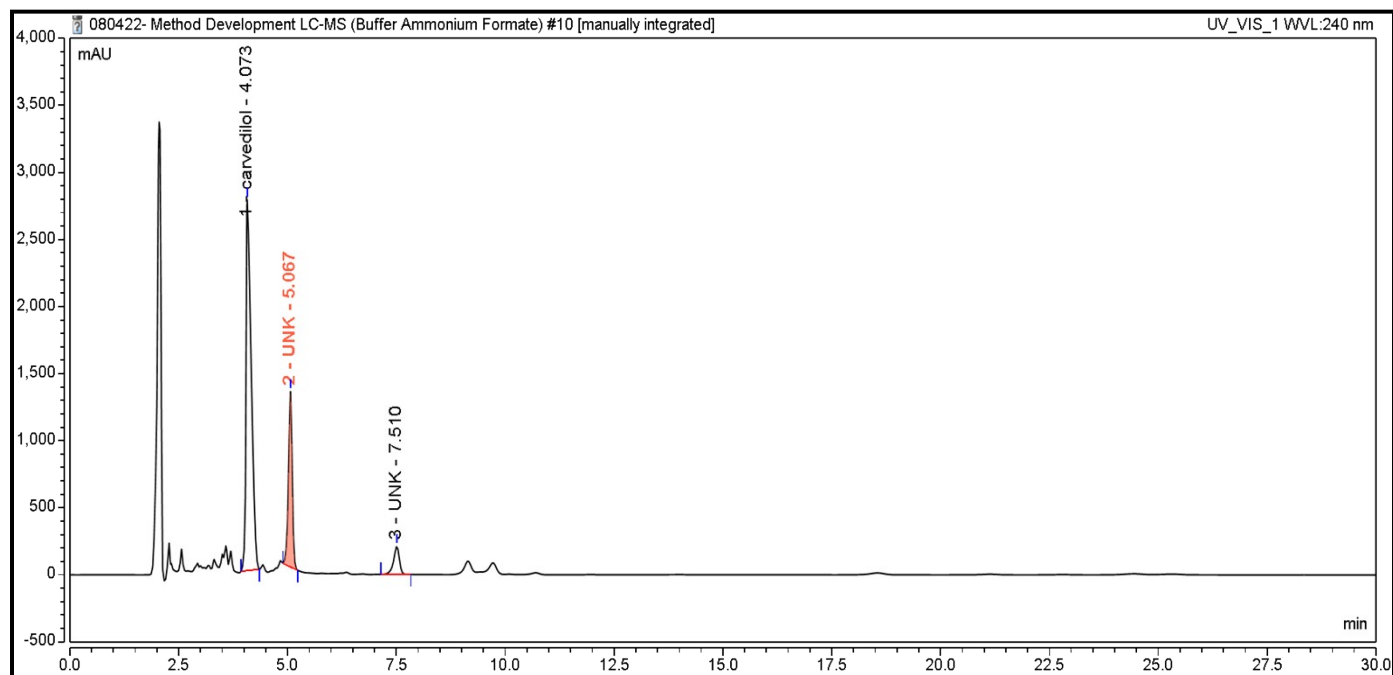

**Figure 158S.** HPLC chromatogram of oxidative degradation of CARV 35% H<sub>2</sub>O<sub>2</sub> at RT for 24 h (ammonium formate buffer).

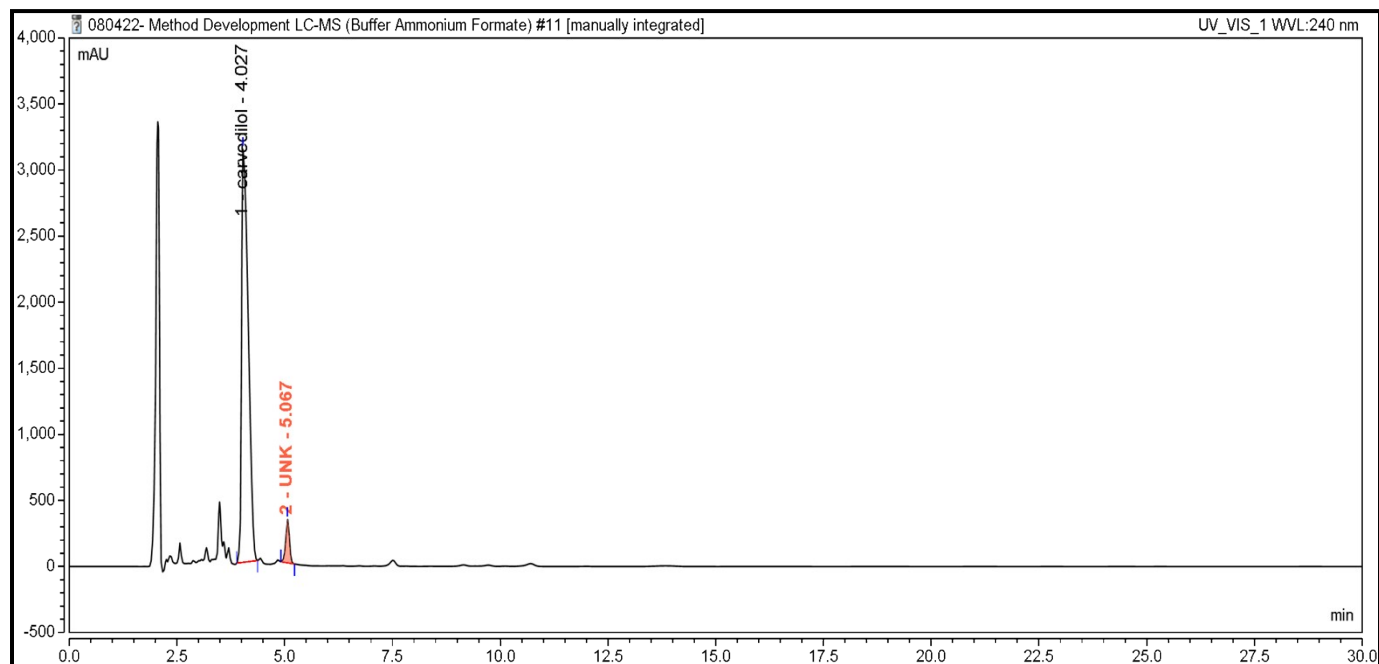

**Figure 159S.** HPLC chromatogram of oxidative degradation of CARV-MEOG 35% H<sub>2</sub>O<sub>2</sub> at RT for 24 h (ammonium formate buffer).

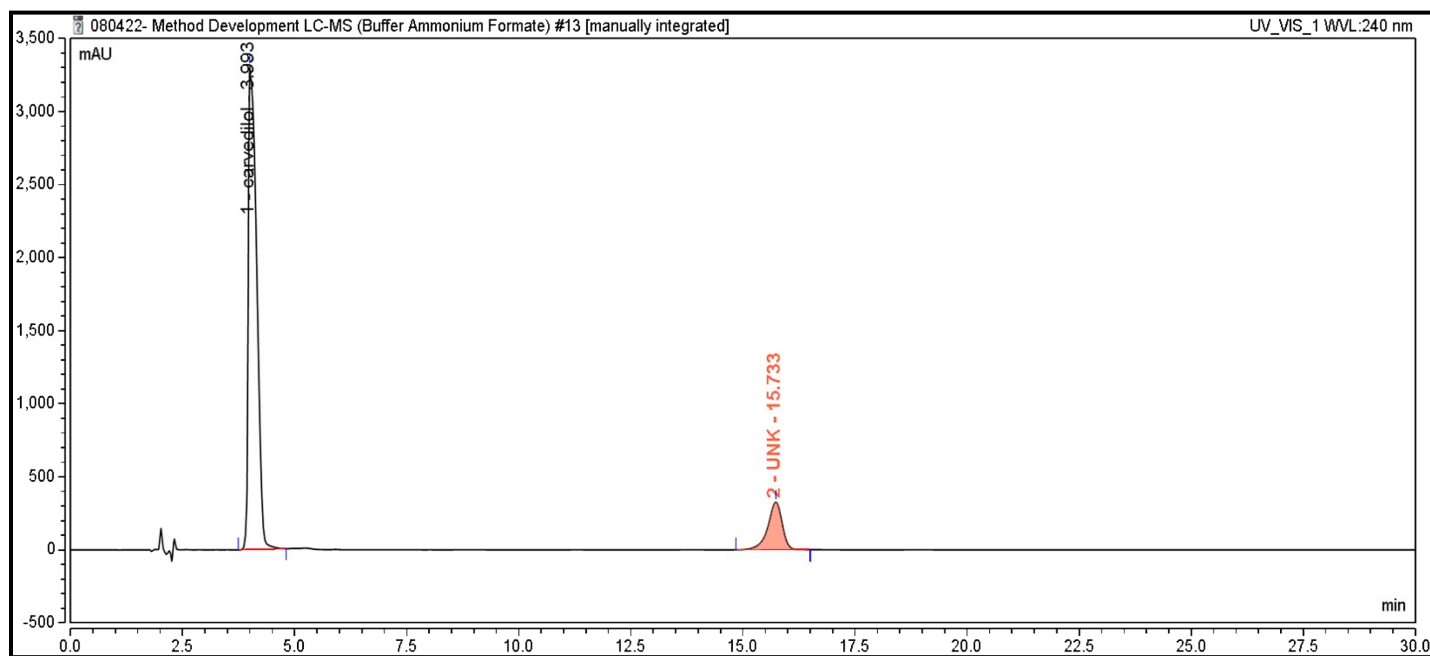

**Figure 160S.** HPLC chromatogram of basic degradation of carvedilol 1M NaOH at 85 °C for 14 h (ammonium formate buffer).

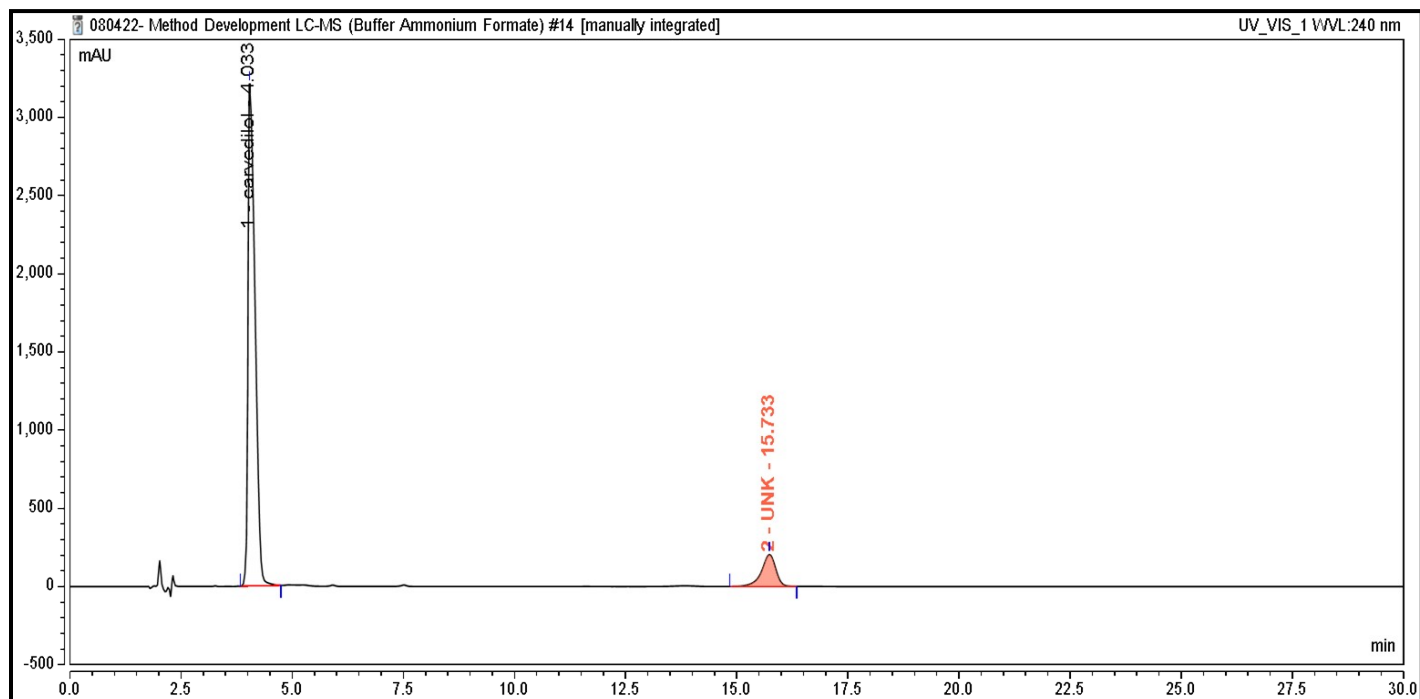

**Figure 161S.** HPLC chromatogram of basic degradation of CARV-MEOG 1M NaOH at 85 °C for 14 h (ammonium formate buffer).

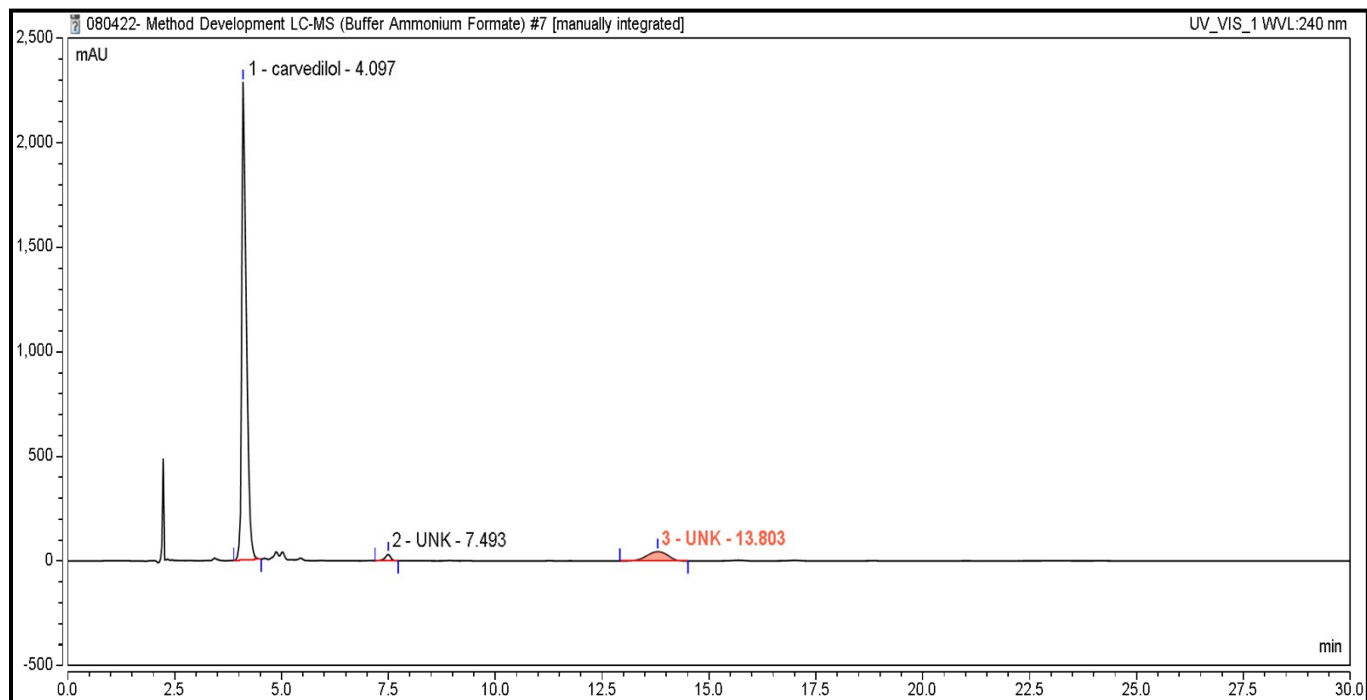

**Figure 162S.** HPLC chromatogram of thermal degradation of CARV-MEOG at 120 °C for 3 days  
(ammonium formate buffer)

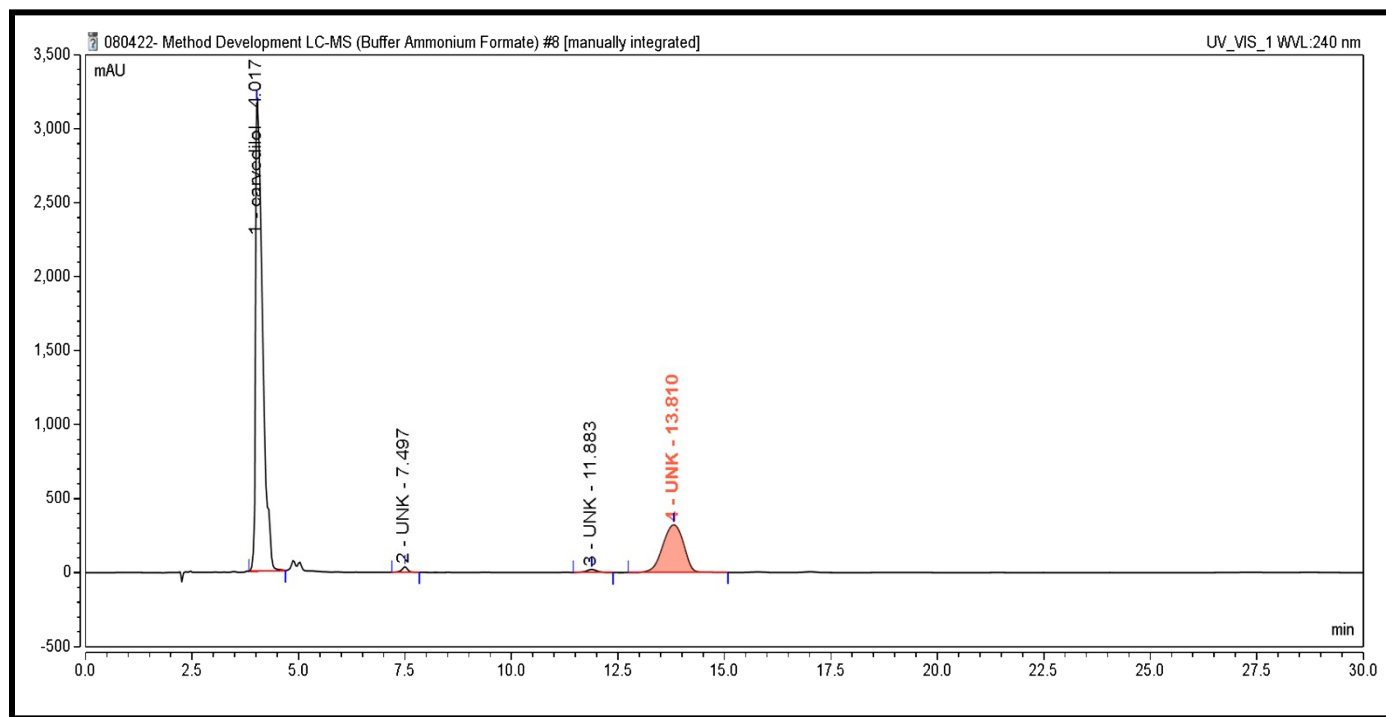

**Figure 163S.** HPLC chromatogram of CARV-MEOG-transcutol (old formula, 1 mg/ml)

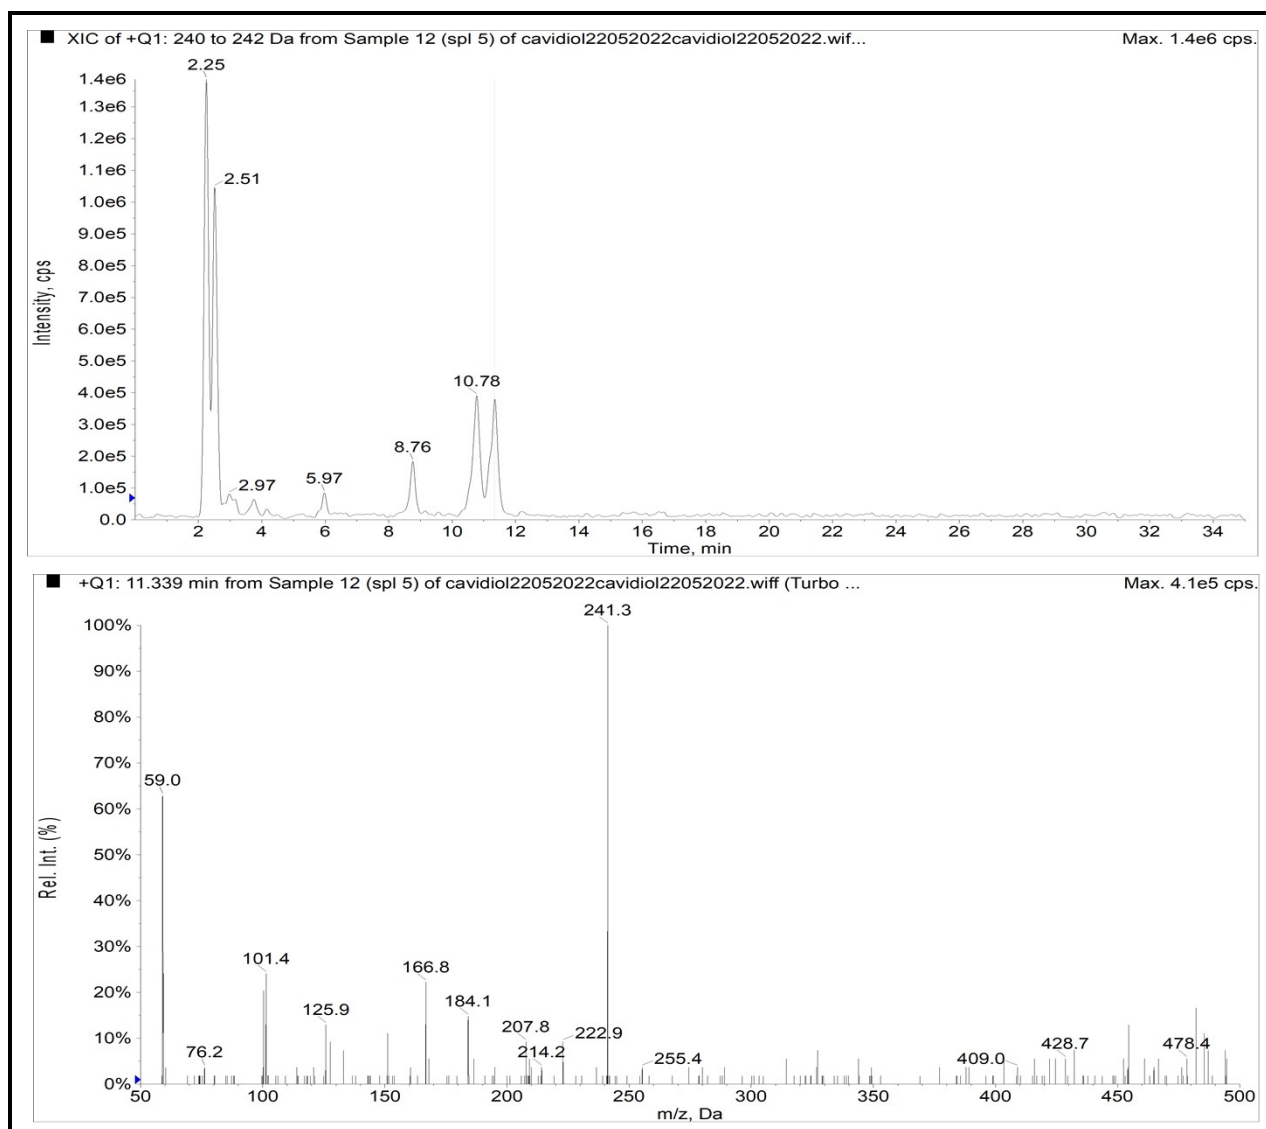

**Figure 164S.** LC/MS chromatogram of the degradant at RRT 1.4.

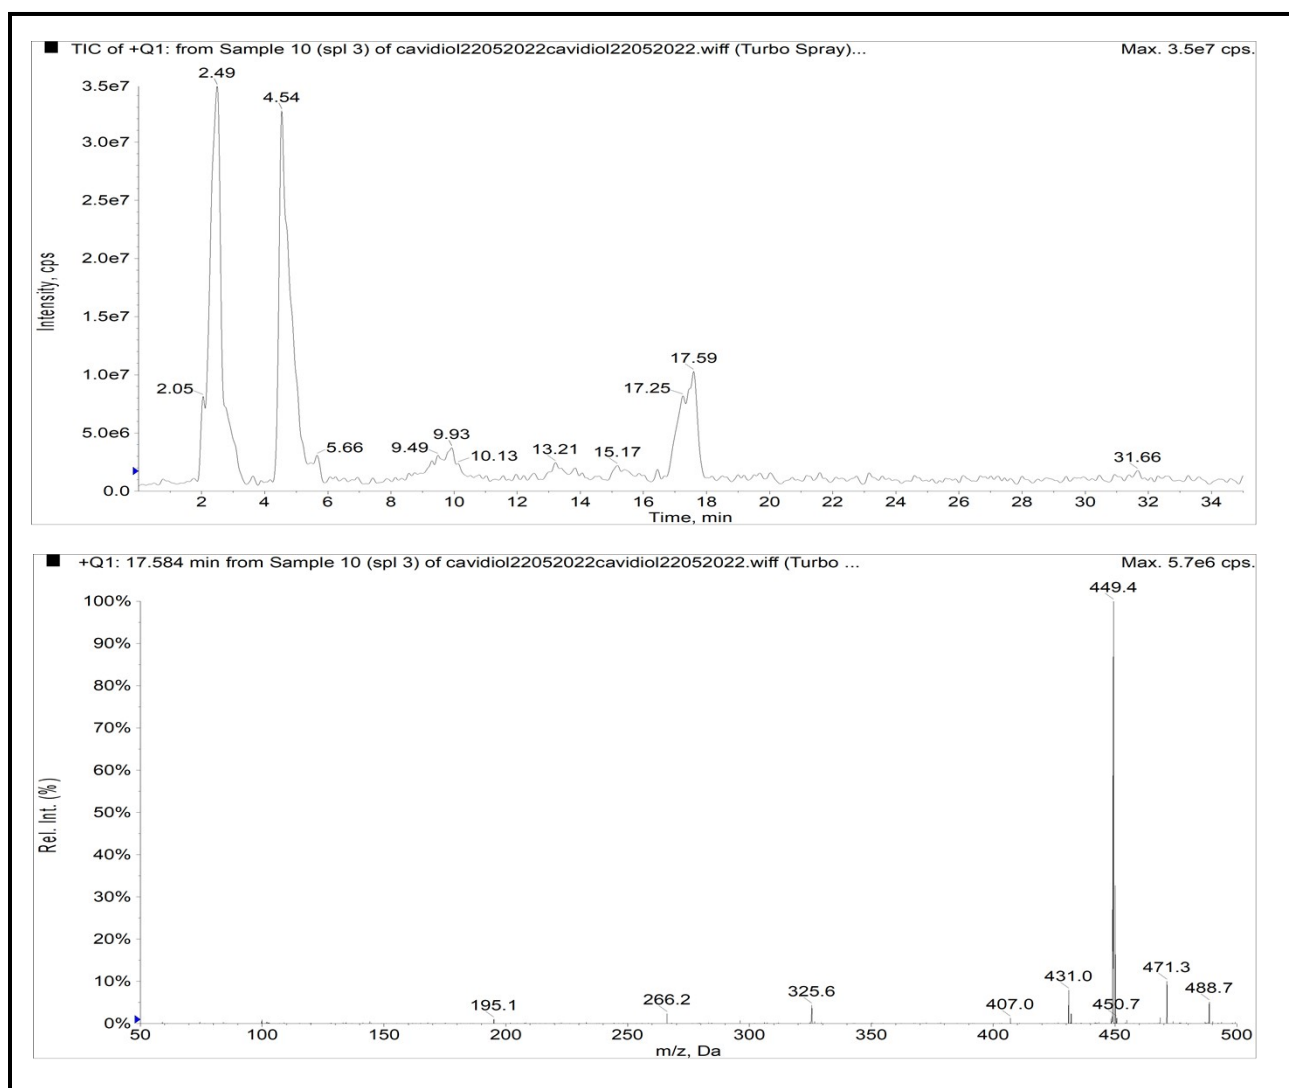

**Figure 165S.** LC/MS chromatogram of the degradant at RRT 4.2.

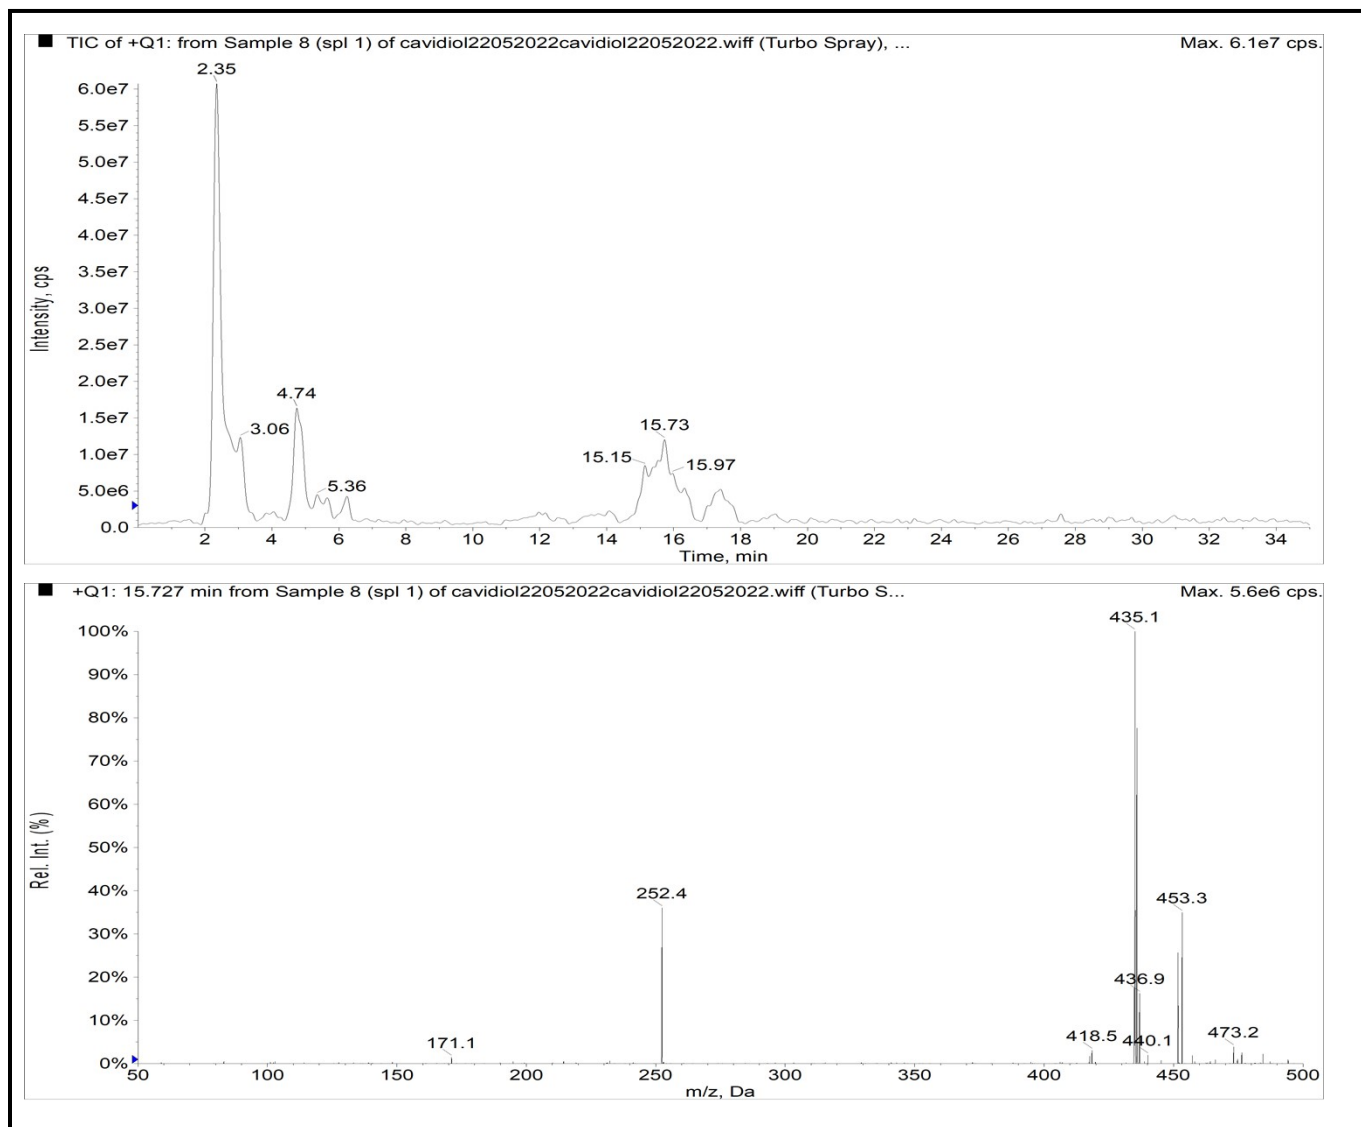

**Figure 166S.** LC/MS chromatogram of the degradant at RRT 3.7.
